# Supplementary material
Source: publisher figshare collection journal article supplement (https://gsapubs.figshare.com/articles/dataset/_/25444633)

# Rhyolite unit sample BRGIC5

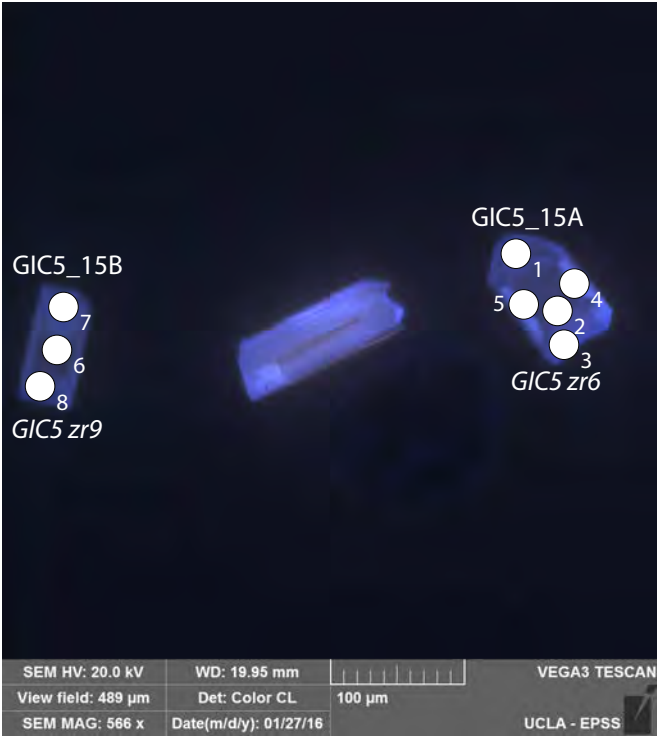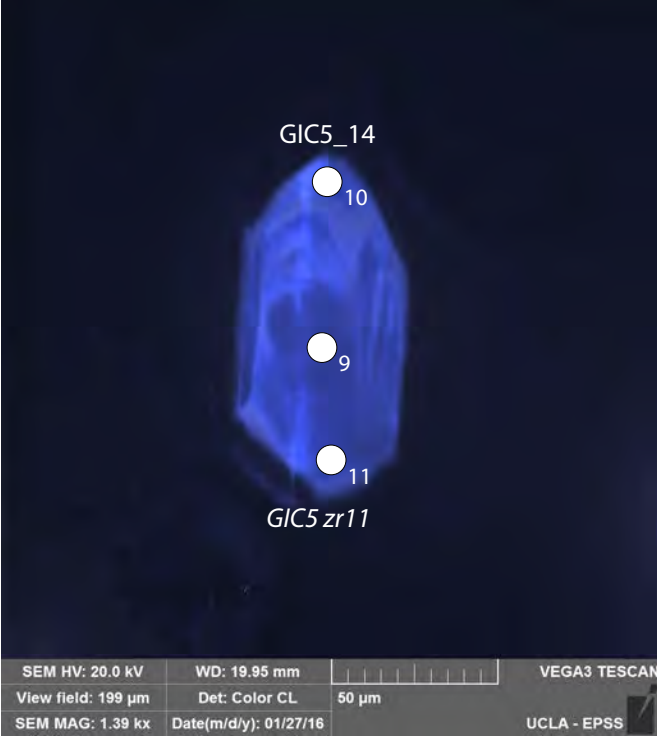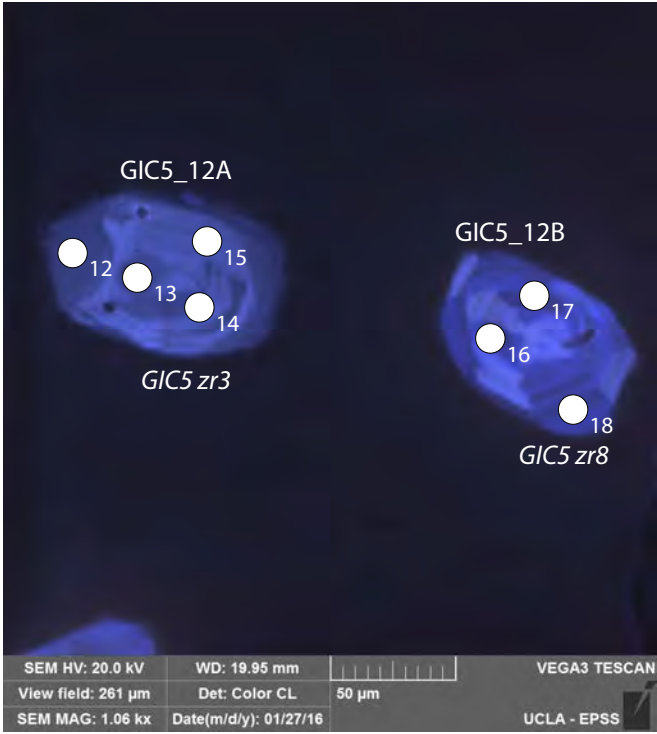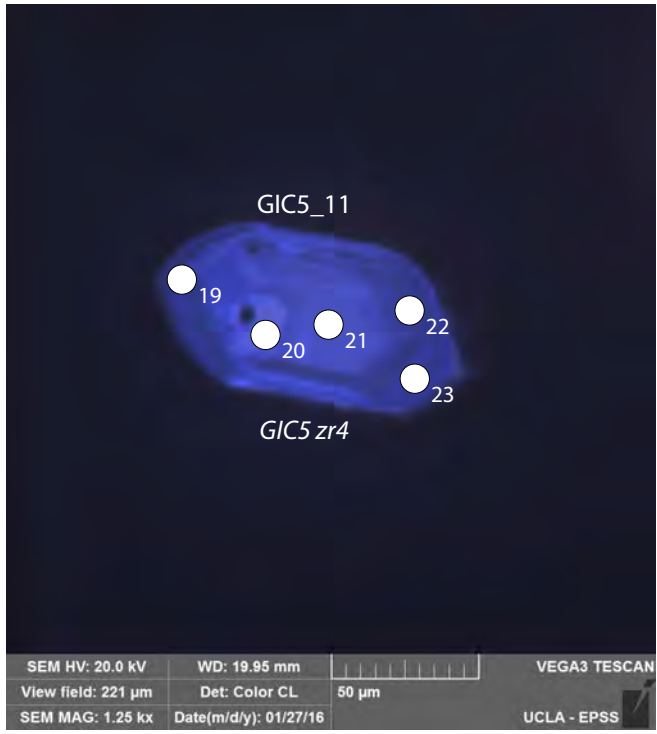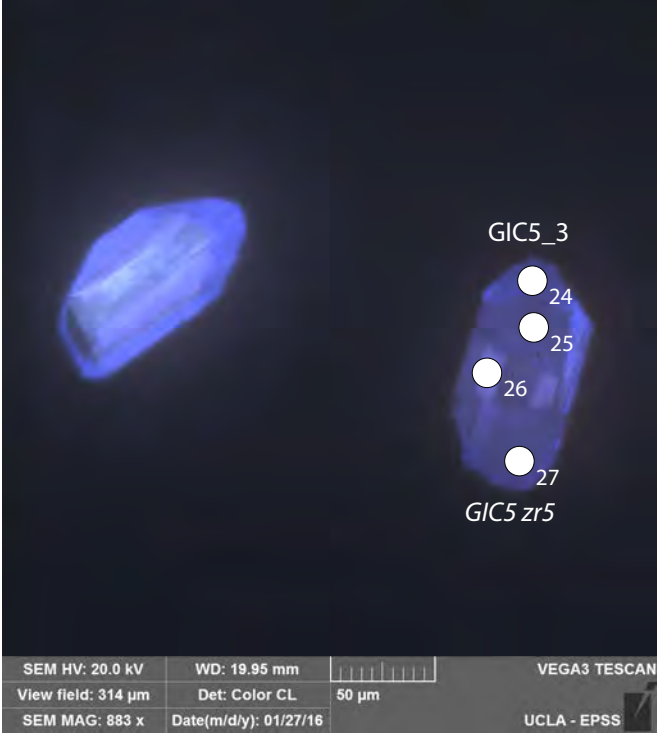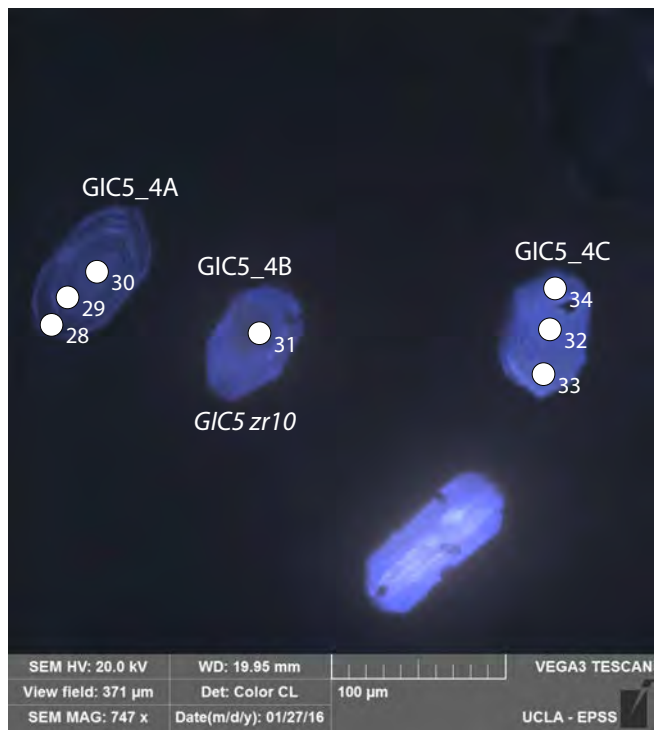

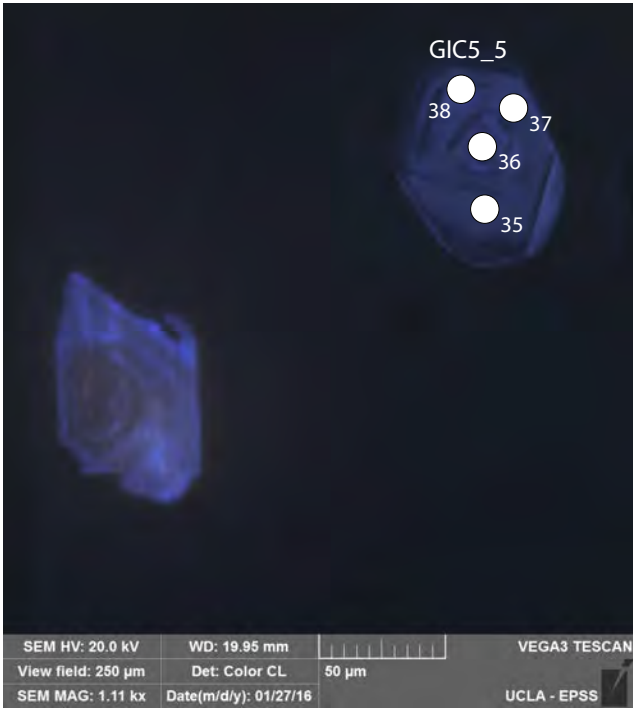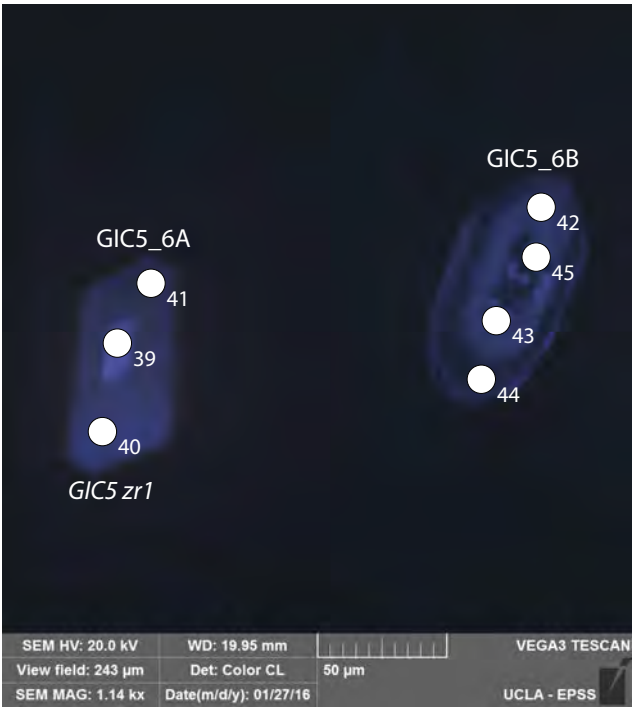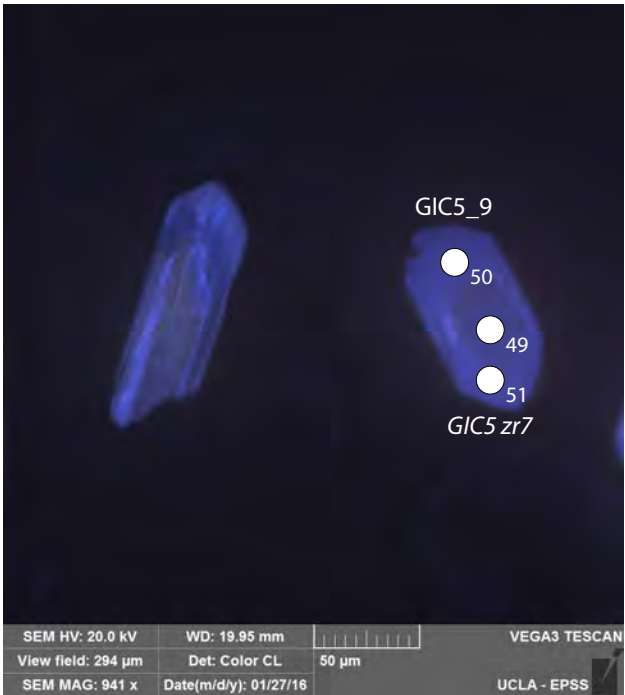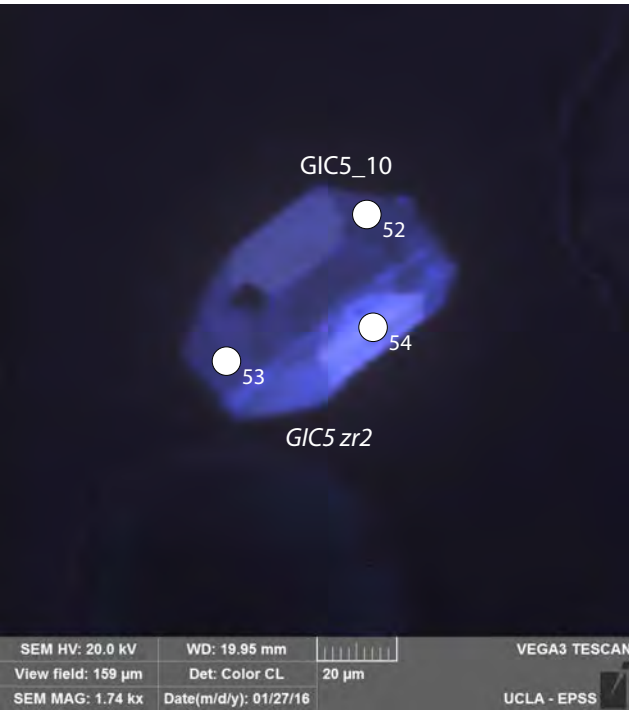

# Granite unit sample BRGIC2

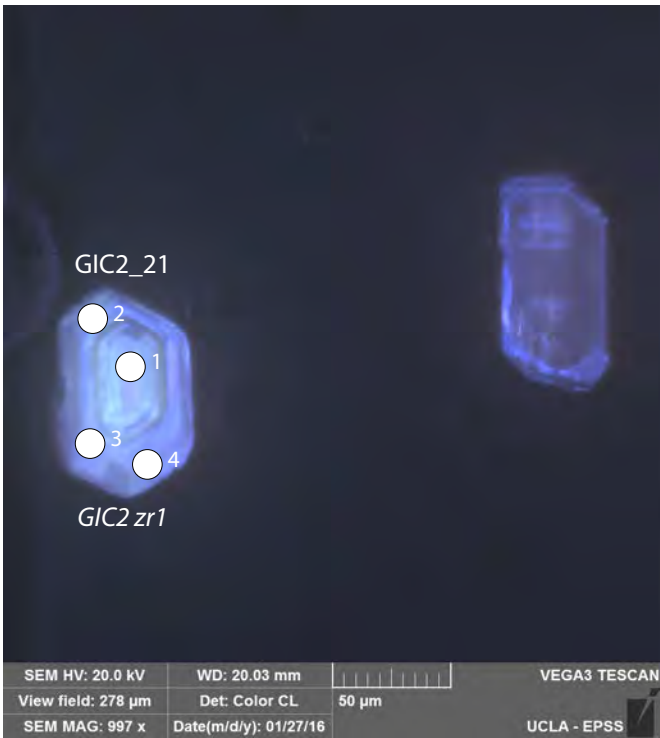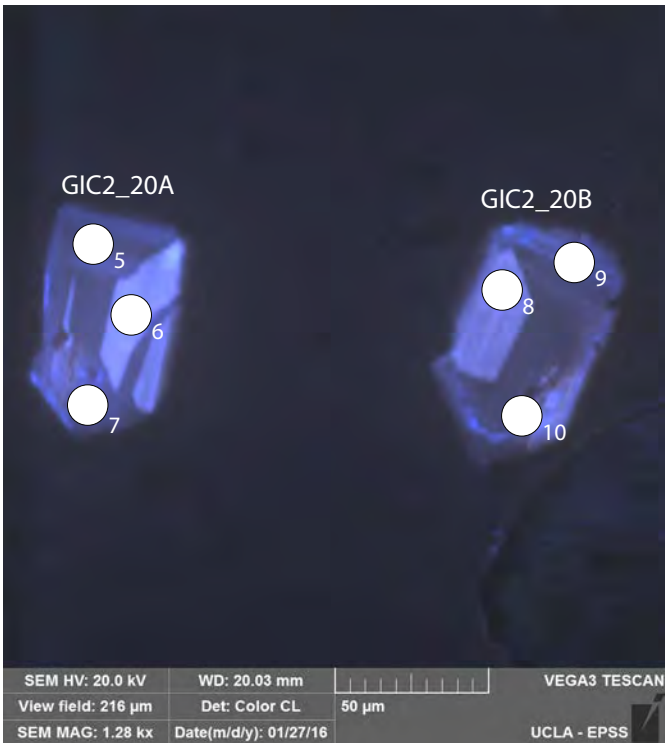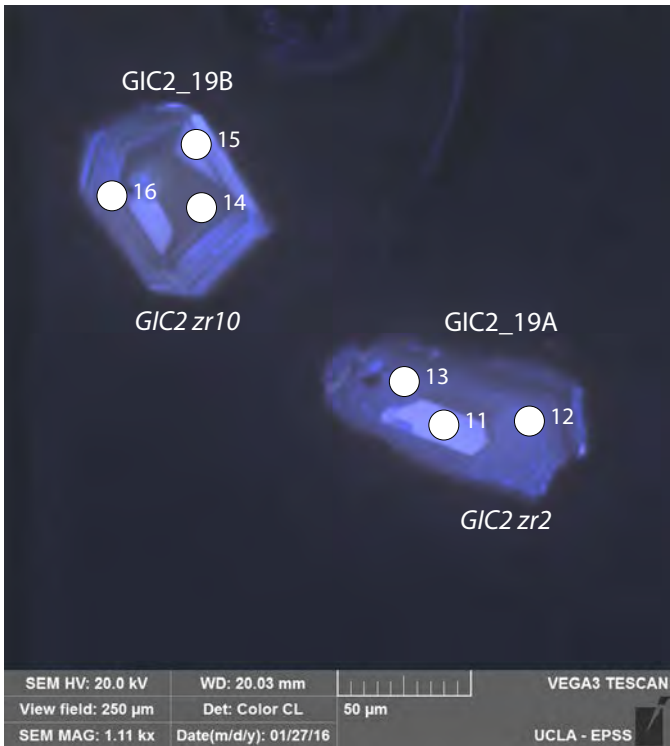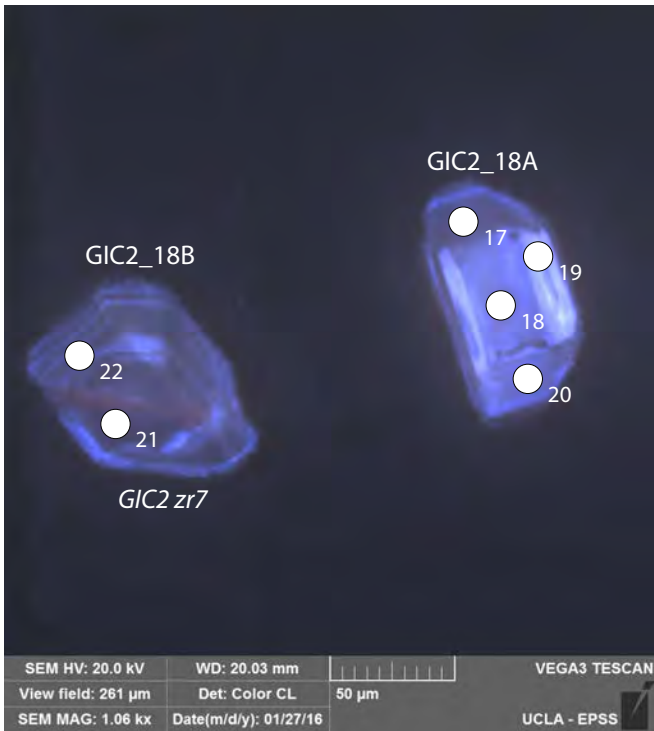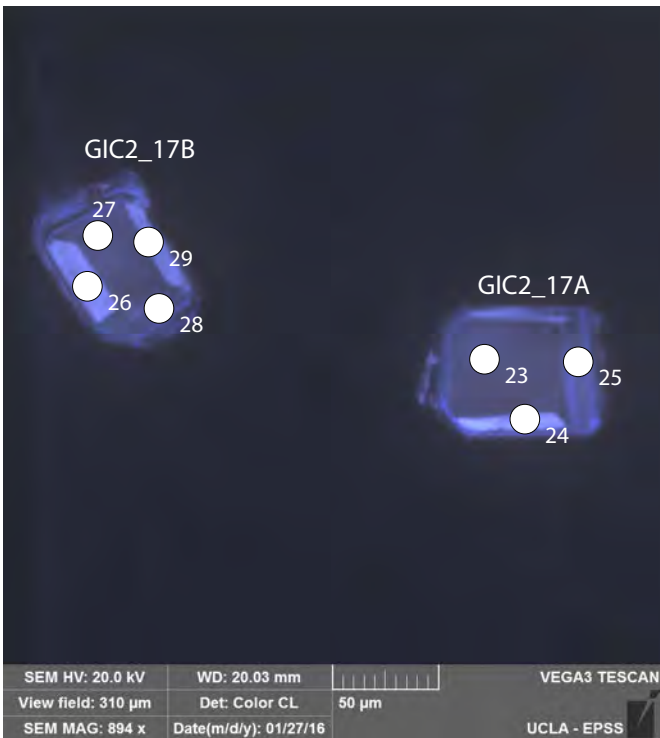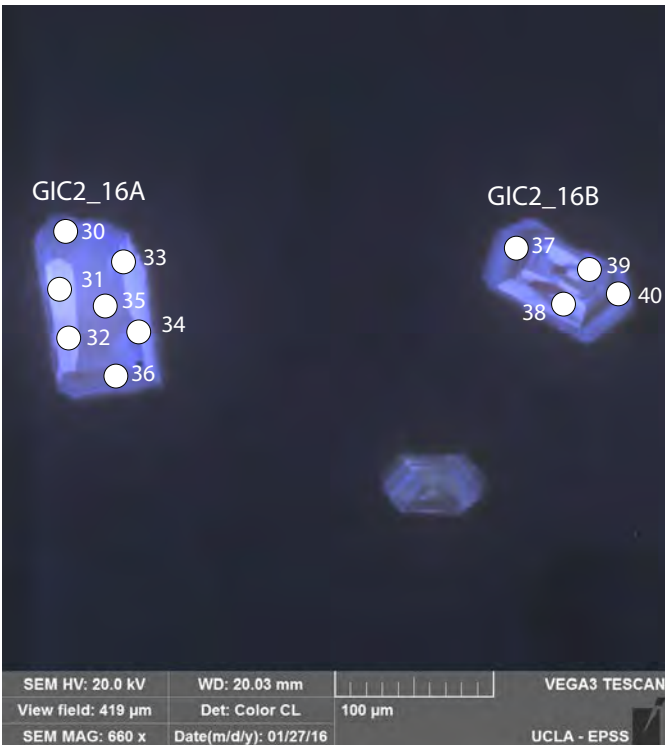



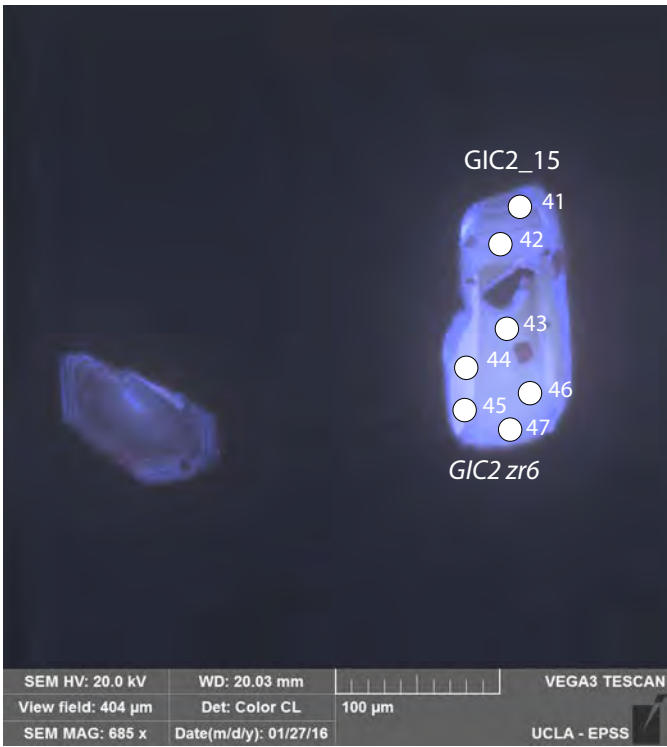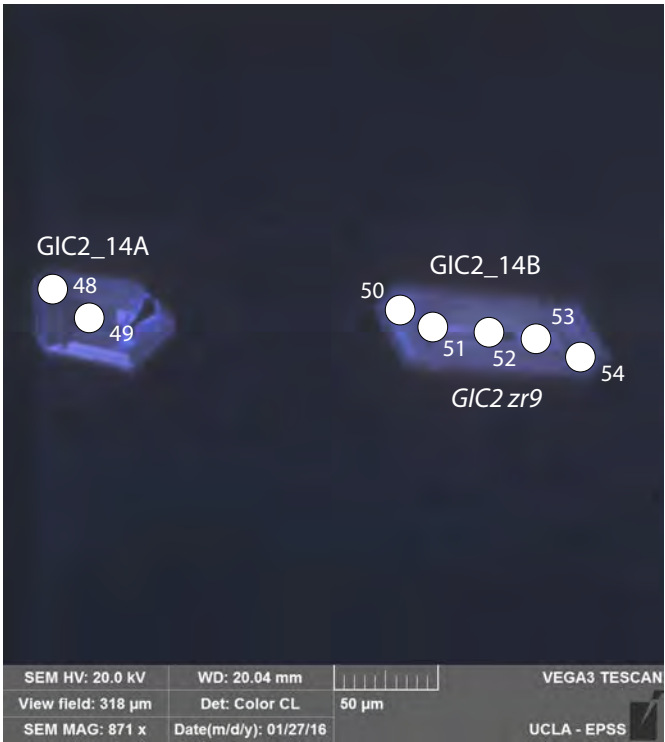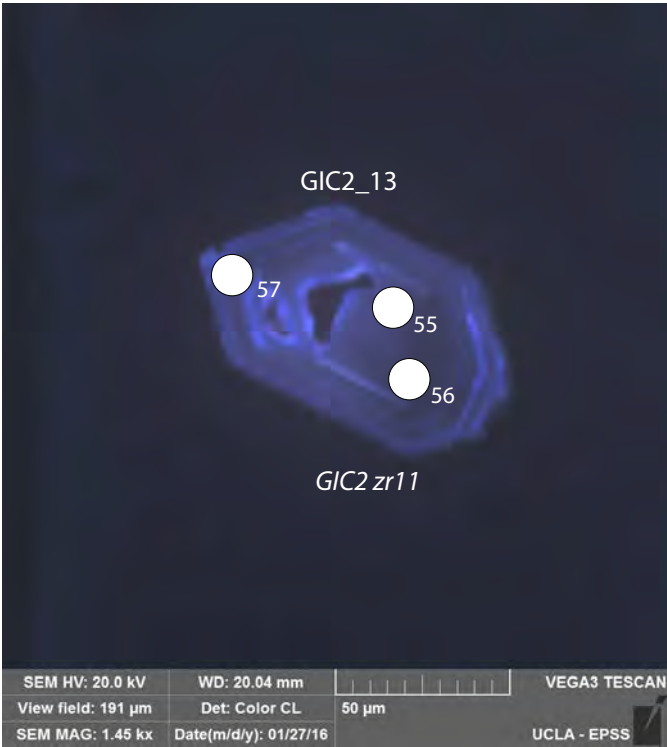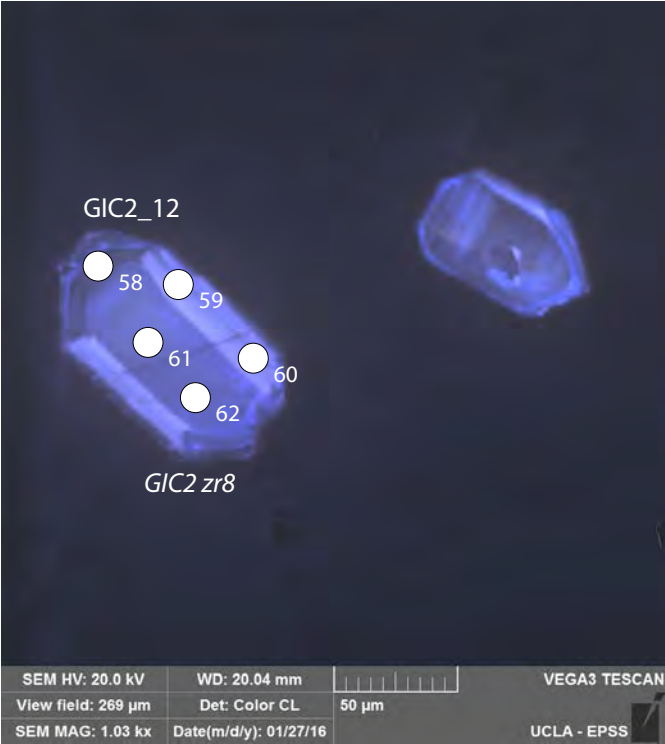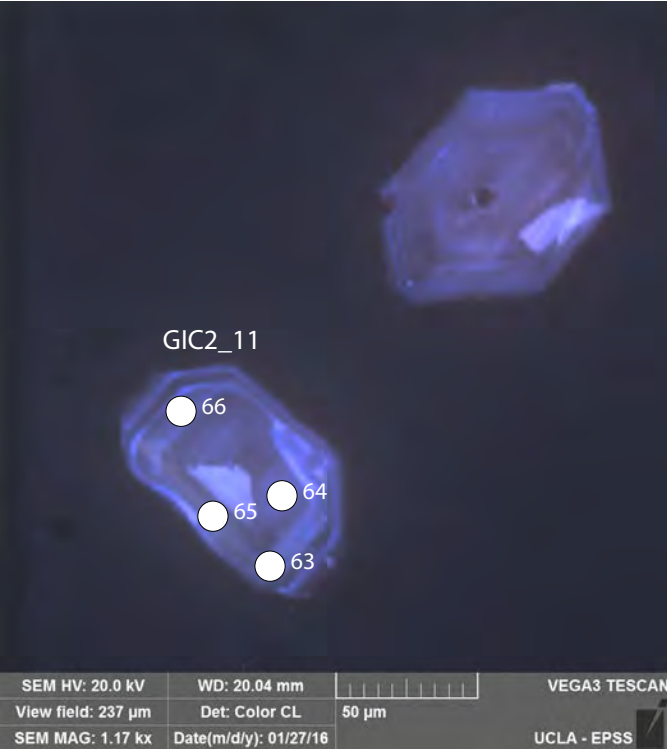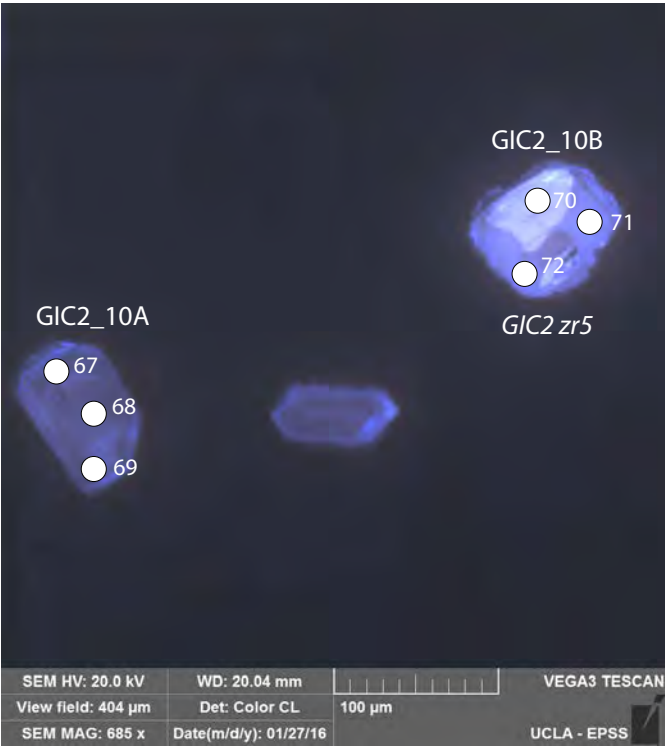

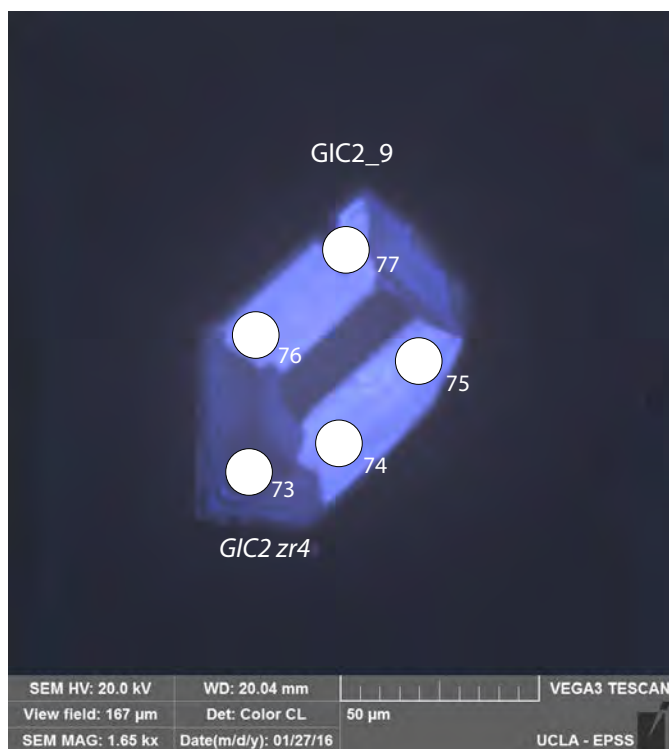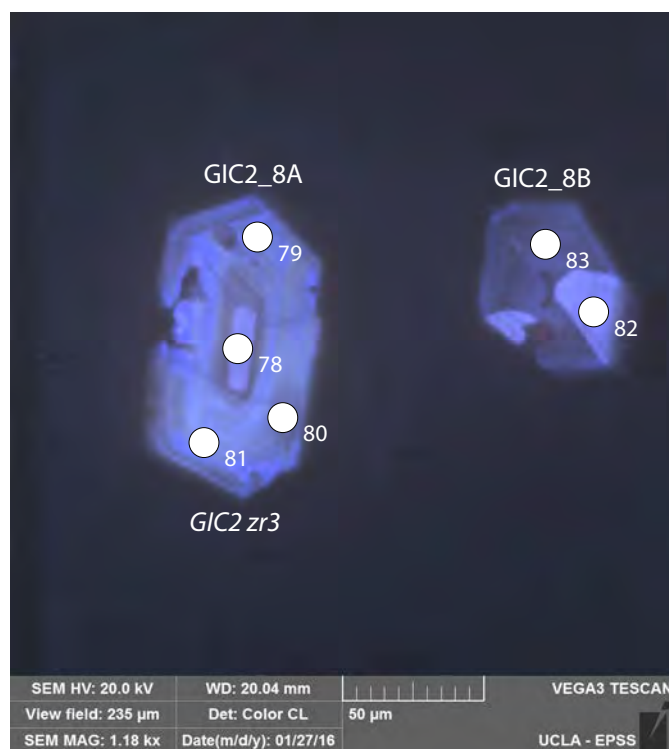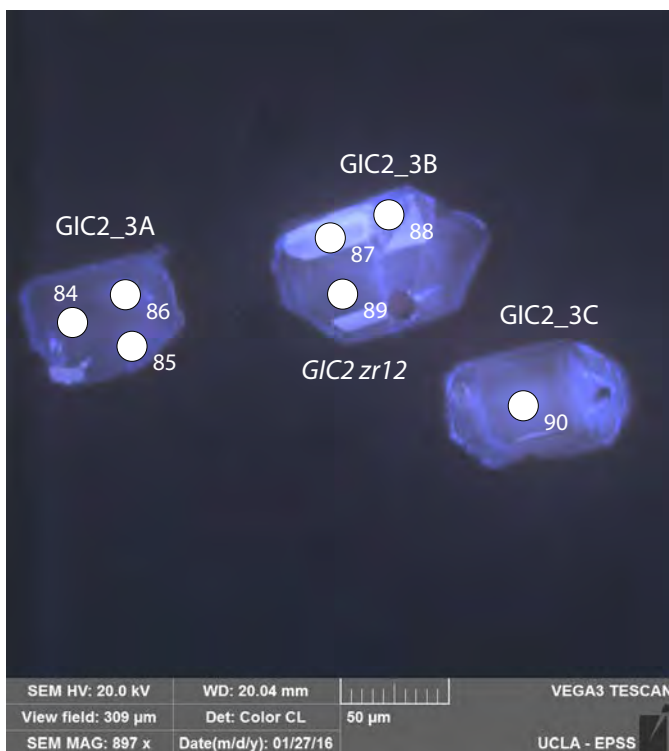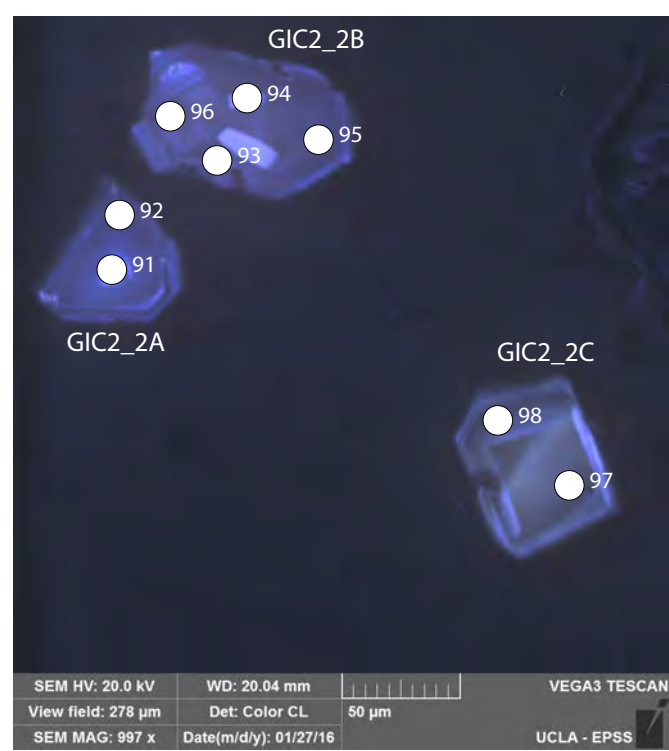

# Meladiorite unit sample BRGIC3

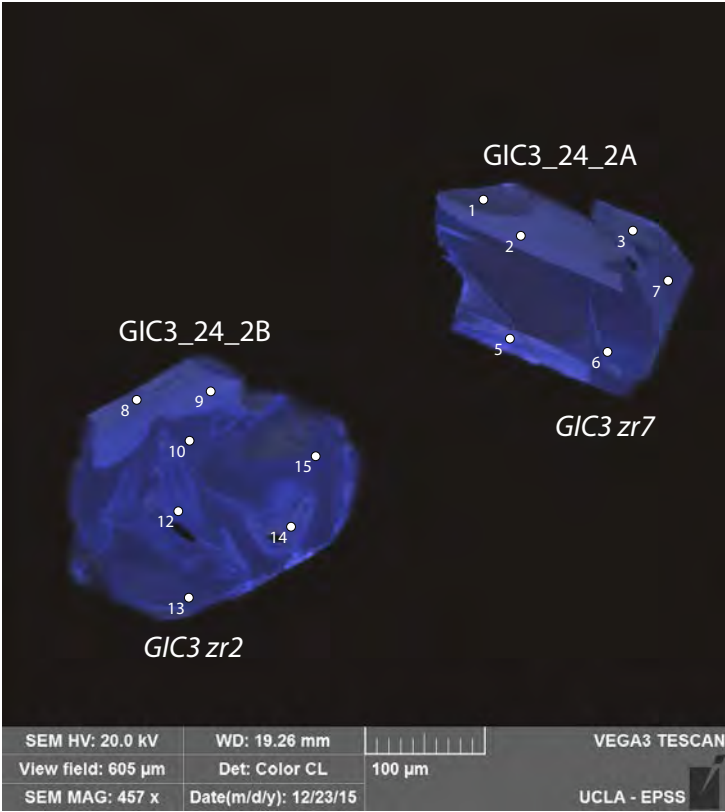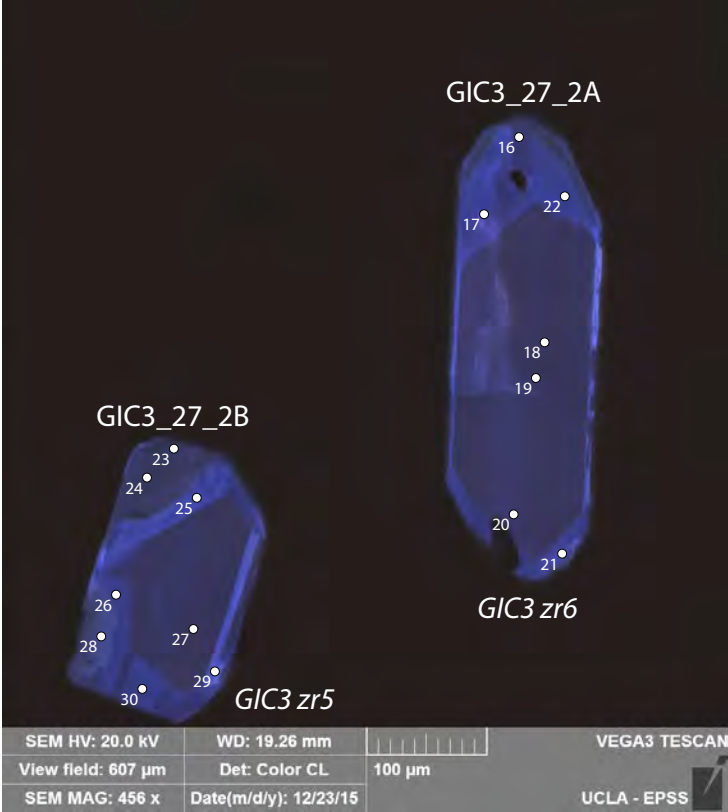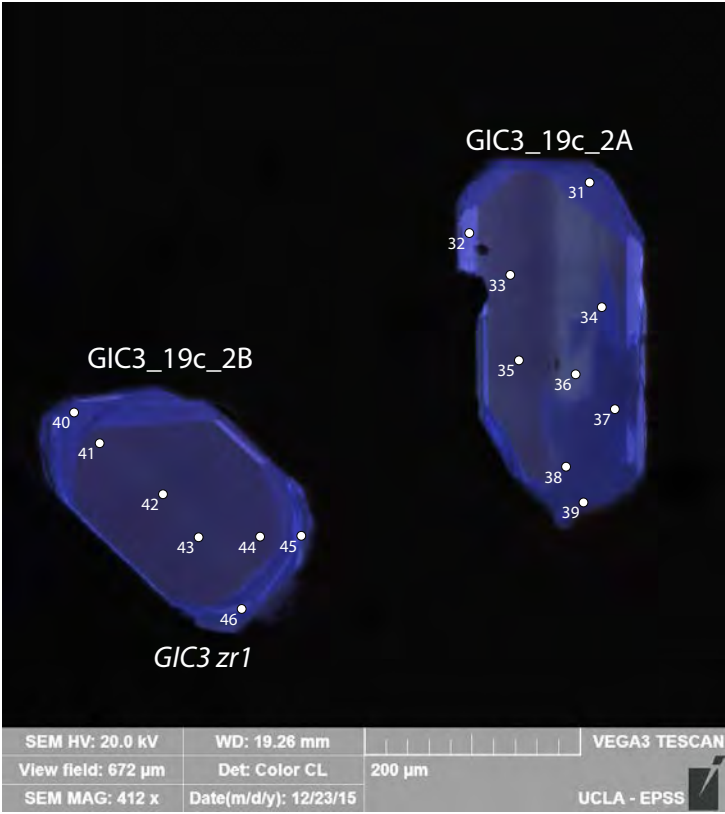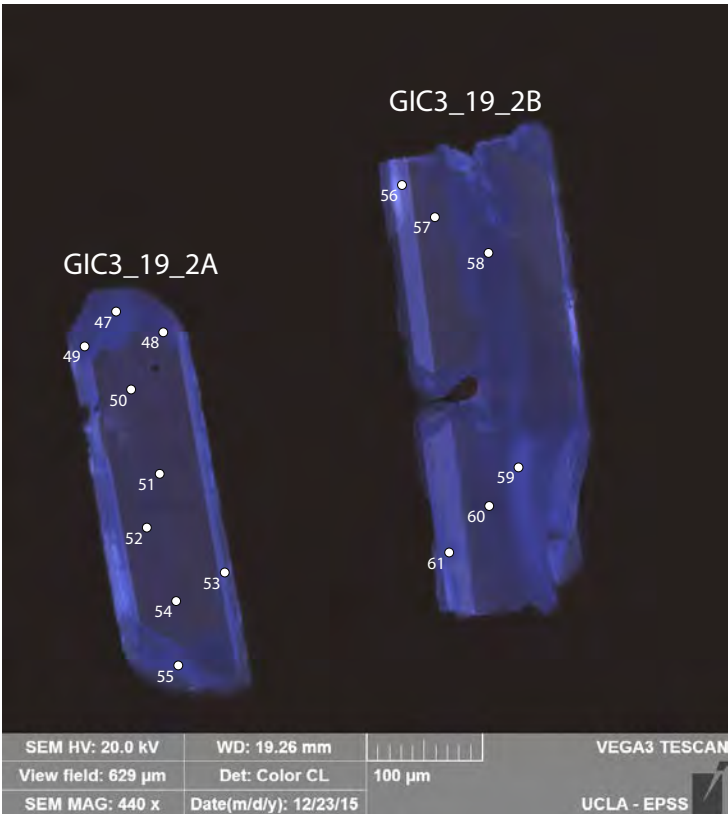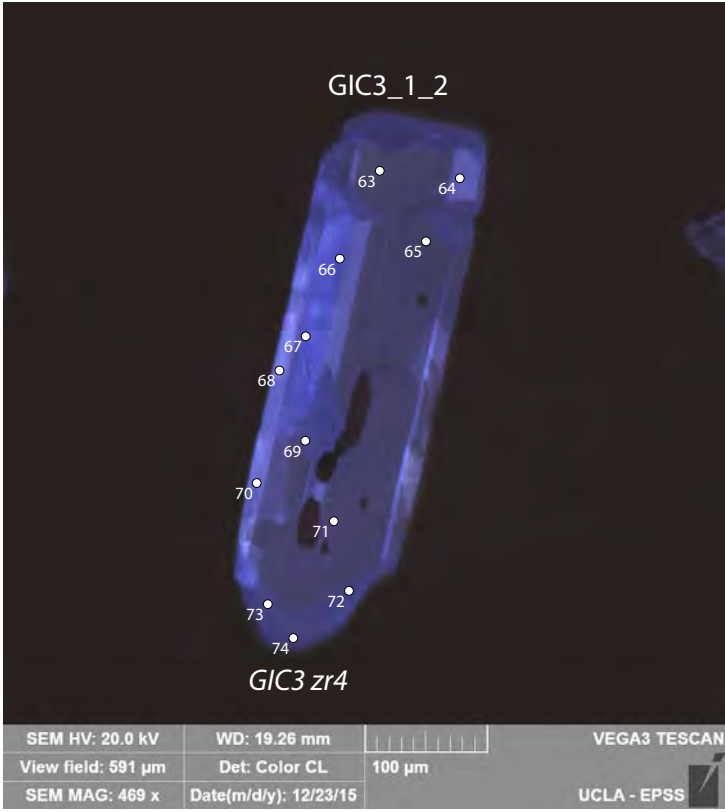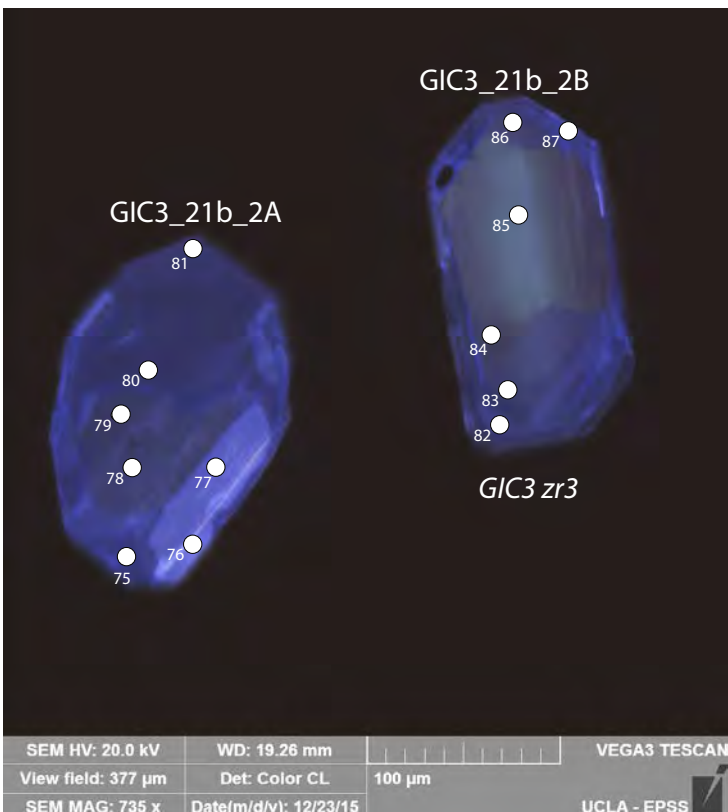



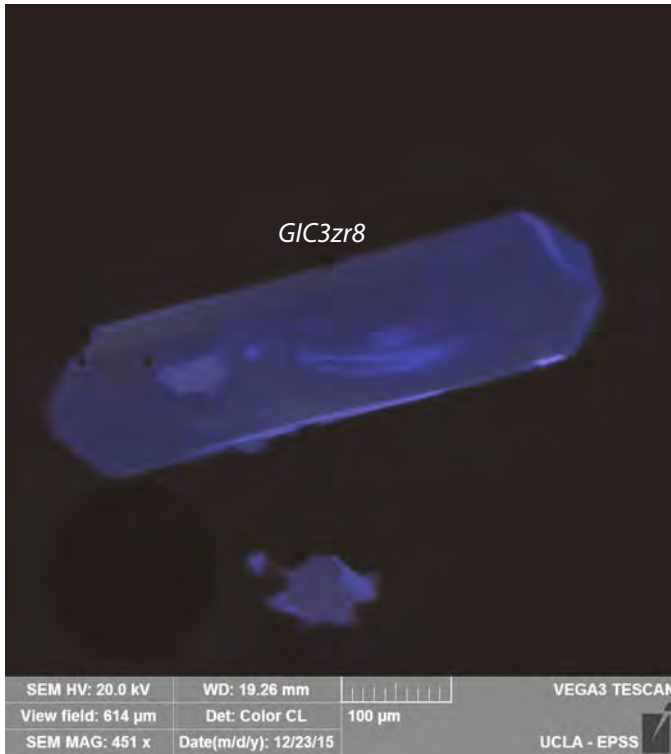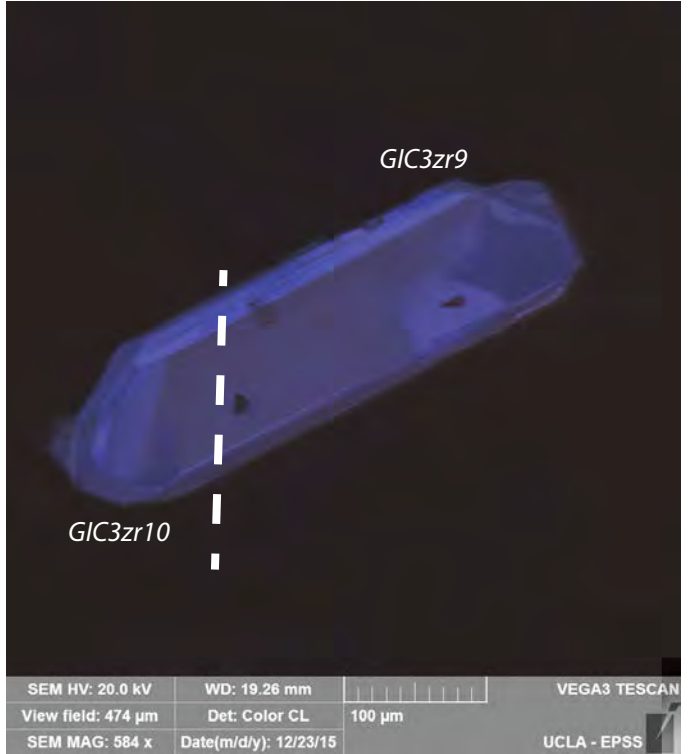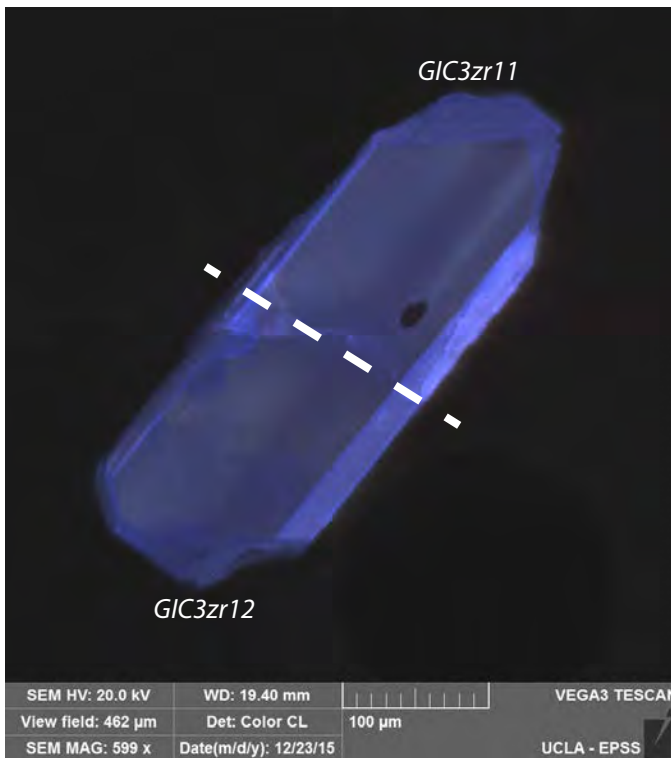

# Felsic segregation sample BRGIC10

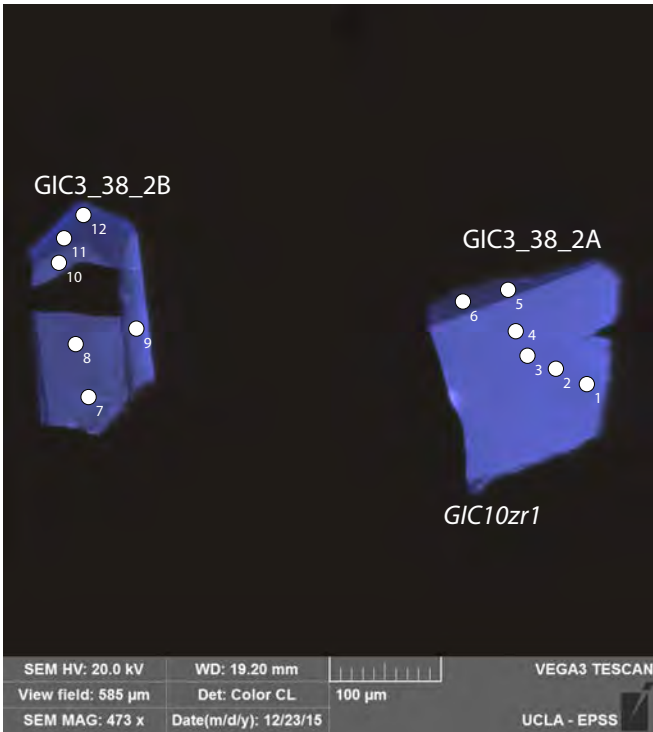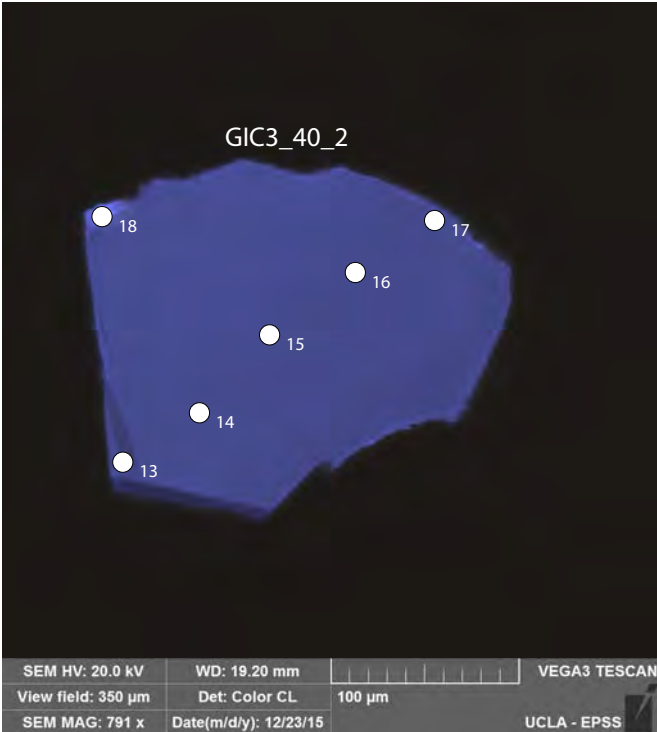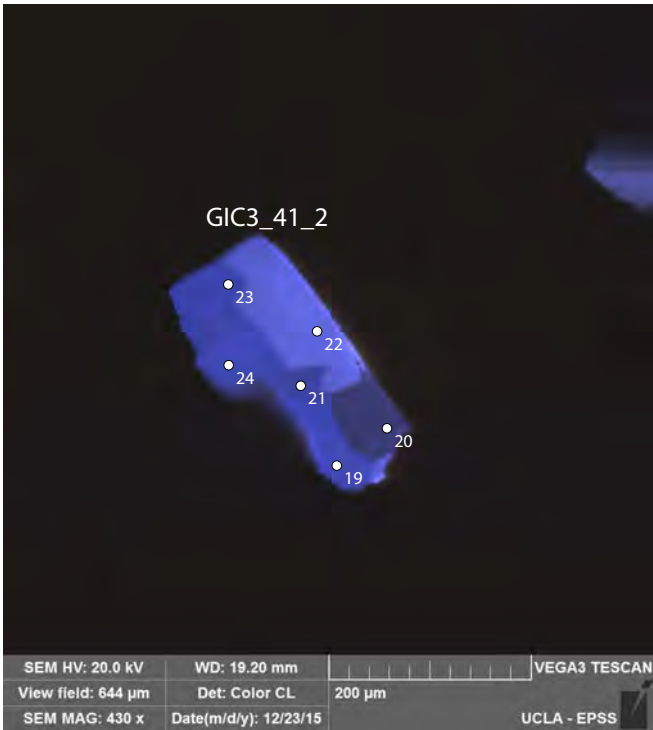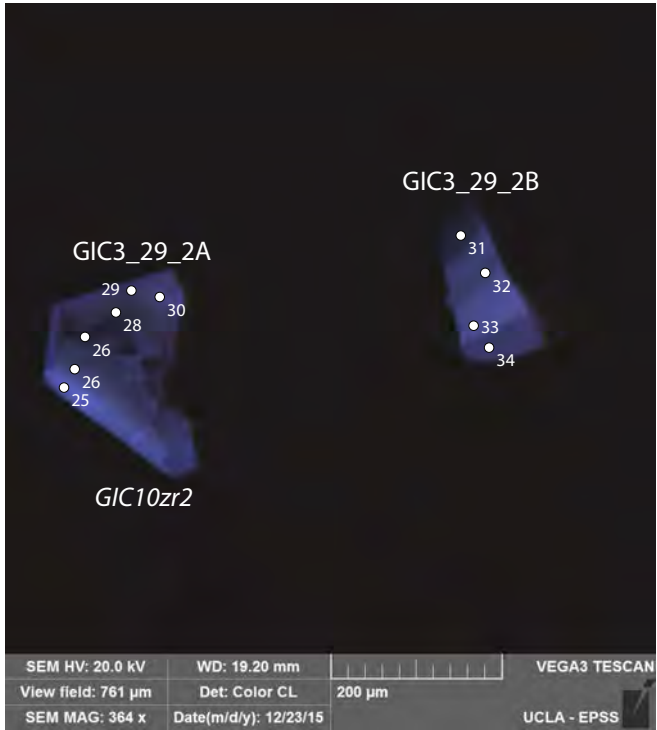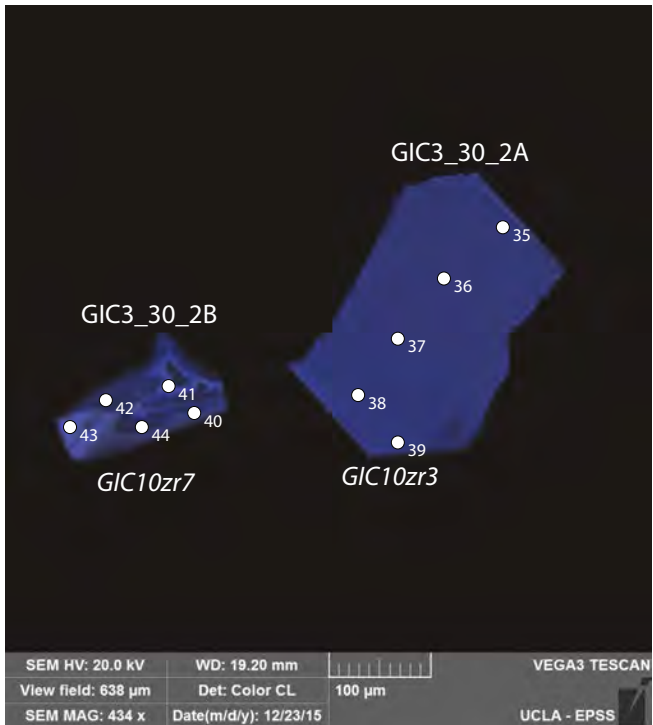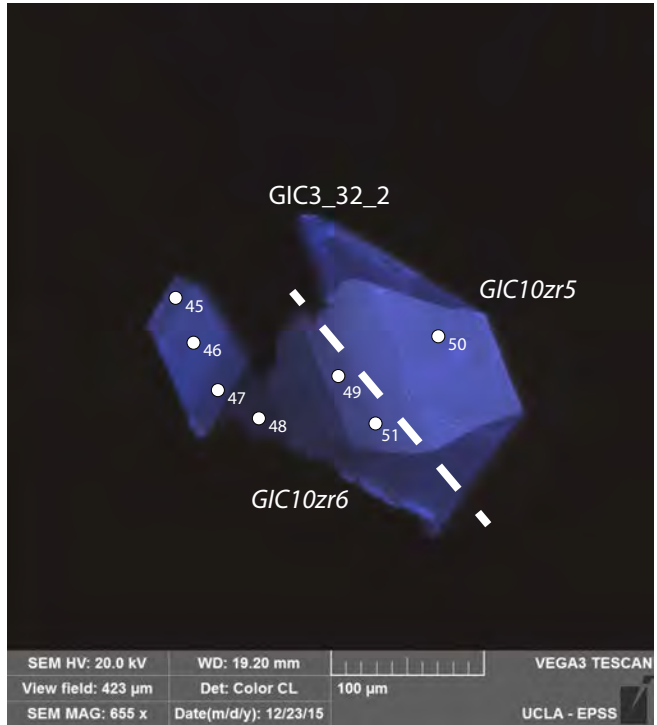



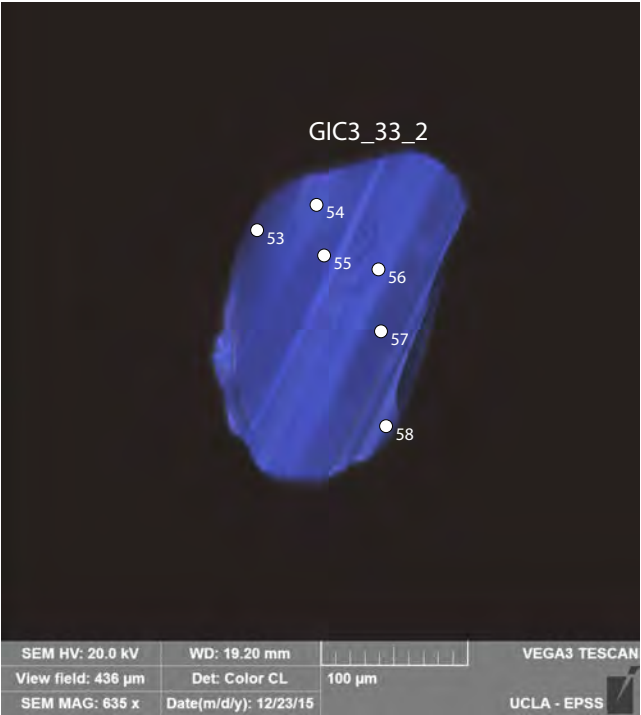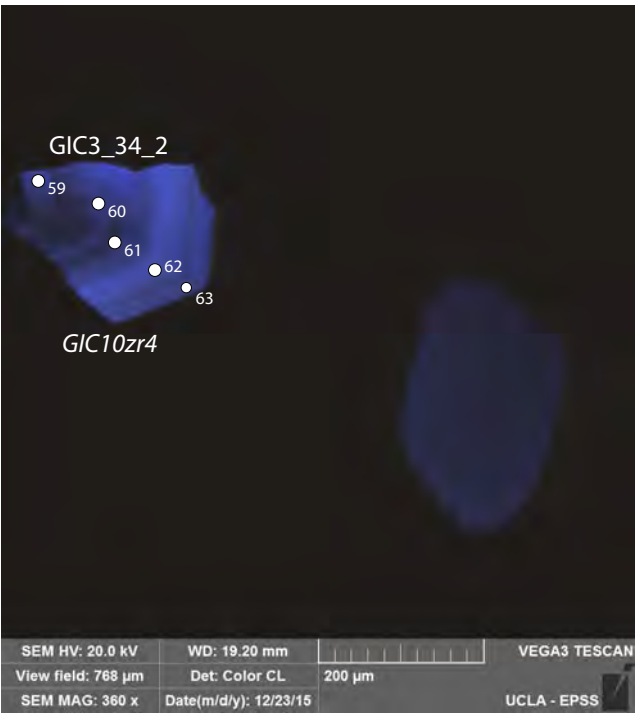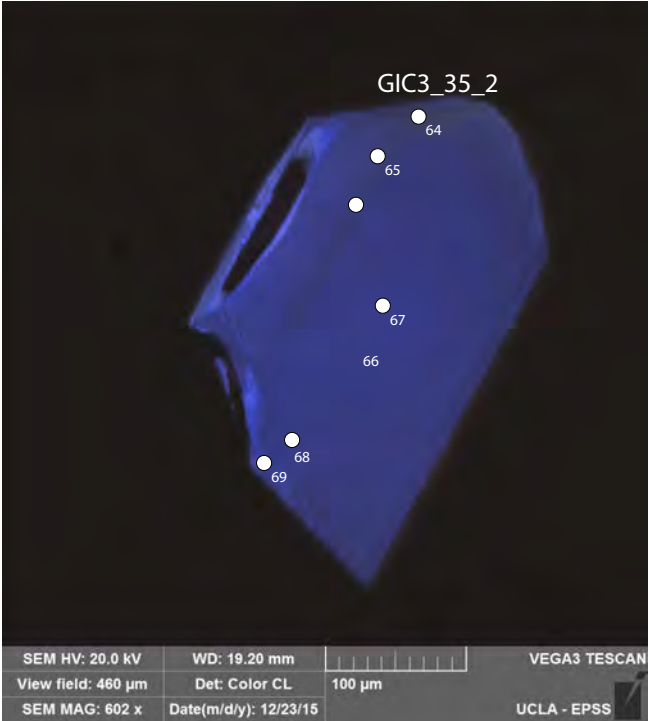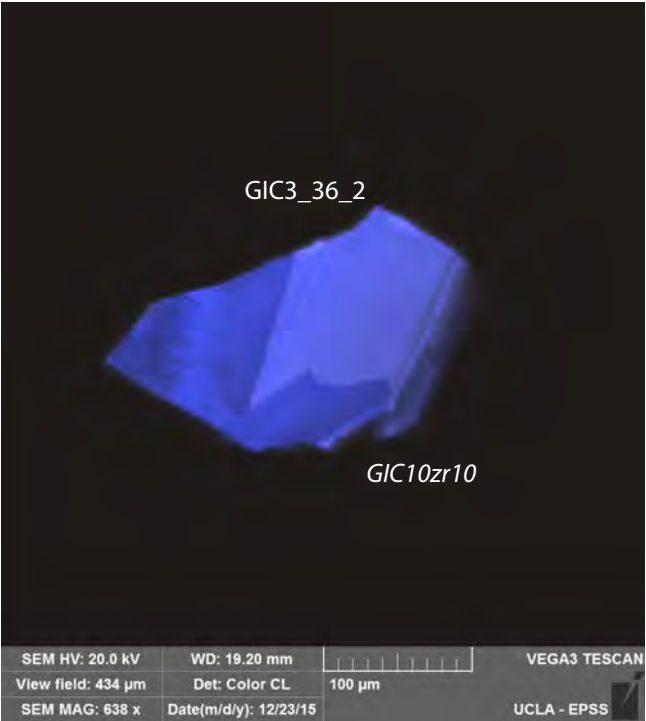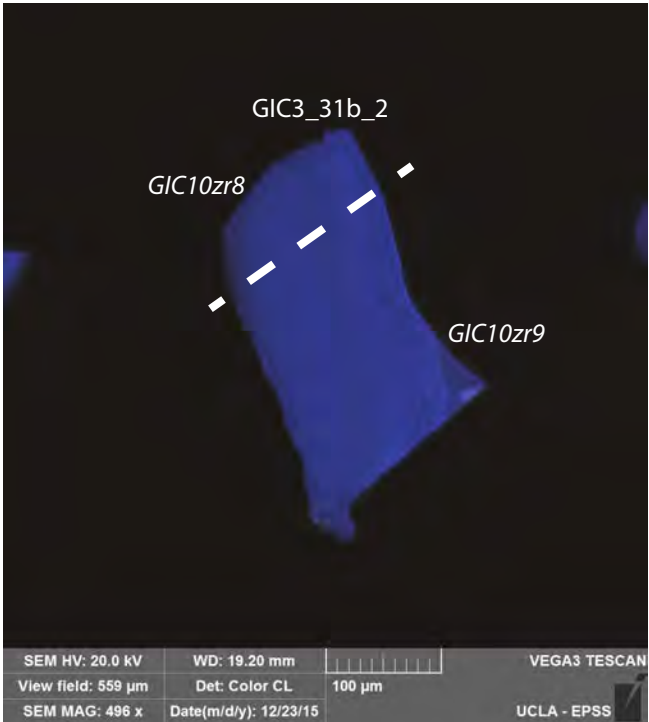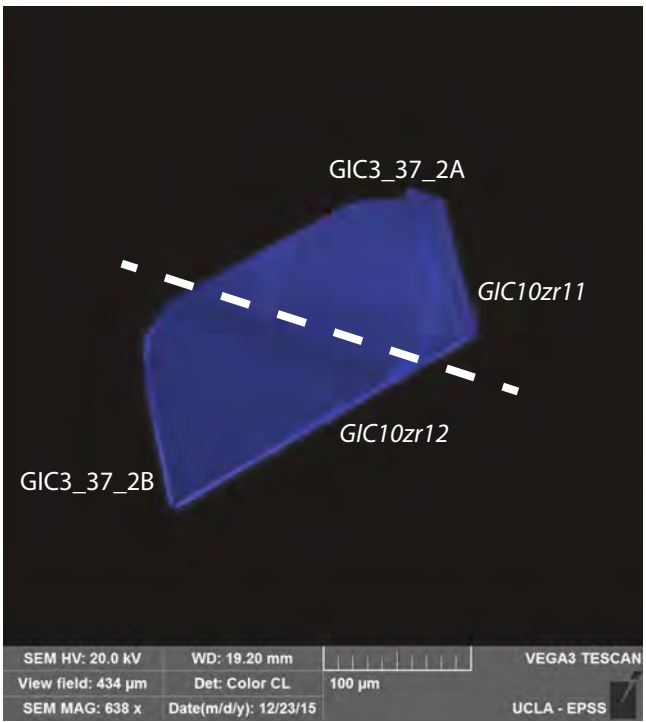

# Upper gabbro sample BRGIC10D

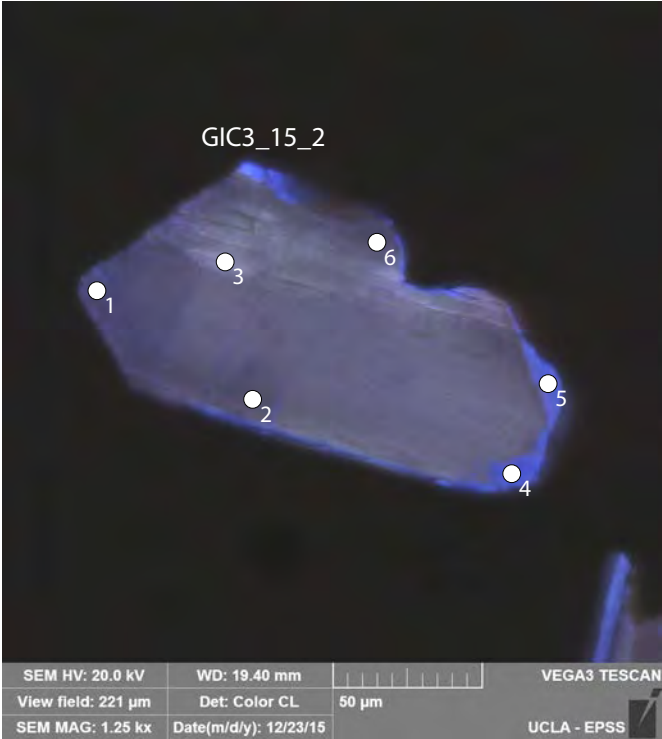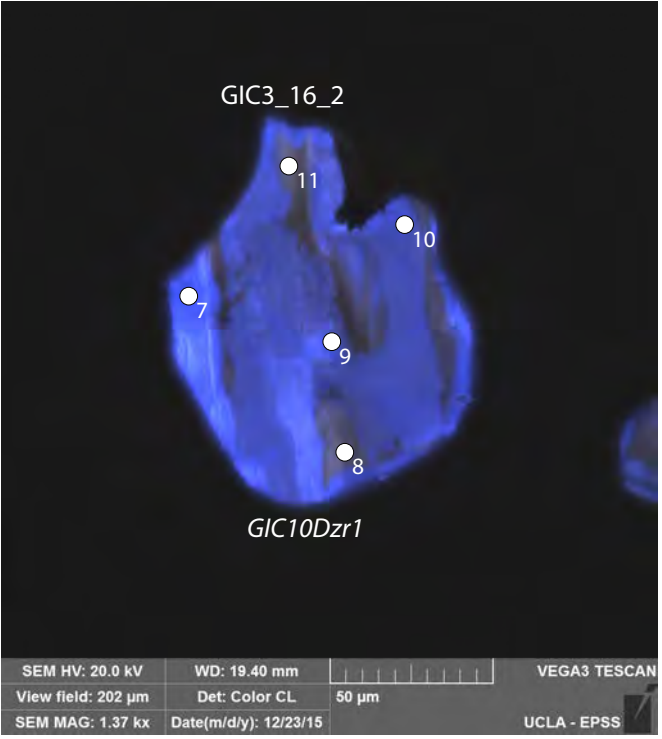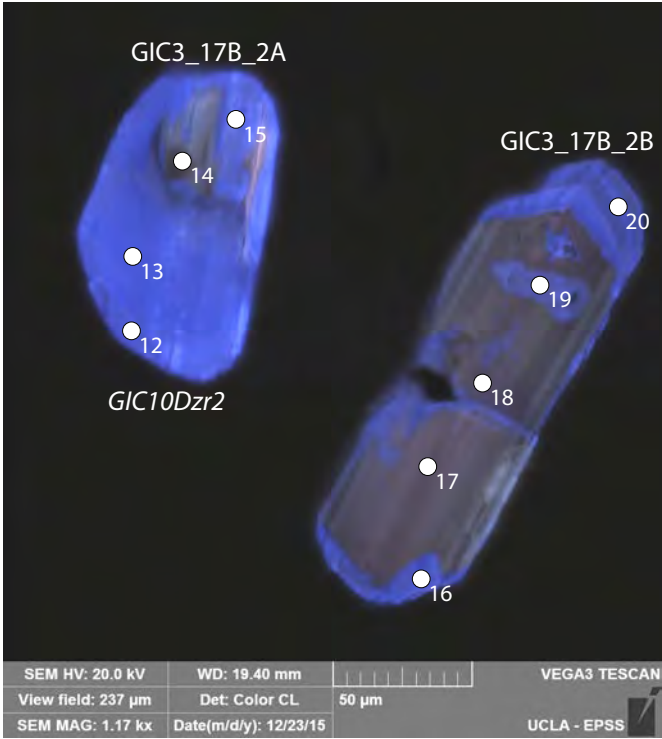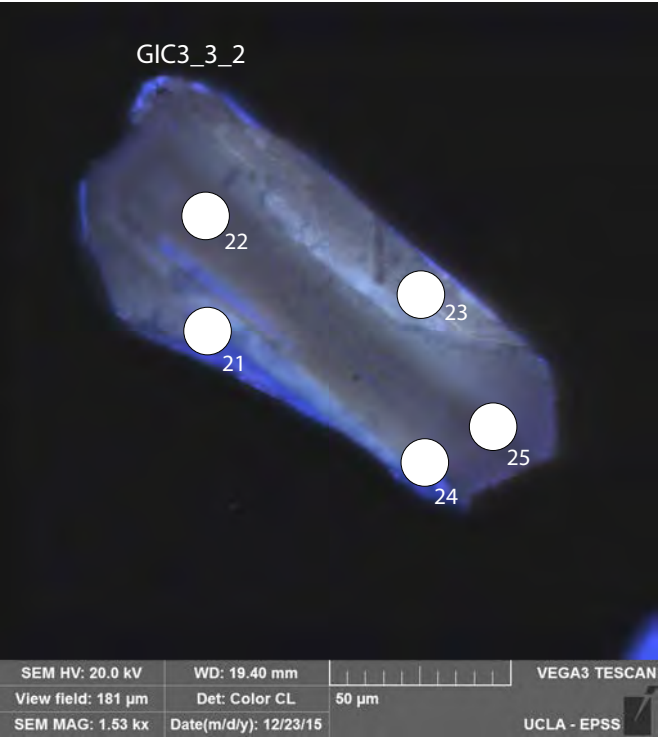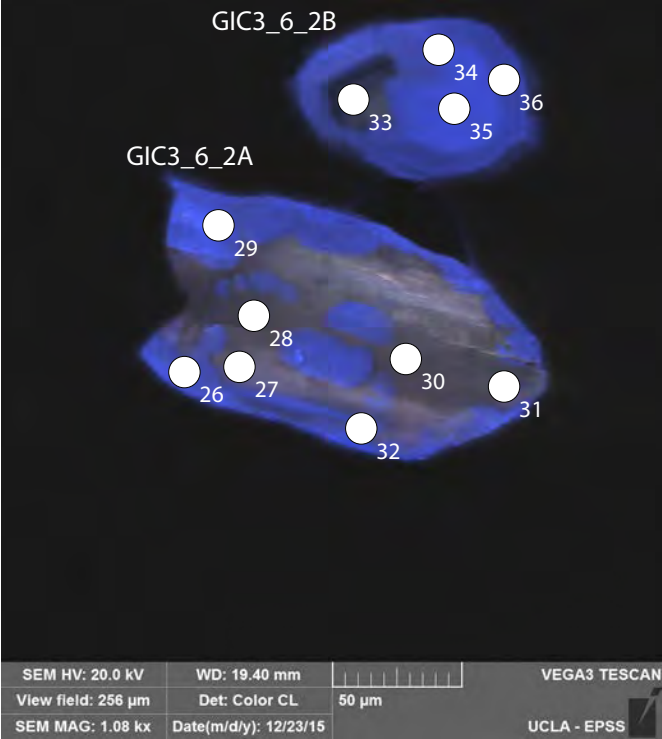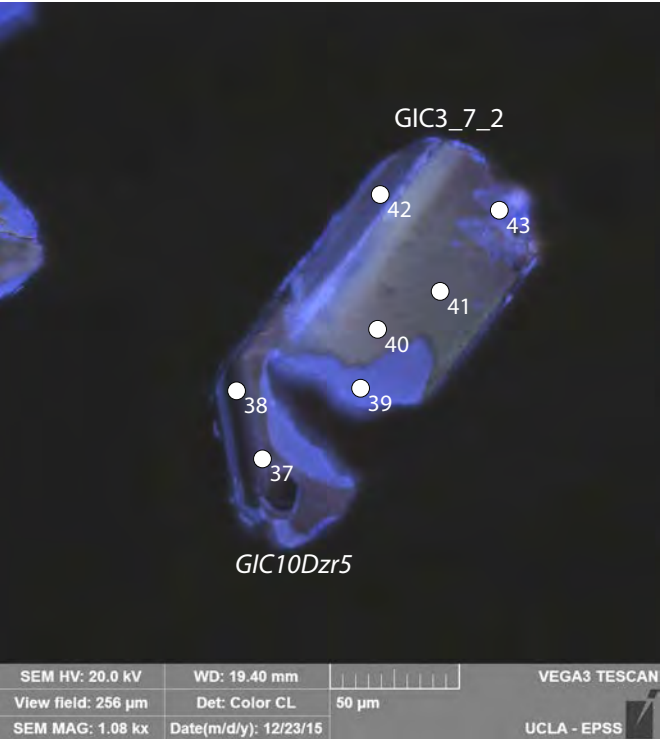

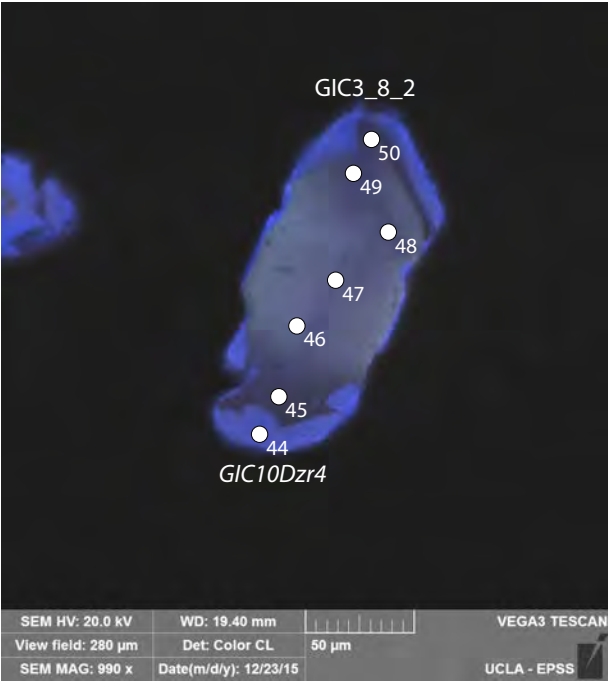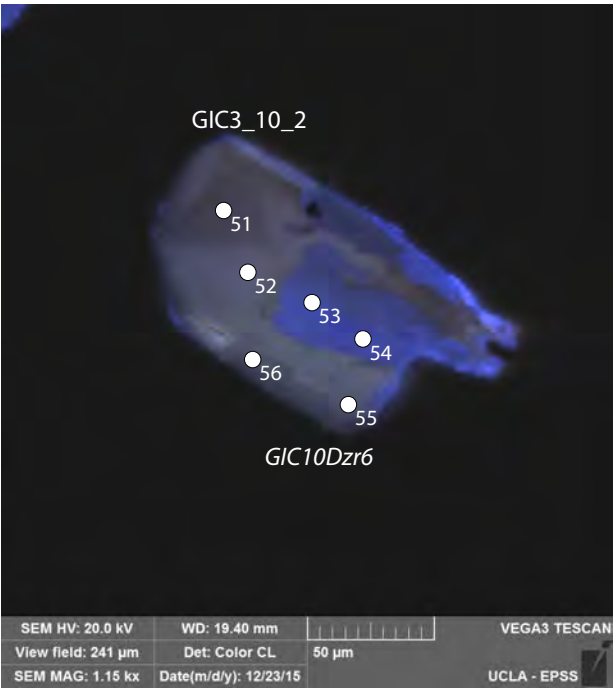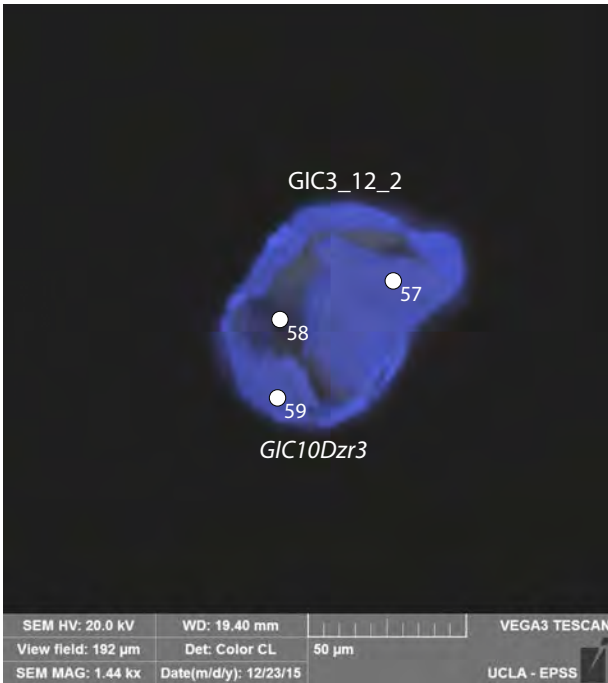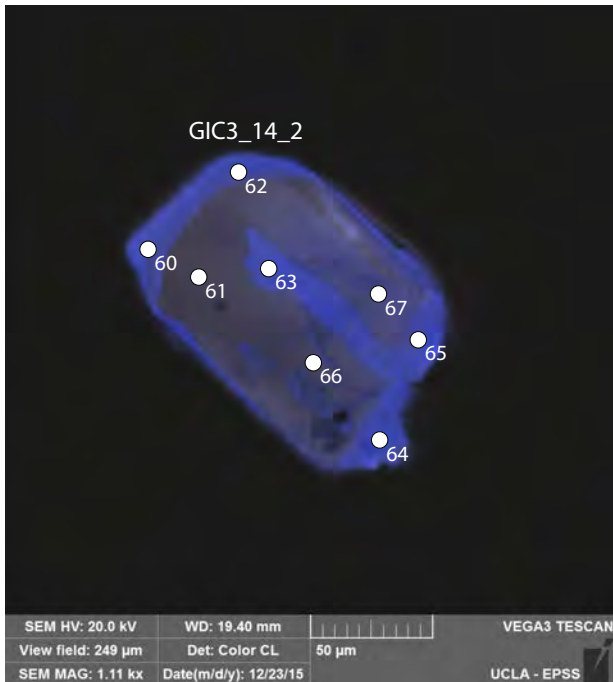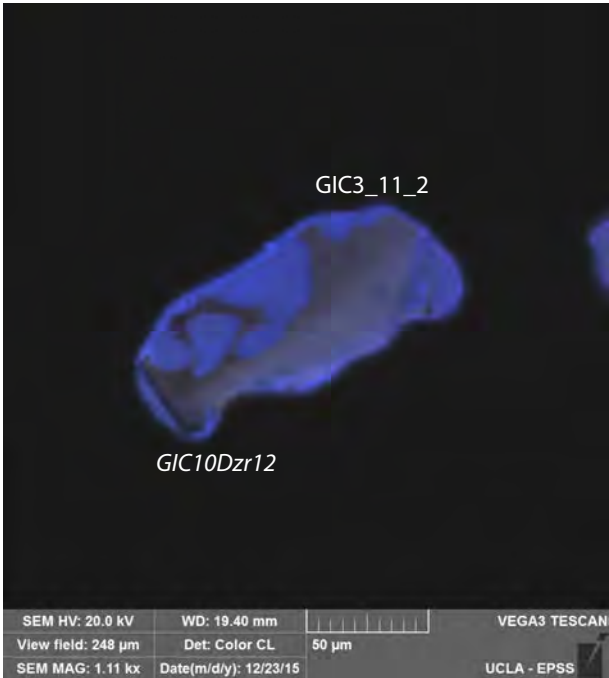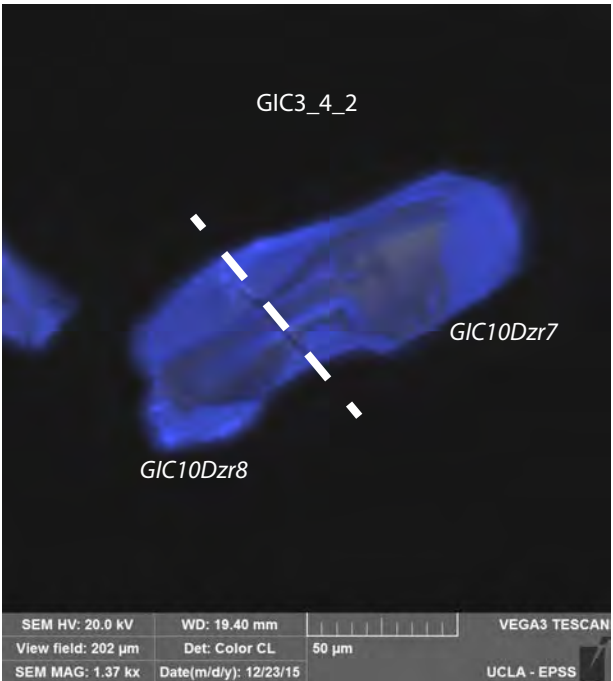



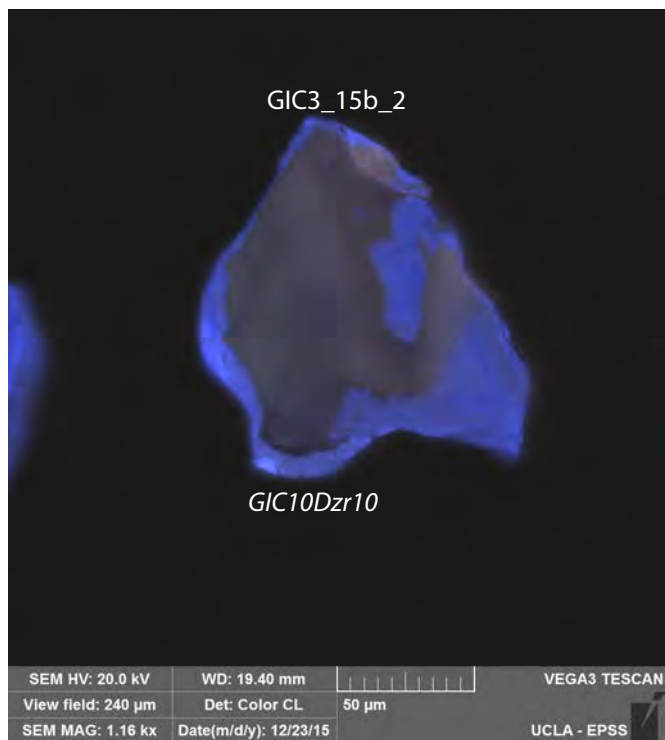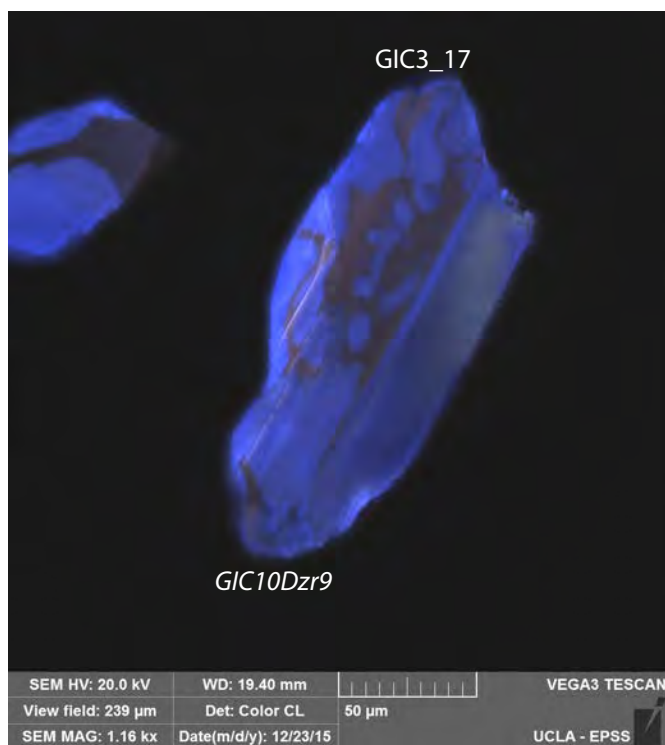

Lower gabbro sample BRGIC13

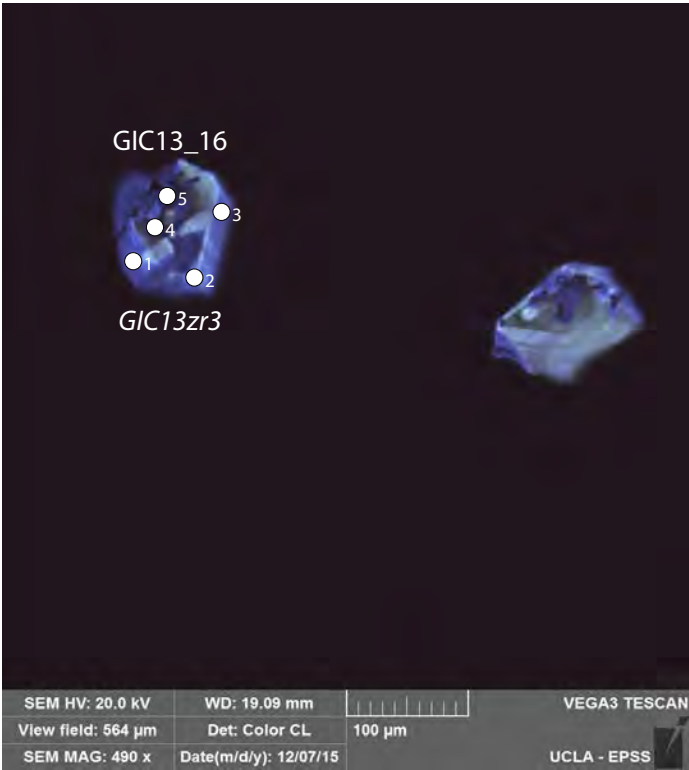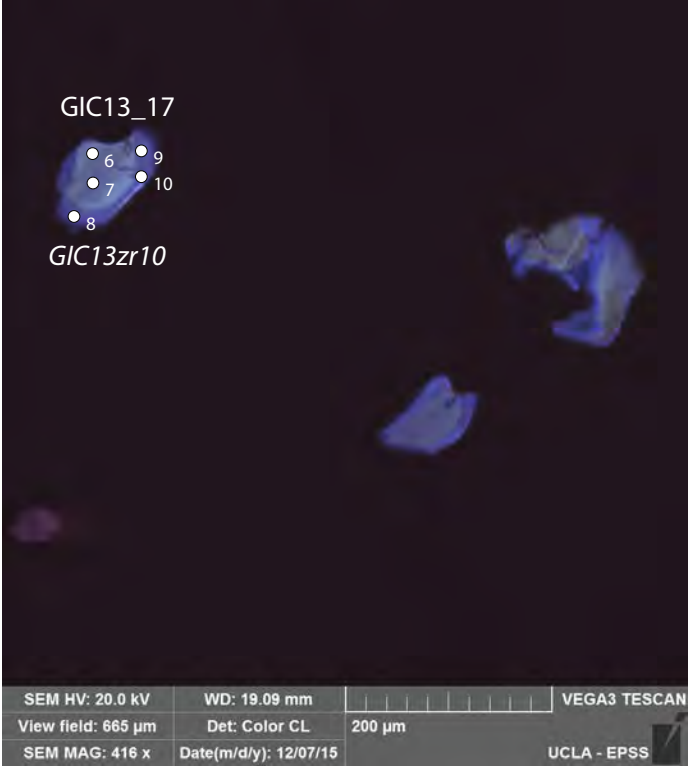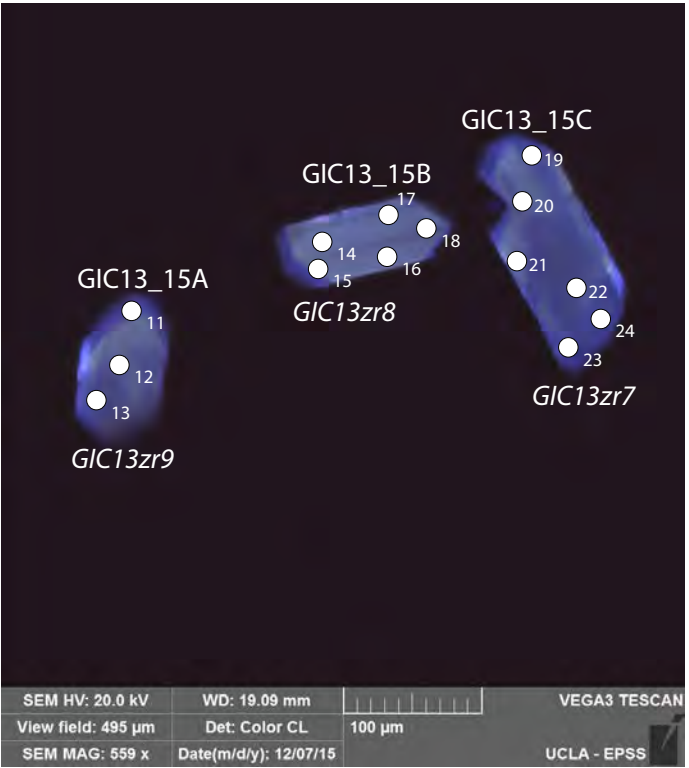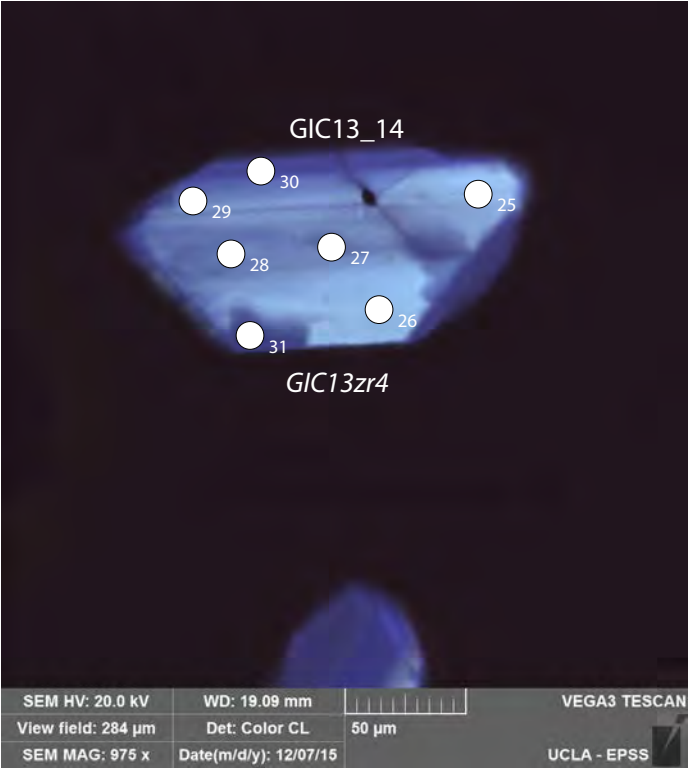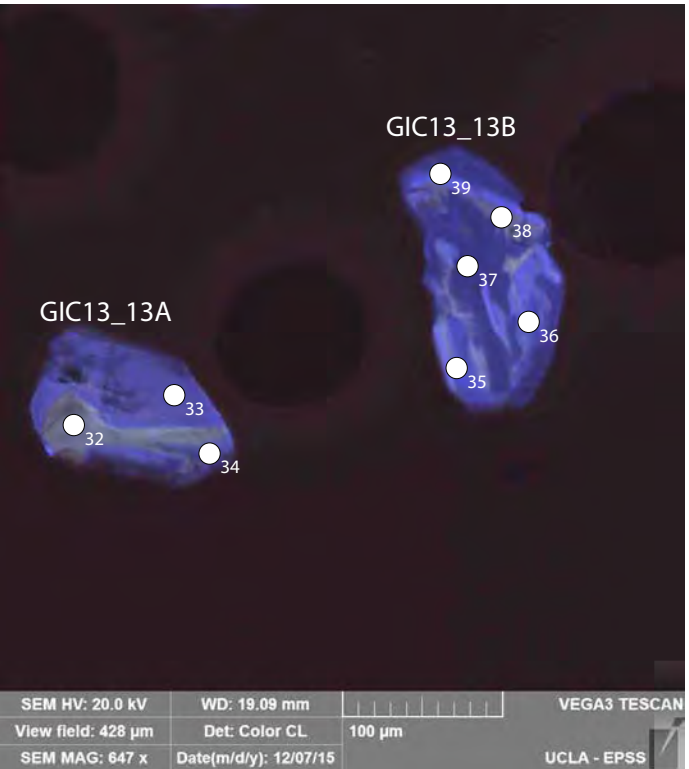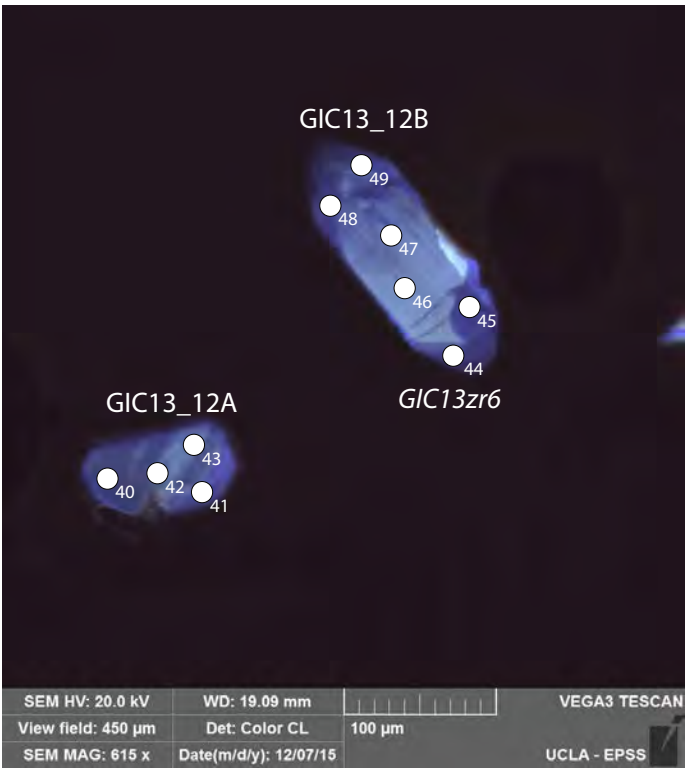

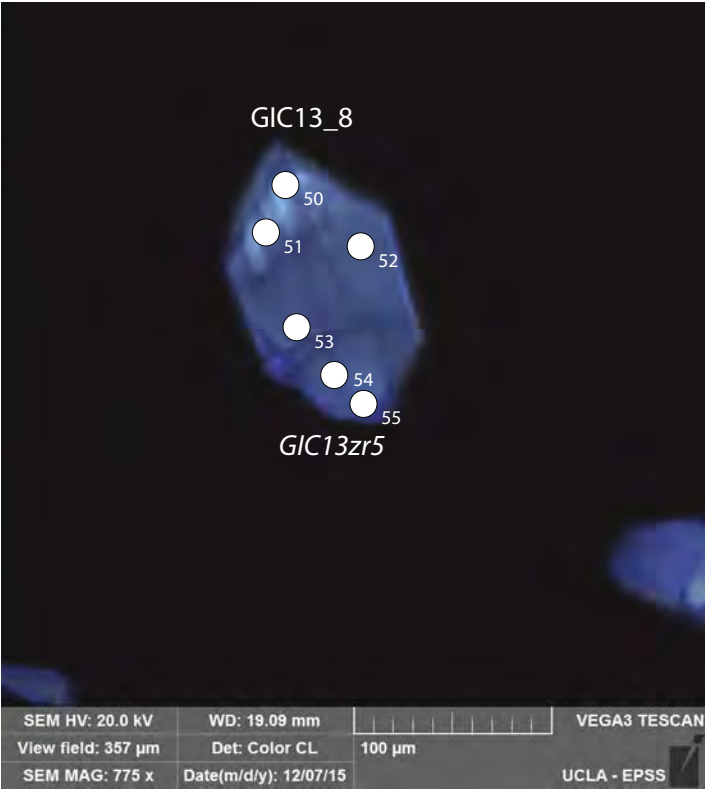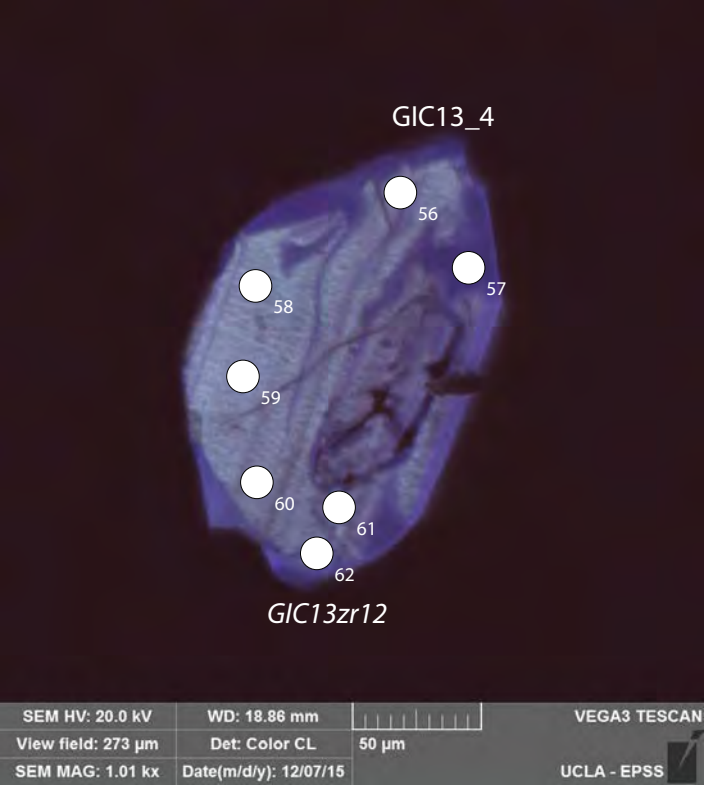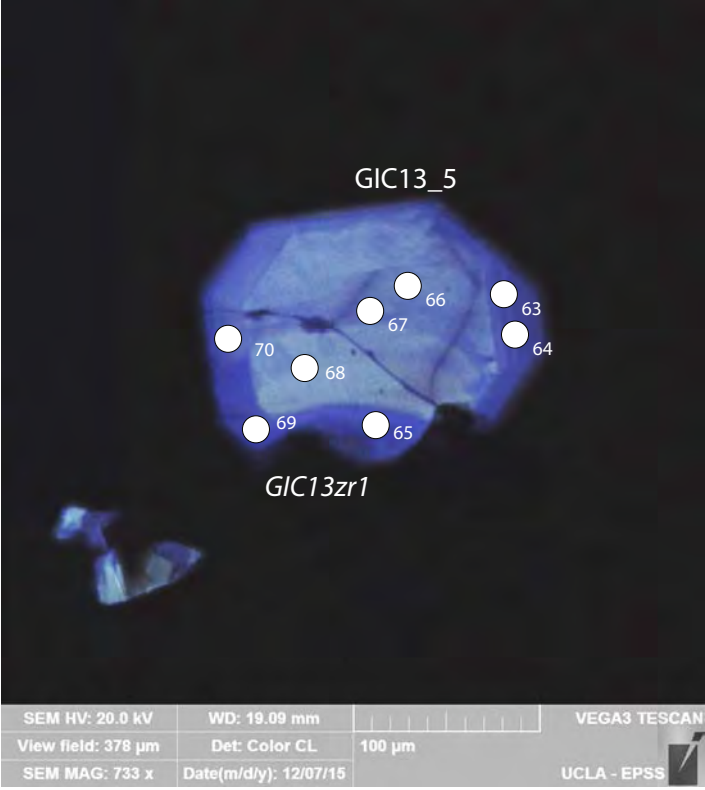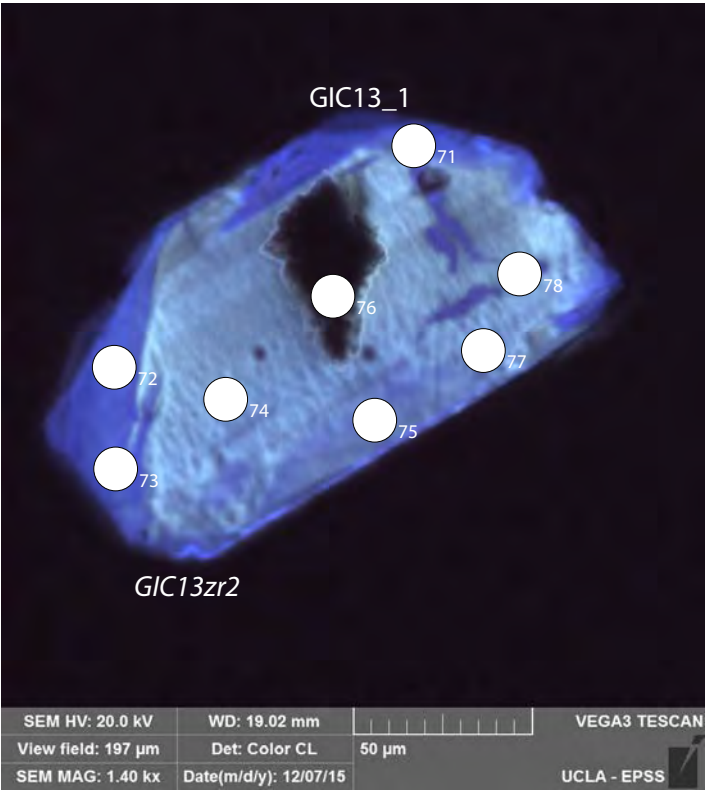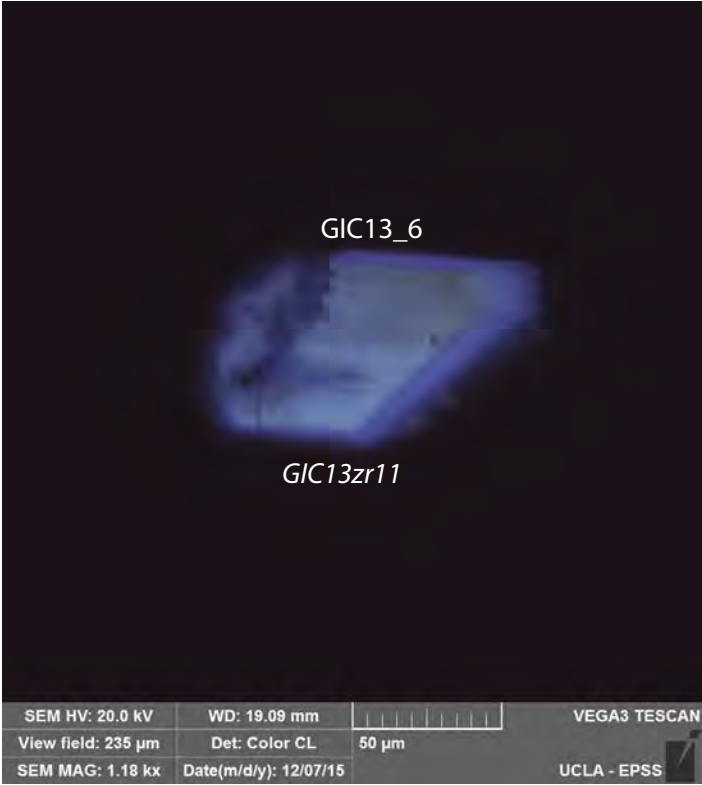

Supplement: Supplementary file 2 [file 2]
