# Supplementary material
Source: publisher figshare collection journal article supplement (https://gsapubs.figshare.com/articles/dataset/_/25444633)
Supplement: Supplementary file 1 [file 2]

## Sheet: WR Sr-Nd isotopes & majors
Table S1: Whole rock Sr and Nd isotope composition and major element composition					Ratschbacher, B.C., Ardill, K., Keller, C.B., Schoene, B., Paterson, S.R., Putirka, K.D., Lackey, J.S., and Paige, M.L., 2024, Multi-scale, open-system magmatic and sub-solidus processes contribute to the chemical and isotopic characteristics of the Jurassic Guadalupe Igneous Complex, Sierra Nevada, California, USA: Geosphere, v. 20, https://doi.org/10.1130/GES02689.1.
Sample	Rock type	Map unit	Latitude	Longitude	Sm	Nd	Sm/Nd	147Sm/144Nd	143Nd/144Nd(0)	143Nd/144Nd( t)	error	e(Nd)0	e(Nd)t	error		Rb	Sr	Rb/Sr	87Rb/86Sr	87Sr/86Sr (0)	Sri	error		Age		SiO2	TiO2	Al2O3	Fe2O3	MnO	MgO	CaO	Na2O	K2O	P2O5	Total
BR61C10	Gabbro	Gabbro Upper	37.4094	-120.119	2.13859	8.35975	0.25582	0.154675	0.512998	0.512846	5.12846e-06	7.02	7.0225	0.23683		5.01738	250.652	0.020017	0.057533	0.702798	0.702676	7.73078e-06		149		50.4651	1.26644	16.565	8.65233	0.162104	8.26733	11.5905	2.55315	0.192499	0.121578	99.8361
KP-GIC-G1	Gabbro	Gabbro Upper	NA		2.764	8.90633	0.310372	0.187656	0.512955	0.512771	8.20433e-06	6.1837	6.35989	0.267732		6.387	206.297	0.031	0.089	0.703442	0.70325	9.14475e-06		149		50.8	1.06	16.5	8.84	0.14	8.32	11.46	2.37	0.31	0.1	100
GP-GIC-1-2	Felsic segregation	Gabbro Upper	37.409	-120.141	0.713	3.627	0.196644	0.118887	0.512678	0.512561	9.2261e-06	0.780278	2.27091	0.280035		140.985	58.761	2.399	6.907	0.718879	0.70407	1.15021e-05		149		74.1	0.06	14.3	0.7	0.01	0.27	1.21	2.4	7.02	0.01	100
BRGIC10-B	Felsic segregation	Gabbro Upper	37.4094	-120.119	1.07497	4.70171	0.228633	0.138229	0.512747	0.512611	6.15134e-06	2.14	2.12626	0.245839		99.8006	80.4846	1.24	3.56694	0.711353	0.703798	7.11353e-06		149		66.68	0.358	16.81	2.64	0.037	1.18	4.54	4.74	1.77	0.1	99.49
MD 16.2	Meladiorite	Meladiorite	37.44	-120.09	4.039	16.118	0.250579	0.1515	0.512825	0.512676	6.15212e-06	3.6478	4.51519	0.24587		30.885	217.288	0.142	0.409	0.704451	0.70357	1.26801e-05		149		63.8	0.78	15.9	5.04	0.07	2.24	5.03	3.98	2.38	0.15	99.4
G 13.5	Granophyre	Meladiorite	37.44	-120.09	6.111	21.594	0.282014	0.17111	0.51283	0.512662	5.12662e-06	3.74533	4.23735	0.236745		41.229	97.624	0.422	1.221	0.705307	0.70269	7.05307e-06		149		66.2	1.31	15	3.92	0.06	1.06	3.87	7.74	0.26	0.29	99.8
KP-GIC-AD1	Mingled zone (enclave)	Mingled Zone - enclave	37.47	-120.074	5.327	21.23	0.2509	0.151696	0.512886	0.512737	7.69106e-06	4.83772	5.70181	0.261858		56.053	207.806	0.27	0.775	0.705586	0.70392	1.34061e-05		149		60.2	1.47	15.7	8.11	0.14	3.28	6.15	3.41	2.24	0.26	100.9
KP-GIC-AH1	Mingled zone (granite host)	Mingled Zone - Host	37.47	-120.074	2.922	14.565	0.20059	0.121276	0.512716	0.512597	5.12597e-06	1.52154	2.96672	0.236715		112.945	71.65	1.576	4.535	0.712286	0.70256	9.25972e-06		149		73.8	0.22	13.4	1.87	0.02	0.42	1.3	3.21	4.73	0.03	99
Smith 25	Granophyre	Granophyre	37.4036	-120.019	6.66868	27.5627	0.241946	0.146282	0.512862	0.512718	8.7162e-06	4.37	5.31844	0.2738		93.425	76.404	1.223	3.518	0.712188	0.70464	5.6975e-06		149		74.38	0.23	13.44	1.76	0.03	0.22	1.21	3.8	4.6	0.024	99.7
Smith 27B	Granophyre	Granophyre	37.413	-120.013	7.0232	28.011	0.25073	0.152193	0.512877	0.512727	6.15272e-06	4.662	5.49724	0.245894		113.375	44.184	2.566	7.387	0.719308	0.70347	1.43862e-05		149		74.4	0.26	13.7	1.9	0.02	0.18	0.7	4.21	4.23	0.04	99.6
Smith 29-4	Tonalite	Granophyre	37.419	-120.012	7.508	28.763	0.261041	0.157828	0.512898	0.512742	7.69113e-06	5.072	5.79845	0.26186		1.654	200.26	0.008	0.024	0.705734	0.70568	1.90548e-05		149		65.8	1	15.2	4.66	0.09	1.59	4.62	6.42	0.19	0.37	99.9
KP-GIC-G1-2	Granophyre	Granophyre	37.47	-120.046	5.06	20.562	0.246086	0.148779	0.512706	0.51256	6.15072e-06	1.32647	2.24508	0.245814		1.57	135.588	0.012	0.033	0.706941	0.70687	1.13111e-05		149		74.42	0.51	15.11	1.35	0.01	0.34	1.27	6.85	0.12	0.01	100
Smith 29	Tonalite	Granophyre	37.419	-120.012	10.0727	38.7306	0.26007	0.157236	0.51276	0.512605	4.61344e-06	2.38	3.11688	0.232671		11.279	223.805	0.05	0.145	0.706168	0.70586	1.12987e-05		149		64.49	2.18	14.84	5.66	0.11	1.46	4.68	5.76	0.48	0.413	100.1
KP-GIC-R1	Rhyolite	Rhyolite	37.47	-120.042	6.74	33.932	0.19864	0.120074	0.511982	0.511864	5.11864e-06	-12.7966	-11.3338	0.236377		34.075	432.302	0.079	0.227	0.708296	0.70781	9.91614e-06		149		69.2	0.67	14.6	2.65	0.02	1.77	1.76	4.15	1.33	0.23	96.4
Hornitos pluton sample
KP-H-1	Gabbro	Hornitos pluton	NA		0.885	3	0.295	0.178475	0.512959	0.512784	6.66619e-06	6.26173	6.61371	0.250956		4.183	78.076	0.054	0.154	0.703892	0.70356	1.33739e-05		149		49.9	0.32	7.9	10.92	0.23	10.38	19.5	1.28	0.26	0.06	100.8
22	Granite	Hornitos pluton	37.5119	-120.233	3.65581	17.1532	0.213127	0.128861	0.512986	0.51286	6.66717e-06	6.788	8.09038	0.250993		0.493	188.132	0.003	0.008	0.703836	0.70382	9.14987e-06		149		51.8	0.99	17.2	10.43	0.29	6.49	9.26	3.7	0.14	0.17	100.5
Western Metamoprhic Belt samples
Rash J-2-8	Hyp mafic porphyry	Calaveras Complex	37.5986	-120.046	3.002	12.115	0.247792	0.15041	0.512911	0.512754	7.17856e-06	5.335	6.03209	0.256267		11.706	283.99	0.041	0.118	0.704558	0.70429	7.04558e-06		NA		51.2	0.4	13	9.91	0.22	10.11	11.95	1.47	1.4	0.21	99.9
Rash J-3-1	greenstone	Calaveras Complex	37.58	-119.953	3.3103	12.5115	0.264579	0.159967	0.512902	0.512693	9.74116e-06	5.15	4.83492	0.286637		0.582	339.29	0.002	0.005	0.704569	0.70455	7.75026e-06		NA		55	0.87	15.3	11.22	0.21	5.29	8.11	3.9	0.14	0.18	100.2
Rash J-7-1	voclanic rock	Penon Blanco	37.5062	-120.101	3.78503	17.4058	0.217458	0.131474	0.512799	0.512627	1.07652e-05	3.141	3.55223	0.300232		26.489	342.495	0.077	0.222	0.705289	0.70466	8.46347e-06		200		61.4	0.43	17.2	7.29	0.09	3.67	6.12	2.61	1.19	0.13	100.1
Rash J-8-3	greenstone	Gopher Ridge	37.488	-120.263	2.67375	7.83691	0.341174	0.206284	0.513044	0.512828	6.15394e-06	7.92	7.47679	0.245943		0.196	163.812	0.001	0.003	0.704512	0.7045	9.15866e-06		160		49.9	1.81	14.9	15	0.4	4.93	8.79	4.19	0.09	0.27	100.2
Rash J-8-4	amphibolite	Gopher Ridge	37.496	-120.246	4.14562	12.9006	0.321351	0.194303	0.513142	0.512939	6.15526e-06	9.831	9.63384	0.245996		0.249	182.89	0.001	0.004	0.702936	0.70293	1.1247e-05		160		50.4	1.66	15.9	10.48	0.18	7.4	10.68	3.07	0.08	0.16	100
NA - Not available
Errors for the Sr and Nd isotopic ratios and e(Nd)t and Sri are given at the 2σ level
The ɛNd(i) values for GIC samples were calculated using (143Nd/144Nd)CHUR(149Ma)=0.512638+/-0.000011

## Sheet: WR oxygen isotopes
Table S2: Whole rock oxygen isotope composition and major and selected trace element composition
Sample	rock type	map unit		δ18O	2σ		SiO2	TiO2	Al2O3	Fe2O3	FeO	MnO	MgO	CaO	Na2O	K2O	LOI	Total		Ba	Cu	Sr	V	Y	Zn
140-50A1	strongly sheared gneiss	Mariposa Formation		5.95	0.019
140-50A2	strongly sheared gneiss	Mariposa Formation		4.313	0.008
140-50B	strongly sheared gneiss	Mariposa Formation		4.89	0.008
140-990	slate	Mariposa Formation		12.12	0.011
SH-24	Gabbro	Lower Gabbro		5.466	0.021		47	0.22	19.13	0.97	4.92	0.1	10.62	12.74	1.98	0.09	0.28	98.26		10	50	176	115	14	38
SH-26	Gabbro	Lower Gabbro		5.516	0.021		50	0.39	17.69	1.01	5.17	0.12	9.38	13.08	2.47	0.12	0.15	99.18		18	52	184	168	19	52
SH-33	Gabbro	Lower Gabbro		6.431	0.012		52	0.5	16.87	0.79	4.04	0.11	7.25	14.69	2.66	0.11	0.34	98.88		23	34	189	286	18	42
SH-34	Gabbro	Lower Gabbro		5.993	0.02		48	0.27	19.86	0.91	4.63	0.1	9.85	12.7	2.29	0.1	0.42	99.15		14	55	172	101	16	56
SH-3	Gabbro	Lower Gabbro		5.559	0.022		47	0.22	21.91	0.89	4.54	0.09	10.17	12.24	2.07	0.1	0.44	99.51		9	48	223	74	15	31
SH-4	Gabbro	Lower Gabbro		5.826	0.009		49	0.32	21.03	0.8	4.06	0.09	8.38	13.67	2.35	0.13	0.39	99.91		16	64	234	121	18	37
SH-5	Gabbro	Lower Gabbro		5.67	0.013		47	0.24	20.55	1	5.09	0.1	11.21	11.54	2.24	0.12	0.3	99.81		11	50	231	84	13	44
SH-6	Gabbro	Lower Gabbro		6.262	0.014		49	0.4	18.22	0.99	5.03	0.11	9.6	12.44	2.56	0.09	0.28	98.53		13	77	210	142	15	45
SH-10	Gabbro	Lower Gabbro		6.066	0.018		50	0.47	16.86	0.93	4.72	0.12	8.7	14.05	2.49	0.09	0.2	99.08		24	44	200	208	20	35
SH-11	Gabbro	Lower Gabbro		5.955	0.015		48	0.56	16.36	1.41	7.2	0.15	11.41	10.79	2.53	0.13	0.85	99.52		27	52	190	168	19	64
SH-12	Gabbro	Lower Gabbro		6.406	0.023		50	0.43	17.24	0.96	4.87	0.12	8.6	13.69	2.5	0.11	0.07	98.39		19	61	194	205	17	43
SH-13	Gabbro	Lower Gabbro		6.609	0.016		50	0.4	17.6	1.05	5.36	0.12	9.38	12.61	2.59	0.14	0.07	99.22		27	44	202	177	17	48
SH-14	Gabbro	Lower Gabbro		6.051	0.022		51	0.52	16.94	0.88	4.47	0.11	8.37	14.18	2.58	0.13	0.3	99.7		29	44	204	236	18	44
SH-15	Gabbro	Lower Gabbro		5.85	0.043		50	0.51	16.97	1.18	6.03	0.13	8.73	11.62	2.9	0.13	0.09	98		28	39	210	182	15	54
SH-16	Gabbro	Lower Gabbro		6.089	0.062		50	0.46	18.26	1.17	5.96	0.13	8.44	11.66	2.79	0.18	0.06	99.54		66	36	222	158	18	56
SH-7	Gabbro	Lower Gabbro		5.889	0.031		50	0.36	17.72	1.07	5.46	0.12	8.36	12.24	2.86	0.1	0.24	98.29		23	53	207	175	16	45
SH-8	Gabbro	Lower Gabbro		6.097	0.028		50	0.88	15.95	1.18	6.01	0.14	8.1	12.7	2.69	0.15	0.16	98.12		34	44	186	269	22	53
SH-9	Gabbro	Lower Gabbro		5.614	0.024		51	0.46	17.52	1.04	5.31	0.12	8.66	12.8	2.9	0.11	0.22	99.78		24	25	202	205	20	38
SH-18	Gabbro	Upper Gabbro		6.694	0.022		50	1.36	16.68	1.66	8.44	0.18	5.77	10.62	3.13	0.15	0.12	98.25		111	54	240	257	37	112
SH-21	Gabbro	Upper Gabbro		6.114	0.016		50	1.09	16.78	1.3	6.64	0.14	7.89	11.17	2.83	0.25	0.3	98.47		107	51	194	210	25	68
92-320	Gabbro	Upper Gabbro		7.241	0.019
OR-100A	Gabbro	Upper Gabbro		6.43	0.013		51	1.14	17.28	1.31	6.67	0.14	7.85	11.24	2.83	0.22	0.14	100.19		122	63	204	251	30	72
OR-100B	Gabbro	Upper Gabbro		7.035	0.009		58	0.73	17.59	0.98	4.97	0.1	3.2	6.62	4.59	1.3	0.42	98.82		353	31	226	118	41	55
140-200A	Felsic segregation	Upper Gabbro		6.723	0.012
GD-3	Granite	Meladiorite		8.568	0.012		73	0.32	13.69	0.46	2.36	0.05	0.24	1.3	4.37	3.99	0.27	99.63		819	10	62	13	45	52
GD-6	Granodiorite	Meladiorite		8.297	0.019		71	0.51	14.84	0.48	2.42	0.04	0.62	1.77	4.21	3.95	0.5	100.2		737	34	96	47	31	30
HOR-110	Granodiorite	Meladiorite		7.781	0.011		67	0.75	16.29	0.21	1.07	0.01	1	3.52	6.11	3.03	0.34	99.78		242	26	128	54	62	8
OR-620	Granophyres	granophyre		7.007	0.012		74	0.23	13.44	0.24	1.21	0.02	0.36	1.15	3.78	4.16	0.58	98.93		865	25	114	38	29	23
OR-630	Granophyres	granophyre		5.74	0.011		74	0.26	13.91	0.18	0.93	0.02	0.27	1.24	4.65	3.99	0.67	99.89		977	8	92	10	57	31
Note for sample location see Figure 1
LOI - loss of ignition

## Sheet: EMPA CPX
Table S3a: Electron microprobe data of clinopyroxene
sample	rock type	map unit	spot		SiO2	TiO2	Al2O3	FeO	MnO	MgO	CaO	Na2O	K2O	Cr2O3	Total		molar Mg#	KDFe-Mg
BR GIC 10c	amp px gabbro	upper gabbro	10c11 5		52.475	0.15	0.885	7.486	0.372	14.018	23.642	0.3	0	0.019	99.347		0.769474	0.578243
BR GIC 10c	amp px gabbro	upper gabbro	10c11 6		52.119	0.216	0.924	7.691	0.374	13.895	23.547	0.306	0	0	99.072		0.763057	0.599336
BR GIC 10c	amp px gabbro	upper gabbro	10c7 1px		52.95	0.143	0.486	6.987	0.264	14.569	23.984	0.222	0.005	0	99.61		0.787995	0.497838
BR GIC 10c	amp px gabbro	upper gabbro	10c7 2px		53.149	0.157	0.779	6.823	0.305	14.548	24.076	0.287	0	0.032	100.156		0.791698	0.540317
BR GIC 10c	amp px gabbro	upper gabbro	10c7 8px		53.076	0.075	0.491	6.927	0.333	14.555	23.928	0.302	0.002	0	99.689		0.789272	0.519287
BR GIC 10c	amp px gabbro	upper gabbro	10c7 9px		53.077	0.099	0.499	6.692	0.276	14.642	24.012	0.232	0	0	99.529		0.795925	0.50783
BR GIC 10c	amp px gabbro	upper gabbro	10c7 10px		52.959	0.15	0.631	6.703	0.274	14.579	23.915	0.254	0.006	0	99.471		0.794956	0.515323
BR GIC 10c	amp px gabbro	upper gabbro	10c7 14px		52.43	0.252	0.992	7.249	0.339	14.527	23.158	0.343	0.004	0.038	99.332		0.781287	0.494882
BR GIC 10c	amp px gabbro	upper gabbro	10c8 9px		51.012	0.232	1.075	7.784	0.31	13.908	23.878	0.372	0	0.052	98.623		0.761047	0.595949
BR GIC 10c	amp px gabbro	upper gabbro	10c8 10px		51.128	0.194	0.907	7.74	0.354	14.063	23.422	0.416	0.006	0	98.23		0.76408	0.594646
BR GIC 10c	amp px gabbro	upper gabbro	10c8 12px		51.106	0.158	0.943	7.739	0.407	14.092	23.304	0.415	0.013	0	98.177		0.764475	0.606016
BR GIC 8	px gabbro	upper gabbro	85 1		51.304	0.14	0.722	14.735	0.483	11.18	21.409	0.177	0	0.004	100.154		0.574916	0.364751
BR GIC 8	px gabbro	upper gabbro	85 3		51.007	0.218	0.825	14.386	0.397	10.728	21.732	0.256	0	0	99.549		0.570683	0.344265
BR GIC 8	px gabbro	upper gabbro	85 4		50.903	0.187	0.936	15.969	0.496	10.445	20.696	0.337	0	0.05	100.019		0.538302	0.356533
BR GIC 8	px gabbro	upper gabbro	85 5		51.176	0.166	0.812	15.043	0.446	10.423	21.414	0.278	0.024	0.074	99.856		0.552589	0.342156
BR GIC 8	px gabbro	upper gabbro	85 6		51.071	0.185	0.774	14.531	0.435	10.85	21.776	0.227	0	0.04	99.889		0.570996	0.348126
BR GIC 8	px gabbro	upper gabbro	82 2		51.296	0.222	0.979	14.55	0.432	10.972	21.566	0.31	0.003	0.051	100.381		0.573414	0.396903
BR GIC 8	px gabbro	upper gabbro	82 9		51.418	0.123	0.711	14.857	0.484	10.818	21.47	0.191	0.003	0.052	100.127		0.564827	0.374677
BR GIC 8	px gabbro	upper gabbro	82 11		51.095	0.221	0.898	14.903	0.449	10.607	21.566	0.231	0.005	0	99.975		0.559218	0.347681
BRGIC9A	amp px gabbro	upper gabbro	BRGIC9A18		52.266	0.411	1.817	8.258	0.222	13.51	21.802	0.312	0.02	0.181	98.799		0.744651	0.631527
BRGIC9A	amp px gabbro	upper gabbro	BRGIC9A19		51.789	0.387	1.923	8.33	0.276	13.651	21.845	0.355	0	0.177	98.733		0.744974	0.626375
BRGIC9A	amp px gabbro	upper gabbro	BRGIC9A20		51.931	0.398	2.033	8.155	0.22	13.839	21.052	0.443	0.034	0.246	98.351		0.75155	0.634813
BRGIC9A	amp px gabbro	upper gabbro	BRGIC9A21		50.329	0.927	4.106	8.979	0.187	13.487	18.745	0.762	0.133	0.27	97.925		0.728074	0.606329
BRGIC9A	amp px gabbro	upper gabbro	BRGIC9A22		52.469	0.164	1.014	7.642	0.267	14.032	22.141	0.287	0.01	0.111	98.137		0.765974	0.609664
BRGIC9A	amp px gabbro	upper gabbro	BRGIC9A23		53.008	0.139	0.85	7.661	0.237	14.247	22.234	0.234	0.003	0.041	98.654		0.768247	0.609641
BRGIC9A	amp px gabbro	upper gabbro	BRGIC9A67		52.545	0.217	0.844	7.008	0.2	14.792	22.266	0.221	0.004	0	98.097		0.790024
BRGIC9A	amp px gabbro	upper gabbro	BRGIC9A68		52.561	0.28	1.02	7.238	0.291	14.769	21.953	0.221	0.019	0	98.352		0.784354	0.649301
BRGIC9A	amp px gabbro	upper gabbro	BRGIC9A69		52.651	0.268	0.822	6.916	0.203	14.938	22.126	0.198	0.007	0.054	98.183		0.79382	0.648197
BRGIC9A	amp px gabbro	upper gabbro	GIC9A93P2		53.747	0.214	1.008	7.653	0.253	14.489	22.057	0.253	0.03	0	99.704		0.771417	0.625959
BRGIC9A	amp px gabbro	upper gabbro	GIC9A94P2		53.765	0.223	1.04	7.804	0.291	14.609	21.785	0.232	0	0	99.749		0.76942	0.707195
BRGIC9A	amp px gabbro	upper gabbro	GIC9A95P2		53.748	0.24	1.05	8.106	0.236	14.628	21.395	0.229	0	0	99.632		0.76285	0.578514
BRGIC9A	amp px gabbro	upper gabbro	GIC9A96P2		53.684	0.24	0.963	7.721	0.293	14.501	21.598	0.233	0	0.007	99.24		0.77	0.571201
BRGIC9A	amp px gabbro	upper gabbro	GIC9A101P2		53.004	0.301	1.252	8.263	0.244	14.481	21.579	0.293	0.007	0	99.424		0.757512	0.503262
BRGIC9A	amp px gabbro	upper gabbro	GIC9A103P2		54.055	0.235	1.065	8.047	0.214	14.612	21.739	0.231	0	0	100.198		0.763972	0.520588
BRGIC9A	amp px gabbro	upper gabbro	GIC9A105P2		53.783	0.295	1.11	8.111	0.246	14.235	21.502	0.291	0	0.02	99.593		0.757775	0.491801
BRGIC9A	amp px gabbro	upper gabbro	GIC9A109P2		53.435	0.276	1.382	7.938	0.267	14.052	21.644	0.335	0.012	0.092	99.433		0.759354	0.60613
BRGIC9A	amp px gabbro	upper gabbro	GIC9A114P2		53.361	0.254	1.007	7.019	0.227	14.778	21.839	0.265	0.005	0.042	98.797		0.789607	0.584993
BRGIC9A	amp px gabbro	upper gabbro	GIC9A115P2		53.596	0.291	0.912	7.986	0.247	15.488	20.8	0.235	0	0.013	99.568		0.775636	0.605262
BRGIC9A	amp px gabbro	upper gabbro	GIC9A116P2		53.56	0.223	1.128	7.375	0.274	15	21.577	0.271	0	0.013	99.421		0.783807	0.600067
BRGIC9A	amp px gabbro	upper gabbro	GIC9A117P2		53.06	0.329	1.301	7.05	0.226	14.855	21.509	0.305	0	0.088	98.723		0.789738	0.504529
																		0.547723
BR GIC 9b	amp px gabbro	upper gabbro	9b1 4		53.281	0.156	0.998	8.871	0.269	14.827	21.734	0.322		0.092	100.55		0.748701	0.522273
BR GIC 9b	amp px gabbro	upper gabbro	9b1 6		52.529	0.274	1.294	8.531	0.265	14.376	22.675	0.299	0.001	0.214	100.458		0.750239	0.504131
BR GIC 9b	amp px gabbro	upper gabbro	9b1 8		52.697	0.273	1.228	8.596	0.256	14.293	22.087	0.285	0.007	0.102	99.824		0.747724	0.561074
BR GIC 9b	amp px gabbro	upper gabbro	9b1 9		52.896	0.241	1.288	8.208	0.257	14.289	22.536	0.311		0.14	100.166		0.756285	0.567445
BR GIC 9b	amp px gabbro	upper gabbro	9b2 11		52.739	0.273	1.457	8.427	0.253	14.59	21.959	0.275	0.004	0.132	100.109		0.755272	0.588638
BR GIC 9b	amp px gabbro	upper gabbro	9b2 12		52.767	0.247	1.227	8.47	0.258	14.665	21.915	0.295	0.004		99.848		0.755279	0.565591
GIC3	px gabbro	meladiorite	P GIC3P2_1		51.5549	0.2272	0.692	16.3303	0.3704	12.4893	17.4104	0.3432	0.0207	0.0238	99.4622		0.576858	0.612055
GIC3	px gabbro	meladiorite	P GIC3P2_2		51.7462	0.0099	0.0838	11.8694	0.2968	12.2657	22.0541	0.1004	0.0316	0	98.4579		0.648141	0.74983
GIC3	px gabbro	meladiorite	P GIC3P2_3		51.0827	0.2404	0.7276	12.6615	0.2481	12.0214	20.7258	0.299	0.0126	0	98.0191		0.628587	0.554937
GIC3	px gabbro	meladiorite	P GIC3P2_4		51.3004	0.2867	0.7625	12.6758	0.3133	12.0269	20.5661	0.2018	0.0136	0.0276	98.1747		0.62843	0.634916
GIC3	px gabbro	meladiorite	P GIC3P2_5		51.9273	0.0844	0.2489	12.397	0.3253	12.2406	21.124	0.2047	0.0085	0.0054	98.5661		0.637687	0.604
GIC3	px gabbro	meladiorite	P GIC3P2_6		51.6827	0.1098	0.4898	12.3419	0.2764	12.212	21.1507	0.2599	0.0186	0.0277	98.5695		0.638176	0.638104
GIC3	px gabbro	meladiorite	P GIC3P2_7		51.6473	0.1055	0.6886	12.7675	0.329	12.281	20.6855	0.2366	0.0191	0.0098	98.7699		0.631623	0.552188
GIC3	px gabbro	meladiorite	P GIC3P2_8		51.9553	0.1856	0.6837	12.8242	0.3201	12.3183	20.5206	0.3341	0.0116	0	99.1535		0.631298	0.604406
GIC3	px gabbro	meladiorite	P GIC3P2_1		51.6985	0.1462	0.6604	12.9579	0.3023	12.1409	20.5908	0.2544	0.0362	0.0303	98.8179		0.625489	0.612675
GIC3	px gabbro	meladiorite	P GIC3P2_2		52.2197	0.2191	0.6877	13.2942	0.3585	12.0075	20.1734	0.2271	0.0216	0	99.2088		0.61686	0.580792
GIC3	px gabbro	meladiorite	P GIC3P2_3		51.8358	0.1181	0.7143	13.4869	0.3668	12.1207	20.5542	0.3327	0.0322	0	99.5617		0.615675	0.579565
GIC3	px gabbro	meladiorite	P GIC3P2_4		52.5208	0.0564	0.2644	11.7226	0.2954	12.1743	21.9955	0.1623	0.0095	0.0099	99.2111		0.649273	0.606945
GIC3	px gabbro	meladiorite	P GIC3P2_5		52.0309	0.1562	0.5456	12.8582	0.3292	12.0353	20.6686	0.2475	0.0151	0.0116	98.8982		0.625251	0.596182
GIC3	px gabbro	meladiorite	P GIC3P2_6		52.161	0.114	0.5673	12.6991	0.2856	11.9986	20.5767	0.2053	0.0181	0.0232	98.6489		0.627451	0.597017
GIC3	px gabbro	meladiorite	P GIC3P3_5		51.4262	0.2012	0.7954	12.6297	0.3634	12.1827	20.6772	0.2054	0.0267	0.0357	98.5436		0.632278	0.594506
GIC3	px gabbro	meladiorite	P GIC3P3_6		51.8068	0.114	0.6384	12.9222	0.3553	12.2433	20.465	0.1991	0.0136	0.0312	98.7889		0.628099	0.605264
GIC3	px gabbro	meladiorite	P GIC3P3_7		51.8163	0.1592	0.6249	12.4989	0.3273	12.1692	20.5898	0.2087	0.0156	0	98.4099		0.634438	0.589002

## Sheet: EMPA OPX
Table S3b: Electron microprobe data of orthopyroxene
sample	rock type	unit	spot		SiO2	TiO2	Al2O3	FeO	MnO	MgO	CaO	Na2O	K2O	Cr2O3	Total		molar Mg#	KDFe-Mg
BR GIC 8	px gabbro	upper gabbro	85 15		49.982	0.218	0.354	33.796	0.986	14.043	1.07	0	0.002	0	100.451		0.425513	0.615454
BR GIC 8	px gabbro	upper gabbro	85 16		49.772	0.237	0.423	33.308	0.915	13.863	1.47	0.003	0.013	0.027	100.031		0.425915	0.614443
BR GIC 8	px gabbro	upper gabbro	85 17		49.635	0.243	0.426	34.043	1.003	13.955	0.97	0	0.004	0.013	100.292		0.4222	0.623861
BR GIC 8	px gabbro	upper gabbro	85 18		50.106	0.167	0.427	33.965	1.017	14.024	0.877	0.011	0	0.027	100.621		0.423963	0.619369
BR GIC 8	px gabbro	upper gabbro	85 19		49.933	0.177	0.394	32.921	0.91	14.058	1.827	0.034	0	0	100.254		0.4322	0.59888
BR GIC 8	px gabbro	upper gabbro	85 20		49.751	0.158	0.384	33.358	0.952	14.079	1.343	0.056	0.019	0.021	100.121		0.429332	0.605924
BR GIC 8	px gabbro	upper gabbro	82 6		50.486	0.184	0.431	33.949	0.992	14.219	1.085	0.013	0.001	0	101.36		0.427455	0.610588
BR GIC 8	px gabbro	upper gabbro	82 7		50.299	0.147	0.469	33.404	0.943	14.18	1.332	0	0.008	0.032	100.814		0.430746	0.602438
BR GIC 8	px gabbro	upper gabbro	82 8		50.205	0.181	0.393	33.211	0.905	14.199	1.252	0	0	0	100.346		0.432496	0.598156
BR GIC 8	px gabbro	upper gabbro	82 10		50.165	0.072	0.419	28.27	0.784	12.905	7.16	0.065	0	0.016	99.856		0.448644	0.560219
BR GIC 8	px gabbro	upper gabbro	82 12		50.142	0.196	0.442	31.878	1.006	12.231	5.576	0.07	0.004	0	101.545		0.40615	0.666529
BR GIC 8	px gabbro	upper gabbro	82 13		50.504	0.096	0.479	27.993	0.793	12.294	9.111	0.106	0	0	101.376		0.439102	0.582299
BRGIC9A	px amp gabbro	upper gabbro	BRGIC9A31		52.622	0.171	0.72	23.59	0.536	21.357	0.531	0.018	0.023	0	99.568		0.617416	1.17262
BRGIC9A	px amp gabbro	upper gabbro	BRGIC9A32		52.428	0.218	0.79	23.466	0.554	21.23	0.782	0.022	0.021	0	99.511		0.617252	1.17343
BRGIC9A	px amp gabbro	upper gabbro	BRGIC9A33		52.203	0.261	0.795	23.275	0.512	21.314	0.864	0	0.037	0.016	99.277		0.620111	1.15929
BRGIC9A	px amp gabbro	upper gabbro	BRGIC9A34		52.331	0.201	0.76	23.282	0.516	21.489	0.94	0.028	0.02	0	99.567		0.621965	1.1502
BRGIC9A	px amp gabbro	upper gabbro	BRGIC9A35		52.689	0.158	0.715	23.288	0.532	21.723	0.865	0.002	0.013	0	99.985		0.624448	1.1381
BRGIC9A	px amp gabbro	upper gabbro	BRGIC9A36		52.47	0.214	0.732	23.172	0.528	21.652	0.895	0.017	0	0	99.68		0.624851	1.13614
BRGIC9A	px amp gabbro	upper gabbro	BRGIC9A37		52.635	0.169	0.736	23.094	0.479	21.475	0.914	0.024	0	0.001	99.527		0.623716	1.14165
BRGIC9A	px amp gabbro	upper gabbro	BRGIC9A38		52.65	0.181	0.683	23.294	0.516	21.525	0.846	0.007	0	0	99.702		0.622237	1.14886
BRGIC9A	px amp gabbro	upper gabbro	BRGIC9A39		52.568	0.186	0.697	23.024	0.576	21.594	1.01	0.01	0.003	0.011	99.679		0.625724	1.13192
BRGIC9A	px amp gabbro	upper gabbro	BRGIC9A40		53.038	0.183	0.646	22.557	0.53	22.059	0.662	0.073	0.008	0.008	99.764		0.63546	1.08558
BRGIC9A	px amp gabbro	upper gabbro	BRGIC9A70		52.736	0.144	0.661	22.385	0.596	22.172	0.864	0	0	0	99.558		0.638411	1.07182
BRGIC9A	px amp gabbro	upper gabbro	BRGIC9A71		52.537	0.151	0.624	23.686	0.506	21.892	0.634	0	0.007	0.01	100.047		0.622289	1.14861
BRGIC9A	px amp gabbro	upper gabbro	BRGIC9A72		52.705	0.082	0.544	23.302	0.52	21.604	0.884	0.01	0.023	0.005	99.679		0.623017	1.14506
BRGIC9A	px amp gabbro	upper gabbro	BRGIC9A73		52.183	0.218	0.696	23.746	0.553	21.136	0.809	0.061	0	0	99.402		0.613394	1.19271
BRGIC9A	px amp gabbro	upper gabbro	BRGIC9A77		52.118	0.14	0.677	23.054	0.492	21.621	0.968	0.003	0.013	0	99.086		0.625711	1.13198
BRGIC9A	px amp gabbro	upper gabbro	BRGIC9A78		52.393	0.156	0.726	22.928	0.547	21.675	0.974	0	0.017	0.056	99.472		0.627577	1.12299
BRGIC9A	px amp gabbro	upper gabbro	BRGIC9A79		52.217	0.141	0.732	22.937	0.538	21.747	0.852	0.028	0.012	0.019	99.223		0.62826	1.11971
BRGIC9A	px amp gabbro	upper gabbro	BRGIC9A80		52.05	0.167	0.772	23.007	0.538	21.601	0.807	0.015	0	0.005	98.962		0.625973	1.13072
BRGIC9A	px amp gabbro	upper gabbro	BRGIC9A81		52.317	0.162	0.727	23.006	0.516	21.726	0.694	0.014	0.004	0	99.166		0.627333	1.12416
BRGIC9A	px amp gabbro	upper gabbro	BRGIC9A86		52.608	0.211	0.726	23.733	0.544	21.098	0.674	0.002	0	0	99.596		0.613097	1.19421
BRGIC9A	px amp gabbro	upper gabbro	BRGIC9A87		52.839	0.241	0.693	23.83	0.539	21.264	0.788	0.009	0.009	0	100.212		0.613988	1.18973
BRGIC9A	px amp gabbro	upper gabbro	BRGIC9A88		53.134	0.109	0.628	23.707	0.607	21.158	0.848	0	0	0	100.191		0.61403	1.18952
BRGIC9A	px amp gabbro	upper gabbro	BRGIC9A119		53.317	0.101	0.739	21.302	0.564	22.896	0.825	0.019	0.003	0	99.766		0.657055	0.987709
BRGIC9A	px amp gabbro	upper gabbro	BRGIC9A120		53.424	0.138	0.726	21.011	0.581	22.843	0.696	0	0	0	99.419		0.659628	0.976476
BRGIC9A	px amp gabbro	upper gabbro	BRGIC9A124		53.136	0.149	0.796	21.535	0.656	22.55	0.694	0.034	0	0.048	99.598		0.651149	1.01383
BRGIC9A	px amp gabbro	upper gabbro	BRGIC9A125		53.18	0.073	0.728	21.405	0.571	22.557	0.824	0.045	0.002	0.032	99.417		0.652593	1.0074
BRGIC9A	px amp gabbro	upper gabbro	GIC9A99P2		54.41	0.134	0.523	23.002	0.635	21.991	0.463	0	0	0.007	101.165		0.630203	1.11042
BRGIC9A	px amp gabbro	upper gabbro	GIC9A100P2		53.867	0.143	0.678	23.038	0.552	21.861	0.487	0	0	0	100.626		0.628455	1.11878
BRGIC9A	px amp gabbro	upper gabbro	GIC9A102P2		54.006	0.162	0.686	23.02	0.596	22.016	0.485	0.032	0.022	0	101.025		0.630286	1.11003
BRGIC9A	px amp gabbro	upper gabbro	GIC9A107P2		54.253	0.119	0.5	23.765	0.582	21.255	0.584	0.015	0.001	0.056	101.13		0.614535	1.18698
BRGIC9A	px amp gabbro	upper gabbro	GIC9A108P2		53.927	0.124	0.518	23.881	0.577	21.102	0.615	0.019	0	0.064	100.827		0.611666	1.20143
BR GIC 9b	px amp gabbro	upper gabbro	9b7 7		52.967	0.206	0.685	24.382	0.657	21.16	0.93	0.055	0.003		101.045		0.607378	1.21612
BR GIC 9b	px amp gabbro	upper gabbro	9b7 8		53.312	0.198	0.646	23.615	0.601	21.564	1.034		0.007		100.977		0.619442	1.1558
BR GIC 9b	px amp gabbro	upper gabbro	9b7 9		52.938	0.17	0.64	23.734	0.624	21.659	0.856	0.006	0.01		100.637		0.619293	1.15653
BR GIC 9b	px amp gabbro	upper gabbro	9b7 10		53.289	0.174	0.577	23.921	0.668	21.503	0.901	0.026		0.032	101.091		0.615732	1.1741
BR GIC 9b	px amp gabbro	upper gabbro	9b7 11		53.574	0.238	0.618	23.404	0.621	21.666	0.919	0.018	0.011		101.069		0.622665	1.14008
BR GIC 9b	px amp gabbro	upper gabbro	9b7 13		53.324	0.177	0.67	23.863	0.587	21.611	0.731	0.035	0.016	0.035	101.049		0.61749	1.1654
BR GIC 9b	px amp gabbro	upper gabbro	9b7 15		53.164	0.174	0.67	23.315	0.657	21.838	0.845	0.036	0.008		100.707		0.625414	1.1268
BR GIC 9b	px amp gabbro	upper gabbro	9b1 1		53.585	0.148	0.655	23.092	0.592	22.169	0.905			0.009	101.155		0.631171	1.09936
BR GIC 9b	px amp gabbro	upper gabbro	9b1 2		54.179	0.051	0.371	23.485	0.599	22.473	0.404		0.007	0.027	101.596		0.630413	1.10294
BR GIC 9b	px amp gabbro	upper gabbro	9b1 3		53.514	0.161	0.556	23.363	0.58	21.981	0.643	0.004		0.059	100.861		0.62646	1.12177
BR GIC 9b	px amp gabbro	upper gabbro	9b1 11		53.275	0.15	0.604	23.013	0.551	22.323	0.867	0.003	0.009		100.795		0.633577	1.08804
BR GIC 9b	px amp gabbro	upper gabbro	9b1 15		52.921	0.228	0.52	24.169	0.616	21.49	0.701		0.013	0.019	100.677		0.613145	1.18699
BR GIC 9b	px amp gabbro	upper gabbro	9b2 1		53.302	0.096	0.74	22.262	0.587	22.549	0.676		0.01	0.019	100.241		0.643559	1.04198
BR GIC 9b	px amp gabbro	upper gabbro	9b2 2		53.334	0.071	0.791	22.233	0.574	22.725	0.863	0.028		0.03	100.649		0.645639	1.03257
BR GIC 9b	px amp gabbro	upper gabbro	9b2 3		53.513	0.141	0.807	22.629	0.586	22.768	0.785			0.002	101.231		0.642024	1.04897
BR GIC 9b	px amp gabbro	upper gabbro	9b2 4		52.909	0.174	0.834	22.785	0.595	22.589	0.94		0.016	0.032	100.874		0.638624	1.06457
BR GIC 9b	px amp gabbro	upper gabbro	9b2 7		53.512	0.123	0.771	22.305	0.54	22.85	1.045	0.018	0.006		101.17		0.646154	1.03024
GIC3	px gabbro	meladiorite	P GIC3P3_1		50.9285	0.1296	0.3347	31.003	0.7035	16.1607	1.2219	0.142	0.0231	0	100.647		0.481642	1.09978
GIC3	px gabbro	meladiorite	P GIC3P3_2		51.4338	0.1831	0.3083	30.7452	0.7031	16.3251	1.1839	0.0157	0.0292	0.0323	100.96		0.486255	1.07966
GIC3	px gabbro	meladiorite	P GIC3P3_3		51.1021	0.2427	0.3581	30.2064	0.6812	16.4187	1.8509	0.0431	0.0164	0	100.92		0.492102	1.05469
GIC3	px gabbro	meladiorite	P GIC3P3_4		51.133	0.1805	0.3431	30.9814	0.723	16.3304	1.1888	0.0827	0.0051	0	100.968		0.484424	1.0876
GIC3	px gabbro	meladiorite	P GIC3P4_1		51.0267	0.127	0.278	30.6947	0.6838	16.2057	0.9637	0.0551	0.0262	0	100.061		0.484832	1.08582
GIC3	px gabbro	meladiorite	P GIC3P4_2		51.225	0.083	0.2738	30.11	0.7169	16.4262	1.0296	0.0588	0.0277	0.0199	99.9709		0.493015	1.05084
GIC3	px gabbro	meladiorite	P GIC3P4_3		51.157	0.0387	0.2199	31.2355	0.7197	16.4765	0.5788	0.004	0	0.019	100.449		0.484609	1.08679
GIC3	px gabbro	meladiorite	P GIC3P4_4		50.854	0.1581	0.3298	29.6551	0.7347	16.2557	1.6037	0	0.0169	0	99.608		0.494212	1.04582
GIC3	px gabbro	meladiorite	P GIC3P4_5		51.1449	0.2339	0.3224	30.2221	0.6927	16.4952	1.0816	0.0078	0.0092	0	100.21		0.493134	1.05034
GIC3	px gabbro	meladiorite	P GIC3P4_6		50.8078	0.1412	0.3193	30.4081	0.7123	15.928	1.2103	0.1019	0.0184	0.0124	99.6597		0.482858	1.09444
GIC3	px gabbro	meladiorite	P GIC3P5_1		51.0241	0.1024	0.3329	30.0801	0.7574	16.1761	0.9953	0.0468	0.0072	0	99.5223		0.489428	1.06603
GIC3	px gabbro	meladiorite	P GIC3P5_2		51.32	0.1221	0.307	30.4249	0.7349	16.0755	1.0922	0.0078	0.0331	0	100.117		0.485022	1.085
GIC3	px gabbro	meladiorite	P GIC3P5_3		49.73	0.1643	0.3532	29.0689	0.6876	15.9979	1.4856	0.1934	0.0289	0.0049	97.7147		0.495206	1.04167
GIC3	px gabbro	meladiorite	P GIC3P5_4		51.2689	0.1625	0.3396	29.7741	0.7139	16.4969	1.2857	0	0.0162	0	100.058		0.496893	1.03467
GIC3	px gabbro	meladiorite	P GIC3P5_5		50.9076	0.147	0.3239	31.1616	0.7375	15.6603	0.9067	0.1012	0.0409	0	99.9867		0.472522	1.14073
GIC3	px gabbro	meladiorite	P GIC3P5_6		50.8196	0.2004	0.3964	30.7361	0.7817	15.7973	1.0573	0.0232	0.0171	0.0008	99.8299		0.478123	1.1154
GIC3	px gabbro	meladiorite	P GIC3P5_7		51.0109	0.1593	0.3761	30.9665	0.7805	15.8627	1.1349	0.054	0.0261	0	100.371		0.477291	1.11913
GIC3	px gabbro	meladiorite	P GIC3P5_8		50.8995	0.2399	0.3736	30.4982	0.6335	15.9331	1.0935	0	0.028	0	99.6993		0.482199	1.09733
GIC3	px gabbro	meladiorite	P GIC3P6_1		50.673	0.1002	0.3079	30.6262	0.7335	15.7414	1.0924	0.073	0.02	0	99.3676		0.478133	1.11536
GIC3	px gabbro	meladiorite	P GIC3P6_2		50.8588	0.2379	0.3614	30.2974	0.7276	16.1176	1.077	0.0458	0.0319	0.0056	99.761		0.486725	1.07763
GIC3	px gabbro	meladiorite	P GIC3P6_3		50.8027	0.1845	0.2955	30.1824	0.7081	16.3409	1.0649	0.0839	0.0145	0.0097	99.6871		0.491113	1.05887
GIC3	px gabbro	meladiorite	P GIC3P6_4		50.8683	0.1714	0.3247	30.5369	0.7531	16.2943	1.1694	0.1375	0.004	0.0121	100.272		0.487482	1.07437
GIC3	px gabbro	meladiorite	P GIC3P6_5		50.793	0.1286	0.3709	30.4297	0.671	16.6349	0.8086	0.0954	0.015	0	99.9471		0.49353	1.04868
GIC3	px gabbro	meladiorite	P GIC3P6_6		51.0697	0.1184	0.3257	30.6998	0.7319	16.4827	0.9878	0.023	0.008	0	100.447		0.489025	1.06775
GIC3	px gabbro	meladiorite	P GIC3P6_7		50.9203	0.1155	0.3353	31.181	0.7083	16.4537	0.8816	0.0498	0.0384	0	100.684		0.484699	1.0864
																		0.560219

## Sheet: EMPA Amphibole
Table S3c: Electron microprobe data of amphibole
sample	rock type	unit	spot		SiO2	TiO2	Al2O3	FeO	MnO	MgO	CaO	Na2O	K2O	Cr2O3	Total		Si	Ti	Al	Zr	Cr	Mn3+	Mn2+	Fe2+	Zn	Mg	Ca	Li	Na	K	Ni	P	OH	F	Cl	Sum	Si-T	ivAl-T	Ti-T	SumT	viAl-C	Ti-C	Zr-C	Cr-C	Fe3-C	Mn3-C	Mg-C	Fe2-C	Mn2-C
GIC13	amp gabbro	lower gabbro	B GIC13A3_1		46.1882	0.6448	7.508	15.1722	0.2711	12.4343	11.4339	0.9622	0.5963	0.019	95.4684		7.0048	0.0735497	1.3419	0	0.00227805	0	0.0348203	1.92405	0	2.81132	1.85772	0	0.282903	0.115355	0	0	0	0	0	15.4487	6.90248	1.09752	0	8	0.224771	0.0724754	0	0.00224477	0.662131	0	2.77025	1.23381	0.0343117
GIC13	amp gabbro	lower gabbro	B GIC13A3_2		46.9074	0.6766	7.1338	15.3429	0.2708	12.7845	11.5802	0.9614	0.5671	0	96.5267		7.03941	0.0763693	1.26167	0	0	0	0.0344178	1.92533	0	2.86025	1.8618	0	0.27971	0.108558	0	0	0	0	0	15.4475	6.93409	1.06591	0	8	0.176888	0.0752268	0	0	0.677919	0	2.81746	1.21861	0.0339028
GIC13	amp gabbro	lower gabbro	B GIC13A3_3		45.8688	0.7111	7.9038	15.4507	0.3023	12.041	11.5291	1.0453	0.6252	0	95.6685		6.95581	0.081106	1.41253	0	0	0	0.0388246	1.95921	0	2.72219	1.87304	0	0.307312	0.120937	0	0	0	0	0	15.471	6.8662	1.1338	0	8	0.260525	0.0800611	0	0	0.584965	0	2.68712	1.34901	0.0383245
GIC13	amp gabbro	lower gabbro	B GIC13A3_4		46.9388	0.798	7.3484	15.4543	0.2771	12.5666	11.3963	0.8314	0.5384	0.0224	96.3195		7.04028	0.0900229	1.29892	0	0.00265614	0	0.0351992	1.93825	0	2.80996	1.83123	0	0.241756	0.103008	0	0	0	0	0	15.3913	6.92559	1.07441	0	8	0.203342	0.0885563	0	0.00261287	0.737188	0	2.76419	1.16949	0.0346258
GIC13	amp gabbro	lower gabbro	B GIC13A3_5		46.8752	0.8126	7.4876	15.3244	0.3361	12.4401	11.5079	1.0114	0.5863	0	96.5412		7.02197	0.0915555	1.32187	0	0	0	0.0426406	1.91956	0	2.77821	1.84686	0	0.293729	0.112033	0	0	0	0	0	15.4284	6.92827	1.07173	0	8	0.232505	0.0903339	0	0	0.605582	0	2.74114	1.28837	0.0420716
GIC13	amp gabbro	lower gabbro	B GIC13A3_6		47.1644	0.6063	7.3014	15.2272	0.2804	12.5196	11.5738	0.9137	0.5677	0.0327	96.3161		7.06843	0.068342	1.28957	0	0.00387437	0	0.0355898	1.90823	0	2.7972	1.85826	0	0.265473	0.108527	0	0	0	0	0	15.4035	6.97653	1.02347	0	8	0.249336	0.0674535	0	0.003824	0.590287	0	2.76083	1.29314	0.0351271
GIC13	amp gabbro	lower gabbro	B GIC13A3_7		47.1756	0.6129	6.8597	14.8638	0.2472	12.762	11.409	0.7681	0.5287	0.0447	95.5016		7.1187	0.0695607	1.21988	0	0.00533255	0	0.0315915	1.87549	0	2.87095	1.84439	0	0.224703	0.101766	0	0	0	0	0	15.3624	7.01535	0.984651	0	8	0.217521	0.0685509	0	0.00525513	0.658127	0	2.82927	1.19014	0.0311328
GIC13	amp gabbro	lower gabbro	B GIC13A3_8		46.1461	0.7732	7.7408	15.4027	0.3072	12.2643	11.6843	0.962	0.6301	0.0172	96.044		6.9627	0.0877458	1.37644	0	0.00205171	0	0.0392557	1.94331	0	2.75874	1.88872	0	0.281401	0.121272	0	0	0	0	0	15.4616	6.8727	1.1273	0	8	0.231348	0.0866115	0	0.00202519	0.586944	0	2.72308	1.33125	0.0387482
GIC13	amp gabbro	lower gabbro	B GIC13A3_9		46.5266	0.626	7.4559	15.3034	0.2831	12.3274	11.5171	0.9216	0.5547	0.0069	95.6591		7.03174	0.0711586	1.32798	0	0.000824433	0	0.036236	1.93398	0	2.77752	1.86477	0	0.27003	0.106937	0	0	0	0	0	15.4212	6.936	1.064	0	8	0.245898	0.0701898	0	0.000813208	0.617778	0	2.73971	1.28987	0.0357426
GIC13	amp gabbro	lower gabbro	B GIC13A5_1		47.6039	0.6995	7.5205	15.2674	0.2695	12.4697	11.7965	0.8276	0.5925	0.104	97.3148		7.06014	0.078028	1.31446	0	0.0121941	0	0.0338507	1.89339	0	2.75709	1.87433	0	0.237958	0.11209	0	0	0	0	0	15.3735	6.98006	1.01994	0	8	0.279606	0.0771429	0	0.0120558	0.515865	0	2.72582	1.35604	0.0334668
GIC13	amp gabbro	lower gabbro	B GIC13A5_2		48.5447	0.6119	6.4932	14.8385	0.261	12.9458	11.7477	0.919	0.5074	0.1006	97.1098		7.18782	0.0681439	1.13304	0	0.011776	0	0.0327291	1.83716	0	2.85765	1.8635	0	0.263802	0.0958328	0	0	0	0	0	15.3515	7.11756	0.882436	0	8	0.239526	0.0674779	0	0.0116609	0.445203	0	2.82972	1.37401	0.0324092
GIC13	amp gabbro	lower gabbro	B GIC13A5_3		48.1602	0.754	6.9313	15.0662	0.2198	12.5516	11.7631	0.8708	0.6031	0.1849	97.2552		7.13466	0.0840133	1.21012	0	0.0216554	0	0.0275773	1.86634	0	2.7721	1.86693	0	0.250099	0.113968	0	0	0	0	0	15.3475	7.0713	0.928695	0	8	0.270682	0.0832673	0	0.0214631	0.404846	0	2.74748	1.44493	0.0273324
GIC13	amp gabbro	lower gabbro	B GIC13A5_4		46.9872	0.8807	7.8311	15.7431	0.2658	12.1734	11.6972	1.1071	0.6903	0.1648	97.6847		6.97586	0.0983419	1.37016	0	0.0193429	0	0.0334205	1.95439	0	2.69436	1.86047	0	0.31865	0.130727	0	0	0	0	0	15.4557	6.89845	1.10155	0	8	0.253407	0.0972506	0	0.0191282	0.504811	0	2.66446	1.42789	0.0330496
GIC13	amp gabbro	lower gabbro	B GIC13A5_5		48.0303	0.7294	6.9907	15.2129	0.2534	12.6346	11.652	0.9177	0.5425	0.0999	97.1874		7.12138	0.0813404	1.22152	0	0.0117101	0	0.0318195	1.8861	0	2.79277	1.85085	0	0.263789	0.102602	0	0	0	0	0	15.3639	7.04195	0.958048	0	8	0.249844	0.0804332	0	0.0115794	0.50732	0	2.76162	1.35774	0.0314646
GIC13	amp gabbro	lower gabbro	B GIC13A5_6		48.8162	0.5726	5.9248	14.6271	0.2493	13.305	11.7915	0.7631	0.4321	0.0543	96.7398		7.24571	0.0639234	1.03638	0	0.00637179	0	0.0313384	1.81542	0	2.94412	1.87503	0	0.219587	0.0818106	0	0	0	0	0	15.3197	7.16672	0.833277	0	8	0.191808	0.0632266	0	0.00630233	0.49596	0	2.91203	1.29967	0.0309968
GIC13	amp gabbro	lower gabbro	B GIC13A5_7		51.0131	0.4268	4.6328	13.8599	0.2752	14.2864	11.8341	0.6175	0.3217	0.0208	97.3845		7.45022	0.0468817	0.797372	0	0.00240157	0	0.0340388	1.69259	0	3.11053	1.85159	0	0.174837	0.0599304	0	0	0	0	0	15.2204	7.37419	0.625808	0	8	0.163426	0.0464033	0	0.00237706	0.464652	0	3.07879	1.21066	0.0336914
GIC13	amp gabbro	lower gabbro	B GIC13A5_8		49.946	0.3868	5.0795	14.2685	0.3357	13.6855	11.8133	0.6691	0.3624	0.0423	96.7663		7.38006	0.042987	0.884525	0	0.00494134	0	0.0420097	1.76295	0	3.0147	1.87005	0	0.191672	0.0683056	0	0	0	0	0	15.2622	7.30578	0.69422	0	8	0.181401	0.0425543	0	0.0048916	0.458352	0	2.98436	1.28685	0.0415868
GIC13	amp gabbro	lower gabbro	B GIC13A5_9		51.6903	0.3209	4.0825	13.5494	0.2428	14.5913	12.0796	0.5292	0.2248	0.052	97.7231		7.52321	0.0351282	0.700246	0	0.00598333	0	0.0299283	1.64899	0	3.16602	1.88351	0	0.149322	0.0417349	0	0	0	0	0	15.1841	7.46037	0.539631	0	8	0.154766	0.0348348	0	0.00593335	0.381028	0	3.13957	1.25419	0.0296783
GIC13	amp gabbro	lower gabbro	B GIC13A6_1		48.2483	0.6586	7.7937	15.1877	0.282	12.1575	11.9362	1.0581	0.6196	0.0276	98.8384		7.08768	0.0727672	1.34926	0	0.00320536	0	0.0350841	1.86559	0	2.66251	1.8785	0	0.30134	0.116103	0	0	0	0	0	15.372	7.04643	0.95357	0	8	0.387838	0.0723437	0	0.0031867	0.266161	0	2.64701	1.58858	0.0348799
GIC13	amp gabbro	lower gabbro	B GIC13A6_2		48.8608	0.6473	7.0018	14.4592	0.2837	12.5909	12.0951	1.0776	0.5295	0.013	97.6917		7.17945	0.0715366	1.21247	0	0.00151015	0	0.0353044	1.77655	0	2.75812	1.90398	0	0.306971	0.0992444	0	0	0	0	0	15.3451	7.16021	0.839794	0	8	0.369425	0.0713449	0	0.0015061	0.122965	0	2.75072	1.64883	0.0352098
GIC13	amp gabbro	lower gabbro	B GIC13A6_3		49.453	0.6035	6.6467	14.6476	0.2778	12.9013	12.065	0.7976	0.4766	0.0164	98.2249		7.23077	0.0663683	1.14532	0	0.00189575	0	0.0344003	1.79086	0	2.81223	1.88991	0	0.226092	0.0888904	0	0	0	0	0	15.2867	7.18554	0.814464	0	8	0.323693	0.0659531	0	0.00188389	0.285999	0	2.79463	1.49366	0.0341851
GIC13	amp gabbro	lower gabbro	B GIC13A6_4		48.8604	0.6917	7.1011	14.6845	0.2625	12.5189	12.1506	0.9128	0.5305	0	97.843		7.17071	0.076351	1.22818	0	0	0	0.0326267	1.80205	0	2.73903	1.9104	0	0.25971	0.0993115	0	0	0	0	0	15.3184	7.14381	0.856188	0	8	0.367383	0.0760647	0	0	0.171878	0	2.72875	1.62342	0.0325043
GIC13	amp gabbro	lower gabbro	B GIC13A6_5		49.1101	0.5991	6.9369	14.597	0.2415	12.7039	12.0368	0.769	0.4873	0.0414	97.6583		7.20667	0.0661233	1.19966	0	0.00480296	0	0.0300137	1.79114	0	2.77924	1.89233	0	0.218775	0.0912155	0	0	0	0	0	15.28	7.16388	0.836121	0	8	0.356418	0.0657307	0	0.00477444	0.271511	0	2.76273	1.509	0.0298355
BRGIC 10A	segregation	felsic segregation	Line 1 GIC10AA		45.347	1.487	8.878	16.595	0.31	11.193	11.295	1.341	0.871	0.02	97.337		6.79774	0.167656	1.56842	0	0.00237023	0	0.0393565	2.08016	0	2.50143	1.81395	0	0.389721	0.16655	0	0	0	0	0	15.5273	6.71656	1.28344	0	8	0.266248	0.165654	0	0.00234193	0.542787	0	2.47155	1.51253	0.0388865
BRGIC 10A	segregation	felsic segregation	Line 2 GIC10AA		43.434	2.56	10.258	17.195	0.292	10.254	11.186	1.714	0.877	0.033	97.803		6.52892	0.28943	1.81721	0	0.00392167	0	0.0371735	2.16131	0	2.29789	1.80139	0	0.499495	0.168159	0	0	0	0	0	15.6049	6.4614	1.5386	0	8	0.25981	0.286437	0	0.00388111	0.470846	0	2.27413	1.66811	0.036789
BRGIC 10A	segregation	felsic segregation	Line 3 GIC10AA		43.086	2.772	10.116	16.919	0.341	10.097	11.174	1.809	0.835		97.149		6.52086	0.315539	1.80429	0	0	0	0.0437081	2.14115	0	2.27817	1.81175	0	0.530781	0.1612	0	0	0	0	0	15.6074	6.46925	1.53075	0	8	0.25926	0.313042	0	0	0.361198	0	2.26014	1.763	0.0433621
BRGIC 10A	segregation	felsic segregation	Line 4 GIC10AA		43.424	2.955	9.998	17.122	0.348	10.242	11.073	1.82	0.77	0.058	97.81		6.52631	0.334031	1.77085	0	0.00689145	0	0.0442951	2.15177	0	2.29481	1.78289	0	0.530295	0.147617	0	0	0	0	0	15.5898	6.46221	1.53779	0	8	0.215659	0.33075	0	0.00682376	0.447359	0	2.27227	1.68327	0.04386
BRGIC 10A	segregation	felsic segregation	Line 5 GIC10AA		43.173	2.914	9.998	17.01	0.335	10.204	10.939	1.762	0.848	0.107	97.29		6.5234	0.331164	1.78035	0	0.0127818	0	0.0428692	2.14916	0	2.29857	1.77077	0	0.51615	0.163443	0	0	0	0	0	15.5887	6.45474	1.54526	0	8	0.216344	0.327678	0	0.0126472	0.479125	0	2.27437	1.64742	0.042418
BRGIC 10A	segregation	felsic segregation	Line 6 GIC10AA		43.266	2.945	10.029	17.051	0.329	9.958	11.11	1.887	0.853	0.053	97.481		6.52916	0.334263	1.7836	0	0.00632312	0	0.042048	2.15161	0	2.24031	1.79617	0	0.552066	0.164198	0	0	0	0	0	15.5997	6.4856	1.5144	0	8	0.257303	0.332032	0	0.00628093	0.304853	0	2.22536	1.8324	0.0417675
BRGIC 10A	segregation	felsic segregation	Line 7 GIC10AA		43.186	2.978	10.011	17.143	0.294	10.101	11.159	1.774	0.789	0.044	97.479		6.51667	0.337986	1.78029	0	0.00524905	0	0.0375724	2.16308	0	2.27233	1.80397	0	0.518973	0.151869	0	0	0	0	0	15.588	6.46042	1.53958	0	8	0.225347	0.335069	0	0.00520374	0.393602	0	2.25272	1.75081	0.0372481
BRGIC 10A	segregation	felsic segregation	Line 8 GIC10AA		43.276	2.867	9.976	17.232	0.314	10.151	11.175	1.816	0.791	0.033	97.631		6.52327	0.325041	1.77217	0	0.00393258	0	0.0400854	2.17199	0	2.28114	1.80463	0	0.530692	0.152091	0	0	0	0	0	15.605	6.46478	1.53522	0	8	0.221054	0.322126	0	0.00389731	0.408767	0	2.26069	1.74374	0.039726
BRGIC 10A	segregation	felsic segregation	Line 9 GIC10AA		43.408	2.899	9.96	17.182	0.36	10.164	11.212	1.738	0.811	0.055	97.789		6.53019	0.328017	1.76582	0	0.00654129	0	0.0458667	2.16139	0	2.27953	1.80701	0	0.50689	0.155627	0	0	0	0	0	15.5869	6.47177	1.52823	0	8	0.221788	0.325082	0	0.00648277	0.407831	0	2.25914	1.73422	0.0454563
BRGIC 10A	segregation	felsic segregation	Line 10 GIC10AA		43.34	2.938	10.001	17.029	0.353	10.202	11.121	1.76	0.839	0.036	97.619		6.52691	0.332784	1.77498	0	0.00428614	0	0.0450228	2.14443	0	2.29049	1.79426	0	0.513854	0.161172	0	0	0	0	0	15.5882	6.46776	1.53224	0	8	0.226645	0.329768	0	0.00424729	0.413138	0	2.26973	1.71185	0.0446147
BRGIC 10A	segregation	felsic segregation	Line 12 GIC10AA		43.633	2.701	10.134	17.368	0.321	10.074	11.298	1.735	0.844	0.02	98.128		6.54192	0.304584	1.79061	0	0.00237064	0	0.04076	2.17742	0	2.25173	1.81474	0	0.504311	0.161414	0	0	0	0	0	15.5899	6.48733	1.51267	0	8	0.262993	0.302042	0	0.00235085	0.380691	0	2.23294	1.77856	0.0404198
BRGIC 10A	segregation	felsic segregation	Line 13 GIC10AA		43.488	2.232	10.125	17.379	0.287	10.328	11.109	1.659	0.841	0.031	97.479		6.55941	0.25321	1.79978	0	0.00369659	0	0.036662	2.19191	0	2.3224	1.79511	0	0.485121	0.161808	0	0	0	0	0	15.6091	6.47618	1.52382	0	8	0.253127	0.249997	0	0.00364969	0.576249	0	2.29293	1.58785	0.0361968
BRGIC 10A	segregation	felsic segregation	Line 14 GIC10AA		43.372	1.897	10.266	17.651	0.309	10.105	11.197	1.708	0.887	0.063	97.455		6.55756	0.215721	1.82921	0	0.00753041	0	0.0395667	2.23154	0	2.27769	1.81366	0	0.500644	0.171067	0	0	0	0	0	15.6442	6.47841	1.52159	0	8	0.285548	0.213117	0	0.00743952	0.548515	0	2.2502	1.65609	0.0390892
BRGIC 10A	segregation	felsic segregation	Line 15 GIC10AA		44.135	1.626	10.066	16.951	0.311	10.582	11.255	1.559	0.871	0.034	97.39		6.63952	0.183978	1.7846	0	0.00404368	0	0.0396235	2.13232	0	2.37326	1.81393	0	0.454682	0.16714	0	0	0	0	0	15.5931	6.56012	1.43988	0	8	0.323376	0.181778	0	0.00399533	0.543511	0	2.34488	1.56331	0.0391496
BRGIC 10A	segregation	felsic segregation	Line 16 GIC10AA		44.262	2.155	9.48	16.883	0.284	10.557	11.215	1.49	0.834	0.041	97.201		6.66858	0.244197	1.68322	0	0.0048835	0	0.0362376	2.12694	0	2.3712	1.81019	0	0.435208	0.160279	0	0	0	0	0	15.5409	6.59991	1.40009	0	8	0.2658	0.241683	0	0.00483321	0.46876	0	2.34678	1.63628	0.0358645
BRGIC 10A	segregation	felsic segregation	Line 17 GIC10AA		46.704	1.65	7.356	15.866	0.296	11.992	11.129	1.318	0.655		96.966		6.97948	0.185458	1.29551	0	0	0	0.0374627	1.98262	0	2.67168	1.78175	0	0.38185	0.124859	0	0	0	0	0	15.4407	6.8987	1.1013	0	8	0.179219	0.183311	0	0	0.52619	0	2.64077	1.43348	0.0370292
BRGIC 10A	segregation	felsic segregation	Line 18 GIC10AA		47.356	1.419	7.136	15.409	0.261	12.354	11.416	1.114	0.544	0.035	97.044		7.04141	0.158693	1.25046	0	0.00411432	0	0.0328673	1.91585	0	2.73853	1.81853	0	0.321128	0.103179	0	0	0	0	0	15.3848	6.96537	1.03463	0	8	0.202322	0.15698	0	0.00406988	0.49141	0	2.70895	1.40375	0.0325123
BRGIC 10A	segregation	felsic segregation	Line 19 GIC10AA		48.553	1.14	6.24	14.699	0.286	13.202	11.541	0.989	0.489		97.139		7.17218	0.126658	1.0863	0	0	0	0.03578	1.81562	0	2.90737	1.82642	0	0.28323	0.092141	0	0	0	0	0	15.3457	7.09365	0.906346	0	8	0.168061	0.125271	0	0	0.498123	0	2.87553	1.29762	0.0353882
BRGIC 10A	segregation	felsic segregation	Line 20 GIC10AA		49.344	0.891	6.018	14.279	0.325	13.339	11.406	0.959	0.408		96.969		7.26682	0.0986915	1.04446	0	0	0	0.0405352	1.75837	0	2.92859	1.79956	0	0.273802	0.0766442	0	0	0	0	0	15.2875	7.19078	0.809219	0	8	0.224313	0.0976588	0	0	0.47632	0	2.89794	1.26365	0.040111
BR GIC 10b	segregation	felsic segregation	10b1 11		45.226	0.898	7.461	16.235	0.393	12.119	11.419	1.147	0.648		95.546		6.90124	0.103064	1.34173	0	0	0	0.0507891	2.07155	0	2.75696	1.86676	0	0.339321	0.126131	0	0	0	0	0	15.5576	6.78366	1.21634	0	8	0.10253	0.101308	0	0	0.770408	0	2.70999	1.26584	0.0499237
BR GIC 10b	segregation	felsic segregation	10b1 12		47.414	0.778	5.793	15.653	0.377	13.186	11.681	0.908	0.38	0.002	96.172		7.1302	0.0879968	1.02667	0	0.000237777	0	0.0480148	1.96832	0	2.9562	1.8819	0	0.264722	0.0728934	0	0	0	0	0	15.4372	7.0128	0.9872	0	8	0.0225612	0.0865479	0	0.000233862	0.744948	0	2.90752	1.19096	0.0472242
BR GIC 10b	segregation	felsic segregation	10b1 13		47.542	0.99	5.885	16.384	0.379	12.921	11.295	1.025	0.53		96.951		7.11463	0.11143	1.03789	0	0	0	0.0480344	2.05021	0	2.88268	1.81085	0	0.297377	0.101172	0	0	0	0	0	15.4543	6.9831	1.0169	0	8	0.0017977	0.10937	0	0	0.834717	0	2.82938	1.17759	0.0471464
BR GIC 10b	segregation	felsic segregation	10b1 14		48.111	0.859	5.803	15.158	0.391	13.3	11.592	0.954	0.391		96.559		7.17612	0.0963675	1.02007	0	0	0	0.0493925	1.89056	0	2.95748	1.85236	0	0.275868	0.0743928	0	0	0	0	0	15.3926	7.07276	0.927243	0	8	0.0781297	0.0949794	0	0	0.653034	0	2.91488	1.21029	0.048681
BR GIC 10b	segregation	felsic segregation	10b1 15		48.039	0.704	6.155	15.3	0.347	13.191	11.691	0.89	0.459		96.776		7.15372	0.0788501	1.08018	0	0	0	0.0437629	1.90516	0	2.92847	1.86514	0	0.256943	0.0871885	0	0	0	0	0	15.3994	7.05059	0.949407	0	8	0.115202	0.0777135	0	0	0.653543	0	2.88625	1.22416	0.043132
BR GIC 10b	segregation	felsic segregation	10b1 16		47.463	0.779	7.02	15.749	0.334	12.528	11.688	0.974	0.522	0.072	97.129		7.06475	0.087211	1.23143	0	0.00847265	0	0.0421043	1.96019	0	2.78002	1.86382	0	0.281066	0.0991109	0	0	0	0	0	15.4182	6.97135	1.02865	0	8	0.186494	0.0860579	0	0.00836063	0.600136	0	2.74327	1.33414	0.0415477
BR GIC 10b	segregation	felsic segregation	10b1 17		47.71	1.104	5.987	16.153	0.377	12.799	11.487	0.956	0.56	0.098	97.231		7.11269	0.12379	1.05187	0	0.0115504	0	0.0475997	2.01363	0	2.84463	1.83465	0	0.276306	0.106493	0	0	0	0	0	15.4232	7.00186	0.998137	0	8	0.0373473	0.121861	0	0.0113704	0.70557	0	2.8003	1.27669	0.0468581
BR GIC 10b	segregation	felsic segregation	10b1 18		48.065	1.071	5.71	15.502	0.445	13.026	11.346	1.031	0.525	0.048	96.769		7.17201	0.120197	1.0041	0	0.00566237	0	0.0562355	1.93421	0	2.89766	1.81375	0	0.298249	0.0999264	0	0	0	0	0	15.402	7.06866	0.931343	0	8	0.0582899	0.118465	0	0.00558077	0.653334	0	2.85591	1.253	0.0554251
BR GIC 10b	segregation	felsic segregation	10b1 19		48.278	0.886	5.656	15.293	0.421	13.396	11.391	0.922	0.416		96.659		7.1933	0.0992897	0.993158	0	0	0	0.0531251	1.90535	0	2.97563	1.81829	0	0.266329	0.0790644	0	0	0	0	0	15.3835	7.07367	0.926328	0	8	0.0503132	0.0976385	0	0	0.752269	0	2.92614	1.12139	0.0522416
BR GIC 10b	px amp gabbro	upper gabbro close to segregation	10b7 1		44.645	1.56	8.664	17.143	0.393	11.086	11.554	1.377	0.826	0.094	97.342		6.73341	0.176962	1.53997	0	0.0112082	0	0.0501988	2.16198	0	2.49266	1.86688	0	0.402629	0.15891	0	0	0	0	0	15.5948	6.64832	1.35168	0	8	0.168826	0.174725	0	0.0110665	0.573967	0	2.46115	1.56069	0.0495645
BR GIC 10b	px amp gabbro	upper gabbro close to segregation	10b7 2		51.779	0.488	3.187	13.285	0.362	15.252	12.155	0.473	0.21	0.072	97.263		7.54801	0.0535045	0.547508	0	0.00829767	0	0.0446916	1.61936	0	3.31459	1.89826	0	0.133674	0.0390487	0	0	0	0	0	15.2069	7.46988	0.530118	0	8	0.0117234	0.0529507	0	0.00821178	0.471195	0	3.28029	1.1314	0.044229
BR GIC 10b	px amp gabbro	upper gabbro close to segregation	10b7 4		45.934	1.665	7.517	16.593	0.354	11.586	11.62	1.268	0.714	0.157	97.408		6.88587	0.187729	1.328	0	0.0186067	0	0.0449435	2.07995	0	2.5893	1.86618	0	0.368512	0.136531	0	0	0	0	0	15.5056	6.81541	1.18459	0	8	0.129821	0.185808	0	0.0184163	0.46589	0	2.56281	1.59277	0.0444836
BR GIC 10b	px amp gabbro	upper gabbro close to segregation	10b7 5		43.281	2.365	9.29	17.731	0.401	10.166	11.564	1.63	0.943	0.13	97.501		6.56689	0.269889	1.66115	0	0.0155938	0	0.0515283	2.24957	0	2.29952	1.87972	0	0.479467	0.182509	0	0	0	0	0	15.6558	6.50974	1.49026	0	8	0.156426	0.26754	0	0.015458	0.396886	0	2.27951	1.8331	0.0510798
BR GIC 10b	px amp gabbro	upper gabbro close to segregation	10b7 6		43.469	2.143	9.545	17.904	0.353	10.289	11.47	1.542	1.021		97.736		6.57418	0.243767	1.70125	0	0	0	0.0452142	2.2642	0	2.31985	1.85843	0	0.452121	0.196968	0	0	0	0	0	15.656	6.49995	1.50005	0	8	0.181989	0.241015	0	0	0.513507	0	2.29366	1.72513	0.0447037
BR GIC 10b	px amp gabbro	upper gabbro close to segregation	10b7 7		48.373	0.936	6.274	15.346	0.358	13.1	11.707	1.001	0.506		97.601		7.1436	0.103964	1.09191	0	0	0	0.044775	1.89501	0	2.8841	1.85217	0	0.286587	0.0953177	0	0	0	0	0	15.3974	7.05494	0.945057	0	8	0.133306	0.102673	0	0	0.563782	0	2.84831	1.30771	0.0442193
BR GIC 10b	px amp gabbro	upper gabbro close to segregation	10b7 8		42.389	1.817	9.565	17.823	0.347	10.406	11.462	1.507	0.986	0.015	96.317		6.52062	0.210224	1.73401	0	0.0018242	0	0.0452068	2.29256	0	2.38641	1.88894	0	0.449425	0.193474	0	0	0	0	0	15.7227	6.42628	1.57372	0	8	0.1352	0.207183	0	0.00179781	0.655908	0	2.35188	1.60348	0.0445528
BR GIC 10b	px amp gabbro	upper gabbro close to segregation	10b7 9		51.515	0.779	3.591	13.711	0.369	14.864	11.824	0.676	0.286	0.01	97.625		7.49884	0.0852884	0.616036	0	0.00115081	0	0.045491	1.66891	0	3.22568	1.84394	0	0.190772	0.053105	0	0	0	0	0	15.2292	7.41816	0.581842	0	8	0.0275651	0.0843707	0	0.00113843	0.489618	0	3.19097	1.16133	0.0450015
BR GIC 10c	px amp gabbro	upper gabbro close to segregation	10c7 3px		48.823	1.257	6.806	12.139	0.224	14.783	12.278	1.079	0.382		97.771		7.08963	0.137286	1.16472	0	0	0	0.0275477	1.47396	0	3.20027	1.91007	0	0.303759	0.0707573	0	0	0	0	0	15.378	7.03905	0.960949	0	8	0.195461	0.136307	0	0	0.325808	0	3.17744	1.13763	0.0273512
BR GIC 10c	px amp gabbro	upper gabbro close to segregation	10c7 5px		44.007	1.449	10.752	13.629	0.232	12.715	11.961	1.609	0.837	0.021	97.212		6.54351	0.16205	1.88412	0	0.00246861	0	0.0292157	1.69456	0	2.81858	1.90537	0	0.463824	0.158754	0	0	0	0	0	15.6624	6.4765	1.5235	0	8	0.341329	0.160391	0	0.00244334	0.466208	0	2.78972	1.211	0.0289165
BR GIC 10c	px amp gabbro	upper gabbro close to segregation	10c7 6px		49.455	0.756	6.105	11.324	0.193	15.844	12.283	0.955	0.369		97.284		7.1804	0.0825567	1.04461	0	0	0	0.023732	1.37481	0	3.42948	1.91058	0	0.268813	0.0683398	0	0	0	0	0	15.3833	7.10628	0.893715	0	8	0.140113	0.0817045	0	0	0.469905	0	3.39408	0.89071	0.023487
BR GIC 10c	px amp gabbro	upper gabbro close to segregation	10c7 7px		49.252	0.835	6.319	11.146	0.253	15.683	12.292	0.942	0.349		97.071		7.1628	0.091335	1.08302	0	0	0	0.0311615	1.35544	0	3.40027	1.91515	0	0.265594	0.0647431	0	0	0	0	0	15.3695	7.09511	0.904892	0	8	0.167896	0.0904719	0	0	0.430621	0	3.36813	0.912012	0.030867
BR GIC 10c	px amp gabbro	upper gabbro close to segregation	10c7 11px		50.269	0.687	5.314	10.801	0.194	16.171	12.523	0.876	0.266	0.039	97.14		7.28304	0.074862	0.907328	0	0.00446706	0	0.0238042	1.30852	0	3.49281	1.94376	0	0.246051	0.049159	0	0	0	0	0	15.3338	7.2303	0.769698	0	8	0.131059	0.0743198	0	0.00443471	0.330709	0	3.46751	0.968334	0.0236318
BR GIC 10c	px amp gabbro	upper gabbro close to segregation	10c7 12px		49.07	0.973	6.399	11.246	0.231	15.339	12.197	0.932	0.395	0.022	96.804		7.15982	0.10678	1.10034	0	0.00253778	0	0.0285455	1.37211	0	3.33663	1.90661	0	0.26364	0.0735178	0	0	0	0	0	15.3505	7.1015	0.8985	0	8	0.19288	0.10591	0	0.00251711	0.371667	0	3.30945	0.989261	0.0283129
BR GIC 10c	px amp gabbro	upper gabbro close to segregation	10c7 13px		51.003	0.708	5.101	10.341	0.2	16.376	12.41	0.704	0.253	0.026	97.122		7.35521	0.0767935	0.866932	0	0.00296427	0	0.0244269	1.247	0	3.52073	1.91731	0	0.196825	0.0465403	0	0	0	0	0	15.2547	7.30238	0.697618	0	8	0.163087	0.0762419	0	0.00294298	0.328029	0	3.49544	0.91001	0.0242514
BR GIC 10c	px amp gabbro	upper gabbro close to segregation	10c8 6px		42.619	1.46	10.626	15.41	0.233	11.524	11.962	1.524	0.905	0.091	96.354		6.47196	0.166754	1.90166	0	0.0109249	0	0.0299659	1.95676	0	2.60892	1.94607	0	0.448669	0.175303	0	0	0	0	0	15.717	6.39962	1.60038	0	8	0.280024	0.164891	0	0.0108028	0.508391	0	2.57976	1.4265	0.029631
BR GIC 10c	px amp gabbro	upper gabbro close to segregation	10c8 7px		44.307	1.33	9.33	14.995	0.254	12.489	11.963	1.423	0.792		96.883		6.65265	0.150199	1.65095	0	0	0	0.0322994	1.88266	0	2.7956	1.92435	0	0.414224	0.15169	0	0	0	0	0	15.6546	6.56959	1.43041	0	8	0.19993	0.148323	0	0	0.567162	0	2.7607	1.29199	0.0318962
BR GIC 10c	px amp gabbro	upper gabbro close to segregation	10c8 8px		50.26	0.432	3.972	11.478	0.264	16.338	12.342	0.675	0.203	0.033	95.997		7.39047	0.0477777	0.688318	0	0.00383626	0	0.032877	1.4113	0	3.58157	1.94427	0	0.192425	0.0380763	0	0	0	0	0	15.3309	7.30275	0.680148	0.0170971	8	0	0.0301135	0	0.00379073	0.539493	0	3.53906	0.855056	0.0324868
BR GIC 10c	px amp gabbro	upper gabbro close to segregation	10c8 11px		45.648	1.487	7.237	13.967	0.279	13.364	12.078	1.32	0.595	0.028	96.003		6.87126	0.168352	1.28382	0	0.0033321	0	0.0355679	1.75801	0	2.999	1.94774	0	0.38521	0.114246	0	0	0	0	0	15.5665	6.80876	1.19124	0	8	0.0808986	0.16682	0	0.00330179	0.41463	0	2.97172	1.32739	0.0352443
BR GIC 10c	px amp gabbro	upper gabbro close to segregation	10c8 13px		43.243	1.469	9.95	15.89	0.28	11.625	11.654	1.618	0.828		96.557		6.55536	0.167492	1.7776	0	0	0	0.0359482	2.01422	0	2.62723	1.89268	0	0.475519	0.160111	0	0	0	0	0	15.7062	6.46688	1.53312	0	8	0.220493	0.165232	0	0	0.612456	0	2.59177	1.37458	0.035463
BR GIC 10c	segregation	felsic segregation	10c5 9		43.986	1.152	9.322	17.599	0.297	11.042	11.586	1.392	0.922	0.022	97.32		6.65626	0.131117	1.66247	0	0.00263199	0	0.0380637	2.22693	0	2.49108	1.87833	0	0.408379	0.177974	0	0	0	0	0	15.6732	6.55116	1.44884	0	8	0.187381	0.129047	0	0.00259043	0.714877	0	2.45175	1.47689	0.0374627
BR GIC 10c	segregation	felsic segregation	10c5 10		48.035	1.045	6.059	15.458	0.335	13.282	11.624	0.989	0.468		97.295		7.12439	0.116573	1.05906	0	0	0	0.0420798	1.91711	0	2.93683	1.847	0	0.284377	0.0885411	0	0	0	0	0	15.416	7.01855	0.981448	0	8	0.0618797	0.114841	0	0	0.673228	0	2.8932	1.2154	0.0414547
BR GIC 10c	segregation	felsic segregation	10c5 11		48.392	1.046	5.475	15.263	0.318	13.645	11.631	0.971	0.432	0.096	97.269		7.17143	0.116589	0.956195	0	0.0112473	0	0.0399115	1.89137	0	3.01461	1.84659	0	0.278972	0.081663	0	0	0	0	0	15.4086	7.06205	0.937947	0	8	0.00366467	0.11481	0	0.0110758	0.690892	0	2.96863	1.17163	0.0393028
BR GIC 10c	segregation	felsic segregation	10c5 12		43.516	2.015	8.982	17.814	0.347	10.672	11.494	1.64	0.96	0.006	97.446		6.60361	0.229985	1.60633	0	0.000719828	0	0.0445965	2.26046	0	2.41437	1.86864	0	0.482486	0.185829	0	0	0	0	0	15.697	6.52329	1.47671	0	8	0.110082	0.227188	0	0.000711072	0.552732	0	2.385	1.68023	0.044054
BR GIC 10c	segregation	felsic segregation	10c5 13		48.428	0.95	6.453	15.623	0.346	13.068	11.778	1.037	0.532	0.006	98.221		7.11718	0.105009	1.11764	0	0.00069712	0	0.0430651	1.9199	0	2.86316	1.8544	0	0.29546	0.0997314	0	0	0	0	0	15.4162	7.0271	0.972905	0	8	0.130592	0.10368	0	0.000688296	0.574838	0	2.82692	1.32076	0.0425201
BR GIC 10c	segregation	felsic segregation	10c5 14		48.518	0.909	6.504	15.964	0.334	12.823	11.761	0.95	0.507	0.054	98.324		7.12782	0.100441	1.12607	0	0.00627181	0	0.0415565	1.9611	0	2.80846	1.85106	0	0.270574	0.0950104	0	0	0	0	0	15.3884	7.0349	0.965102	0	8	0.146286	0.0991313	0	0.00619004	0.591873	0	2.77185	1.34366	0.0410148
BR GIC 10c	segregation	felsic segregation	10c5 15		47.685	1.171	6.47	16.231	0.365	12.651	11.658	1.083	0.557	0.004	97.875		7.06628	0.130514	1.12991	0	0.000468612	0	0.0458079	2.01121	0	2.79485	1.85078	0	0.311133	0.105287	0	0	0	0	0	15.4462	6.97028	1.02972	0	8	0.0848409	0.128741	0	0.000462246	0.616406	0	2.75688	1.36748	0.0451856
BR GIC 10c	segregation	felsic segregation	10c5 16		43.381	2.223	9.5	18.314	0.311	9.96	11.494	1.662	0.959	0.082	97.886		6.56599	0.253065	1.69455	0	0.00981204	0	0.0398657	2.31786	0	2.24742	1.86378	0	0.487686	0.185152	0	0	0	0	0	15.6652	6.50169	1.49831	0	8	0.179646	0.250587	0	0.00971596	0.446064	0	2.22541	1.8491	0.0394753
BR GIC 10c	segregation	felsic segregation	10c5 17		43.731	2.062	9.391	18.197	0.341	10.076	11.436	1.628	1.016	0.129	98.007		6.60321	0.234178	1.67112	0	0.0153993	0	0.0436072	2.29757	0	2.26819	1.84996	0	0.476572	0.19569	0	0	0	0	0	15.6555	6.5362	1.4638	0	8	0.190366	0.231802	0	0.015243	0.462037	0	2.24517	1.81222	0.0431648
BR GIC 10c	segregation	felsic segregation	10c5 18		48.624	0.958	6.182	15.673	0.298	12.978	11.734	0.97	0.494	0.023	97.934		7.16081	0.106113	1.07293	0	0.00267784	0	0.0371678	1.93004	0	2.84934	1.85131	0	0.276944	0.0927999	0	0	0	0	0	15.3801	7.07424	0.925756	0	8	0.134202	0.10483	0	0.00264547	0.549388	0	2.81489	1.35732	0.0367185
BR GIC 10c	segregation	felsic segregation	10c5 19		48.507	0.854	5.988	15.825	0.333	13.053	11.575	0.981	0.463	0.008	97.587		7.174	0.0949962	1.04368	0	0.000935388	0	0.04171	1.95706	0	2.87801	1.834	0	0.281277	0.0873467	0	0	0	0	0	15.393	7.07045	0.929551	0	8	0.0990677	0.0936251	0	0.000921887	0.654365	0	2.83647	1.27444	0.0411079
BR GIC 10c	segregation	felsic segregation	10c5 20		48.894	0.893	5.787	15.755	0.299	13.103	11.841	0.933	0.45		97.955		7.19951	0.0988987	1.00422	0	0	0	0.037287	1.93985	0	2.87636	1.86792	0	0.266341	0.0845218	0	0	0	0	0	15.3749	7.11407	0.885931	0	8	0.106376	0.097725	0	0	0.539429	0	2.84222	1.3774	0.0368445
BR GIC 10c	segregation	felsic segregation	10c5 21		48.551	0.929	5.875	15.872	0.321	13.128	11.714	1.036	0.461		97.887		7.16514	0.103118	1.0218	0	0	0	0.0401209	1.95867	0	2.88835	1.85205	0	0.296411	0.0867833	0	0	0	0	0	15.4124	7.06879	0.931211	0	8	0.0768452	0.101731	0	0	0.610246	0	2.84951	1.32209	0.0395814
BR GIC 10c	segregation	felsic segregation	10c5 22		49.294	0.861	5.551	15.572	0.332	13.286	11.555	0.978	0.371		97.8		7.25055	0.0952515	0.962229	0	0	0	0.0413575	1.91525	0	2.91337	1.82083	0	0.278884	0.0696081	0	0	0	0	0	15.3473	7.15261	0.847389	0	8	0.101842	0.0939649	0	0	0.612974	0	2.87402	1.2764	0.0407988
BR GIC 10c	segregation	felsic segregation	10c11 8		50.504	0.676	4.563	11.694	0.226	15.986	12.239	0.651	0.283		96.822		7.36039	0.0740992	0.78371	0	0	0	0.0278947	1.42509	0	3.47328	1.91092	0	0.183935	0.0526103	0	0	0	0	0	15.2919	7.2795	0.720502	0	8	0.0545949	0.0732848	0	0	0.499995	0	3.43511	0.909429	0.0275882
BR GIC 10c	segregation	felsic segregation	10c11 9		51.33	0.384	3.73	11.097	0.283	16.5	12.454	0.632	0.228		96.638		7.46977	0.04203	0.639698	0	0	0	0.0348788	1.35034	0	3.57968	1.94163	0	0.178304	0.0423233	0	0	0	0	0	15.2787	7.40348	0.596523	0	8	0.0374975	0.041657	0	0	0.40462	0	3.54792	0.933741	0.0345692
BR GIC 8	px gabbro	upper gabbro	82 1		43.9	1.645	9.528	19.6	0.163	9.722	11.203	1.606	0.899	0.055	98.321		6.62811	0.186803	1.69534	0	0.00656497	0	0.0208426	2.47448	0	2.18829	1.8121	0	0.470088	0.173138	0	0	0	0	0	15.6558	6.52747	1.47253	0	8	0.197066	0.183966	0	0.00646529	0.68784	0	2.15507	1.74907	0.0205261
BR GIC 8	px gabbro	upper gabbro	82 3		44.134	1.48	9.876	18.798	0.178	10.066	11.429	1.579	0.867	0.107	98.514		6.62226	0.167027	1.7464	0	0.0126929	0	0.02262	2.35857	0	2.25172	1.83723	0	0.459329	0.165944	0	0	0	0	0	15.6438	6.53118	1.46882	0	8	0.253564	0.16473	0	0.0125184	0.623982	0	2.22075	1.70214	0.0223089
BRGIC9A	px amp gabbro	upper gabbro	BRGIC9A24		44.325	2.24	10.854	12.929	0.127	12.56	11.125	2.079	0.61	0.172	97.021		6.56131	0.249391	1.89348	0	0.0201287	0	0.0159215	1.60033	0	2.77176	1.76426	0	0.596629	0.115181	0	0	0	0	0	15.5884	6.5051	1.4949	0	8	0.382363	0.247255	0	0.0199562	0.390682	0	2.74802	1.19594	0.0157851
BRGIC9A	px amp gabbro	upper gabbro	BRGIC9A25		44.298	2.281	11.214	12.93	0.114	12.551	11.248	1.984	0.634	0.129	97.383		6.53106	0.25294	1.94845	0	0.0150361	0	0.0142345	1.59405	0	2.75869	1.77663	0	0.567087	0.119233	0	0	0	0	0	15.5774	6.47406	1.52594	0	8	0.405506	0.250732	0	0.0149048	0.397987	0	2.73461	1.18215	0.0141103
BRGIC9A	px amp gabbro	upper gabbro	BRGIC9A26		44.513	2.428	10.599	12.89	0.15	13.427	11.19	2.058	0.644	0.008	97.907		6.5318	0.26797	1.83291	0	0.00092807	0	0.0186413	1.58162	0	2.93731	1.75913	0	0.585463	0.120543	0	0	0	0	0	15.6363	6.44691	1.55309	0	8	0.255997	0.264488	0	0.000916009	0.590066	0	2.89914	0.970998	0.018399
BRGIC9A	px amp gabbro	upper gabbro	BRGIC9A27		43.685	2.675	11.421	13.167	0.106	12.753	10.961	2.222	0.64	0.024	97.654		6.43954	0.296578	1.98407	0	0.00279691	0	0.0132333	1.62298	0	2.80259	1.73099	0	0.635002	0.12034	0	0	0	0	0	15.6481	6.36038	1.63962	0	8	0.320066	0.292932	0	0.00276253	0.55849	0	2.76814	1.04454	0.0130706
BRGIC9A	px amp gabbro	upper gabbro	BRGIC9A28		43.4	2.76	11.403	13.252	0.118	12.642	10.941	2.304	0.597	0.03	97.447		6.41894	0.307026	1.98757	0	0.00350784	0	0.0147807	1.63892	0	2.7875	1.73361	0	0.660639	0.112631	0	0	0	0	0	15.6651	6.34174	1.65826	0	8	0.305414	0.303333	0	0.00346565	0.546555	0	2.75397	1.07266	0.0146029
BRGIC9A	px amp gabbro	upper gabbro	BRGIC9A29		43.393	2.641	11.513	13.13	0.103	12.775	11.153	2.144	0.597	0.032	97.481		6.41133	0.293487	2.00469	0	0.00373786	0	0.0128886	1.62217	0	2.81394	1.7654	0	0.614132	0.112515	0	0	0	0	0	15.6543	6.3323	1.6677	0	8	0.312283	0.289869	0	0.00369179	0.560032	0	2.77925	1.04214	0.0127297
BRGIC9A	px amp gabbro	upper gabbro	BRGIC9A30		44.679	2.312	10.806	12.69	0.156	13.412	11.082	2.04	0.529		97.706		6.55102	0.254968	1.86724	0	0	0	0.0193717	1.55586	0	2.93173	1.74079	0	0.579888	0.0989396	0	0	0	0	0	15.5998	6.46146	1.53854	0	8	0.303173	0.251482	0	0	0.620283	0	2.89165	0.914306	0.0191069
BRGIC9A	px amp gabbro	upper gabbro	Line 1 9AAmp4		44.036	2.772	11.346	12.748	0.131	12.945	11.262	2.094	0.595		97.929		6.45761	0.305738	1.96082	0	0	0	0.0162695	1.56318	0	2.83003	1.7693	0	0.595318	0.111299	0	0	0	0	0	15.6096	6.3919	1.6081	0	8	0.332763	0.302627	0	0	0.463302	0	2.80123	1.08397	0.0161039
BRGIC9A	px amp gabbro	upper gabbro	Line 2 9AAmp4		43.518	3.089	11.435	12.938	0.11	12.662	10.971	2.271	0.562	0.049	97.605		6.41378	0.342417	1.98615	0	0.00570934	0	0.0137302	1.59447	0	2.7821	1.73226	0	0.648889	0.105655	0	0	0	0	0	15.6251	6.34624	1.65376	0	8	0.311476	0.338811	0	0.00564922	0.479271	0	2.7528	1.09841	0.0135856
BRGIC9A	px amp gabbro	upper gabbro	Line 3 9AAmp4		43.145	3.258	11.287	13.518	0.161	12.415	11.118	2.32	0.62	0.018	97.86		6.37466	0.362051	1.96533	0	0.00210254	0	0.0201461	1.6701	0	2.73463	1.75985	0	0.664543	0.11685	0	0	0	0	0	15.6703	6.31202	1.68798	0	8	0.258035	0.358493	0	0.00208188	0.447614	0	2.70776	1.20607	0.0199481
BRGIC9A	px amp gabbro	upper gabbro	Line 4 9AAmp4		43.202	3.233	11.292	12.966	0.115	12.584	11.247	2.217	0.627	0.005	97.488		6.38867	0.359587	1.96792	0	0.000584549	0	0.0144027	1.6033	0	2.77428	1.78182	0	0.635595	0.118272	0	0	0	0	0	15.6444	6.33567	1.66433	0	8	0.287266	0.356604	0	0.0005797	0.378409	0	2.75126	1.21159	0.0142832
BRGIC9A	px amp gabbro	upper gabbro	Line 5 9AAmp4		43.294	3.473	11.419	12.964	0.183	12.457	11.18	2.322	0.627	0.021	97.94		6.37419	0.384587	1.98132	0	0.00244434	0	0.0228185	1.59602	0	2.73424	1.76344	0	0.662778	0.117754	0	0	0	0	0	15.6396	6.32765	1.67235	0	8	0.294504	0.381778	0	0.00242649	0.333451	0	2.71427	1.25092	0.0226519
BRGIC9A	px amp gabbro	upper gabbro	Line 6 9AAmp4		43.244	3.464	11.165	12.967	0.168	12.66	11.052	2.33	0.599	0.007	97.656		6.38457	0.384658	1.94265	0	0.00081705	0	0.0210065	1.60084	0	2.78653	1.74811	0	0.666914	0.112808	0	0	0	0	0	15.6489	6.32565	1.67435	0	8	0.250378	0.381109	0	0.000809511	0.420539	0	2.76082	1.16553	0.0208127
BRGIC9A	px amp gabbro	upper gabbro	Line 7 9AAmp4		43.09	3.48	11.346	12.815	0.099	12.396	11.105	2.345	0.604		97.28		6.38136	0.387622	1.9802	0	0	0	0.0124168	1.58693	0	2.7368	1.76188	0	0.673268	0.114099	0	0	0	0	0	15.6346	6.33974	1.66026	0	8	0.307034	0.385094	0	0	0.298058	0	2.71895	1.27853	0.0123359
BRGIC9A	px amp gabbro	upper gabbro	Line 8 9AAmp4		43.194	3.235	11.477	12.928	0.15	12.314	11.096	2.255	0.632		97.281		6.39646	0.360315	2.00297	0	0	0	0.0188125	1.60085	0	2.71857	1.76037	0	0.647398	0.119383	0	0	0	0	0	15.6251	6.34861	1.65139	0	8	0.3366	0.35762	0	0	0.34152	0	2.69823	1.24736	0.0186718
BRGIC9A	px amp gabbro	upper gabbro	Line 9 9AAmp4		43.11	3.26	11.724	12.883	0.153	12.221	11.204	2.242	0.691		97.488		6.37281	0.362462	2.04248	0	0	0	0.019155	1.59248	0	2.6933	1.77439	0	0.642535	0.130299	0	0	0	0	0	15.6299	6.33253	1.66747	0	8	0.362107	0.360171	0	0	0.288892	0	2.67628	1.29352	0.019034
BRGIC9A	px amp gabbro	upper gabbro	Line 10 9AAmp4		47.281	1.942	8.712	11.076	0.162	14.646	11.344	1.378	0.41	0.001	96.952		6.8884	0.2128	1.49582	0	0.00011518	0	0.0199887	1.34933	0	3.18109	1.7706	0	0.389215	0.0761946	0	0	0	0	0	15.3835	6.8111	1.1889	0	8	0.290133	0.210413	0	0.000113887	0.510395	0	3.14539	0.823792	0.0197644
BRGIC9A	px amp gabbro	upper gabbro	BRGIC9A51		43.476	2.733	11.588	12.777	0.157	12.588	11.365	2.196	0.706	0.001	97.587		6.41457	0.303284	2.01491	0	0.000116644	0	0.0196181	1.57634	0	2.76885	1.79643	0	0.628143	0.132871	0	0	0	0	0	15.6551	6.36672	1.63328	0	8	0.36661	0.301022	0	0.000115774	0.340556	0	2.7482	1.22403	0.0194717
BRGIC9A	px amp gabbro	upper gabbro	BRGIC9A52		43.74	2.282	11.498	12.444	0.116	12.879	11.361	2.026	0.658		97.004		6.4697	0.253871	2.00428	0	0	0	0.0145312	1.53911	0	2.83996	1.80029	0	0.580969	0.124148	0	0	0	0	0	15.6269	6.40982	1.59018	0	8	0.395546	0.251521	0	0	0.421795	0	2.81368	1.10307	0.0143967
BRGIC9A	px amp gabbro	upper gabbro	BRGIC9A53		43.302	3.13	11.383	12.873	0.136	12.374	11.209	2.293	0.657		97.357		6.40844	0.348402	1.98532	0	0	0	0.017046	1.59304	0	2.7301	1.77719	0	0.657895	0.124028	0	0	0	0	0	15.6415	6.3681	1.6319	0	8	0.340921	0.346209	0	0	0.287744	0	2.71292	1.29527	0.0169387
BRGIC9A	px amp gabbro	upper gabbro	BRGIC9A54		42.96	3.178	11.329	12.919	0.173	12.328	11.002	2.32	0.62	0.016	96.845		6.39511	0.35582	1.98749	0	0.00188299	0	0.0218107	1.60811	0	2.73591	1.7546	0	0.669546	0.117729	0	0	0	0	0	15.648	6.34332	1.65668	0	8	0.314721	0.352938	0	0.00186774	0.369519	0	2.71375	1.22557	0.021634
BRGIC9A	px amp gabbro	upper gabbro	BRGIC9A55		43.631	3.056	10.96	12.648	0.194	12.761	11.041	2.122	0.574	0.057	97.044		6.46104	0.340371	1.91271	0	0.0066731	0	0.0243303	1.56615	0	2.8172	1.75161	0	0.609202	0.108425	0	0	0	0	0	15.5977	6.39782	1.60218	0	8	0.291809	0.33704	0	0.0066078	0.44573	0	2.78963	1.10509	0.0240922
BRGIC9A	px amp gabbro	upper gabbro	BRGIC9A56		43.435	3.342	11.154	12.402	0.159	12.799	10.941	2.078	0.652	0.067	97.029		6.42729	0.371952	1.94513	0	0.00783805	0	0.0199262	1.53456	0	2.82351	1.73447	0	0.596131	0.123068	0	0	0	0	0	15.5839	6.36356	1.63644	0	8	0.289399	0.368263	0	0.00776032	0.451625	0	2.79551	1.06772	0.0197286
BRGIC9A	px amp gabbro	upper gabbro	BRGIC9A57		43.459	3.427	10.938	12.867	0.114	12.542	10.942	2.239	0.617	0.061	97.206		6.43543	0.381684	1.90882	0	0.00714122	0	0.0142969	1.59323	0	2.76878	1.73587	0	0.642776	0.116544	0	0	0	0	0	15.6046	6.38173	1.61827	0	8	0.274625	0.378499	0	0.00708163	0.380615	0	2.74568	1.19932	0.0141776
BRGIC9A	px amp gabbro	upper gabbro	BRGIC9A58		43.113	3.582	11.275	12.838	0.143	12.464	10.929	2.422	0.596	0.048	97.41		6.3778	0.398548	1.96566	0	0.0056137	0	0.0179159	1.58805	0	2.74881	1.73207	0	0.694617	0.112465	0	0	0	0	0	15.6416	6.32796	1.67204	0	8	0.278257	0.395433	0	0.00556982	0.356704	0	2.72733	1.21893	0.0177758
BRGIC9A	px amp gabbro	upper gabbro	BRGIC9A59		42.898	3.643	11.547	12.285	0.129	12.586	11.179	2.346	0.643	0.012	97.268		6.3447	0.405252	2.01267	0	0.00140314	0	0.0161586	1.51933	0	2.77515	1.77133	0	0.672683	0.121309	0	0	0	0	0	15.64	6.30847	1.69153	0	8	0.309645	0.402938	0	0.00139512	0.261238	0	2.7593	1.24942	0.0160663
BRGIC9A	px amp gabbro	upper gabbro	BRGIC9A60		43.383	3.434	11.097	11.955	0.185	12.901	11.108	2.207	0.604		96.874		6.42258	0.382368	1.93609	0	0	0	0.0231953	1.47993	0	2.84733	1.76176	0	0.633433	0.114061	0	0	0	0	0	15.6008	6.37769	1.62231	0	8	0.300248	0.379696	0	0	0.319253	0	2.82743	1.15034	0.0230332
BRGIC9A	px amp gabbro	upper gabbro	BRGIC9A61		43.675	3.334	11.114	11.957	0.117	13.092	10.989	2.17	0.608		97.056		6.44376	0.369968	1.93244	0	0	0	0.0146194	1.47513	0	2.87963	1.73695	0	0.620689	0.114424	0	0	0	0	0	15.5876	6.38698	1.61302	0	8	0.302402	0.366708	0	0	0.401705	0	2.85426	1.06043	0.0144906
BRGIC9A	px amp gabbro	upper gabbro	BRGIC9A62		45.546	2.11	9.806	11.374	0.146	14.261	11.337	1.759	0.552	0.029	96.92		6.68372	0.232886	1.69586	0	0.00336443	0	0.0181451	1.39568	0	3.11992	1.78233	0	0.500429	0.103328	0	0	0	0	0	15.5357	6.6077	1.3923	0	8	0.284269	0.230237	0	0.00332616	0.517279	0	3.08443	0.862522	0.0179387
BRGIC9A	px amp gabbro	upper gabbro	BRGIC9A63		45.035	2.337	10.025	11.539	0.186	13.949	11.335	1.934	0.525	0.096	96.961		6.62382	0.258529	1.73769	0	0.0111628	0	0.0231691	1.41915	0	3.05863	1.78608	0	0.551472	0.0984978	0	0	0	0	0	15.5682	6.55716	1.44284	0	8	0.277368	0.255927	0	0.0110505	0.458258	0	3.02785	0.946615	0.022936
BRGIC9A	px amp gabbro	upper gabbro	BRGIC9A64		47.79	1.652	8.148	10.376	0.136	15.629	11.285	1.463	0.449	0.024	96.952		6.93995	0.180435	1.39444	0	0.00275534	0	0.0167262	1.25995	0	3.38357	1.75567	0	0.411881	0.0831715	0	0	0	0	0	15.4285	6.8463	1.1537	0	8	0.221924	0.178	0	0.00271816	0.612354	0	3.33791	0.630591	0.0165005
BRGIC9A	px amp gabbro	upper gabbro	BRGIC9A65		44.977	2.314	10.272	11.461	0.132	13.871	11.233	1.914	0.547		96.721		6.62248	0.256263	1.78244	0	0	0	0.0164605	1.41109	0	3.04483	1.77193	0	0.546362	0.102737	0	0	0	0	0	15.5546	6.55513	1.44487	0	8	0.319444	0.253657	0	0	0.463028	0	3.01386	0.933715	0.0162931
BRGIC9A	px amp gabbro	upper gabbro	BRGIC9A66		46.624	2.083	8.895	10.997	0.079	14.9	11.125	1.621	0.44		96.764		6.815	0.229001	1.53226	0	0	0	0.00977963	1.34411	0	3.24689	1.74212	0	0.459355	0.0820386	0	0	0	0	0	15.4606	6.72344	1.27656	0	8	0.235113	0.225924	0	0	0.609746	0	3.20327	0.716302	0.00964823
BRGIC9A	px amp gabbro	upper gabbro	BRGIC9A74		43.62	2.021	11.693	12.814	0.153	12.606	11.134	1.951	0.682	0.001	96.675		6.47918	0.225784	2.04687	0	0.00011743	0	0.0192471	1.59156	0	2.79149	1.77177	0	0.561824	0.129219	0	0	0	0	0	15.6171	6.4032	1.5968	0	8	0.426073	0.223136	0	0.000116053	0.533081	0	2.75876	1.03981	0.0190214
BRGIC9A	px amp gabbro	upper gabbro	BRGIC9A75		44.94	1.699	10.559	12.537	0.102	13.583	11.138	1.816	0.623		96.997		6.6253	0.18839	1.83453	0	0	0	0.0127354	1.5455	0	2.98534	1.75915	0	0.519035	0.117157	0	0	0	0	0	15.5871	6.52898	1.47102	0	8	0.336836	0.185651	0	0	0.659081	0	2.94193	0.86395	0.0125502
BRGIC9A	px amp gabbro	upper gabbro	BRGIC9A76		44.055	1.785	11.415	12.681	0.092	12.949	11.249	1.874	0.687		96.787		6.52598	0.198875	1.99277	0	0	0	0.0115419	1.57075	0	2.85964	1.7852	0	0.538181	0.129812	0	0	0	0	0	15.6128	6.44685	1.55315	0	8	0.415459	0.196464	0	0	0.550996	0	2.82497	1.00071	0.011402
BRGIC9A	px amp gabbro	upper gabbro	BRGIC9A82		44.253	2.412	11.31	12.962	0.139	12.694	11.105	2.131	0.625	0.011	97.642		6.50851	0.266814	1.96034	0	0.00127902	0	0.0173138	1.59409	0	2.78331	1.74976	0	0.607618	0.117254	0	0	0	0	0	15.6063	6.44325	1.55675	0	8	0.383937	0.264138	0	0.00126619	0.456601	0	2.75541	1.12151	0.0171402
BRGIC9A	px amp gabbro	upper gabbro	BRGIC9A83		43.712	2.485	11.732	13.211	0.126	12.461	11.019	2.192	0.665		97.603		6.4453	0.275588	2.03866	0	0	0	0.0157345	1.62885	0	2.73918	1.74063	0	0.626601	0.125076	0	0	0	0	0	15.6356	6.37502	1.62498	0	8	0.391453	0.272583	0	0	0.496106	0	2.70931	1.11498	0.0155629
BRGIC9A	px amp gabbro	upper gabbro	BRGIC9A84		43.606	2.594	11.541	13.6	0.135	12.267	11.108	2.199	0.687	0.055	97.792		6.4363	0.287973	2.00754	0	0.00641797	0	0.0168757	1.67854	0	2.69931	1.7565	0	0.62925	0.129347	0	0	0	0	0	15.6481	6.37114	1.62886	0	8	0.358351	0.285058	0	0.00635299	0.460978	0	2.67199	1.20057	0.0167049
BRGIC9A	px amp gabbro	upper gabbro	BRGIC9A85		46.777	1.331	9.187	12	0.117	14.246	11.379	1.583	0.475		97.095		6.84413	0.146472	1.58413	0	0	0	0.0144981	1.46815	0	3.10745	1.78366	0	0.44903	0.088652	0	0	0	0	0	15.4862	6.75844	1.24156	0	8	0.322735	0.144639	0	0	0.568729	0	3.06854	0.881039	0.0143166
BRGIC9A	px amp gabbro	upper gabbro	BRGIC9A121		44.733	2.125	10.773	11.633	0.159	13.949	11.329	2.035	0.563	0.058	97.357		6.55736	0.234289	1.86109	0	0.00672161	0	0.0197395	1.42592	0	3.04838	1.77916	0	0.578327	0.105273	0	0	0	0	0	15.6163	6.48083	1.51917	0	8	0.320207	0.231555	0	0.00664318	0.530528	0	3.0128	0.878753	0.0195092
BRGIC9A	px amp gabbro	upper gabbro	BRGIC9A122		45.159	2.219	10.91	11.305	0.114	13.878	11.363	2.062	0.59	0.065	97.665		6.58182	0.243249	1.87394	0	0.00748962	0	0.0140717	1.37777	0	3.01546	1.77426	0	0.582638	0.109689	0	0	0	0	0	15.5804	6.5247	1.4753	0	8	0.382386	0.241138	0	0.00742463	0.395704	0	2.98929	0.970105	0.0139495
BRGIC9A	px amp gabbro	upper gabbro	BRGIC9A123		45.219	2.119	11.173	11.036	0.143	13.961	11.329	2.035	0.562	0.095	97.672		6.57752	0.231827	1.91532	0	0.0109247	0	0.0176163	1.34232	0	3.02749	1.76545	0	0.57387	0.104276	0	0	0	0	0	15.5666	6.51586	1.48414	0	8	0.413226	0.229654	0	0.0108223	0.427155	0	2.99911	0.902582	0.0174512
BRGIC9A	px amp gabbro	upper gabbro	GIC9A89P2		44.234	2.906	11.634	12.452	0.17	12.58	11.322	2.201	0.608	0.051	98.158		6.46255	0.319326	2.00312	0	0.00589064	0	0.0210346	1.52121	0	2.74002	1.77212	0	0.623413	0.113308	0	0	0	0	0	15.582	6.42639	1.57361	0	8	0.4183	0.31754	0	0.00585768	0.25593	0	2.72468	1.25677	0.020917
BRGIC9A	px amp gabbro	upper gabbro	GIC9A90P2		44.84	2.791	11.196	12.432	0.071	12.722	11.293	2.207	0.58	0.011	98.143		6.53923	0.306135	1.92422	0	0.00126823	0	0.00876916	1.51602	0	2.76593	1.76438	0	0.623982	0.107894	0	0	0	0	0	15.5578	6.50841	1.49159	0	8	0.423551	0.304692	0	0.00126225	0.215823	0	2.75289	1.29305	0.00872783
BRGIC9A	px amp gabbro	upper gabbro	GIC9A91P2		44.335	2.922	11.585	12.789	0.115	12.515	11.227	2.187	0.597		98.272		6.4734	0.320891	1.99348	0	0	0	0.0142207	1.56144	0	2.72422	1.75619	0	0.619074	0.111191	0	0	0	0	0	15.5741	6.43005	1.56995	0	8	0.410177	0.318742	0	0	0.305996	0	2.70597	1.24499	0.0141255
BRGIC9A	px amp gabbro	upper gabbro	GIC9A92P3		46.177	2.682	10.172	12.193	0.151	13.398	11.285	1.932	0.535		98.525		6.68089	0.29185	1.73438	0	0	0	0.0185022	1.4751	0	2.88984	1.74917	0	0.541906	0.0987351	0	0	0	0	0	15.4804	6.63467	1.36533	0	8	0.357053	0.289831	0	0	0.316068	0	2.86984	1.14883	0.0183742
BRGIC9A	px amp gabbro	upper gabbro	GIC9A97P2		46.162	1.758	10.944	11.995	0.124	13.874	11.255	1.964	0.488	0.024	98.588		6.65931	0.190746	1.86059	0	0.00273717	0	0.0151497	1.44693	0	2.98381	1.73945	0	0.549281	0.0897995	0	0	0	0	0	15.5378	6.57871	1.42129	0	8	0.416779	0.188437	0	0.00270403	0.550057	0	2.9477	0.879362	0.0149664
BRGIC9A	px amp gabbro	upper gabbro	GIC9A98P2		44.861	2.089	11.279	12.055	0.121	13.323	11.168	1.972	0.604		97.472		6.56743	0.230015	1.94593	0	0	0	0.015002	1.4757	0	2.90773	1.75156	0	0.559683	0.11279	0	0	0	0	0	15.5658	6.49657	1.50343	0	8	0.421502	0.227534	0	0	0.490979	0	2.87635	0.968795	0.0148402
BRGIC9A	px amp gabbro	upper gabbro	GIC9A106P2		46.33	2.673	9.843	12.365	0.115	13.254	11.298	2.035	0.477	0.067	98.457		6.71292	0.2913	1.68076	0	0.00767483	0	0.0141119	1.49812	0	2.863	1.75377	0	0.571639	0.088161	0	0	0	0	0	15.4815	6.67805	1.32195	0	8	0.350079	0.289786	0	0.00763496	0.237735	0	2.84812	1.2526	0.0140386
BRGIC9A	px amp gabbro	upper gabbro	GIC9A110P2		45.704	2.706	10.448	12.555	0.144	12.854	11.238	2.108	0.443	0.177	98.377		6.64023	0.295698	1.78892	0	0.0203304	0	0.0177186	1.52528	0	2.78415	1.7492	0	0.593756	0.0820997	0	0	0	0	0	15.4974	6.60349	1.39651	0	8	0.382519	0.294062	0	0.020218	0.253077	0	2.76874	1.26376	0.0176206
BRGIC9A	px amp gabbro	upper gabbro	GIC9A111P2		45.472	2.254	11.065	11.441	0.171	13.41	11.479	1.955	0.538	0.085	97.87		6.60951	0.246417	1.89543	0	0.00976763	0	0.0210504	1.39057	0	2.90589	1.78752	0	0.55091	0.0997508	0	0	0	0	0	15.5168	6.56977	1.43023	0	8	0.453805	0.244936	0	0.0097089	0.274879	0	2.88842	1.10733	0.0209238
BRGIC9A	px amp gabbro	upper gabbro	GIC9A112P2		45.702	2.437	10.957	11.356	0.108	13.524	11.378	2.016	0.515	0.071	98.064		6.62162	0.265568	1.8709	0	0.00813265	0	0.0132523	1.37581	0	2.92118	1.76611	0	0.566276	0.0951799	0	0	0	0	0	15.504	6.5829	1.4171	0	8	0.44286	0.264015	0	0.0080851	0.267407	0	2.9041	1.10035	0.0131748
BRGIC9A	px amp gabbro	upper gabbro	GIC9A113P2		45.74	2.463	10.477	11.275	0.142	13.798	11.378	1.997	0.538	0.046	97.854		6.64375	0.269075	1.79343	0	0.00528226	0	0.017468	1.36942	0	2.98785	1.77054	0	0.562346	0.0996801	0	0	0	0	0	15.5188	6.59995	1.40005	0	8	0.381557	0.267301	0	0.00524744	0.301251	0	2.96815	1.05914	0.0173529
BR GIC 9b	px amp gabbro	upper gabbro	9b7 1		43.375	2.831	11.138	14.006	0.139	12.295	11.345	2.448	0.539	0.075	98.191		6.40256	0.314301	1.93754	0	0.00875226	0	0.0173767	1.72875	0	2.70562	1.79407	0	0.700541	0.101487	0	0	0	0	0	15.711	6.34646	1.65354	0	8	0.267032	0.311547	0	0.00867558	0.399488	0	2.68192	1.31411	0.0172245
BR GIC 9b	px amp gabbro	upper gabbro	9b7 2		43.557	2.845	11.255	13.681	0.188	12.589	11.147	2.366	0.581	0.035	98.244		6.40936	0.31487	1.95179	0	0.00407165	0	0.023429	1.68336	0	2.76168	1.75726	0	0.674963	0.109054	0	0	0	0	0	15.6898	6.33695	1.66305	0	8	0.26668	0.311312	0	0.00402564	0.513877	0	2.73047	1.15047	0.0231643
BR GIC 9b	px amp gabbro	upper gabbro	9b7 3		43.481	2.827	11.337	13.658	0.164	12.626	11.423	2.374	0.518	0.001	98.409		6.38982	0.312469	1.96344	0	0.000116181	0	0.0204114	1.67834	0	2.76618	1.79842	0	0.676361	0.097102	0	0	0	0	0	15.7027	6.32618	1.67382	0	8	0.270069	0.309357	0	0.000115024	0.453576	0	2.73863	1.20805	0.0202081
BR GIC 9b	px amp gabbro	upper gabbro	9b7 4		43.492	2.76	11.457	13.694	0.166	12.324	11.513	2.465	0.591	0.058	98.52		6.39088	0.305037	1.98405	0	0.0067379	0	0.0206585	1.68262	0	2.69978	1.81243	0	0.702226	0.110777	0	0	0	0	0	15.7152	6.34706	1.65294	0	8	0.317504	0.302945	0	0.00669169	0.313256	0	2.68126	1.35782	0.0205168
BR GIC 9b	px amp gabbro	upper gabbro	9b1 5		45.007	2.43	9.983	13.05	0.161	12.973	11.511	2.167	0.425	0.58	98.287		6.5893	0.267582	1.72246	0	0.0671324	0	0.0199629	1.59762	0	2.83155	1.80549	0	0.615073	0.0793701	0	0	0	0	0	15.5955	6.54119	1.45881	0	8	0.25108	0.265629	0	0.0666423	0.333396	0	2.81088	1.25256	0.0198172
BR GIC 9b	px amp gabbro	upper gabbro	9b1 7		43.345	2.635	11.36	13.706	0.134	12.294	11.398	2.331	0.562	0.311	98.076		6.39735	0.292505	1.97592	0	0.0362883	0	0.0167496	1.69151	0	2.70508	1.80224	0	0.666979	0.105805	0	0	0	0	0	15.6904	6.34106	1.65894	0	8	0.299596	0.289932	0	0.035969	0.401208	0	2.68127	1.27542	0.0166022
BR GIC 9b	px amp gabbro	upper gabbro	9b1 10		44.949	2.35	10.078	13.095	0.126	13.217	11.68	2.09	0.432	0.44	98.457		6.57043	0.258365	1.73611	0	0.0508477	0	0.0155985	1.6006	0	2.88026	1.8291	0	0.592282	0.0805502	0	0	0	0	0	15.6141	6.5142	1.4858	0	8	0.235458	0.256154	0	0.0504126	0.390276	0	2.85561	1.19663	0.015465
BR GIC 9b	px amp gabbro	upper gabbro	9b1 12		44.923	2.416	10.071	12.664	0.125	13.713	11.752	2.223	0.305	0.221	98.413		6.55503	0.265152	1.73184	0	0.0254943	0	0.0154474	1.54518	0	2.98307	1.83713	0	0.628859	0.0567694	0	0	0	0	0	15.644	6.49447	1.50553	0	8	0.210316	0.262702	0	0.0252588	0.421015	0	2.95551	1.10989	0.0153047
BR GIC 9b	px amp gabbro	upper gabbro	9b1 13		49.605	1.355	6.485	11.173	0.157	16.034	11.655	1.419	0.074	0.14	98.097		7.1233	0.146348	1.09748	0	0.0158938	0	0.0190939	1.34162	0	3.43259	1.79304	0	0.395045	0.0135549	0	0	0	0	0	15.378	7.02798	0.972024	0	8	0.110767	0.14439	0	0.0156811	0.607336	0	3.38666	0.716328	0.0188384
BR GIC 9b	px amp gabbro	upper gabbro	9b2 5		44.245	2.302	11.339	12.021	0.127	13.661	11.905	2.168	0.573	0.096	98.437		6.44653	0.252266	1.947	0	0.011058	0	0.0156713	1.46455	0	2.96735	1.85829	0	0.612392	0.106494	0	0	0	0	0	15.6816	6.39515	1.60485	0	8	0.326641	0.250256	0	0.0109699	0.363687	0	2.9437	1.0892	0.0155464
BR GIC 9b	px amp gabbro	upper gabbro	9b2 6		44.334	2.239	11.38	11.657	0.121	13.647	11.865	2.204	0.53	0.059	98.036		6.4699	0.245758	1.95719	0	0.00680703	0	0.014955	1.4225	0	2.96909	1.85503	0	0.623564	0.0986611	0	0	0	0	0	15.6635	6.42729	1.57271	0	8	0.371587	0.244139	0	0.0067622	0.301004	0	2.94953	1.11212	0.0148564
BR GIC 9b	px amp gabbro	upper gabbro	9b2 10		44.699	2.245	10.779	12.437	0.142	13.321	11.396	2.243	0.49	0.47	98.222		6.52906	0.246639	1.8555	0	0.0542745	0	0.0175663	1.51905	0	2.90078	1.78331	0	0.635171	0.0912973	0	0	0	0	0	15.6326	6.46793	1.53207	0	8	0.306058	0.244329	0	0.0537663	0.42666	0	2.87362	1.07817	0.0174018
BR GIC 9b	px amp gabbro	upper gabbro	9b2 13		44.375	2.39	10.834	12.521	0.151	13.289	11.668	2.213	0.471	0.23	98.142		6.49563	0.263131	1.86897	0	0.0266168	0	0.0187197	1.53259	0	2.90001	1.82979	0	0.628019	0.0879454	0	0	0	0	0	15.6514	6.44326	1.55674	0	8	0.297157	0.26101	0	0.0264022	0.367907	0	2.87663	1.15232	0.0185688
H11	diorite	meladiorite	B H11A2_1		47.5551	1.7772	6.75802	16.5899	0.268	12.4221	11.229	1.3001	0.6543	0.0311	99.131		7.00716	0.196958	1.17353	0	0.00362285	0	0.033444	2.04405	0	2.72876	1.77259	0	0.37139	0.122979	0	0	0	0	0	15.4545	6.90752	1.09248	0	8	0.0643632	0.194157	0	0.00357133	0.644826	0	2.68995	1.37016	0.0329685
H11	diorite	meladiorite	B H11A2_2		47.3512	1.7867	6.90302	16.6338	0.2421	12.3952	10.9801	1.4023	0.6694	0.0156	98.5282		6.9923	0.198441	1.20132	0	0.0018212	0	0.0302777	2.05392	0	2.72877	1.73707	0	0.401456	0.126091	0	0	0	0	0	15.4715	6.88278	1.11722	0	8	0.0652856	0.195333	0	0.00179268	0.709178	0	2.68603	1.31257	0.0298035
H11	diorite	meladiorite	B H11A2_3		47.7737	1.6538	6.88954	16.0286	0.2516	12.5216	11.6691	0.8256	0.6681	0.0113	98.3668		7.03279	0.183111	1.19525	0	0.00131511	0	0.0313681	1.97305	0	2.74804	1.84034	0	0.235623	0.125455	0	0	0	0	0	15.3664	6.94469	1.05531	0	8	0.124963	0.180817	0	0.00129863	0.569075	0	2.71362	1.37926	0.0309751
H11	diorite	meladiorite	B H11A2_4		47.136	1.9096	6.98052	17.1532	0.2618	12.4195	10.9761	1.1864	0.7012	0.0233	98.8917		6.95184	0.211827	1.21329	0	0.00271674	0	0.0327006	2.11541	0	2.73071	1.73427	0	0.339224	0.131916	0	0	0	0	0	15.4639	6.8163	1.1837	0	8	0.00593506	0.207697	0	0.00266377	0.879353	0	2.67747	1.19482	0.032063
H11	diorite	meladiorite	B H11A2_5		47.4606	1.801	7.03781	16.6048	0.2856	12.3813	11.1041	1.4687	0.6664	0.0639	99.1417		6.97607	0.199105	1.21912	0	0.00742546	0	0.0355529	2.04087	0	2.71312	1.74857	0	0.418523	0.124946	0	0	0	0	0	15.4833	6.87493	1.12507	0	8	0.0763681	0.196219	0	0.0073178	0.657256	0	2.67378	1.35402	0.0350374
H11	diorite	meladiorite	B H11A2_6		47.0738	1.8517	7.02525	16.6884	0.2692	12.2917	11.1415	1.4398	0.6609	0.0353	98.5999		6.95577	0.205792	1.22337	0	0.00412369	0	0.0336884	2.06198	0	2.70772	1.76373	0	0.412455	0.124569	0	0	0	0	0	15.4932	6.85431	1.14569	0	8	0.0598328	0.20279	0	0.00406353	0.661235	0	2.66822	1.37066	0.0331969
H11	diorite	meladiorite	B H11A2_7		47.4044	1.7748	6.83318	16.7247	0.2724	12.0188	11.2918	1.1181	0.6668	0.0275	98.5197		7.01924	0.197657	1.19241	0	0.00321921	0	0.03416	2.07078	0	2.65312	1.79125	0	0.320967	0.125944	0	0	0	0	0	15.4087	6.92833	1.07167	0	8	0.105292	0.195097	0	0.00317751	0.588065	0	2.61876	1.45589	0.0337175
H11	diorite	meladiorite	B H11A3_1		48.4685	1.7362	6.5492	16.6651	0.3386	12.1983	11.1618	1.3244	0.5699	0.0498	99.1695		7.09155	0.191062	1.12928	0	0.00576044	0	0.0419573	2.03889	0	2.66076	1.7496	0	0.375672	0.106363	0	0	0	0	0	15.3909	7.00573	0.99427	0	8	0.121339	0.188749	0	0.00569073	0.549958	0	2.62856	1.46425	0.0414495
H11	diorite	meladiorite	B H11A3_2		47.9268	1.852	6.92242	16.7017	0.2472	12.5541	11.1439	1.4398	0.6533	0.1187	99.7788		6.99176	0.203208	1.19013	0	0.01369	0	0.0305418	2.03738	0	2.73035	1.74167	0	0.40721	0.121571	0	0	0	0	0	15.4675	6.88736	1.11264	0	8	0.0597186	0.200174	0	0.0134856	0.676616	0	2.68958	1.33034	0.0300858
H11	diorite	meladiorite	B H11A3_3		48.2896	1.6933	6.71176	15.9389	0.2234	13.0776	11.0456	1.3777	0.6014	0.0939	99.191		7.04428	0.185784	1.15385	0	0.0108291	0	0.0275998	1.94422	0	2.84404	1.72621	0	0.389625	0.111907	0	0	0	0	0	15.4384	6.93198	1.06802	0	8	0.0674376	0.182822	0	0.0106565	0.721666	0	2.7987	1.19156	0.0271597
H11	diorite	meladiorite	B H11A3_4		48.0219	1.893	6.64968	16.2626	0.2563	12.457	11.1504	1.4951	0.6382	0.1127	99.0651		7.03645	0.208621	1.14827	0	0.0130552	0	0.0318055	1.99254	0	2.72115	1.75036	0	0.424711	0.119284	0	0	0	0	0	15.4463	6.95518	1.04482	0	8	0.0901943	0.206211	0	0.0129044	0.525166	0	2.68972	1.44436	0.0314381
H11	diorite	meladiorite	B H11A3_5		48.3263	1.6518	6.90792	16.5174	0.2246	12.3232	11.2543	1.186	0.6269	0.0971	99.2429		7.05968	0.181489	1.18927	0	0.0112141	0	0.0277876	2.01765	0	2.6838	1.76134	0	0.335888	0.116818	0	0	0	0	0	15.3849	6.96808	1.03192	0	8	0.141919	0.179134	0	0.0110686	0.589119	0	2.64898	1.40235	0.027427
H11	diorite	meladiorite	B H11A3_6		51.8065	0.8331	4.31875	15.2772	0.2627	14.1417	11.7101	0.7789	0.4006	0	99.582		7.44084	0.0899968	0.731015	0	0	0	0.0319548	1.83478	0	3.02806	1.80186	0	0.216884	0.0733936	0	0	0	0	0	15.2488	7.35225	0.647753	0	8	0.0745582	0.0889252	0	0	0.541195	0	2.99201	1.27174	0.0315744
H11	diorite	meladiorite	B H11A1_1		48.7974	1.4124	5.70361	16.1822	0.2875	13.1801	11.2119	1.087	0.4865	0.0335	98.7514		7.16504	0.155981	0.986964	0	0.00388876	0	0.0357518	1.98684	0	2.88513	1.76369	0	0.309428	0.09112	0	0	0	0	0	15.3838	7.04602	0.953981	0	8	0.0165884	0.15339	0	0.00382417	0.75141	0	2.8372	1.20242	0.035158
H11	diorite	meladiorite	B H11A1_2		47.7308	1.666	6.35488	16.4035	0.3287	12.6753	11.0516	1.3015	0.5888	0.0103	98.2175		7.05614	0.18524	1.10715	0	0.00120379	0	0.0411535	2.02772	0	2.79352	1.75031	0	0.37301	0.111031	0	0	0	0	0	15.4465	6.94285	1.05715	0	8	0.0322239	0.182266	0	0.00118446	0.726661	0	2.74867	1.2685	0.0404928
H11	diorite	meladiorite	B H11A1_3		47.5325	1.8396	7.10245	16.6096	0.2767	12.2173	11.4613	1.2386	0.6599	0.0817	99.1068		6.97573	0.203055	1.22839	0	0.00947907	0	0.0343912	2.03827	0	2.673	1.802	0	0.352402	0.123534	0	0	0	0	0	15.4402	6.88971	1.11029	0	8	0.10295	0.200551	0	0.00936218	0.560263	0	2.64004	1.45287	0.0339671
H11	diorite	meladiorite	B H11A1_4		47.3779	1.941	7.08979	16.3611	0.2984	12.3823	11.0271	1.184	0.6479	0.0542	98.4595		6.98338	0.215183	1.23155	0	0.00631588	0	0.0372501	2.01653	0	2.72092	1.7413	0	0.338337	0.121817	0	0	0	0	0	15.4126	6.87177	1.12823	0	8	0.0836438	0.211744	0	0.00621494	0.723394	0	2.67744	1.26091	0.0366548
H11	diorite	meladiorite	B H11A1_5		47.3518	1.8543	7.01514	16.9019	0.2801	12.1576	11.1259	1.3325	0.655	0.0644	98.824		6.97713	0.2055	1.21817	0	0.0075019	0	0.0349536	2.08247	0	2.67063	1.7563	0	0.380642	0.123109	0	0	0	0	0	15.4564	6.87332	1.12668	0	8	0.0733584	0.202443	0	0.00739028	0.674284	0	2.63089	1.3772	0.0344335
H11	diorite	meladiorite	B H11A1_6		48.1135	1.6686	6.69604	16.3504	0.2514	12.3299	11.1742	1.3963	0.6016	0.0439	99.1906		7.06644	0.184322	1.15899	0	0.00509733	0	0.0312707	2.00801	0	2.69971	1.75821	0	0.397576	0.112707	0	0	0	0	0	15.4223	6.98379	1.01621	0	8	0.12923	0.182166	0	0.00503772	0.531701	0	2.66814	1.45282	0.030905
H11	diorite	meladiorite	B H11A1_7		49.6248	1.3732	5.69921	15.8091	0.2652	12.8534	11.4457	1.0454	0.4841	0	98.9796		7.2431	0.150748	0.980327	0	0	0	0.0327822	1.92946	0	2.79685	1.78974	0	0.295813	0.0901301	0	0	0	0	0	15.309	7.1696	0.830396	0	8	0.139983	0.149218	0	0	0.462054	0	2.76847	1.44783	0.0324495
07-4	altered	mingled zone - felsic	B 074A4_1		44.5557	1.6059	7.19496	25.4807	0.573	6.2062	10.3267	1.8587	0.9512	0	99.5729		6.88874	0.186744	1.31098	0	0	0	0.0750291	3.29421	0	1.4305	1.71049	0	0.557127	0.187593	0	0	0	0	0	15.6414	6.79147	1.20853	0	8	0.0839327	0.184107	0	0	0.64034	0	1.4103	2.60735	0.0739697
07-4	altered	mingled zone - felsic	B 074A4_2		44.3116	1.7606	7.4531	25.1804	0.5321	6.2338	10.6509	1.8374	0.9854	0.0134	99.4814		6.83626	0.204293	1.35509	0	0.00163437	0	0.0695238	3.24838	0	1.43377	1.76039	0	0.549558	0.19392	0	0	0	0	0	15.6528	6.75882	1.24118	0	8	0.0985595	0.201979	0	0.00161586	0.515188	0	1.41753	2.69639	0.0687362
07-4	altered	mingled zone - felsic	B 074A4_3		44.6914	1.7397	7.21273	25.885	0.5652	6.1046	10.2792	1.8533	0.9725	0.0108	99.7289		6.87946	0.201417	1.30846	0	0.00131431	0	0.0736836	3.33182	0	1.40092	1.69516	0	0.553075	0.190954	0	0	0	0	0	15.6363	6.77673	1.22327	0	8	0.0656482	0.198409	0	0.00129469	0.676634	0	1.38	2.60543	0.0725834
07-4	altered	mingled zone - felsic	B 074A4_4		44.9478	1.5927	7.03985	25.5658	0.5426	6.141	10.3683	1.7269	0.9509	0.01	99.1999		6.93226	0.184753	1.27956	0	0.0012193	0	0.0708737	3.29708	0	1.41199	1.71315	0	0.516348	0.187073	0	0	0	0	0	15.5943	6.83877	1.16123	0	8	0.101066	0.182262	0	0.00120286	0.612048	0	1.39294	2.64056	0.0699178
07-4	altered	mingled zone - felsic	B 074A4_5		44.5713	2.32	6.88148	25.0784	0.5801	6.7091	9.969	2.0621	0.9233	0.0351	99.7027		6.8539	0.268326	1.24708	0	0.00426712	0	0.0755482	3.22467	0	1.53805	1.64231	0	0.614753	0.181107	0	0	0	0	0	15.65	6.744	1.22708	0.028916	8	0	0.235107	0	0.0041987	0.725785	0	1.51339	2.44718	0.0743368
07-4	altered	mingled zone - felsic	B 074A4_6		44.532	1.7587	7.23662	25.6176	0.5395	6.0336	10.2592	1.8445	0.9974	0.0092	99.4589		6.88326	0.204459	1.31822	0	0.00112423	0	0.070624	3.31103	0	1.39035	1.69886	0	0.552725	0.196653	0	0	0	0	0	15.6273	6.78973	1.21027	0	8	0.0900442	0.201681	0	0.00110895	0.61651	0	1.37146	2.64953	0.0696644
07-4	altered	mingled zone - felsic	B 074A4_7		44.5401	1.5604	7.19557	26.8168	0.5153	5.672	10.3459	1.7815	0.955	0.0192	100.339		6.87965	0.181277	1.30982	0	0.00234456	0	0.0674084	3.46358	0	1.3061	1.71201	0	0.533469	0.18816	0	0	0	0	0	15.6438	6.77019	1.22981	0	8	0.0591708	0.178393	0	0.00230726	0.720215	0	1.28532	2.68826	0.0663359
07-4	altered	mingled zone - felsic	B 074A1_1		43.9568	1.38	7.56992	27.1516	0.3891	5.1445	10.9987	1.5113	0.9948	0	99.4745		6.83312	0.161348	1.3868	0	0	0	0.0512263	3.52933	0	1.19223	1.83171	0	0.455462	0.19726	0	0	0	0	0	15.6385	6.75309	1.24691	0	8	0.123654	0.159459	0	0	0.532435	0	1.17827	2.95556	0.0506264
07-4	altered	mingled zone - felsic	B 074A1_3		44.0888	1.5546	7.42727	27.0761	0.4061	5.2848	10.6816	1.1811	1.4378	0.0059	99.541		6.85065	0.181683	1.36007	0	0.00072477	0	0.0534411	3.51797	0	1.22421	1.77812	0	0.355794	0.284978	0	0	0	0	0	15.6077	6.7526	1.2474	0	8	0.0932103	0.179083	0	0.000714397	0.648938	0	1.20669	2.81869	0.0526762
07-4	altered	mingled zone - felsic	B 074A1_4		43.7724	1.7483	7.35763	27.2819	0.4431	5.081	10.4005	1.7469	0.9759	0	99.2908		6.83006	0.205179	1.35298	0	0	0	0.0585551	3.55961	0	1.18195	1.7386	0	0.528446	0.19424	0	0	0	0	0	15.6496	6.73253	1.26747	0	8	0.0661882	0.202249	0	0	0.647491	0	1.16507	2.86128	0.0577189
07-4	altered	mingled zone - felsic	B 074A1_5		40.4342	0.4341	10.1633	27.4897	0.3788	4.4378	11.1908	1.507	1.7814	0.0033	98.7338		6.45821	0.0521489	1.91305	0	0.000416699	0	0.0512403	3.67144	0	1.05671	1.9149	0	0.466643	0.362939	0	0	0	0	0	15.9477	6.35881	1.64119	0	8	0.242416	0.0513462	0	0.000410285	0.697108	0	1.04045	2.91782	0.0504517
07-4	altered	mingled zone - felsic	B 074A1_6		44.1453	1.7164	7.12593	26.2385	0.4521	5.5576	10.5312	1.6416	0.9935	0.0008	99.2698		6.87966	0.201184	1.30874	0	9.85637e-05	0	0.0596699	3.4192	0	1.2912	1.75826	0	0.495973	0.197496	0	0	0	0	0	15.6115	6.79614	1.20386	0	8	0.0889955	0.198741	0	9.73672e-05	0.551631	0	1.27553	2.82606	0.0589456
07-4	altered	mingled zone - felsic	B 074A1_7		44.256	1.7201	7.29493	25.9764	0.4794	5.9719	10.186	1.8726	0.9745	0.0151	99.2979		6.85943	0.200522	1.3325	0	0.00185028	0	0.0629293	3.36665	0	1.37992	1.69138	0	0.56269	0.192667	0	0	0	0	0	15.6505	6.75356	1.24644	0	8	0.0654882	0.197427	0	0.00182172	0.699074	0	1.35862	2.61561	0.061958
07-4	altered	mingled zone - felsic	B 074A1_8		44.7828	1.2737	6.85094	24.6826	0.3962	6.8966	10.8727	1.4762	0.8741	0	98.8755		6.93674	0.148389	1.25062	0	0	0	0.0519753	3.19697	0	1.59259	1.80428	0	0.4433	0.172709	0	0	0	0	0	15.5976	6.84342	1.15658	0	8	0.0772092	0.146393	0	0	0.610532	0	1.57116	2.54342	0.0512761
07-4	altered	mingled zone - felsic	B 074A3_1		43.4357	1.2479	7.87973	26.0771	0.3888	5.7782	10.9499	1.5174	0.9921	0.047	98.6108		6.78143	0.146537	1.44983	0	0.00580119	0	0.0514091	3.40437	0	1.34491	1.8315	0	0.459286	0.197578	0	0	0	0	0	15.6726	6.68664	1.31336	0	8	0.116206	0.144488	0	0.00572011	0.633985	0	1.32611	2.7228	0.0506905
07-4	altered	mingled zone - felsic	B 074A3_2		43.4198	1.2472	7.74565	26.4779	0.4352	5.7564	10.9676	1.4265	1.0329	0	98.9008		6.78018	0.146481	1.42542	0	0	0	0.0575548	3.45733	0	1.34008	1.83479	0	0.431851	0.205741	0	0	0	0	0	15.6794	6.67389	1.32611	0	8	0.0769664	0.144185	0	0	0.709807	0	1.31907	2.69332	0.0566525
07-4	altered	mingled zone - felsic	B 074A3_3		43.2125	1.7216	7.72656	26.7372	0.4242	5.4925	10.5495	1.7095	1.0279	0	99.1194		6.75228	0.202332	1.42284	0	0	0	0.0561372	3.49349	0	1.27949	1.76602	0	0.517867	0.204881	0	0	0	0	0	15.6953	6.64666	1.35334	0	8	0.0472497	0.199167	0	0	0.70827	0	1.25947	2.73058	0.0552591
07-4	altered	mingled zone - felsic	B 074A3_4		43.4492	1.6891	7.62057	25.5989	0.4745	6.1064	10.2794	1.8373	1.078	0	98.4264		6.78421	0.198365	1.40228	0	0	0	0.062747	3.34228	0	1.42144	1.71952	0	0.556168	0.214707	0	0	0	0	0	15.7017	6.6757	1.3243	0	8	0.055549	0.195192	0	0	0.724022	0	1.3987	2.56479	0.0617433
07-4	altered	mingled zone - felsic	B 074A3_5		44.1243	1.7611	6.9985	25.3407	0.4991	6.6172	10.28	1.9446	0.9551	0	98.8834		6.84541	0.205493	1.27955	0	0	0	0.0655764	3.28733	0	1.53045	1.70858	0	0.584871	0.189008	0	0	0	0	0	15.6963	6.73464	1.25884	0.00651292	8	0	0.195655	0	0	0.732256	0	1.50569	2.50188	0.0645154
07-4	altered	mingled zone - felsic	B 074A3_6		44.1738	1.7609	7.02157	25.8855	0.5561	6.2696	10.227	2.0102	0.9996	0	99.8083		6.84568	0.205248	1.28238	0	0	0	0.0729867	3.35438	0	1.44849	1.69794	0	0.603948	0.1976	0	0	0	0	0	15.7087	6.73728	1.26207	0.000645291	8	0	0.201352	0	0	0.716873	0	1.42556	2.58439	0.0718309
07-4	altered	mingled zone - felsic	B 074A3_7		44.3797	1.784	7.27328	25.5492	0.5352	6.5351	10.2854	1.8399	0.927	0	99.8326		6.8389	0.206771	1.32088	0	0	0	0.0698485	3.29217	0	1.50134	1.69803	0	0.549673	0.182218	0	0	0	0	0	15.6598	6.72006	1.27994	0	8	0.0179781	0.203177	0	0	0.785507	0	1.47525	2.44945	0.0686346
07-4	altered	mingled zone - felsic	B 074A3_8		43.8217	1.6757	7.58299	25.7163	0.451	6.1591	10.6345	1.8478	0.9645	0	99.6976		6.79013	0.195289	1.38471	0	0	0	0.059184	3.33196	0	1.42276	1.76534	0	0.555076	0.190634	0	0	0	0	0	15.6951	6.69535	1.30465	0	8	0.060728	0.192563	0	0	0.633147	0	1.4029	2.65231	0.0583578
07-4	altered	mingled zone - felsic	B 074A1_1		43.9568	1.38	7.56992	27.1516	0.3891	5.1445	10.9987	1.5113	0.9948	0	99.4745		6.83312	0.161348	1.3868	0	0	0	0.0512263	3.52933	0	1.19223	1.83171	0	0.455462	0.19726	0	0	0	0	0	15.6385	6.75309	1.24691	0	8	0.123654	0.159459	0	0	0.532435	0	1.17827	2.95556	0.0506264
07-4	altered	mingled zone - felsic	B 074A1_3		44.0888	1.5546	7.42727	27.0761	0.4061	5.2848	10.6816	1.1811	1.4378	0.0059	99.541		6.85065	0.181683	1.36007	0	0.00072477	0	0.0534411	3.51797	0	1.22421	1.77812	0	0.355794	0.284978	0	0	0	0	0	15.6077	6.7526	1.2474	0	8	0.0932103	0.179083	0	0.000714397	0.648938	0	1.20669	2.81869	0.0526762
07-4	altered	mingled zone - felsic	B 074A1_4		43.7724	1.7483	7.35763	27.2819	0.4431	5.081	10.4005	1.7469	0.9759	0	99.2908		6.83006	0.205179	1.35298	0	0	0	0.0585551	3.55961	0	1.18195	1.7386	0	0.528446	0.19424	0	0	0	0	0	15.6496	6.73253	1.26747	0	8	0.0661882	0.202249	0	0	0.647491	0	1.16507	2.86128	0.0577189
07-4	altered	mingled zone - felsic	B 074A1_5		40.4342	0.4341	10.1633	27.4897	0.3788	4.4378	11.1908	1.507	1.7814	0.0033	98.7338		6.45821	0.0521489	1.91305	0	0.000416699	0	0.0512403	3.67144	0	1.05671	1.9149	0	0.466643	0.362939	0	0	0	0	0	15.9477	6.35881	1.64119	0	8	0.242416	0.0513462	0	0.000410285	0.697108	0	1.04045	2.91782	0.0504517
07-4	altered	mingled zone - felsic	B 074A1_6		44.1453	1.7164	7.12593	26.2385	0.4521	5.5576	10.5312	1.6416	0.9935	0.0008	99.2698		6.87966	0.201184	1.30874	0	9.85637e-05	0	0.0596699	3.4192	0	1.2912	1.75826	0	0.495973	0.197496	0	0	0	0	0	15.6115	6.79614	1.20386	0	8	0.0889955	0.198741	0	9.73672e-05	0.551631	0	1.27553	2.82606	0.0589456
07-4	altered	mingled zone - felsic	B 074A1_7		44.256	1.7201	7.29493	25.9764	0.4794	5.9719	10.186	1.8726	0.9745	0.0151	99.2979		6.85943	0.200522	1.3325	0	0.00185028	0	0.0629293	3.36665	0	1.37992	1.69138	0	0.56269	0.192667	0	0	0	0	0	15.6505	6.75356	1.24644	0	8	0.0654882	0.197427	0	0.00182172	0.699074	0	1.35862	2.61561	0.061958
07-4	altered	mingled zone - felsic	B 074A1_8		44.7828	1.2737	6.85094	24.6826	0.3962	6.8966	10.8727	1.4762	0.8741	0	98.8755		6.93674	0.148389	1.25062	0	0	0	0.0519753	3.19697	0	1.59259	1.80428	0	0.4433	0.172709	0	0	0	0	0	15.5976	6.84342	1.15658	0	8	0.0772092	0.146393	0	0	0.610532	0	1.57116	2.54342	0.0512761
07-4	altered	mingled zone - felsic	B 074A3_1		43.4357	1.2479	7.87973	26.0771	0.3888	5.7782	10.9499	1.5174	0.9921	0.047	98.6108		6.78143	0.146537	1.44983	0	0.00580119	0	0.0514091	3.40437	0	1.34491	1.8315	0	0.459286	0.197578	0	0	0	0	0	15.6726	6.68664	1.31336	0	8	0.116206	0.144488	0	0.00572011	0.633985	0	1.32611	2.7228	0.0506905
07-4	altered	mingled zone - felsic	B 074A3_2		43.4198	1.2472	7.74565	26.4779	0.4352	5.7564	10.9676	1.4265	1.0329	0	98.9008		6.78018	0.146481	1.42542	0	0	0	0.0575548	3.45733	0	1.34008	1.83479	0	0.431851	0.205741	0	0	0	0	0	15.6794	6.67389	1.32611	0	8	0.0769664	0.144185	0	0	0.709807	0	1.31907	2.69332	0.0566525
07-4	altered	mingled zone - felsic	B 074A3_3		43.2125	1.7216	7.72656	26.7372	0.4242	5.4925	10.5495	1.7095	1.0279	0	99.1194		6.75228	0.202332	1.42284	0	0	0	0.0561372	3.49349	0	1.27949	1.76602	0	0.517867	0.204881	0	0	0	0	0	15.6953	6.64666	1.35334	0	8	0.0472497	0.199167	0	0	0.70827	0	1.25947	2.73058	0.0552591
07-4	altered	mingled zone - felsic	B 074A3_4		43.4492	1.6891	7.62057	25.5989	0.4745	6.1064	10.2794	1.8373	1.078	0	98.4264		6.78421	0.198365	1.40228	0	0	0	0.062747	3.34228	0	1.42144	1.71952	0	0.556168	0.214707	0	0	0	0	0	15.7017	6.6757	1.3243	0	8	0.055549	0.195192	0	0	0.724022	0	1.3987	2.56479	0.0617433
07-4	altered	mingled zone - felsic	B 074A3_5		44.1243	1.7611	6.9985	25.3407	0.4991	6.6172	10.28	1.9446	0.9551	0	98.8834		6.84541	0.205493	1.27955	0	0	0	0.0655764	3.28733	0	1.53045	1.70858	0	0.584871	0.189008	0	0	0	0	0	15.6963	6.73464	1.25884	0.00651292	8	0	0.195655	0	0	0.732256	0	1.50569	2.50188	0.0645154
07-4	altered	mingled zone - felsic	B 074A3_6		44.1738	1.7609	7.02157	25.8855	0.5561	6.2696	10.227	2.0102	0.9996	0	99.8083		6.84568	0.205248	1.28238	0	0	0	0.0729867	3.35438	0	1.44849	1.69794	0	0.603948	0.1976	0	0	0	0	0	15.7087	6.73728	1.26207	0.000645291	8	0	0.201352	0	0	0.716873	0	1.42556	2.58439	0.0718309
07-4	altered	mingled zone - felsic	B 074A3_7		44.3797	1.784	7.27328	25.5492	0.5352	6.5351	10.2854	1.8399	0.927	0	99.8326		6.8389	0.206771	1.32088	0	0	0	0.0698485	3.29217	0	1.50134	1.69803	0	0.549673	0.182218	0	0	0	0	0	15.6598	6.72006	1.27994	0	8	0.0179781	0.203177	0	0	0.785507	0	1.47525	2.44945	0.0686346
07-4	altered	mingled zone - felsic	B 074A3_8		43.8217	1.6757	7.58299	25.7163	0.451	6.1591	10.6345	1.8478	0.9645	0	99.6976		6.79013	0.195289	1.38471	0	0	0	0.059184	3.33196	0	1.42276	1.76534	0	0.555076	0.190634	0	0	0	0	0	15.6951	6.69535	1.30465	0	8	0.060728	0.192563	0	0	0.633147	0	1.4029	2.65231	0.0583578
AGF12	enclave	mingled zone - mafic	B AGF12A5_1		47.8501	0.998	5.65407	18.8553	0.4471	11.2676	11.4246	1.1331	0.5283	0.1946	1.14099e+06		7.14435	0.112073	0.994882	0	0.0229703	0	0.0565358	2.35405	0	2.50805	1.82744	0	0.327987	0.100617	0	0	0	0	0	15.449	7.03988	0.960117	0	8	0.0202171	0.110435	0	0.0226345	0.662791	0	2.47138	1.65684	0.0557091
AGF12	enclave	mingled zone - mafic	B AGF12A5_2		49.1123	0.7264	4.65399	17.4513	0.4061	12.1118	11.7301	0.843	0.3995	0.4382	1.13542e+06		7.30197	0.0812301	0.815464	0	0.0515071	0	0.0511353	2.1696	0	2.68462	1.86841	0	0.242988	0.0757662	0	0	0	0	0	15.3427	7.21564	0.78436	0	8	0.0214629	0.0802698	0	0.0508981	0.537394	0	2.65288	1.60656	0.0505308
AGF12	enclave	mingled zone - mafic	B AGF12A5_3		47.7978	0.9215	5.72133	18.9606	0.4558	11.4653	11.3146	1.1258	0.5461	0.1684	1.14243e+06		7.12984	0.103385	1.00577	0	0.0198591	0	0.0575818	2.36498	0	2.54966	1.80814	0	0.325568	0.103909	0	0	0	0	0	15.4687	7.00532	0.988205	0.00647392	8	0	0.0951059	0	0.0195122	0.789343	0	2.50513	1.53433	0.0565761
AGF12	enclave	mingled zone - mafic	B AGF12A5_4		48.4469	0.7134	5.74992	18.6029	0.36	11.5282	11.7914	1.0067	0.5688	0.6077	1.15286e+06		7.14877	0.0791754	0.999902	0	0.0708924	0	0.044989	2.29536	0	2.53602	1.86403	0	0.287988	0.107062	0	0	0	0	0	15.4342	7.05376	0.946238	0	8	0.0403746	0.0781232	0	0.0699502	0.603231	0	2.50231	1.66162	0.0443911
AGF12	enclave	mingled zone - mafic	B AGF12A5_5		49.9712	0.724	3.85186	17.3448	0.4329	12.9957	11.5583	0.8577	0.379	0.1429	1.13989e+06		7.38126	0.0804343	0.670519	0	0.0166874	0	0.0541548	2.14231	0	2.86177	1.82905	0	0.245615	0.07141	0	0	0	0	0	15.3532	7.26549	0.660003	0.0745031	8	0	0.00466968	0	0.0164256	0.710134	0	2.81689	1.39857	0.0533055
AGF12	enclave	mingled zone - mafic	B AGF12A5_6		49.2953	0.7695	4.22629	17.7809	0.4097	12.5192	11.6955	0.8941	0.3982	0.1656	1.13869e+06		7.31739	0.0859115	0.739333	0	0.0194337	0	0.0515057	2.20702	0	2.77046	1.85991	0	0.257303	0.0753982	0	0	0	0	0	15.3837	7.21141	0.728624	0.0599691	8	0	0.024698	0	0.0191522	0.656605	0	2.73033	1.51845	0.0507597
AGF12	enclave	mingled zone - mafic	B AGF12A5_7		49.3795	0.8488	4.36717	17.2367	0.4098	12.6009	11.538	0.9092	0.4035	0.2404	1.13613e+06		7.3232	0.0946785	0.763281	0	0.028186	0	0.0514713	2.13752	0	2.786	1.83319	0	0.26141	0.076332	0	0	0	0	0	15.3553	7.22081	0.75261	0.0265797	8	0	0.0667751	0	0.0277919	0.634144	0	2.74704	1.47349	0.0507516
AGF12	enclave	mingled zone - mafic	B AGF12A5_8		49.0353	0.9229	4.46806	17.5651	0.3979	12.4887	11.5325	0.8743	0.3943	0.0531	1.13379e+06		7.29893	0.103323	0.783789	0	0.0062487	0	0.0501606	2.18627	0	2.77136	1.83906	0	0.252301	0.0748663	0	0	0	0	0	15.3663	7.1883	0.771909	0.0397944	8	0	0.0619625	0	0.00615399	0.686685	0	2.72935	1.46645	0.0494003
AGF12	enclave	mingled zone - felsic	B AGF12A6_1		47.8206	1.3598	5.41076	19.5647	0.4888	10.791	11.0496	1.1146	0.5693	0	1.13886e+06		7.17026	0.153351	0.956111	0	0	0	0.0620711	2.45299	0	2.41216	1.77496	0	0.324001	0.108885	0	0	0	0	0	15.4148	7.05791	0.94113	0.000964785	8	0	0.149983	0	0	0.709472	0	2.37436	1.70508	0.0610985
AGF12	enclave	mingled zone - felsic	B AGF12A6_2		47.6726	1.3599	5.7129	19.146	0.4692	11.2508	10.9899	1.4386	0.6256	0	1.14462e+06		7.10899	0.152524	1.00398	0	0	0	0.0592565	2.38737	0	2.50119	1.75572	0	0.415899	0.118999	0	0	0	0	0	15.5039	6.99422	0.987773	0.0180064	8	0	0.132055	0	0	0.730664	0	2.46081	1.61817	0.0582998
AGF12	enclave	mingled zone - felsic	B AGF12A6_3		48.402	1.2114	5.4775	19.4827	0.4465	10.8433	11.2082	1.0632	0.5851	0	1.14525e+06		7.2029	0.135589	0.960632	0	0	0	0.0562735	2.42435	0	2.40564	1.78691	0	0.306738	0.111067	0	0	0	0	0	15.3901	7.10163	0.898373	0	8	0.0487526	0.133682	0	0	0.637666	0	2.37182	1.7526	0.0554823
AGF12	enclave	mingled zone - felsic	B AGF12A6_4		47.1696	1.4727	5.9992	20.0081	0.4281	10.5644	11.0618	1.4424	0.662	0.0087	1.14638e+06		7.0593	0.16577	1.05809	0	0.00102935	0	0.0542605	2.50385	0	2.35705	1.77357	0	0.418498	0.126377	0	0	0	0	0	15.5178	6.95268	1.04211	0.00521027	8	0	0.158056	0	0.0010138	0.684287	0	2.32145	1.78175	0.0534409
AGF12	enclave	mingled zone - felsic	B AGF12A6_5		47.3253	1.2259	6.10738	20.3221	0.4475	10.522	11.048	1.2191	0.6763	0.0063	1.14734e+06		7.07698	0.13788	1.07632	0	0.000744801	0	0.0566743	2.54112	0	2.34573	1.76995	0	0.353429	0.129004	0	0	0	0	0	15.4878	6.95109	1.04891	0	8	0.00825499	0.135427	0	0.000731551	0.803743	0	2.304	1.69218	0.0556661
AGF12	enclave	mingled zone - felsic	B AGF12A6_6		48.4212	1.019	5.47699	19.3999	0.381	10.8398	11.3326	0.9922	0.5741	0.049	1.14253e+06		7.2182	0.114251	0.962199	0	0.00577476	0	0.0481013	2.41821	0	2.40901	1.80986	0	0.286748	0.109167	0	0	0	0	0	15.3815	7.12191	0.878087	0	8	0.0712775	0.112727	0	0.00569773	0.605407	0	2.37688	1.78055	0.0474597
AGF12	enclave	mingled zone - felsic	B AGF12A6_7		47.3752	1.1259	6.01616	20.024	0.4342	10.2974	11.364	1.2222	0.6424	0	1.14272e+06		7.1073	0.127041	1.06366	0	0	0	0.0551674	2.51193	0	2.30307	1.82645	0	0.355471	0.122933	0	0	0	0	0	15.473	7.01654	0.983465	0	8	0.0666126	0.125419	0	0	0.579976	0	2.27365	1.89988	0.0544628
AGF12	enclave	mingled zone - felsic	B AGF12A6_8		47.8956	1.1602	5.51627	20.0282	0.4867	10.5948	10.9148	1.1505	0.5405	0.0458	1.14077e+06		7.17888	0.130793	0.9744	0	0.00542715	0	0.0617819	2.51019	0	2.36744	1.75267	0	0.334315	0.103339	0	0	0	0	0	15.4192	7.05466	0.94534	0	8	0.012199	0.12853	0	0.00533324	0.782217	0	2.32647	1.68453	0.0607128
AGF12	enclave	mingled zone - felsic	B AGF12A6_9		48.5715	0.8854	4.92846	19.3236	0.4928	10.8619	11.2201	1.0799	0.4605	0	1.13486e+06		7.28652	0.099901	0.871324	0	0	0	0.0626106	2.42398	0	2.42923	1.80326	0	0.314073	0.0881206	0	0	0	0	0	15.379	7.19052	0.809484	0	8	0.0503599	0.0985848	0	0	0.598082	0	2.39723	1.79396	0.0617857
GIC7C		mingled zone - mafic	B GIC7CA5_1		48.5029	1.2747	5.0454	18.8574	0.3561	11.4921	10.5098	0.9034	0.5172	0.0534	97.6644		7.26407	0.143586	0.890509	0	0.00632264	0	0.0451672	2.36155	0	2.56588	1.68628	0	0.262302	0.0988053	0	0	0	0	0	15.3245	7.11247	0.871924	0.0156038	8	0	0.124986	0	0.00619069	0.939987	0	2.51233	1.37228	0.0442246
GIC7C		mingled zone - mafic	B GIC7CA5_2		48.8129	1.3535	5.049	18.7468	0.4417	11.8566	10.5988	0.9172	0.502	0.0212	98.6582		7.24777	0.151154	0.883498	0	0.00248857	0	0.0555439	2.32756	0	2.62455	1.68597	0	0.264023	0.0950786	0	0	0	0	0	15.3376	7.08825	0.864052	0.0476959	8	0	0.100131	0	0.0024338	0.990159	0	2.56679	1.28617	0.0543214
GIC7C		mingled zone - mafic	B GIC7CA5_3		48.5845	1.2493	5.1897	19.2613	0.4347	11.3059	10.784	1.0132	0.5489	0.0399	99.0465		7.23338	0.139895	0.910575	0	0.00469636	0	0.0548115	2.39791	0	2.50942	1.72007	0	0.292447	0.104243	0	0	0	0	0	15.3674	7.09653	0.893348	0.010118	8	0	0.12713	0	0.00460751	0.853781	0	2.46195	1.49876	0.0537746
GIC7C		mingled zone - mafic	B GIC7CA5_4		49.7457	0.9566	4.3067	18.5676	0.4342	12.5969	10.3377	0.8298	0.439	0.0501	98.6674		7.36093	0.106463	0.75102	0	0.00586084	0	0.0544133	2.2974	0	2.77885	1.63879	0	0.238045	0.082861	0	0	0	0	0	15.3146	7.1653	0.73106	0.103634	7.99999	0	0	0	0.00570507	1.19004	0	2.705	1.0463	0.0529573
GIC7C		mingled zone - mafic	B GIC7CA5_5		49.7407	1.0317	4.5317	18.0756	0.3847	12.5806	10.5425	0.9569	0.4789	0	98.8403		7.34451	0.114577	0.788574	0	0	0	0.0481074	2.23176	0	2.76935	1.66769	0	0.273921	0.0901996	0	0	0	0	0	15.3287	7.18053	0.770968	0.0484981	8	0	0.0635206	0	0	1.00408	0	2.70752	1.17785	0.0470333
GIC7C		mingled zone - mafic	B GIC7CA5_6		49.1148	1.0208	4.6109	18.5314	0.3741	11.7883	10.6243	1.1596	0.4603	0.0595	98.0087		7.32709	0.114539	0.810653	0	0.00701748	0	0.0472657	2.3117	0	2.62177	1.69801	0	0.335379	0.087593	0	0	0	0	0	15.361	7.19425	0.795956	0.00978912	8	0	0.102673	0	0.00689025	0.818836	0	2.57424	1.45095	0.0464087
GIC7C		mingled zone - mafic	B GIC7CA5_7		49.0222	1.0513	4.7245	18.9332	0.3734	12.043	10.4515	1.1111	0.4486	0.0646	98.7724		7.28761	0.117547	0.82771	0	0.00759223	0	0.0470116	2.35353	0	2.66902	1.66453	0	0.320224	0.0850669	0	0	0	0	0	15.3798	7.11787	0.808431	0.0737037	8	0	0.0411052	0	0.0074154	1.04647	0	2.60685	1.25224	0.0459166
GIC7C		mingled zone - mafic	B GIC7CA5_8		48.8869	1.0795	4.6816	19.3236	0.4341	11.8655	10.28	1.0283	0.4528	0.0568	98.2653		7.28923	0.121061	0.822647	0	0.00669549	0	0.0548173	2.40924	0	2.63755	1.64212	0	0.297247	0.0861201	0	0	0	0	0	15.3667	7.10279	0.801606	0.0956063	8	0	0.0223581	0	0.00652424	1.14648	0	2.57008	1.20114	0.0534152
GIC7C		mingled zone - felsic	B GIC7CA1_1		50.3465	0.5031	4.2348	19.1421	0.362	11.3727	11.9431	0.6682	0.3361	0.0162	99.0839		7.42861	0.0558322	0.736379	0	0.00188972	0	0.0452361	2.36173	0	2.50165	1.88789	0	0.191141	0.063258	0	0	0	0	0	15.2736	7.35431	0.645687	0	8	0.0833273	0.0552738	0	0.00187082	0.455464	0	2.47663	1.88265	0.0447837
GIC7C		mingled zone - felsic	B GIC7CA1_2		50.7977	0.4987	4.0663	20.6438	0.2738	10.8248	11.8863	0.7339	0.3459	0.0138	100.234		7.44891	0.0550022	0.702713	0	0.00159983	0	0.0340033	2.53129	0	2.36643	1.86731	0	0.208638	0.0647006	0	0	0	0	0	15.2806	7.36958	0.630423	0	8	0.0648058	0.0544164	0	0.00158279	0.484704	0	2.34123	2.01962	0.0336411
GIC7C		mingled zone - felsic	B GIC7CA1_3		49.9894	0.4538	3.9975	20.474	0.2569	10.6097	11.7555	0.865	0.3647	0.0271	99.071		7.43794	0.0507845	0.70096	0	0.00318778	0	0.0323726	2.5473	0	2.35344	1.87386	0	0.249516	0.069218	0	0	0	0	0	15.3186	7.36655	0.633451	0	8	0.0607814	0.0502971	0	0.00315719	0.437252	0	2.33085	2.0856	0.0320619
GIC7C		mingled zone - felsic	B GIC7CA1_4		50.1534	0.4037	3.7816	20.292	0.2805	10.7163	11.4806	0.8412	0.3092	0	98.376		7.48594	0.0453207	0.665199	0	0	0	0.0354583	2.53264	0	2.3846	1.83583	0	0.243419	0.0588701	0	0	0	0	0	15.2873	7.40102	0.598979	0	8	0.0586739	0.0448066	0	0	0.515904	0	2.35755	1.98801	0.035056
GIC7C		mingled zone - felsic	B GIC7CA1_5		50.3005	0.4364	3.642	20.2336	0.2792	10.7068	11.7599	0.8998	0.3255	0.0161	98.937		7.48758	0.0488592	0.63891	0	0.0018947	0	0.0351985	2.51852	0	2.37604	1.8754	0	0.259671	0.0618058	0	0	0	0	0	15.3039	7.42645	0.573547	0	8	0.0601468	0.0484603	0	0.00187923	0.372495	0	2.35664	2.12547	0.0349111
GIC7C		mingled zone - felsic	B GIC7CA1_6		50.4757	0.685	3.3735	19.615	0.2371	10.8555	11.9072	0.7741	0.3514	0.0017	98.5928		7.51591	0.0767152	0.591984	0	0.000200121	0	0.0298999	2.44225	0	2.40976	1.89946	0	0.223462	0.0667436	0	0	0	0	0	15.2564	7.47753	0.522469	0	8	0.0664923	0.0763235	0	0.000199099	0.23368	0	2.39746	2.1961	0.0297472
GIC7C		mingled zone - felsic	B GIC7CA1_7		49.6572	0.6331	3.3327	19.7266	0.224	11.1092	11.801	0.7458	0.3233	0.0238	97.7087		7.46457	0.0715792	0.590404	0	0.00282842	0	0.0285174	2.47958	0	2.4896	1.90048	0	0.217347	0.0619922	0	0	0	0	0	15.3069	7.39231	0.584688	0.0230055	8	0	0.0478807	0	0.00280104	0.441016	0	2.4655	2.01456	0.0282413
GIC7C		mingled zone - felsic	B GIC7CA2_1		51.5513	0.4987	2.9091	17.6171	0.2408	12.6332	12.0745	0.5233	0.3039	0	98.6666		7.58102	0.0551594	0.50417	0	0	0	0.0299905	2.16634	0	2.76966	1.9023	0	0.149193	0.0570069	0	0	0	0	0	15.2148	7.51951	0.480486	0	8	0.0195936	0.0547119	0	0	0.37018	0	2.74719	1.77858	0.0297472
GIC7C		mingled zone - felsic	B GIC7CA2_2		51.149	0.4218	2.967	18.6463	0.2059	11.8872	11.8993	0.6486	0.3671	0.0154	98.3709		7.57546	0.0469862	0.517869	0	0.00180317	0	0.0258266	2.30923	0	2.62468	1.88806	0	0.186233	0.069353	0	0	0	0	0	15.2455	7.51657	0.483433	0	8	0.0304092	0.0466209	0	0.00178916	0.354855	0	2.60427	1.93643	0.0256258
GIC7C		mingled zone - felsic	B GIC7CA2_3		51.084	0.6796	3.2738	18.613	0.2187	11.9152	11.8337	0.7312	0.3838	0	99.5358		7.52576	0.0753027	0.568391	0	0	0	0.0272868	2.2929	0	2.61693	1.8677	0	0.208838	0.0721239	0	0	0	0	0	15.2552	7.46457	0.535431	0	8	0.028339	0.0746904	0	0	0.370958	0	2.59565	1.9033	0.027065
GIC7C		mingled zone - felsic	B GIC7CA2_4		51.7549	0.0949	3.9767	17.7728	0.3275	12.1663	12.5382	0.3874	0.2401	0.0257	99.8406		7.5363	0.0103936	0.682433	0	0.00295859	0	0.0403884	2.16404	0	2.64113	1.95598	0	0.109364	0.0445972	0	0	0	0	0	15.1876	7.49155	0.508446	0	8	0.169935	0.0103319	0	0.00294102	0.27151	0	2.62545	1.87968	0.0401486
GIC7C		mingled zone - felsic	B GIC7CA2_5		49.0213	0.1143	6.4429	20.9065	0.2817	8.6633	12.3975	0.5081	0.388	0.0076	99.1316		7.30853	0.0128169	1.13203	0	0.000895784	0	0.0355689	2.60633	0	1.92554	1.98016	0	0.14686	0.073788	0	0	0	0	0	15.2225	7.29634	0.703657	0	8	0.426482	0.0127955	0	0.000894291	0.0765575	0	1.92233	2.52543	0.0355096
GIC7C		mingled zone - felsic	B GIC7CA2_6		54.2234	0.0325	0.9112	19.4606	0.2476	11.2721	12.7926	0.0574	0.0502	0	99.2282		7.93414	0.00357675	0.157129	0	0	0	0.0306833	2.38107	0	2.45891	2.00537	0	0.016283	0.00936971	0	0	0	0	0	14.9965	7.95524	0.0447554	0	8	0.112792	0.00358626	0	0	0	0	2.46545	2.38741	0.0307649
GIC7C		mingled zone - felsic	B GIC7CA2_7		50.9266	0.4351	3.8367	18.7696	0.2223	11.5939	12.1619	0.6234	0.3409	0	98.9931		7.49358	0.0481533	0.665323	0	0	0	0.0277028	2.30942	0	2.54331	1.9172	0	0.177836	0.0639854	0	0	0	0	0	15.2465	7.44349	0.556513	0	8	0.104362	0.0478314	0	0	0.305455	0	2.52631	1.98853	0.0275176
GIC7C		mingled zone - felsic	B GIC7CA2_8		50.8963	0.4354	3.7867	19.1841	0.2527	11.4776	11.7524	0.7738	0.3609	0.0374	99.0527		7.49802	0.0482437	0.657432	0	0.00435589	0	0.0315286	2.36322	0	2.52079	1.85485	0	0.221003	0.0678197	0	0	0	0	0	15.2673	7.42741	0.572594	0	8	0.0786475	0.0477894	0	0.00431487	0.429107	0	2.49705	1.91186	0.0312317
GIC7C		mingled zone - felsic	B GIC7CA2_9		50.5401	0.3474	3.9489	18.9974	0.261	11.4662	11.9346	0.786	0.3529	0.0433	98.7773		7.47019	0.0386205	0.687863	0	0.00505974	0	0.0326719	2.34797	0	2.52662	1.88984	0	0.22523	0.066536	0	0	0	0	0	15.2906	7.40808	0.591922	0	8	0.0902214	0.0382993	0	0.00501767	0.379308	0	2.50561	1.94914	0.0324003
GIC7C		mingled zone - felsic	B GIC7CA2_10		53.3984	0.035	1.7124	19.0887	0.3306	11.2262	12.8355	0.1603	0.101	0.028	99.2157		7.82975	0.00385993	0.295907	0	0.00324581	0	0.0410546	2.34045	0	2.45402	2.0163	0	0.0455682	0.0188908	0	0	0	0	0	15.049	7.8489	0.1511	0	8	0.145531	0.00386937	0	0.00325374	0	0	2.46002	2.34617	0.041155
GIC7C		mingled zone - mafic	B GIC7CA6_1		49.9942	0.8511	3.67745	15.7191	0.3817	14.8596	10.7128	0.7377	0.3657	0.0409	1.12924e+06		7.37739	0.0944617	0.639528	0	0.00477146	0	0.0477028	1.93961	0	3.269	1.69359	0	0.211043	0.0688362	0	0	0	0	0	15.3459	7.17191	0.621715	0.0918306	7.88545	0	0	0	0.00463856	1.24557	0	3.17795	0.571844	0
GIC7C		mingled zone - mafic	B GIC7CA6_2		49.7511	0.736	3.73771	15.3376	0.4373	14.7544	10.8886	0.8501	0.364	0.0369	1.12406e+06		7.37417	0.0820503	0.652899	0	0.00432396	0	0.0548945	1.90095	0	3.26029	1.72904	0	0.24428	0.068821	0	0	0	0	0	15.3717	7.19184	0.636756	0.0800215	7.90861	0	0	0	0.00421705	1.10926	0	3.17968	0.706843	0
GIC7C		mingled zone - mafic	B GIC7CA6_3		50.0855	0.727	3.83643	15.4286	0.3942	15.0042	10.9833	0.6465	0.3608	0.0201	1.13094e+06		7.37035	0.0804642	0.665325	0	0.00233839	0	0.0491283	1.89848	0	3.29165	1.73153	0	0.184439	0.0677254	0	0	0	0	0	15.3414	7.17296	0.647507	0.0783092	7.89878	0	0	0	0.00227577	1.19895	0	3.2035	0.595282	0
GIC7C		mingled zone - mafic	B GIC7CA6_4		49.769	0.624	3.95243	15.3149	0.3637	15.0843	10.7847	0.9466	0.3258	0.0305	1.12757e+06		7.34805	0.069293	0.687713	0	0.00356006	0	0.0454773	1.89073	0	3.32019	1.70586	0	0.270949	0.0613583	0	0	0	0	0	15.4032	7.14736	0.668931	0.0674005	7.88369	0	0	0	0.00346283	1.222	0	3.22951	0.545026	0
GIC7C		mingled zone - mafic	B GIC7CA6_5		49.3939	0.7361	4.0128	14.96	0.3767	14.8911	10.8398	1.1722	0.3949	0.0145	1.12288e+06		7.32775	0.0821345	0.701576	0	0.00170063	0	0.0473295	1.8558	0	3.29343	1.72282	0	0.337138	0.0747297	0	0	0	0	0	15.4444	7.15723	0.68525	0.0802232	7.9227	0	0	0	0.00166106	1.04553	0	3.21679	0.736012	0
GIC7C		mingled zone - mafic	B GIC7CA6_6		48.4794	0.9686	4.35442	15.6153	0.3318	14.1727	10.8786	0.9891	0.4341	0	1.1163e+06		7.2654	0.109179	0.769064	0	0	0	0.0421131	1.95684	0	3.1665	1.74661	0	0.287376	0.0829852	0	0	0	0	0	15.4261	7.09666	0.751203	0.106643	7.95451	0	0	0	0	1.04352	0	3.09296	0.863524	0
GIC7B	enclave	mingled zone - mafic	B GIC7BA2_1		53.9722	0.0652	0.4828	12.7034	0.3664	15.9783	11.2599	0.1296	0.0459	0.0104	95.0673		7.96358	0.00723565	0.0839529	0	0.00121316	0	0.045786	1.56733	0	3.51474	1.7799	0	0.0370725	0.00863893	0	0	0	0	0	15.0095	7.85253	0.0827822	0.00713475	7.94245	0	0	0	0.00119624	0.63252	0	3.46573	0.900552	0
GIC7B	enclave	mingled zone - mafic	B GIC7BA2_2		51.5431	0.4265	2.5127	16.3331	0.4792	14.7471	9.4523	0.6236	0.1619	0.029	97.0428		7.64405	0.0475734	0.439161	0	0.00340013	0	0.0601878	2.02546	0	3.2605	1.5018	0	0.179295	0.0306273	0	0	0	0	0	15.1921	7.37167	0.423513	0.0458782	7.84106	0	0	0	0.00327898	1.58068	0	3.14432	0.271715	0
GIC7B	enclave	mingled zone - mafic	B GIC7BA2_3		52.0307	0.539	2.8097	15.6289	0.4305	14.6107	11.1406	0.3996	0.1925	0.0163	97.923		7.59722	0.0591937	0.483487	0	0.0018816	0	0.0532362	1.90821	0	3.18047	1.74271	0	0.113117	0.0358538	0	0	0	0	0	15.1754	7.43497	0.473162	0.0579295	7.96606	0	0	0	0.00184142	0.961446	0	3.11254	0.906012	0.0181576
GIC7B	enclave	mingled zone - mafic	B GIC7BA2_4		51.8087	0.662	2.8462	15.7216	0.3911	14.5231	11.1198	0.6639	0.204	0.0171	98.3286		7.56667	0.0727196	0.489889	0	0.00197444	0	0.0483758	1.92	0	3.16218	1.73989	0	0.187981	0.038005	0	0	0	0	0	15.2277	7.41729	0.480218	0.0712841	7.96879	0	0	0	0.00193546	0.890168	0	3.09975	0.991932	0.0162139
GIC7B	enclave	mingled zone - mafic	B GIC7BA2_5		51.5822	0.4888	2.5155	16.232	0.488	14.8582	9.8898	0.5058	0.1703	0.0477	97.3281		7.61804	0.0542958	0.437822	0	0.00556938	0	0.0610383	2.00456	0	3.27141	1.56478	0	0.144821	0.0320824	0	0	0	0	0	15.1944	7.36167	0.423088	0.0524686	7.83722	0	0	0	0.00538195	1.49597	0	3.16131	0.337332	0
GIC7B	enclave	mingled zone - mafic	B GIC7BA2_6		51.2972	0.5072	2.6435	16.7558	0.5279	14.4837	9.7465	0.3771	0.1728	0.0009	96.8873		7.61186	0.0566068	0.462282	0	0.000105581	0	0.0663419	2.07905	0	3.20407	1.54942	0	0.108483	0.0327077	0	0	0	0	0	15.1709	7.34064	0.44581	0.0545898	7.84104	0	0	0	0.000101819	1.58064	0	3.0899	0.329351	0
GIC7B	enclave	mingled zone - mafic	B GIC7BA1_1		50.3327	0.1433	4.4584	15.3555	0.2908	13.6864	12.4588	0.2796	0.3003	0.0642	97.4092		7.41425	0.0158765	0.773974	0	0.00747648	0	0.0362786	1.8914	0	3.0056	1.96614	0	0.0798478	0.0564263	0	0	0	0	0	15.2473	7.33254	0.667456	0	8	0.0979885	0.0157015	0	0.00739408	0.501359	0	2.97248	1.3692	0.0358788
GIC7B	enclave	mingled zone - mafic	B GIC7BA1_3		50.9744	0.1067	4.0669	15.4831	0.3144	13.4372	12.3546	0.5158	0.224	0.2892	97.7834		7.47875	0.0117742	0.703186	0	0.0335444	0	0.0390659	1.89949	0	2.93907	1.9419	0	0.146712	0.0419212	0	0	0	0	0	15.2354	7.41889	0.581109	0	8	0.11645	0.01168	0	0.0332759	0.365232	0	2.91555	1.51906	0.0387533
GIC7B	enclave	mingled zone - mafic	B GIC7BA1_4		50.5995	0.1072	5.4145	13.1424	0.2196	14.613	12.533	0.5363	0.389	0.3103	98.1811		7.34458	0.0117033	0.926209	0	0.035608	0	0.0269955	1.59514	0	3.16217	1.94894	0	0.150917	0.0720243	0	0	0	0	0	15.2743	7.28718	0.712823	0	8	0.206148	0.0116118	0	0.0353297	0.356705	0	3.13745	1.22597	0.0267845
GIC7B	enclave	mingled zone - mafic	B GIC7BA1_5		49.2263	1.2311	4.7013	14.5248	0.3169	14.6597	11.2276	0.8307	0.4475	0.0686	97.4218		7.2538	0.136444	0.816425	0	0.00799166	0	0.0395484	1.78971	0	3.22046	1.77246	0	0.237313	0.0841144	0	0	0	0	0	15.3583	7.10922	0.800153	0.090626	8	0	0.0430982	0	0.00783238	0.898559	0	3.15627	0.855476	0.0387602
GIC7B	enclave	mingled zone - mafic	B GIC7BA3_1		51.3332	0.5521	3.8909	13.2905	0.2822	15.3088	12.4458	0.4776	0.229	0.1112	98.3888		7.44314	0.0602098	0.664872	0	0.012747	0	0.034654	1.6114	0	3.30921	1.93331	0	0.134255	0.0423548	0	0	0	0	0	15.2461	7.36595	0.634047	0	8	0.0239301	0.0595854	0	0.0126148	0.472074	0	3.27489	1.12261	0.0342946
GIC7B	enclave	mingled zone - mafic	B GIC7BA3_2		51.9978	0.1314	2.7765	14.4773	0.223	14.7923	12.1648	0.2333	0.1093	0.2542	97.1949		7.61371	0.014471	0.479114	0	0.029426	0	0.0276538	1.77256	0	3.22903	1.90826	0	0.0662269	0.0204146	0	0	0	0	0	15.1609	7.51773	0.473075	0.00919299	8	0	0.00509559	0	0.0290551	0.572554	0	3.18832	1.17767	0.0273052
GIC7B	enclave	mingled zone - mafic	B GIC7BA3_3		52.3925	0.1366	2.7886	15.5066	0.2998	14.1594	12.2185	0.3557	0.147	0.2613	98.4673		7.62252	0.0149476	0.47813	0	0.0300548	0	0.0369402	1.88647	0	3.07114	1.90445	0	0.100328	0.0272807	0	0	0	0	0	15.1722	7.54119	0.458807	0	8	0.0142218	0.0147881	0	0.0297341	0.485532	0	3.03837	1.38081	0.0365461
GIC7B	enclave	mingled zone - mafic	B GIC7BA3_4		50.5707	0.2186	4.659	14.3168	0.2913	14.0525	12.4187	0.396	0.2448	0.2343	97.4462		7.40861	0.0240868	0.804379	0	0.0271366	0	0.0361424	1.75383	0	3.06914	1.94911	0	0.112471	0.0457466	0	0	0	0	0	15.2307	7.33899	0.661008	0	8	0.135812	0.0238605	0	0.0268816	0.428216	0	3.0403	1.30913	0.0358028
GIC7B	enclave	mingled zone - mafic	B GIC7BA3_5		51.895	0.5101	2.2377	14.0946	0.3603	15.2155	12.0789	0.307	0.1737	0	96.9668		7.62011	0.0563356	0.387229	0	0	0	0.0448062	1.73058	0	3.33079	1.90014	0	0.0873941	0.0325345	0	0	0	0	0	15.1899	7.52184	0.382235	0.0556091	7.95968	0	0	0	0	0.585579	0	3.28783	1.12268	0.00390824
GIC7B	enclave	mingled zone - mafic	B GIC7BA3_6		50.8568	0.5268	2.7172	15.9893	0.5386	14.7304	10.9051	0.543	0.2036	0.0291	97.1543		7.5237	0.0586165	0.473734	0	0.00340346	0	0.0674819	1.97795	0	3.24879	1.72836	0	0.155737	0.0384211	0	0	0	0	0	15.2762	7.32443	0.461187	0.0570641	7.84268	0	0	0	0.00331332	1.18606	0	3.16275	0.647883	0
AGF12		mingled zone - felsic	B AGF12A4_1		48.3198	1.0076	5.8275	19.5086	0.4138	10.1674	11.5209	1.0993	0.5889	0.0196	98.7906		7.21261	0.113122	1.02513	0	0.00231296	0	0.0523114	2.43499	0	2.26257	1.84237	0	0.318121	0.112129	0	0	0	0	0	15.3757	7.15589	0.844112	0	8	0.172958	0.112232	0	0.00229477	0.35893	0	2.24478	2.05691	0.0519
AGF12		mingled zone - felsic	B AGF12A4_2		47.2608	1.3563	6.3014	20.6433	0.4805	10.1627	10.8507	1.4918	0.7717	0.0138	99.7292		7.05386	0.152256	1.10839	0	0.00162836	0	0.0607377	2.57637	0	2.26131	1.73502	0	0.431663	0.146921	0	0	0	0	0	15.5282	6.93933	1.06067	0	8	0.0297291	0.149784	0	0.00160192	0.734743	0	2.22459	1.7998	0.0597515
AGF12		mingled zone - felsic	B AGF12A4_3		47.8973	1.2324	5.8535	20.5089	0.5054	10.3905	10.4692	1.4275	0.6316	0.0081	99.1111		7.14998	0.138368	1.02977	0	0.000955924	0	0.0638951	2.55999	0	2.31236	1.67428	0	0.413122	0.120267	0	0	0	0	0	15.463	7.01226	0.987741	0	8	0.0221915	0.135703	0	0.000937512	0.868957	0	2.26782	1.64173	0.0626644
AGF12		mingled zone - felsic	B AGF12A4_4		48.2904	1.3976	5.6485	20.3076	0.486	10.4401	10.2037	1.4345	0.5897	0.0114	98.9823		7.19647	0.156651	0.992023	0	0.0013431	0	0.0613385	2.53058	0	2.31947	1.62906	0	0.414445	0.112098	0	0	0	0	0	15.4135	7.05649	0.943506	0	8	0.0292215	0.153604	0	0.00131698	0.8773	0	2.27435	1.60406	0.0601455
AGF12		mingled zone - felsic	B AGF12A4_5		47.5036	1.4772	6.2033	20.5032	0.4844	10.2579	10.5886	1.5486	0.6987	0	99.7324		7.07938	0.165577	1.08949	0	0	0	0.061138	2.55501	0	2.27904	1.69055	0	0.447421	0.132821	0	0	0	0	0	15.5004	6.9565	1.0435	0	8	0.0270728	0.162703	0	0	0.784574	0	2.23948	1.72609	0.0600768
AGF12		mingled zone - felsic	B AGF12A1_1		48.1567	1.5524	6.1736	19.7797	0.4813	10.1781	10.601	1.3548	0.7097	0.0179	99.5047		7.15381	0.173451	1.08081	0	0.00210222	0	0.060553	2.45699	0	2.2541	1.68713	0	0.39018	0.134482	0	0	0	0	0	15.3936	7.05514	0.944861	0	8	0.121042	0.171058	0	0.00207323	0.625725	0	2.22301	1.79738	0.0597178
AGF12		mingled zone - felsic	B AGF12A1_2		52.026	0.1983	3.6941	17.8766	0.2538	11.7631	11.7279	0.5822	0.2881	0	98.4716		7.62685	0.0218645	0.63821	0	0	0	0.0315105	2.19136	0	2.57082	1.8419	0	0.165465	0.0538737	0	0	0	0	0	15.1419	7.57985	0.420151	0	8	0.214126	0.0217298	0	0	0.281725	0	2.55498	1.89613	0.0313163
AGF12		mingled zone - felsic	B AGF12A1_3		52.797	0.1579	2.9145	18.4456	0.1929	11.9862	12.1126	0.5581	0.1853	0	99.68		7.68195	0.0172797	0.499754	0	0	0	0.0237702	2.24418	0	2.59997	1.88808	0	0.157428	0.0343911	0	0	0	0	0	15.1468	7.64262	0.357383	0	8	0.139812	0.0171912	0	0	0.234312	0	2.58666	1.99838	0.0236485
AGF12		mingled zone - felsic	B AGF12A1_4		46.7242	1.5628	6.296	20.9274	0.3905	9.8417	10.4773	1.4539	0.7503	0	98.7173		7.04491	0.177227	1.11874	0	0	0	0.0498648	2.63847	0	2.21222	1.69241	0	0.424988	0.144304	0	0	0	0	0	15.5031	6.91646	1.08354	0	8	0.0147989	0.173995	0	0	0.823446	0	2.17189	1.76692	0.0489556
AGF12		mingled zone - felsic	B AGF12A1_5		46.4321	1.4554	6.2265	20.7137	0.3896	9.9452	10.5558	1.5666	0.6784	0	98.3914		7.03529	0.165859	1.11183	0	0	0	0.0499944	2.62437	0	2.24648	1.71347	0	0.460183	0.131117	0	0	0	0	0	15.5386	6.91099	1.08901	0	8	0.00317276	0.162928	0	0	0.798375	0	2.20679	1.77963	0.0491111
AGF12		mingled zone - felsic	B AGF12A1_6		47.09	1.5093	6.0629	20.5653	0.4112	9.8164	10.5197	1.4386	0.681	0	98.6507		7.10461	0.171269	1.07801	0	0	0	0.0525416	2.59448	0	2.20795	1.70034	0	0.420785	0.131059	0	0	0	0	0	15.461	6.99227	1.00773	0	8	0.0532379	0.168561	0	0	0.715828	0	2.17304	1.83763	0.0517109
AGF12		mingled zone - felsic	B AGF12A1_7		47.0736	1.4038	5.8883	20.777	0.4046	9.878	10.524	1.506	0.6844	0.0178	99.0327		7.10884	0.159448	1.04795	0	0.00212513	0	0.051747	2.62366	0	2.2239	1.70264	0	0.440914	0.131838	0	0	0	0	0	15.4931	6.99177	1.00823	0	8	0.0224666	0.156822	0	0.00209014	0.745022	0	2.18728	1.83543	0.0508949
AGF12		mingled zone - felsic	B AGF12A1_8		46.2832	1.5697	6.391	21.0662	0.434	9.4737	10.4496	1.3933	0.7066	0	98.1456		7.03448	0.179439	1.14474	0	0	0	0.0558647	2.67731	0	2.14661	1.70149	0	0.410546	0.136991	0	0	0	0	0	15.4875	6.90778	1.09222	0	8	0.0319028	0.176207	0	0	0.813611	0	2.10795	1.81547	0.0548585
AGF12		mingled zone - felsic	B AGF12A1_9		46.7115	1.4342	6.0462	20.554	0.4456	9.954	10.5189	1.3512	0.6767	0	98.1179		7.08296	0.163566	1.08045	0	0	0	0.0572235	2.60609	0	2.25016	1.70877	0	0.397208	0.130887	0	0	0	0	0	15.4773	6.95433	1.04567	0	8	0.0151577	0.160595	0	0	0.820173	0	2.2093	1.73859	0.0561843
AGF12		mingled zone - felsic	B AGF12A1_10		47.5317	1.2486	5.6357	19.4186	0.347	10.3185	10.9903	0.9266	0.5819	0.0163	97.2243		7.19791	0.142213	1.00578	0	0.00195144	0	0.0445032	2.45892	0	2.32951	1.78301	0	0.272034	0.112404	0	0	0	0	0	15.3482	7.09919	0.900814	0	8	0.0911667	0.140262	0	0.00192468	0.622263	0	2.29756	1.80293	0.0438928
07-8-1-Z		mingled zone - felsic	B 078A3_1		47.6544	1.6734	6.7155	16.8078	0.3577	12.3249	11.0337	1.2547	0.6778	0.0903	98.8682		7.02573	0.185558	1.1668	0	0.010525	0	0.0446628	2.07206	0	2.70892	1.74274	0	0.358622	0.127467	0	0	0	0	0	15.4431	6.91181	1.08819	0	8	0.0596943	0.182549	0	0.0103543	0.733782	0	2.665	1.30468	0.0439386
07-8-1-Z		mingled zone - felsic	B 078A3_2		46.7096	1.8769	7.075	16.5592	0.2833	12.2968	11.0149	1.4058	0.6817	0.0078	98.0691		6.94116	0.209777	1.23903	0	0.000916358	0	0.0356542	2.05763	0	2.72422	1.75359	0	0.405002	0.129219	0	0	0	0	0	15.4962	6.83164	1.16836	0	8	0.0511262	0.206468	0	0.0009019	0.714302	0	2.68124	1.31087	0.0350917
07-8-1-Z		mingled zone - felsic	B 078A3_3		45.7317	1.8632	7.224	16.4134	0.287	12.2477	10.9353	1.4356	0.6891	0.0261	97.5182		6.88187	0.210883	1.28114	0	0.00310509	0	0.0365772	2.06534	0	2.7477	1.76296	0	0.418824	0.132276	0	0	0	0	0	15.5407	6.76397	1.23603	0	8	0.0231567	0.207269	0	0.00305189	0.774621	0	2.70062	1.25533	0.0359505
07-8-1-Z		mingled zone - felsic	B 078A3_4		46.5183	1.8916	7.1635	16.8452	0.3147	12.4767	10.9754	1.1729	0.6939	0.0487	98.5225		6.90746	0.211259	1.25357	0	0.005717	0	0.0395758	2.09158	0	2.76197	1.74597	0	0.337648	0.131432	0	0	0	0	0	15.4862	6.76634	1.22796	0.00569914	8	0	0.201244	0	0.0056002	0.92058	0	2.70554	1.12827	0.0387673
07-8-1-Z		mingled zone - felsic	B 078A3_5		55.5582	0.0305	0.3414	13.5625	0.2802	16.2746	12.4425	0.0068	0.0346	0	98.5645		7.93861	0.00327784	0.0574897	0	0	0	0.0339081	1.62046	0	3.46682	1.9047	0	0.00188371	0.0063064	0	0	0	0	0	15.0335	7.86566	0.0569614	0.00324772	7.92587	0	0	0	0	0.418839	0	3.43496	1.1462	0
07-8-1-Z		mingled zone - felsic	B 078A3_6		47.3401	1.8169	7.0188	16.4283	0.2618	12.6053	11.032	1.393	0.6446	0.0383	98.7665		6.9708	0.201222	1.218	0	0.00445859	0	0.0326484	2.02278	0	2.76714	1.74032	0	0.397661	0.121075	0	0	0	0	0	15.4761	6.85632	1.14368	0	8	0.0543201	0.197918	0	0.00438537	0.743027	0	2.7217	1.24654	0.0321122
07-8-1-Z		mingled zone - felsic	B 078A3_7		47.4357	1.7574	6.818	16.0991	0.2444	12.7371	10.9467	1.5031	0.6404	0.0113	98.3456		7.00129	0.19509	1.18593	0	0.00131855	0	0.0305501	1.98691	0	2.80265	1.73092	0	0.4301	0.120568	0	0	0	0	0	15.4853	6.89326	1.10674	0	8	0.0608935	0.19208	0	0.0012982	0.698834	0	2.7594	1.25741	0.0300787
07-8-1-Z		mingled zone - felsic	B 078A3_8		46.8668	1.8418	7.1262	16.6168	0.2759	12.2235	11.0437	1.1826	0.7336	0.0488	98.3809		6.95638	0.205614	1.24654	0	0.00572642	0	0.0346824	2.06238	0	2.70482	1.75612	0	0.340302	0.138895	0	0	0	0	0	15.4515	6.84261	1.15739	0	8	0.0687658	0.202251	0	0.00563276	0.740021	0	2.66058	1.28863	0.0341151
07-8-1-Z		mingled zone - felsic	B 078A3_9		46.9799	1.7322	7.2485	15.9662	0.2849	12.1619	10.8587	1.1399	0.6832	0	97.2036		7.00392	0.194231	1.27352	0	0	0	0.0359716	1.99037	0	2.70306	1.73432	0	0.329461	0.129923	0	0	0	0	0	15.3948	6.89724	1.10276	0	8	0.151365	0.191273	0	0	0.689989	0	2.66189	1.27006	0.0354237
07-8-1-Z		mingled zone - mafic	B 078A2_1		47.0871	1.6292	6.8455	17.4295	0.4933	11.6457	10.9147	1.129	0.6656	0.0495	98.0336		7.01651	0.182594	1.20214	0	0.00583136	0	0.0622543	2.17174	0	2.58708	1.74242	0	0.326153	0.126515	0	0	0	0	0	15.4232	6.8955	1.1045	0	8	0.0769026	0.179444	0	0.00573078	0.779698	0	2.54246	1.35458	0.0611806
07-8-1-Z		mingled zone - mafic	B 078A2_2		53.5501	0.1399	2.5561	13.8462	0.2213	14.9114	12.6375	0.2635	0.0975	0.0712	98.3008		7.70911	0.0151479	0.433663	0	0.00810343	0	0.0269814	1.66678	0	3.20028	1.94907	0	0.0735416	0.0179043	0	0	0	0	0	15.1006	7.67366	0.326341	0	8	0.105327	0.0150783	0	0.00806617	0.210582	0	3.18556	1.44853	0.0268573
07-8-1-Z		mingled zone - mafic	B 078A2_3		46.9412	1.7169	6.7083	16.6102	0.3709	11.9047	11.0704	1.1912	0.6996	0.047	97.4435		7.02021	0.193122	1.18233	0	0.00555698	0	0.0469777	2.07718	0	2.65423	1.7737	0	0.345373	0.133461	0	0	0	0	0	15.4321	6.92454	1.07546	0	8	0.0907564	0.190491	0	0.00548125	0.618325	0	2.61806	1.43055	0.0463375
07-8-1-Z		mingled zone - mafic	B 078A2_4		46.4187	1.6387	6.7775	17.3536	0.3492	11.7895	11.0372	1.3505	0.649	0.0069	98.0725		6.96788	0.185012	1.19897	0	0.000818845	0	0.0443936	2.17821	0	2.63832	1.77496	0	0.393016	0.124269	0	0	0	0	0	15.5059	6.85524	1.14476	0	8	0.0348241	0.182021	0	0.000805608	0.731613	0	2.59567	1.41139	0.043676
07-8-1-Z		mingled zone - mafic	B 078A2_5		49.9541	0.6418	4.2703	15.192	0.3984	13.4936	11.818	0.6903	0.3653	0.0341	97.0421		7.40379	0.0715442	0.745884	0	0.0039956	0	0.0500082	1.88279	0	2.98151	1.8765	0	0.198349	0.0690624	0	0	0	0	0	15.2834	7.32518	0.674823	0	8	0.0631415	0.0707846	0	0.00395318	0.483248	0	2.94985	1.37955	0.0494772
07-8-1-Z		mingled zone - mafic	B 078A2_6		51.0209	0.6539	4.1404	15.4526	0.4231	13.6539	12.0356	0.8148	0.3165	0.0455	98.6433		7.43088	0.0716301	0.710665	0	0.005239	0	0.0521884	1.8819	0	2.96465	1.87794	0	0.230066	0.0587997	0	0	0	0	0	15.284	7.36451	0.635489	0	8	0.0688286	0.0709903	0	0.00519221	0.407197	0	2.93817	1.4579	0.0517223
07-8-1-Z		mingled zone - mafic	B 078A2_7		47.1007	1.826	7.0215	16.7553	0.3718	11.7537	11.088	1.4607	0.6888	0.0583	98.3686		6.98861	0.203777	1.22779	0	0.00683875	0	0.0467209	2.07883	0	2.59994	1.76254	0	0.420177	0.130366	0	0	0	0	0	15.4656	6.90758	1.09242	0	8	0.12113	0.201415	0	0.00675946	0.527156	0	2.56979	1.52757	0.0461792
07-8-1-Z		mingled zone - mafic	B 078A2_8		46.9755	1.8015	6.9312	17.3242	0.4006	11.6578	11.1221	1.2551	0.694	0.0182	98.315		6.9834	0.201429	1.21432	0	0.002139	0	0.0504365	2.15353	0	2.58367	1.77135	0	0.361728	0.131602	0	0	0	0	0	15.4536	6.88336	1.11664	0	8	0.0802903	0.198543	0	0.00210836	0.649499	0	2.54666	1.47319	0.049714
07-8-1-Z		mingled zone - mafic	B 078A1_1		48.0603	1.6788	6.5888	15.8761	0.2701	12.827	11.2672	1.3684	0.6518	0	98.8575		7.05267	0.185292	1.13947	0	0	0	0.0335684	1.94811	0	2.80619	1.77135	0	0.389303	0.122009	0	0	0	0	0	15.448	6.96412	1.03588	0	8	0.0892801	0.182966	0	0	0.570306	0	2.77096	1.35335	0.0331469
07-8-1-Z		mingled zone - mafic	B 078A1_2		52.6198	0.3134	4.1136	15.11	0.3331	13.6682	11.8289	0.369	0.2389	0.0279	98.674		7.58817	0.0339922	0.699101	0	0.00318081	0	0.0406819	1.82203	0	2.93849	1.82749	0	0.103163	0.0439454	0	0	0	0	0	15.1002	7.51553	0.484467	0	8	0.207942	0.0336668	0	0.00315036	0.436141	0	2.91036	1.36845	0.0402925
07-8-1-Z		mingled zone - mafic	B 078A1_3		52.1127	0.4994	3.5783	15.3424	0.377	14.1014	11.9737	0.581	0.2907	0.0096	99.3361		7.53543	0.0543131	0.609777	0	0.00109744	0	0.0461684	1.85507	0	3.03985	1.85487	0	0.162873	0.053619	0	0	0	0	0	15.2131	7.45418	0.545823	0	8	0.0573789	0.0537275	0	0.00108561	0.490649	0	3.00707	1.34442	0.0456705
07-8-1-Z		mingled zone - mafic	B 078A1_4		52.7746	0.2868	3.1711	15.0168	0.3243	13.8561	12.3675	0.3788	0.1631	0.0209	98.4661		7.64269	0.0312387	0.541205	0	0.00239283	0	0.0397747	1.81845	0	2.99149	1.91878	0	0.106351	0.030129	0	0	0	0	0	15.1225	7.60336	0.396637	0	8	0.141783	0.0310779	0	0.00238052	0.23551	0	2.97609	1.57358	0.03957
07-8-1-Z		mingled zone - mafic	B 078A1_5		47.3647	1.7541	6.9171	17.5805	0.4394	11.4609	11.1946	1.2589	0.6645	0.075	98.8555		7.00658	0.195163	1.20588	0	0.00877117	0	0.0550491	2.17463	0	2.52752	1.77412	0	0.361036	0.125388	0	0	0	0	0	15.4341	6.91425	1.08575	0	8	0.104241	0.192591	0	0.00865558	0.598199	0	2.49421	1.54778	0.0543237
07-8-1-Z		mingled zone - mafic	B 078A1_6		52.1463	0.4284	3.618	15.6924	0.4118	13.6404	11.8999	0.6127	0.25	0.0338	98.872		7.55835	0.046703	0.618019	0	0.00387316	0	0.0505509	1.90194	0	2.94751	1.84786	0	0.172171	0.0462224	0	0	0	0	0	15.1932	7.48526	0.514743	0	8	0.0972997	0.0462514	0	0.0038357	0.440544	0	2.91901	1.443	0.050062
07-8-1-Z		mingled zone - mafic	B 078A1_7		51.9275	0.3925	3.6984	15.6635	0.3773	13.597	12.0125	0.4922	0.2637	0.0225	98.9732		7.54892	0.042916	0.633624	0	0.00258592	0	0.0464529	1.90405	0	2.94683	1.87087	0	0.138719	0.0488997	0	0	0	0	0	15.1839	7.47681	0.523194	0	8	0.104377	0.042506	0	0.00256122	0.435231	0	2.91868	1.45063	0.0460092
0019		granite	B 0019A2_1		52.7017	0.7138	2.5234	13.8444	0.2231	15.0409	12.0256	0.3172	0.2876	0.0553	98.045		7.64436	0.0778727	0.431353	0	0.00634142	0	0.0274066	1.67917	0	3.25249	1.86872	0	0.0891986	0.0532126	0	0	0	0	0	15.1301	7.57503	0.424972	0	8	0.00246873	0.0771664	0	0.00628391	0.413432	0	3.22299	1.25051	0.027158
0019		granite	B 0019A2_2		52.4316	0.5613	2.8725	15.1079	0.2731	14.1115	12.0399	0.3998	0.3045	0.0602	98.5422		7.62091	0.0613621	0.492044	0	0.00691759	0	0.0336182	1.8362	0	3.05782	1.87482	0	0.112659	0.056456	0	0	0	0	0	15.1528	7.55762	0.442384	0	8	0.0455729	0.0608525	0	0.00686014	0.378875	0	3.03242	1.44208	0.033339
0019		granite	B 0019A2_3		52.7113	0.482	2.7198	15.052	0.2914	14.543	11.8101	0.5549	0.279	0.0206	99.0765		7.63151	0.0524863	0.46406	0	0.00235787	0	0.0357302	1.82223	0	3.13896	1.83182	0	0.155751	0.0515252	0	0	0	0	0	15.1864	7.54599	0.454014	0	8	0.00484537	0.0518981	0	0.00233144	0.509732	0	3.10378	1.29208	0.0353298
0019		granite	B 0019A2_4		53.021	0.5001	2.7004	15.1261	0.3448	14.1804	11.9866	0.3979	0.2293	0.0231	98.6839		7.66732	0.0543932	0.460208	0	0.0026409	0	0.0422281	1.82905	0	3.0571	1.85701	0	0.111552	0.0422969	0	0	0	0	0	15.1238	7.60128	0.398718	0	8	0.0575265	0.0539247	0	0.00261816	0.392759	0	3.03077	1.42054	0.0418644
0019		granite	B 0019A2_5		53.0562	0.4503	2.4156	14.4464	0.2679	14.6284	12.0142	0.3921	0.2268	0.0189	98.369		7.69448	0.0491176	0.412855	0	0.00216695	0	0.0329044	1.75189	0	3.16275	1.86664	0	0.110242	0.0419561	0	0	0	0	0	15.125	7.63215	0.367845	0	8	0.0416664	0.0487197	0	0.0021494	0.369572	0	3.13713	1.36812	0.0326379
0019		granite	B 0019A2_6		51.8206	0.767	2.9915	16.1424	0.439	13.7599	11.1102	0.3543	0.3468	0.0298	98.1078		7.59305	0.084528	0.516574	0	0.00345203	0	0.0544774	1.97781	0	3.00575	1.74404	0	0.100645	0.0648188	0	0	0	0	0	15.1451	7.45786	0.507377	0.0347594	8	0	0.0482637	0	0.00339057	0.804376	0	2.95224	1.13822	0.0535075
0019		granite	B 0019A2_7		52.3482	0.2188	3.7821	14.8711	0.3113	13.9987	12.49	0.3957	0.1842	0.03	98.6641		7.56301	0.0237756	0.643956	0	0.00342657	0	0.03809	1.79655	0	3.01513	1.9332	0	0.110833	0.0339462	0	0	0	0	0	15.1619	7.51449	0.485508	0	8	0.154317	0.0236231	0	0.00340458	0.293195	0	2.99578	1.49183	0.0378456
0019		granite	B 0019A2_9		53.056	0.0714	3.1858	14.7612	0.3651	13.7156	12.2959	0.3514	0.1162	0.0307	98.1294		7.69534	0.00778903	0.544555	0	0.00352027	0	0.0448481	1.79027	0	2.96574	1.91062	0	0.0988105	0.0214985	0	0	0	0	0	15.083	7.66465	0.335354	0	8	0.20703	0.00775796	0	0.00350623	0.182732	0	2.95391	1.6004	0.0446692
0019		granite	B 0019A1_1		51.8557	0.5946	3.4396	15.5231	0.3061	14.1471	11.801	0.4824	0.3104	0.0648	98.6333		7.52948	0.0649359	0.588581	0	0.00743855	0	0.0376418	1.88473	0	3.06239	1.83573	0	0.135795	0.0574909	0	0	0	0	0	15.2042	7.42935	0.570647	0	8	0.0101072	0.0640724	0	0.00733963	0.603565	0	3.02167	1.25611	0.0371413
0019		granite	B 0019A1_2		52.4459	0.5894	3.048	16.4918	0.4015	14.0566	11.3287	0.4762	0.3021	0.0331	99.319		7.58256	0.0640924	0.519337	0	0.00378336	0	0.0491619	1.99377	0	3.02977	1.75472	0	0.133476	0.055714	0	0	0	0	0	15.1864	7.44372	0.509828	0.0464547	8	0	0.0164641	0	0.00371408	0.826867	0	2.97429	1.1304	0.0482617
0019		granite	B 0019A1_3		52.8224	0.389	2.7546	14.8847	0.2761	14.6641	11.9691	0.3142	0.2486	0.0794	98.7691		7.63996	0.0423169	0.469528	0	0.009079	0	0.0338203	1.80018	0	3.16194	1.85463	0	0.0881023	0.0458652	0	0	0	0	0	15.1454	7.5489	0.451105	0	8	0.0128266	0.0418126	0	0.00897079	0.541737	0	3.12425	1.23699	0.0334172
0019		granite	B 0019A1_4		52.7255	0.4968	2.771	15.2101	0.307	14.5738	12.0065	0.457	0.265	0.0862	98.9728		7.60881	0.0539224	0.471262	0	0.0098344	0	0.0375209	1.8354	0	3.1354	1.85624	0	0.127856	0.048781	0	0	0	0	0	15.185	7.52079	0.46581	0.0134047	8	0	0.0398939	0	0.00972063	0.52602	0	3.09913	1.28815	0.0370868
0019		granite	B 0019A1_5		50.6686	0.9162	3.1243	16.6482	0.2899	13.3683	11.2373	0.4897	0.4644	0.0238	97.4308		7.51021	0.10214	0.545752	0	0.00278891	0	0.0363915	2.0634	0	2.95402	1.78442	0	0.140719	0.087804	0	0	0	0	0	15.2276	7.38819	0.536885	0.0749278	8	0	0.0255526	0	0.0027436	0.735231	0	2.90603	1.29464	0.0358002
0019		granite	B 0019A1_6		52.6255	0.4242	2.7236	15.0916	0.2934	14.692	11.9818	0.4095	0.2868	0.0734	98.9548		7.61355	0.0461586	0.46437	0	0.00839521	0	0.0359492	1.8257	0	3.16881	1.8571	0	0.114856	0.0529272	0	0	0	0	0	15.1878	7.51931	0.458622	0.0220702	8	0	0.023517	0	0.00829129	0.562323	0	3.12959	1.24078	0.0355042
0019		granite	B 0019A3_1		52.7114	0.5296	2.7692	15.8574	0.3144	13.864	11.9933	0.4057	0.2484	0.0417	98.8309		7.63648	0.057707	0.472795	0	0.00477606	0	0.0385754	1.92098	0	2.99435	1.86144	0	0.113947	0.0459039	0	0	0	0	0	15.147	7.56337	0.436632	0	8	0.0316368	0.0571545	0	0.00473033	0.43618	0	2.96568	1.46641	0.038206
0019		granite	B 0019A3_2		53.0165	0.3925	2.6303	15.9829	0.2894	14.3885	11.9004	0.378	0.2658	0.0306	99.3766		7.63759	0.0425282	0.446561	0	0.00348507	0	0.0353088	1.92532	0	3.09019	1.83666	0	0.105571	0.0488438	0	0	0	0	0	15.1721	7.53272	0.440429	0.0268535	8	0	0.0150907	0	0.00343722	0.622963	0	3.04776	1.27592	0.0348239
0019		granite	B 0019A3_3		53.6934	0.1659	3.3266	14.8302	0.2277	14.0602	12.4884	0.3537	0.1162	0.0496	99.3493		7.67398	0.0178335	0.560312	0	0.00560436	0	0.0275614	1.77235	0	2.99582	1.91218	0	0.0980038	0.0211843	0	0	0	0	0	15.0848	7.64255	0.35745	0	8	0.200567	0.0177605	0	0.00558141	0.187618	0	2.98355	1.57747	0.0274485
0019		granite	B 0019A3_4		54.1133	0.3724	2.3052	14.4083	0.2472	15.1719	12.1782	0.3028	0.1906	0.0351	100.07		7.7189	0.0399533	0.387517	0	0.00395825	0	0.0298634	1.71857	0	3.22639	1.86104	0	0.0837367	0.0346804	0	0	0	0	0	15.1046	7.6453	0.354699	0	8	0.0291228	0.0395724	0	0.00392051	0.434444	0	3.19562	1.26774	0.0295786
0019		granite	B 0019A3_5		53.836	0.27	1.9893	14.4758	0.2021	14.8908	12.4362	0.2494	0.1564	0.0488	99.0382		7.74897	0.0292299	0.337444	0	0.00555311	0	0.0246364	1.74228	0	3.19532	1.9177	0	0.0695948	0.0287156	0	0	0	0	0	15.0995	7.69956	0.300445	0	8	0.0348478	0.0290435	0	0.0055177	0.291491	0	3.17494	1.43968	0.0244793
0019		granite	B 0019A3_6		53.9676	0.1565	2.1768	14.0443	0.2091	14.8362	12.4317	0.3814	0.1578	0.0633	98.7017		7.76166	0.0169289	0.368952	0	0.00719731	0	0.0254692	1.68898	0	3.18104	1.91546	0	0.106343	0.0289493	0	0	0	0	0	15.101	7.73178	0.268216	0	8	0.0993167	0.0168637	0	0.00716961	0.176364	0	3.1688	1.50612	0.0253711
G143.1		granophyre	B G143.1A1_1		46.4322	0.1422	6.3957	21.8299	0.3091	8.8289	11.6719	0.9625	0.6551	0	97.5785		7.12352	0.0164084	1.15636	0	0	0	0.0401618	2.80047	0	2.01933	1.9184	0	0.286276	0.128201	0	0	0	0	0	15.4891	7.03892	0.961082	0	8	0.181546	0.0162136	0	0	0.539833	0	1.99535	2.22738	0.0396848
G143.1		granophyre	B G143.1A1_2		53.038	0.0334	0.9234	19.4823	0.3631	11.9476	12.1356	0.1031	0.09	0.0025	98.4438		7.85343	0.00371972	0.161136	0	0.000292656	0	0.0455341	2.41221	0	2.63741	1.92511	0	0.0295964	0.016999	0	0	0	0	0	15.0854	7.78532	0.159738	0.00368746	7.94874	0	0	0	0.000290117	0.395484	0	2.61454	1.98969	0
G143.1		granophyre	B G143.1A1_3		50.6757	0.2054	3.3431	20.6902	0.3271	10.4988	11.9392	0.5678	0.3057	0.0017	98.996		7.55187	0.0230222	0.58713	0	0.000200285	0	0.0412833	2.57824	0	2.33249	1.90613	0	0.164043	0.0581112	0	0	0	0	0	15.2425	7.48609	0.51391	0	8	0.0681061	0.0228217	0	0.000198541	0.397203	0	2.31217	2.15858	0.0409237
G143.1		granophyre	B G143.1A1_4		50.8529	0.0696	3.6382	19.751	0.3149	10.7068	12.0988	0.5268	0.2786	0	98.2377		7.56367	0.00778606	0.637725	0	0	0	0.0396669	2.45645	0	2.37411	1.92788	0	0.151905	0.0528575	0	0	0	0	0	15.2121	7.51775	0.482254	0	8	0.151599	0.00773878	0	0	0.277607	0	2.3597	2.16393	0.039426
G143.1		granophyre	B G143.1A1_5		53.0251	0.0415	1.4976	19.2905	0.3045	11.7198	12.0365	0.234	0.1587	0.0363	98.3546		7.82349	0.00460531	0.260402	0	0.00423419	0	0.0380492	2.37994	0	2.57789	1.90257	0	0.0669335	0.0298679	0	0	0	0	0	15.088	7.77053	0.229473	0	8	0.029166	0.00457413	0	0.00420553	0.309315	0	2.56044	2.05451	0.0377916
G143.1		granophyre	B G143.1A1_6		48.7419	0.2504	4.7734	22.0514	0.3063	9.3624	11.5069	0.9419	0.3755	0	98.3725		7.35437	0.0284164	0.848792	0	0	0	0.0391407	2.78216	0	2.10599	1.86005	0	0.275522	0.0722707	0	0	0	0	0	15.3667	7.26558	0.734418	0	8	0.104126	0.0280733	0	0	0.54867	0	2.08056	2.1999	0.0386682
G143.1		granophyre	B G143.1A1_7		49.7662	0.1373	3.8039	21.9657	0.3401	10.0266	11.6246	0.7451	0.3179	0.041	98.836		7.45712	0.0154739	0.671732	0	0.00485697	0	0.0431601	2.75223	0	2.23983	1.86611	0	0.216451	0.0607626	0	0	0	0	0	15.3277	7.35282	0.647182	0	8	0.0151547	0.0152575	0	0.00478904	0.634373	0	2.2085	2.07936	0.0425564
G143.1		granophyre	B G143.1A1_8		52.2611	0.0388	1.5704	19.8759	0.381	11.6182	12.1445	0.2215	0.1218	0	98.2477		7.75873	0.00433247	0.274759	0	0	0	0.0479044	2.46741	0	2.57143	1.93158	0	0.063752	0.0230658	0	0	0	0	0	15.143	7.68509	0.272151	0.00429135	7.96153	0	0	0	0	0.432457	0	2.54703	2.01154	0.00897865
G143.1		granophyre	B G143.1A1_9		49.0814	0.0656	4.3009	20.545	0.3279	10.1659	12.0167	0.6406	0.392	0	97.5411		7.41596	0.00745498	0.765844	0	0	0	0.0419596	2.59573	0	2.28993	1.94517	0	0.187649	0.075552	0	0	0	0	0	15.3253	7.34988	0.65012	0	8	0.1089	0.00738855	0	0	0.406256	0	2.26952	2.16635	0.0415857
G143.1		granophyre	B G143.1A2_1		53.0034	0.0496	1.2155	19.6997	0.429	11.3472	12.1207	0.1398	0.0957	0.0127	98.7982		7.85592	0.00552926	0.212314	0	0.00148813	0	0.0538505	2.4415	0	2.5073	1.92461	0	0.0401707	0.0180932	0	0	0	0	0	15.0608	7.80912	0.190876	0	8	0.0201729	0.00549632	0	0.00147927	0.272389	0	2.49237	2.15456	0.0535297
G143.1		granophyre	B G143.1A2_2		49.1442	0.2349	4.7409	21.1579	0.4043	9.5553	11.7916	0.835	0.4093	0	98.3768		7.38744	0.0265581	0.839871	0	0	0	0.0514712	2.65948	0	2.14137	1.89896	0	0.243342	0.0784825	0	0	0	0	0	15.327	7.32758	0.672416	0	8	0.16065	0.0263429	0	0	0.369691	0	2.12402	2.26825	0.0510542
G143.1		granophyre	B G143.1A2_3		52.9988	0.0765	1.6885	19.3507	0.3481	11.2426	12.343	0.3031	0.1442	0.0186	98.9219		7.81568	0.00848504	0.293448	0	0.00216849	0	0.0434754	2.38616	0	2.47168	1.95004	0	0.0866552	0.0271253	0	0	0	0	0	15.0849	7.80302	0.196985	0	8	0.0959882	0.00847129	0	0.00216498	0.074416	0	2.46767	2.30788	0.0434049
G143.1		granophyre	B G143.1A2_4		53.093	0.0644	1.4384	19.4161	0.3623	11.435	12.4051	0.2101	0.1189	0	98.5543		7.82857	0.00714206	0.249951	0	0	0	0.0452431	2.39393	0	2.51366	1.9596	0	0.0600593	0.0223633	0	0	0	0	0	15.0805	7.80546	0.19454	0	8	0.0546729	0.00712097	0	0	0.135414	0	2.50624	2.25144	0.0451095
G143.1		granophyre	B G143.1A2_5		50.1467	0.1966	4.1628	20.5673	0.4	10.0295	11.7918	0.7155	0.3582	0.0093	98.3778		7.4893	0.0220838	0.73268	0	0.00109806	0	0.0505938	2.5685	0	2.23307	1.88669	0	0.207165	0.0682391	0	0	0	0	0	15.2594	7.43365	0.566352	0	8	0.160884	0.0219197	0	0.0010899	0.3393	0	2.21648	2.21011	0.0502178
G143.1		granophyre	B G143.1A2_6		49.4505	0.2017	4.6682	21.6242	0.3812	9.3487	11.8651	0.7524	0.4677	0	98.9398		7.40771	0.0227254	0.824124	0	0	0	0.048362	2.70867	0	2.0878	1.90417	0	0.218509	0.0893695	0	0	0	0	0	15.3114	7.3515	0.648497	0	8	0.169374	0.0225529	0	0	0.346377	0	2.07196	2.34174	0.0479951
G143.1		granophyre	B G143.1A2_7		52.425	0.0188	2.738	18.5722	0.4789	12.0132	12.0151	0.3841	0.1166	0.0085	98.9611		7.68538	0.00207289	0.473031	0	0.000985122	0	0.0594579	2.27663	0	2.62549	1.88702	0	0.109164	0.0218039	0	0	0	0	0	15.141	7.61332	0.386682	0	8	0.0819138	0.00205345	0	0.000975886	0.427255	0	2.60087	1.82803	0.0589005
GIC6		Basalt dyke	B GIC6A2_1		52.5144	0.1238	4.2597	12.5247	0.2641	14.9172	12.5456	0.4699	0.3004	0.2068	98.1584		7.54831	0.0133839	0.721574	0	0.0235	0	0.0321498	1.50537	0	3.19657	1.9319	0	0.130944	0.0550783	0	0	0	0	0	15.1588	7.52467	0.475333	0	8	0.24398	0.013342	0	0.0234263	0.143653	0	3.18655	1.357	0.0320491
GIC6		Basalt dyke	B GIC6A2_2		50.219	0.779	5.4883	13.8735	0.3491	13.7819	12.0832	0.7285	0.4154	0.465	98.559		7.3001	0.0851706	0.940218	0	0.053439	0	0.0429783	1.68636	0	2.98672	1.88176	0	0.205304	0.0770258	0	0	0	0	0	15.2591	7.24715	0.752852	0	8	0.180546	0.0845529	0	0.0530514	0.331223	0	2.96506	1.3429	0.0426666
GIC6		Basalt dyke	B GIC6A2_3		55.6153	0.0492	1.5181	9.2802	0.2584	18.0977	12.8963	0.1667	0.1089	0.2838	99.0631		7.83164	0.00521094	0.251935	0	0.0315948	0	0.030817	1.09275	0	3.79933	1.94557	0	0.0455096	0.0195612	0	0	0	0	0	15.0539	7.80566	0.194341	0	8	0.0567584	0.00519364	0	0.03149	0.152125	0	3.78672	0.936995	0.0307147
GIC6		Basalt dyke	B GIC6A2_4		49.4926	0.2574	6.5641	14.3407	0.3166	13.1763	12.4653	0.6701	0.5527	0.4145	98.6631		7.21708	0.0282307	1.12805	0	0.0477849	0	0.0390995	1.74862	0	2.86444	1.94736	0	0.189439	0.102806	0	0	0	0	0	15.3129	7.17662	0.823383	0	8	0.298338	0.0280724	0	0.047517	0.256451	0	2.84838	1.48236	0.0388803
GIC6		Basalt dyke	B GIC6A2_5		54.035	0.0612	2.9301	12.1503	0.2884	15.8064	12.571	0.3365	0.1902	0.1514	99.1301		7.69991	0.00655925	0.492066	0	0.0170562	0	0.0348052	1.44777	0	3.35791	1.91912	0	0.0929617	0.0345725	0	0	0	0	0	15.1027	7.66684	0.33316	0	8	0.156792	0.00653107	0	0.0169829	0.196732	0	3.34348	1.24482	0.0346557
GIC6		Basalt dyke	B GIC6A2_6		49.9292	0.9337	6.316	13.1851	0.3361	13.6496	12.2426	0.9697	0.2146	0.4441	98.578		7.23127	0.101709	1.07803	0	0.0508494	0	0.0412256	1.59679	0	2.94717	1.89957	0	0.272274	0.039646	0	0	0	0	0	15.2585	7.2052	0.794802	0	8	0.279345	0.101342	0	0.050666	0.165268	0	2.93654	1.42576	0.041077
GIC6		Basalt dyke	B GIC6A2_7		53.5319	0.1604	3.8863	12.0259	0.2733	15.6602	11.7762	0.351	0.6447	0.199	98.5355		7.62787	0.0171904	0.652615	0	0.0224176	0	0.0329814	1.43288	0	3.32669	1.7977	0	0.096963	0.117181	0	0	0	0	0	15.1245	7.56234	0.437662	0	8	0.209346	0.0170427	0	0.022225	0.391791	0	3.29811	1.02878	0.032698
GIC6		Basalt dyke	B GIC6A2_8		54.0181	0.1129	2.9306	11.9228	0.29	15.6812	12.6695	0.3353	0.1788	0.265	98.4855		7.70222	0.0121077	0.492451	0	0.0298722	0	0.0350198	1.42154	0	3.33335	1.93534	0	0.092687	0.0325202	0	0	0	0	0	15.0871	7.68652	0.313482	0	8	0.177965	0.012083	0	0.0298113	0.0936007	0	3.32655	1.32504	0.0349484
GIC6		Basalt dyke	B GIC6A2_9		53.1838	0.0829	3.9068	12.3618	0.2701	15.1021	12.6651	0.5277	0.2233	0.3975	98.7459		7.58956	0.00889782	0.657035	0	0.0448455	0	0.0326438	1.4751	0	3.21292	1.93628	0	0.145993	0.0406476	0	0	0	0	0	15.1439	7.57732	0.422681	0	8	0.233294	0.00888347	0	0.0447732	0.074076	0	3.20773	1.39865	0.0325911
GIC6		Basalt dyke	B GIC6A2_10		50.5356	1.2695	5.1137	15.174	0.3849	13.2642	11.9521	0.6993	0.5001	0.2135	99.4931		7.31644	0.138238	0.872504	0	0.0244368	0	0.0471942	1.83698	0	2.86291	1.85382	0	0.196279	0.0923567	0	0	0	0	0	15.2412	7.2613	0.738697	0	8	0.127232	0.137196	0	0.0242527	0.34404	0	2.84134	1.4791	0.0468386
GIC6		Basalt dyke	B GIC6A1_1		45.8805	2.2206	8.3163	14.5596	0.3517	12.5476	11.291	1.4441	0.6607	0.03	97.4158		6.81096	0.247938	1.45493	0	0.00352084	0	0.0442172	1.80731	0	2.77694	1.7957	0	0.41561	0.12511	0	0	0	0	0	15.4822	6.73542	1.26458	0	8	0.174204	0.245188	0	0.00348179	0.504568	0	2.74613	1.2827	0.0437268
GIC6		Basalt dyke	B GIC6A1_10		50.6891	0.2511	5.674	9.8847	0.2064	15.7105	14.4388	0.7206	0.4875	0.2961	99.114		7.26489	0.0270678	0.958372	0	0.0335504	0	0.0250532	1.18463	0	3.35683	2.21701	0	0.200225	0.0891247	0	0	0	0	0	15.3568	7.34947	0.650528	0	8	0.319001	0.0273829	0	0.033941	0	0	3.39591	1.19842	0.0253449
GIC6		Basalt dyke	B GIC6B1_1		49.3124	0.7876	5.5446	13.8422	0.3104	13.8162	12.1737	0.6221	0.5215	0	97.038		6.26566	0.192437	2.15928	0	0.0719201	0	0.0288918	0.880738	0	3.56855	1.97052	0	0.487761	0.0888445	0	0	0	0	0	15.7146	6.18597	1.81403	0	8	0.31778	0.18999	0	0.0710053	0.577636	0	3.52317	0.2919	0.0285244
GIC6		Basalt dyke	B GIC6B1_2		45.7786	2.5331	8.047	14.981	0.3161	11.8678	11.5536	1.0291	0.5502	0.044	96.8534		7.26931	0.0873243	0.963247	0	0	0	0.0387523	1.70626	0	3.03634	1.92257	0	0.177789	0.098062	0	0	0	0	0	15.2997	7.21314	0.786861	0	8	0.168943	0.0866494	0	0	0.352729	0	3.01288	1.34035	0.0384529
GIC6		Basalt dyke	B GIC6B1_3		45.5289	1.9604	8.1547	15.5705	0.3429	11.7129	11.5951	1.0875	0.7864	0.0945	97.6428		6.84336	0.284807	1.41766	0	0.00520001	0	0.0400193	1.87262	0	2.64485	1.85032	0	0.298245	0.104915	0	0	0	0	0	15.362	6.7867	1.2133	0	8	0.192624	0.282449	0	0.00515696	0.377644	0	2.62296	1.47948	0.039688
GIC6		Basalt dyke	B GIC6B1_4		48.5833	1.4761	5.7126	14.5769	0.4438	13.5978	11.3581	1.0717	0.5135	0	97.3723		6.83152	0.221242	1.44201	0	0.01121	0	0.0435749	1.9536	0	2.62011	1.86392	0	0.31635	0.150516	0	0	0	0	0	15.4541	6.76735	1.23265	0	8	0.195816	0.219163	0	0.0111047	0.428043	0	2.5955	1.50721	0.0431656
GIC6		Basalt dyke	B GIC6B1_5		45.0743	2.2971	8.2408	15.5725	0.3111	12.3459	11.0269	1.6354	0.6773	0.0532	97.5807		7.13942	0.163149	0.989327	0	0	0	0.0552334	1.7912	0	2.97899	1.78815	0	0.305322	0.0962555	0	0	0	0.190518	0.00249052	15.5001	7.07556	0.924436	0	8	0.0560427	0.161689	0	0	0.597328	0	2.95235	1.17785	0.0547394
GIC6		Basalt dyke	B GIC6B2_1		52.5865	0.0682	3.3604	11.6338	0.2597	15.3269	12.1307	0.4105	0.1364	0	95.9397		6.74256	0.258445	1.45276	0	0.00629147	0	0.0394126	1.94786	0	2.75324	1.76714	0	0.474273	0.129237	0	0	0	0	0	15.5712	6.64011	1.35989	0	8	0.070806	0.254518	0	0.00619588	0.688306	0	2.7114	1.22996	0.0388137
GIC6		Basalt dyke	B GIC6B2_2		53.2478	0.0885	2.6787	12.4054	0.2794	16.0074	12.2219	0.3785	0.1825	0.0052	98.5469		7.57903	0.00739291	0.570769	0	0	0	0.0316993	1.40205	0	3.2932	1.87304	0	0.114699	0.0250763	0	0	0	0.59246	0.00977042	15.4992	7.64718	0.35282	0	8	0.223081	0.00745939	0	0	0.195767	0	3.32282	1.21889	0.0319844
GIC6		Basalt dyke	B GIC6B2_3		53.5607	0.1007	2.6795	12.6895	0.2807	15.7741	12.2293	0.3087	0.179	0.0069	98.2742		7.68217	0.00960323	0.455445	0	0.000593103	0	0.0341387	1.49657	0	3.44293	1.88905	0	0.105866	0.0335857	0	0	0	0	0	15.1499	7.61107	0.388932	0	8	0.0622979	0.00951435	0	0.000587614	0.42179	0	3.41106	1.06093	0.0338228
GIC6		Basalt dyke	B GIC6B2_4		52.8057	0.1266	2.742	12.6329	0.3125	15.9175	12.3486	0.2551	0.2059	0.0052	97.3521		7.70428	0.0108945	0.454224	0	0.000784657	0	0.0341954	1.52628	0	3.38264	1.88456	0	0.0860857	0.0328434	0	0	0	0	0	15.1168	7.63772	0.362281	0	8	0.0880186	0.0108004	0	0.000777878	0.393997	0	3.35341	1.11909	0.0338999
GIC6		Basalt dyke	B GIC6B2_5		51.1121	0.2354	4.3804	12.24	0.2266	15.6184	11.1872	0.2546	1.0142	0.032	96.8999		7.56581	0.0136427	0.46299	0	0.00058901	0	0.0379196	1.51349	0	3.39996	1.89546	0	0.0708587	0.0376305	0	0	0	0.489299	0	15.4877	7.56906	0.430936	0	8	0.032254	0.0136486	0	0.000589264	0.469914	0	3.40143	1.04423	0.0379359
1401L		Hornitos pluton	B 1401LA2_1		43.6425	1.4024	7.70269	27.5371	0.4462	6.0553	10.0228	1.9517	1.0439	0	99.8046		6.74864	0.163106	1.40372	0	0	0	0.0584352	3.56064	0	1.39594	1.66042	0	0.585097	0.205909	0	0	0	0	0	15.7819	6.58133	1.36892	0.0497511	8	0	0.109312	0	0	1.11212	0	1.36133	2.36025	0.0569866
1401L		Hornitos pluton	B 1401LA2_2		43.6356	1.4392	7.70392	27.381	0.4491	6.2884	10.0849	2.0891	1.0077	0	100.079		6.72768	0.166893	1.3998	0	0	0	0.0586416	3.53002	0	1.4454	1.66578	0	0.624442	0.198182	0	0	0	0	0	15.8168	6.5619	1.36531	0.0727959	8	0	0.0899843	0	0	1.10559	0	1.40979	2.33744	0.0571966
1401L		Hornitos pluton	B 1401LA2_3		43.9189	1.453	7.45146	27.0997	0.4913	6.2803	10.1248	1.9981	1.0421	0	99.8597		6.77563	0.168599	1.35478	0	0	0	0.0641924	3.49596	0	1.44445	1.67343	0	0.597618	0.205077	0	0	0	0	0	15.7797	6.621	1.32386	0.0551405	8	0	0.109611	0	0	1.02584	0	1.41149	2.39034	0.0627274
1401L		Hornitos pluton	B 1401LA2_4		43.155	1.4784	7.69899	27.4595	0.4811	6.2535	9.8707	1.958	1.0703	0	99.4255		6.70694	0.172813	1.41012	0	0	0	0.0633239	3.56853	0	1.44891	1.64348	0	0.589949	0.212182	0	0	0	0	0	15.8162	6.52102	1.37103	0.107947	8	0	0.0600759	0	0	1.2398	0	1.40875	2.22981	0.0615685
1401L		Hornitos pluton	B 1401LA2_5		43.1582	1.4787	7.40796	27.6558	0.4491	6.4865	9.6761	1.933	1.0846	0.0023	99.3323		6.71852	0.173134	1.35906	0	0.000283063	0	0.0592096	3.59998	0	1.50538	1.61374	0	0.583378	0.215372	0	0	0	0	0	15.8281	6.5104	1.31696	0.167771	7.99514	0	0	0	0.000274295	1.38077	0	1.45875	2.1077	0.052512
1401L		Hornitos pluton	B 1401LA2_6		43.2413	1.2943	7.6233	27.582	0.4593	6.4265	9.927	2.0049	1.0776	0	99.6362		6.71064	0.151075	1.39424	0	0	0	0.0603671	3.57927	0	1.48684	1.65046	0	0.603207	0.21332	0	0	0	0	0	15.8494	6.51887	1.3544	0.126731	8	0	0.0200269	0	0	1.27699	0	1.44435	2.19998	0.058642
1401L		Hornitos pluton	B 1401LA2_7		43.2725	1.4108	7.78671	26.9568	0.4337	6.3528	10.2528	2.0043	1.08	0.0141	99.5645		6.70468	0.164408	1.42184	0	0.00172715	0	0.0569107	3.4925	0	1.46743	1.70189	0	0.602056	0.213451	0	0	0	0	0	15.8269	6.54877	1.38877	0.062453	8	0	0.0981321	0	0.00168699	1.04478	0	1.4333	2.36651	0.0555874
1401L		Hornitos pluton	B 1401LA2_8		43.0995	1.4102	7.62206	27.1282	0.46	6.2533	10.1909	1.8581	1.082	0.0133	99.1176		6.71535	0.16526	1.39958	0	0.0016383	0	0.0607006	3.53444	0	1.45255	1.7011	0	0.561272	0.215047	0	0	0	0	0	15.8069	6.54934	1.36499	0.085676	8	0	0.0754991	0	0.0015978	1.10905	0	1.41664	2.33802	0.0592
1401L		Hornitos pluton	B 1401LA3_1		42.5786	1.3	7.71894	28.1888	0.7055	5.6604	9.8376	1.9454	1.0763	0	99.0115		6.68576	0.153531	1.42839	0	0	0	0.09382	3.70117	0	1.32505	1.6549	0	0.592211	0.215577	0	0	0	0	0	15.8504	6.49214	1.38702	0.12084	8	0	0.0282441	0	0	1.29362	0	1.28667	2.30036	0.0911029
1401L		Hornitos pluton	B 1401LA3_2		42.9856	1.4337	7.79545	27.8327	0.6565	6.0271	9.8241	1.9265	1.015	0.0227	99.5193		6.68971	0.167816	1.42974	0	0.0027929	0	0.0865283	3.62195	0	1.39836	1.63794	0	0.581248	0.201493	0	0	0	0	0	15.8176	6.49153	1.38738	0.121097	8	0	0.0417483	0	0.00271016	1.32241	0	1.35693	2.19224	0.0839648
1401L		Hornitos pluton	B 1401LA3_3		43.1235	1.5355	7.57887	27.2949	0.4661	6.2291	10.0178	1.921	1.0294	0	99.1961		6.71478	0.179829	1.39076	0	0	0	0.0614661	3.55387	0	1.446	1.67114	0	0.5799	0.204461	0	0	0	0	0	15.8022	6.54035	1.35463	0.105017	8	0	0.0701402	0	0	1.16388	0	1.40844	2.29768	0.0598694
1401L		Hornitos pluton	B 1401LA3_4		42.7306	1.5257	7.6631	27.1763	0.6193	6.1514	9.7598	1.7667	1.0157	0	98.4086		6.70679	0.18011	1.41746	0	0	0	0.082322	3.56673	0	1.43938	1.64111	0	0.537585	0.203353	0	0	0	0	0	15.7748	6.51009	1.37589	0.11402	8	0	0.0608069	0	0	1.30953	0	1.39716	2.15259	0.0799076
1401L		Hornitos pluton	B 1401LA3_5		43.1012	1.3207	7.8951	26.7037	0.5033	6.7198	10.264	1.7724	1.1704	0	99.4506		6.68101	0.153975	1.44225	0	0	0	0.0660722	3.46121	0	1.55287	1.70448	0	0.532627	0.231418	0	0	0	0	0	15.8259	6.50226	1.40366	0.0940813	8	0	0.0557736	0	0	1.19783	0	1.51132	2.17077	0.0643044
1401L		Hornitos pluton	B 1401LA1_1		43.5525	1.4147	7.9425	26.9871	0.4652	6.3464	10.0429	2.1227	1.1084	0	99.9824		6.71301	0.164006	1.44275	0	0	0	0.0607271	3.47828	0	1.45833	1.65838	0	0.634309	0.217926	0	0	0	0	0	15.8277	6.55316	1.4084	0.0384412	8	0	0.12166	0	0	1.06926	0	1.42361	2.32619	0.0592811
1401L		Hornitos pluton	B 1401LA1_2		43.4825	1.5062	7.83298	26.453	0.4034	6.329	10.1673	2.0146	1.1308	0.0023	99.3221		6.73269	0.175408	1.42933	0	0.000281544	0	0.0528992	3.42494	0	1.46095	1.68656	0	0.604744	0.223341	0	0	0	0	0	15.7911	6.59248	1.39956	0.00796104	8	0	0.163794	0	0.000275681	0.938034	0	1.43052	2.41558	0.0517975
1401L		Hornitos pluton	B 1401LA1_3		43.1631	1.5263	7.94569	26.8001	0.4298	6.2804	10.2274	2.0371	1.1038	0	99.5137		6.68787	0.177872	1.4509	0	0	0	0.0564002	3.47229	0	1.45073	1.69771	0	0.611922	0.21816	0	0	0	0	0	15.8238	6.53895	1.41859	0.0424542	8	0	0.131457	0	0	1.00147	0	1.41843	2.3935	0.0551443
1401L		Hornitos pluton	B 1401LA1_4		43.2491	1.525	7.83658	27.1917	0.4405	6.1583	10.1707	2.1553	1.0752	0.0148	99.8172		6.69287	0.177499	1.4292	0	0.00181068	0	0.0577324	3.51864	0	1.42076	1.6862	0	0.646623	0.212243	0	0	0	0	0	15.8436	6.54264	1.39712	0.0602476	8	0	0.113268	0	0.00177004	1.00935	0	1.38887	2.4303	0.0564365
1401L		Hornitos pluton	B 1401LA1_5		43.0367	1.4946	7.9351	26.9392	0.4031	6.3411	10.1688	2.0147	1.0581	0.007	99.3984		6.6791	0.17446	1.45131	0	0.00085886	0	0.0529823	3.49596	0	1.46713	1.69072	0	0.606175	0.209467	0	0	0	0	0	15.8282	6.51776	1.41626	0.0659872	8	0	0.104258	0	0.000838112	1.08437	0	1.43169	2.32714	0.0517024
1401L		Hornitos pluton	B 1401LA1_6		42.8002	1.4178	7.73704	27.0233	0.4548	6.2513	10.0364	2.0659	1.1284	0.0008	98.916		6.68812	0.166635	1.42483	0	9.8831e-05	0	0.0601891	3.53102	0	1.45631	1.68019	0	0.625858	0.224921	0	0	0	0	0	15.8582	6.52392	1.38985	0.0862342	8	0	0.0763093	0	9.64046e-05	1.10164	0	1.42055	2.34269	0.0587113
Amphibole formula calculations after Esawi, 2004
[truncated: 19 more columns]

## Sheet: EMPA Feldspar
Table S3d: Electron microprobe data of feldpsar
sample	rock type	unit	spot	point nr.			SiO2	TiO2	Al2O3	FeO	MnO	MgO	CaO	Na2O	K2O	Cr2O3		Total		Si	Al	Ti	Fe	Mn	Mg	Zn		Ca	Na	K		Total			An	Ab	Or		An#
BR GIC 10A	segregation	felsic segregation in upper gabbro	Line 1 GIC10Afsp1	141			62.03	0	23.56		0	0	4.52	8.77	0.24	0.04		99.17		2.77	1.24	0	0	0	0	0		0.22	0.76	0.01		5			21.87	76.73	1.4		0.219
BR GIC 10A	segregation	felsic segregation in upper gabbro	Line 2 GIC10Afsp1	142			62.36	0	23.92		0.03	0.03	4.56	8.65	0.28	0.11		99.94		2.76	1.25	0	0	0	0	0		0.22	0.74	0.02		4.99			22.19	76.17	1.63		0.222
BR GIC 10A	segregation	felsic segregation in upper gabbro	Line 3 GIC10Afsp1	143			61.74	0.04	23.6		0	0	4.69	8.63	0.45	0.08		99.24		2.76	1.24	0	0	0	0	0		0.22	0.75	0.03		5			22.48	74.94	2.58		0.225
BR GIC 10A	segregation	felsic segregation in upper gabbro	Line 4 GIC10Afsp1	144			61.46	0	23.65	0.01	0	0	4.82	8.61	0.54	0.17		99.24		2.75	1.25	0	0.01	0	0	0		0.23	0.75	0.03		5.01			22.9	74.07	3.03		0.229
BR GIC 10A	segregation	felsic segregation in upper gabbro	Line 5 GIC10Afsp1	145			61.46	0	23.71	0.01	0	0	4.7	8.45	0.59	0.17		99.09		2.75	1.25	0	0.01	0	0	0		0.23	0.73	0.03		5			22.7	73.9	3.4		0.227
BR GIC 10A	segregation	felsic segregation in upper gabbro	Line 6 GIC10Afsp1	146			61.21	0	23.55		0	0.02	4.66	8.47	0.56	0.17		98.64		2.75	1.25	0	0.01	0	0	0		0.22	0.74	0.03		5.01			22.57	74.22	3.21		0.226
BR GIC 10A	segregation	felsic segregation in upper gabbro	Line 7 GIC10Afsp1	147			61.61	0	23.62		0	0	4.73	8.55	0.58	0.19		99.27		2.76	1.25	0	0.01	0	0	0		0.23	0.74	0.03		5.01			22.63	74.08	3.29		0.226
BR GIC 10A	segregation	felsic segregation in upper gabbro	Line 8 GIC10Afsp1	148			61.4	0.02	23.47		0	0	4.67	8.46	0.56	0.18		98.76		2.76	1.24	0	0.01	0	0	0		0.22	0.74	0.03		5			22.62	74.13	3.25		0.226
BR GIC 10A	segregation	felsic segregation in upper gabbro	Line 9 GIC10Afsp1	149			61.8	0.01	23.49	0.05	0	0.01	4.62	8.59	0.56	0.21		99.35		2.76	1.24	0	0.01	0	0	0		0.22	0.74	0.03		5.01			22.18	74.62	3.2		0.222
BR GIC 10A	segregation	felsic segregation in upper gabbro	Line 10 GIC10Afsp1	150			61.18	0	23.68	0.01	0.02	0.01	4.72	8.43	0.59	0.13		98.77		2.75	1.25	0	0	0	0	0		0.23	0.74	0.03		5.01			22.8	73.79	3.41		0.228
BR GIC 10A	segregation	felsic segregation in upper gabbro	Line 11 GIC10Afsp1	151			61.34	0.04	23.72		0	0.02	4.77	8.54	0.57	0.19		99.19		2.75	1.25	0	0.01	0	0	0		0.23	0.74	0.03		5.01			22.81	73.94	3.25		0.228
BR GIC 10A	segregation	felsic segregation in upper gabbro	Line 12 GIC10Afsp1	152			61.07	0	23.71		0	0	4.96	8.34	0.56	0.21		98.85		2.75	1.26	0	0.01	0	0	0		0.24	0.73	0.03		5.01			23.96	72.82	3.22		0.24
BR GIC 10A	segregation	felsic segregation in upper gabbro	Line 13 GIC10Afsp1	153			61.27	0	23.86		0.01	0	5.02	8.52	0.52	0.16		99.35		2.74	1.26	0	0.01	0	0	0		0.24	0.74	0.03		5.01			23.83	73.25	2.92		0.238
BR GIC 10A	segregation	felsic segregation in upper gabbro	Line 14 GIC10Afsp1	154			61.22	0.01	24.13	0.09	0	0	5.2	8.33	0.55	0.17		99.69		2.73	1.27	0	0.01	0	0	0		0.25	0.72	0.03		5.01			24.85	72.03	3.12		0.248
BR GIC 10A	segregation	felsic segregation in upper gabbro	Line 15 GIC10Afsp1	155			61.12	0.02	24.01	0.04	0.04	0	5.01	8.43	0.49	0.14		99.31		2.74	1.27	0	0.01	0	0	0		0.24	0.73	0.03		5.01			24.02	73.17	2.8		0.24
BR GIC 10A	segregation	felsic segregation in upper gabbro	Line 16 GIC10Afsp1	156			60.87	0	24.07		0	0.02	5.33	8.37	0.49	0.16		99.31		2.73	1.27	0	0.01	0	0	0		0.26	0.73	0.03		5.02			25.3	71.92	2.78		0.253
BR GIC 10A	segregation	felsic segregation in upper gabbro	Line 17 GIC10Afsp1	157			60.71	0	23.92		0	0	5.38	8.28	0.62	0.14		99.05		2.73	1.27	0	0.01	0	0	0		0.26	0.72	0.04		5.02			25.48	71.03	3.49		0.255
BR GIC 10A	segregation	felsic segregation in upper gabbro	Line 18 GIC10Afsp1	158			61.1	0.06	23.98		0.02	0	5.19	8.28	0.54	0.15		99.32		2.73	1.26	0	0.01	0	0	0		0.25	0.72	0.03		5.01			24.95	71.95	3.1		0.249
BR GIC 10A	segregation	felsic segregation in upper gabbro	Line 19 GIC10Afsp1	159			61.13	0.05	23.87		0	0	5.22	8.32	0.58	0.1		99.27		2.74	1.26	0	0	0	0	0		0.25	0.72	0.03		5.01			24.91	71.78	3.31		0.249
BR GIC 10A	segregation	felsic segregation in upper gabbro	Line 20 GIC10Afsp1	160			60.49	0	23.85		0.03	0	5.12	8.23	0.56	0.17		98.43		2.73	1.27	0	0.01	0	0	0		0.25	0.72	0.03		5.01			24.76	72.02	3.22		0.248
BR GIC 10A	segregation	felsic segregation in upper gabbro	Line 21 GIC10Afsp1	161			61.27	0	23.91	0	0.02	0.02	4.8	8.71	0.39	0.12		99.23		2.74	1.26	0	0	0	0	0		0.23	0.76	0.02		5.02			22.83	74.97	2.21		0.228
BR GIC 10A	segregation	felsic segregation in upper gabbro	Line 22 GIC10Afsp1	162			60.77	0.01	23.71	0.07	0	0.02	4.71	8.79	0.37	0.13		98.58		2.74	1.26	0	0	0	0	0		0.23	0.77	0.02		5.02			22.37	75.56	2.06		0.224
BR GIC 10A	segregation	felsic segregation in upper gabbro	Line 23 GIC10Afsp1	163			61.8	0.01	23.49		0.03	0.03	4.53	8.72	0.43	0.1		99.14		2.76	1.24	0	0	0	0	0		0.22	0.76	0.02		5.01			21.77	75.8	2.43		0.218
BR GIC 10A	segregation	felsic segregation in upper gabbro	Line 24 GIC10Afsp1	164			61.44	0.03	23.45	0	0	0	4.76	8.68	0.43	0.12		98.91		2.76	1.24	0	0	0	0	0		0.23	0.76	0.02		5.01			22.7	74.89	2.41		0.227
BR GIC 10A	segregation	felsic segregation in upper gabbro	Line 25 GIC10Afsp1	165			61.97	0	24.36	0.09	0.02	0	4.96	8.74	0.35	0.11		100.61		2.74	1.27	0	0	0	0	0		0.23	0.75	0.02		5.01			23.38	74.64	1.98		0.234
BR GIC 10A	segregation	felsic segregation in upper gabbro	Line 26 GIC10Afsp1	166			62.03	0.01	24.03		0.04	0.03	4.88	8.61	0.58	0.18		100.38		2.75	1.25	0	0.01	0	0	0		0.23	0.74	0.03		5.01			23.07	73.67	3.26		0.231
BR GIC 10A	segregation	felsic segregation in upper gabbro	Line 27 GIC10Afsp1	167			61.93	0.03	24.51		0	0.02	5.18	8.56	0.46	0.16		100.85		2.73	1.27	0	0.01	0	0	0		0.24	0.73	0.03		5.01			24.41	72.99	2.6		0.244
BR GIC 10A	segregation	felsic segregation in upper gabbro	Line 28 GIC10Afsp1	168			61.62	0	24.02		0.02	0	5.12	8.47	0.55	0.11		99.92		2.74	1.26	0	0	0	0	0		0.24	0.73	0.03		5.01			24.28	72.65	3.07		0.243
BR GIC 10A	segregation	felsic segregation in upper gabbro	Line 29 GIC10Afsp1	169			60.74	0.01	23.84		0.03	0	5.15	8.13	0.68	0.2		98.78		2.74	1.27	0	0.01	0	0	0		0.25	0.71	0.04		5.01			24.92	71.16	3.92		0.249
BR GIC 10A	segregation	felsic segregation in upper gabbro	Line 30 GIC10Afsp1	170			60.38	0.01	23.78	0.04	0	0	5.3	8.24	0.45	0.19		98.38		2.73	1.27	0	0.01	0	0	0		0.26	0.72	0.03		5.01			25.54	71.87	2.59		0.255
BR GIC 10A	segregation	felsic segregation in upper gabbro	Line 31 GIC10Afsp1	171			60.68	0	24.25		0	0	5.35	8.2	0.5	0.19		99.18		2.72	1.28	0	0.01	0	0	0		0.26	0.71	0.03		5.01			25.75	71.4	2.85		0.257
BR GIC 10A	segregation	felsic segregation in upper gabbro	Line 32 GIC10Afsp1	172			58.99	0.03	24.14		0.03	0	5.5	8.14	0.49	0.16		97.48		2.7	1.3	0	0.01	0	0	0		0.27	0.72	0.03		5.03			26.42	70.75	2.83		0.264
BR GIC 10A	segregation	felsic segregation in upper gabbro	Line 33 GIC10Afsp1	173			60.02	0	24.4	0.03	0.02	0	5.62	7.99	0.44	0.1		98.62		2.71	1.3	0	0	0	0	0		0.27	0.7	0.03		5.01			27.27	70.17	2.56		0.273
BR GIC 10A	segregation	felsic segregation in upper gabbro	Line 34 GIC10Afsp1	174			59.95	0	24.7		0.02	0.01	5.75	8	0.49	0.09		99.02		2.7	1.31	0	0	0	0	0		0.28	0.7	0.03		5.01			27.62	69.56	2.82		0.276
BR GIC 10A	segregation	felsic segregation in upper gabbro	Line 35 GIC10Afsp1	175			60.38	0	24.6	0.01	0	0.01	5.88	7.96	0.44	0.13		99.4		2.7	1.3	0	0.01	0	0	0		0.28	0.69	0.03		5.01			28.28	69.21	2.51		0.283
BR GIC 10A	segregation	felsic segregation in upper gabbro	Line 36 GIC10Afsp1	176			59.73	0	24.81		0.01	0	6	7.8	0.42	0.2		98.96		2.69	1.32	0	0.01	0	0	0		0.29	0.68	0.02		5.01			29.11	68.49	2.4		0.291
BR GIC 10A	segregation	felsic segregation in upper gabbro	Line 37 GIC10Afsp1	177			59.16	0	24.87	0.03	0	0.01	6.17	7.77	0.45	0.12		98.58		2.68	1.33	0	0	0	0	0		0.3	0.68	0.03		5.01			29.73	67.69	2.58		0.297
BR GIC 10A	segregation	felsic segregation in upper gabbro	Line 38 GIC10Afsp1	178			59.06	0	24.7		0	0.01	6.27	7.58	0.44	0.19		98.26		2.68	1.32	0	0.01	0	0	0		0.31	0.67	0.03		5.01			30.57	66.86	2.56		0.306
BR GIC 10A	segregation	felsic segregation in upper gabbro	Line 39 GIC10Afsp1	179			59.27	0.04	24.86		0	0.01	6.3	7.71	0.43	0.21		98.83		2.68	1.32	0	0.01	0	0	0		0.3	0.67	0.02		5.01			30.35	67.16	2.49		0.304
BR GIC 10A	segregation	felsic segregation in upper gabbro	Line 40 GIC10Afsp1	180			58.95	0.02	24.79	0.05	0	0	6.22	7.74	0.47	0.2		98.44		2.67	1.33	0	0.01	0	0	0		0.3	0.68	0.03		5.02			29.91	67.38	2.7		0.299
BR GIC 10A	segregation	felsic segregation in upper gabbro	Line 41 GIC10Afsp1	181			58.97	0.06	24.63	0.04	0	0	6.28	7.72	0.44	0.21		98.35		2.68	1.32	0	0.01	0	0	0		0.31	0.68	0.03		5.02			30.23	67.23	2.54		0.302
BR GIC 10A	segregation	felsic segregation in upper gabbro	Line 42 GIC10Afsp1	182			59.55	0.05	24.94	0.02	0	0	6.15	7.78	0.46	0.09		99.06		2.68	1.32	0	0	0	0	0		0.3	0.68	0.03		5.01			29.6	67.75	2.65		0.296
BR GIC 10A	segregation	felsic segregation in upper gabbro	Line 43 GIC10Afsp1	183			59.32	0	24.85		0	0.02	6.26	7.68	0.47	0.11		98.7		2.68	1.32	0	0	0	0	0		0.3	0.67	0.03		5.01			30.23	67.09	2.68		0.302
BR GIC 10A	segregation	felsic segregation in upper gabbro	Line 44 GIC10Afsp1	184			59.08	0.02	24.79		0.03	0	6.37	7.59	0.4	0.11		98.38		2.68	1.32	0	0	0	0	0		0.31	0.67	0.02		5.01			30.96	66.75	2.29		0.31
BR GIC 10A	segregation	felsic segregation in upper gabbro	Line 45 GIC10Afsp1	185			59	0	24.87	0.01	0.03	0	6.41	7.7	0.44	0.19		98.64		2.67	1.33	0	0.01	0	0	0		0.31	0.68	0.03		5.02			30.71	66.79	2.5		0.307
BR GIC 10A	segregation	felsic segregation in upper gabbro	Line 46 GIC10Afsp1	186			59.19	0.03	24.82		0	0	6.25	7.66	0.39	0.12		98.46		2.68	1.32	0	0	0	0	0		0.3	0.67	0.02		5.01			30.38	67.36	2.25		0.304
BR GIC 10A	segregation	felsic segregation in upper gabbro	Line 47 GIC10Afsp1	187			59.11	0.05	24.98		0.01	0	6.4	7.69	0.43	0.23		98.89		2.67	1.33	0	0.01	0	0	0		0.31	0.67	0.02		5.01			30.74	66.82	2.45		0.307
BR GIC 10A	segregation	felsic segregation in upper gabbro	Line 48 GIC10Afsp1	188			59.23	0.02	24.88		0	0.02	6.51	7.63	0.4	0.24		98.92		2.67	1.32	0	0.01	0	0	0		0.31	0.67	0.02		5.01			31.32	66.38	2.29		0.313
BR GIC 10A	segregation	felsic segregation in upper gabbro	Line 49 GIC10Afsp1	189			59.21	0.03	24.89	0.02	0.01	0	6.44	7.65	0.46	0.2		98.9		2.67	1.32	0	0.01	0	0	0		0.31	0.67	0.03		5.01			30.92	66.47	2.61		0.309
BR GIC 10A	segregation	felsic segregation in upper gabbro	Line 50 GIC10Afsp1	190			59.37	0	24.94		0	0	6.36	7.74	0.49	0.2		99.09		2.67	1.32	0	0.01	0	0	0		0.31	0.68	0.03		5.02			30.37	66.86	2.77		0.304
BR GIC 10A	segregation	felsic segregation in upper gabbro	Line 51 GIC10Afsp1	191			58.87	0	25.21	0.03	0	0	6.45	7.45	0.4	0.18		98.6		2.66	1.34	0	0.01	0	0	0		0.31	0.65	0.02		5			31.59	66.07	2.34		0.316
BR GIC 10A	segregation	felsic segregation in upper gabbro	Line 52 GIC10Afsp1	192			58.56	0.04	25.05		0	0.01	6.55	7.43	0.46	0.22		98.31		2.66	1.34	0	0.01	0	0	0		0.32	0.65	0.03		5.01			31.91	65.43	2.67		0.319
BR GIC 10A	segregation	felsic segregation in upper gabbro	Line 53 GIC10Afsp1	193			59.19	0.04	24.97		0.03	0	6.54	7.63	0.39	0.21		99.02		2.67	1.33	0	0.01	0	0	0		0.32	0.67	0.02		5.01			31.42	66.33	2.25		0.314
BR GIC 10A	segregation	felsic segregation in upper gabbro	Line 54 GIC10Afsp1	194			58.68	0.03	24.85	0.03	0.01	0	6.5	7.76	0.55	0.25		98.66		2.66	1.33	0	0.01	0	0	0		0.32	0.68	0.03		5.03			30.65	66.24	3.11		0.307
BR GIC 10A	segregation	felsic segregation in upper gabbro	Line 55 GIC10Afsp1	195			58.95	0.06	25.26	0.01	0	0	6.61	7.48	0.39	0.21		98.96		2.66	1.34	0	0.01	0	0	0		0.32	0.65	0.02		5.01			32.09	65.68	2.22		0.321
BR GIC 10A	segregation	felsic segregation in upper gabbro	Line 56 GIC10Afsp1	196			59.31	0.06	25.04	0.01	0	0	6.48	7.48	0.52	0.17		99.08		2.67	1.33	0	0.01	0	0	0		0.31	0.65	0.03		5			31.37	65.6	3.02		0.314
BR GIC 10A	segregation	felsic segregation in upper gabbro	Line 57 GIC10Afsp1	197			59.18	0	25.2	0	0	0	6.55	7.64	0.39	0.17		99.12		2.66	1.34	0	0.01	0	0	0		0.32	0.67	0.02		5.01			31.42	66.33	2.25		0.314
BR GIC 10A	segregation	felsic segregation in upper gabbro	Line 58 GIC10Afsp1	198			59.08	0	25.13		0	0	6.51	7.45	0.4	0.13		98.68		2.67	1.34	0	0	0	0	0		0.31	0.65	0.02		5			31.79	65.9	2.3		0.318
BR GIC 10A	segregation	felsic segregation in upper gabbro	Line 59 GIC10Afsp1	199			58.84	0.05	25.01		0.05	0	6.54	7.43	0.37	0.11		98.4		2.67	1.34	0	0	0	0	0		0.32	0.65	0.02		5			32.02	65.81	2.17		0.32
BR GIC 10A	segregation	felsic segregation in upper gabbro	Line 60 GIC10Afsp1	200			58.7	0.06	25.13		0	0	6.68	7.41	0.37	0.21		98.54		2.66	1.34	0	0.01	0	0	0		0.32	0.65	0.02		5			32.55	65.3	2.15		0.326
BR GIC 10A	segregation	felsic segregation in upper gabbro	Line 61 GIC10Afsp1	201			59.16	0.01	25.01	0.03	0	0	6.69	7.56	0.43	0.21		99.1		2.67	1.33	0	0.01	0	0	0		0.32	0.66	0.02		5.01			32.03	65.5	2.47		0.32
BR GIC 10A	segregation	felsic segregation in upper gabbro	Line 62 GIC10Afsp1	202			58.74	0	25.12	0.03	0	0	6.59	7.42	0.43	0.21		98.54		2.66	1.34	0	0.01	0	0	0		0.32	0.65	0.03		5.01			32.09	65.39	2.51		0.321
BR GIC 10A	segregation	felsic segregation in upper gabbro	Line 63 GIC10Afsp1	203			59.03	0	25.25		0.02	0	6.76	7.49	0.36	0.15		99.07		2.66	1.34	0	0.01	0	0	0		0.33	0.65	0.02		5.01			32.61	65.35	2.05		0.326
BR GIC 10A	segregation	felsic segregation in upper gabbro	Line 64 GIC10Afsp1	204			58.93	0	25.33	0.02	0	0.01	6.77	7.46	0.38	0.09		98.99		2.66	1.35	0	0	0	0	0		0.33	0.65	0.02		5.01			32.66	65.15	2.19		0.327
BR GIC 10A	segregation	felsic segregation in upper gabbro	Line 65 GIC10Afsp1	205			58.82	0.02	25.16		0	0.01	6.71	7.37	0.4	0.1		98.58		2.66	1.34	0	0	0	0	0		0.33	0.65	0.02		5			32.72	64.99	2.29		0.327
BR GIC 10A	segregation	felsic segregation in upper gabbro	Line 66 GIC10Afsp1	206			58.93	0.02	25.2		0	0	6.65	7.53	0.4	0.16		98.89		2.66	1.34	0	0.01	0	0	0		0.32	0.66	0.02		5.01			32.03	65.67	2.3		0.32
BR GIC 10A	segregation	felsic segregation in upper gabbro	Line 67 GIC10Afsp1	207			58.36	0.01	25.33	0.02	0	0	6.75	7.46	0.41	0.19		98.52		2.65	1.35	0	0.01	0	0	0		0.33	0.66	0.02		5.02			32.55	65.12	2.32		0.326
BR GIC 10A	segregation	felsic segregation in upper gabbro	Line 68 GIC10Afsp1	208			59.03	0.01	25.46		0	0.01	6.85	7.42	0.37	0.14		99.28		2.65	1.35	0	0.01	0	0	0		0.33	0.65	0.02		5.01			33.04	64.83	2.13		0.33
BR GIC 10A	segregation	felsic segregation in upper gabbro	Line 69 GIC10Afsp1	209			59	0.05	25.54		0.01	0.01	6.85	7.55	0.36	0.13		99.5		2.65	1.35	0	0	0	0	0		0.33	0.66	0.02		5.01			32.69	65.25	2.07		0.327
BR GIC 10A	segregation	felsic segregation in upper gabbro	Line 70 GIC10Afsp1	210			58.95	0.01	25.37		0	0	6.91	7.41	0.45	0.13		99.24		2.65	1.35	0	0	0	0	0		0.33	0.65	0.03		5.01			33.14	64.29	2.57		0.331
BR GIC 10A	segregation	felsic segregation in upper gabbro	Line 71 GIC10Afsp1	211			58.22	0.02	25.24		0	0.01	6.82	7.44	0.32	0.12		98.19		2.65	1.35	0	0	0	0	0		0.33	0.66	0.02		5.01			33.01	65.17	1.82		0.33
BR GIC 10A	segregation	felsic segregation in upper gabbro	Line 72 GIC10Afsp1	212			59	0.01	25.52		0.02	0	6.84	7.45	0.34	0.1		99.27		2.65	1.35	0	0	0	0	0		0.33	0.65	0.02		5.01			33	65.07	1.93		0.33
BR GIC 10A	segregation	felsic segregation in upper gabbro	Line 73 GIC10Afsp1	213			61.22	0.02	23.75		0.01	0	4.8	8.59	0.4	0.1		98.89		2.75	1.26	0	0	0	0	0		0.23	0.75	0.02		5.01			23.04	74.66	2.3		0.23
BR GIC 10A	segregation	felsic segregation in upper gabbro	Line 74 GIC10Afsp1	214			61.28	0.06	23.82	0.02	0.02	0.01	4.78	8.72	0.3	0.12		99.12		2.74	1.26	0	0	0	0	0		0.23	0.76	0.02		5.01			22.85	75.47	1.68		0.229
BR GIC 10A	segregation	felsic segregation in upper gabbro	Line 75 GIC10Afsp1	215			96.51	0.05	0		0	0	0.02	0	0	0.02		96.6		4	0	0	0	0	0	0		0	0	0		4			100	0	0		1
BR GIC 10A	segregation	felsic segregation in upper gabbro	Line 76 GIC10Afsp1	216			60.79	0	24.04		0	0	5.14	8.53	0.25	0.06		98.8		2.73	1.27	0	0	0	0	0		0.25	0.74	0.01		5.01			24.64	73.96	1.4		0.246
BR GIC 10A	segregation	felsic segregation in upper gabbro	Line 77 GIC10Afsp1	217			61.92	0.03	23.25		0	0	4.55	8.64	0.4	0.16		98.94		2.77	1.23	0	0.01	0	0	0		0.22	0.75	0.02		5			22.02	75.67	2.32		0.22
BR GIC 10A	segregation	felsic segregation in upper gabbro	Line 78 GIC10Afsp1	218			61.56	0	23.94		0.01	0.01	5.17	8.44	0.5	0.12		99.77		2.74	1.26	0	0	0	0	0		0.25	0.73	0.03		5.01			24.57	72.58	2.85		0.246
BR GIC 10A	segregation	felsic segregation in upper gabbro	Line 79 GIC10Afsp1	219			58.93	0.04	25.51	0	0	0	6.79	7.49	0.31	0.15		99.21		2.65	1.35	0	0.01	0	0	0		0.33	0.65	0.02		5.01			32.76	65.44	1.8		0.328
BR GIC 10A	segregation	felsic segregation in upper gabbro	Line 80 GIC10Afsp1	220			58.9	0.06	25.69	0.02	0	0	7.05	7.49	0.24	0.13		99.58		2.64	1.36	0	0	0	0	0		0.34	0.65	0.01		5.01			33.77	64.87	1.37		0.338
BR GIC 10A	segregation	felsic segregation in upper gabbro	Line 81 GIC10Afsp1	221			58.36	0.02	25.34		0	0	6.96	7.3	0.33	0.08		98.39		2.65	1.36	0	0	0	0	0		0.34	0.64	0.02		5.01			33.85	64.24	1.91		0.338
BR GIC 10A	segregation	felsic segregation in upper gabbro	Line 82 GIC10Afsp1	222			58.72	0.05	25.41	0.03	0.02	0.02	6.83	7.39	0.43	0.13		99.01		2.65	1.35	0	0	0	0	0		0.33	0.65	0.02		5.01			32.99	64.56	2.45		0.33
BR GIC 10A	segregation	felsic segregation in upper gabbro	Line 83 GIC10Afsp1	223			58.54	0.02	25.59	0	0	0.01	6.86	7.37	0.42	0.1		98.91		2.64	1.36	0	0	0	0	0		0.33	0.65	0.02		5.01			33.12	64.45	2.43		0.331
BR GIC 10A	segregation	felsic segregation in upper gabbro	Line 84 GIC10Afsp1	224			58.41	0.01	25.38		0	0	6.98	7.35	0.45	0.09		98.66		2.64	1.35	0	0	0	0	0		0.34	0.65	0.03		5.01			33.53	63.93	2.55		0.335
BR GIC 10A	segregation	felsic segregation in upper gabbro	Line 85 GIC10Afsp1	225			58.97	0	25.63	0.02	0.01	0	6.91	7.54	0.32	0.13		99.54		2.65	1.36	0	0.01	0	0	0		0.33	0.66	0.02		5.01			32.98	65.18	1.84		0.33
BR GIC 10A	segregation	felsic segregation in upper gabbro	Line 86 GIC10Afsp1	226			58.27	0	25.59		0.02	0	6.98	7.39	0.39	0.2		98.84		2.64	1.36	0	0.01	0	0	0		0.34	0.65	0.02		5.02			33.53	64.22	2.25		0.335
BR GIC 10A	segregation	felsic segregation in upper gabbro	Line 87 GIC10Afsp1	227			58.54	0	25.38		0.01	0.03	7.01	7.28	0.35	0.16		98.75		2.65	1.35	0	0.01	0	0	0		0.34	0.64	0.02		5.01			34.02	63.95	2.03		0.34
BR GIC 10A	segregation	felsic segregation in upper gabbro	Line 88 GIC10Afsp1	228			58.7	0.03	25.54	0.02	0.01	0.01	7.14	7.33	0.38	0.19		99.33		2.64	1.35	0	0.01	0	0	0		0.34	0.64	0.02		5.01			34.24	63.61	2.15		0.342
BR GIC 10A	segregation	felsic segregation in upper gabbro	Line 89 GIC10Afsp1	229			59.01	0	25.39		0.01	0	6.84	7.53	0.38	0.12		99.28		2.65	1.35	0	0	0	0	0		0.33	0.66	0.02		5.01			32.7	65.14	2.17		0.327
BR GIC 10A	segregation	felsic segregation in upper gabbro	Line 90 GIC10Afsp1	230			59.18	0	25.65		0	0	6.87	7.45	0.33	0.08		99.55		2.65	1.35	0	0	0	0	0		0.33	0.65	0.02		5			33.12	64.99	1.89		0.331
BR GIC 10A	segregation	felsic segregation in upper gabbro	Line 91 GIC10Afsp1	231			59.12	0.05	25.52	0	0.02	0	6.82	7.52	0.42	0.06		99.53		2.65	1.35	0	0	0	0	0		0.33	0.65	0.02		5.01			32.6	65.02	2.37		0.326
BR GIC 10A	segregation	felsic segregation in upper gabbro	Line 92 GIC10Afsp1	232			58.97	0	25.5	0.01	0	0	6.88	7.42	0.42	0.17		99.36		2.65	1.35	0	0.01	0	0	0		0.33	0.65	0.02		5.01			33.09	64.53	2.39		0.331
BR GIC 10A	segregation	felsic segregation in upper gabbro	Line 93 GIC10Afsp1	233			58.94	0.05	25.56		0.03	0	6.9	7.47	0.37	0.15		99.47		2.65	1.35	0	0.01	0	0	0		0.33	0.65	0.02		5.01			33.07	64.81	2.12		0.331
BR GIC 10A	segregation	felsic segregation in upper gabbro	Line 94 GIC10Afsp1	234			59.09	0.02	25.65		0.04	0	6.93	7.36	0.38	0.09		99.55		2.65	1.36	0	0	0	0	0		0.33	0.64	0.02		5			33.49	64.31	2.2		0.335
BR GIC 10A	segregation	felsic segregation in upper gabbro	Line 95 GIC10Afsp1	235			58.71	0.01	25.42		0.01	0	6.84	7.48	0.4	0.15		99.02		2.65	1.35	0	0.01	0	0	0		0.33	0.65	0.02		5.01			32.79	64.93	2.28		0.328
BR GIC 10A	segregation	felsic segregation in upper gabbro	Line 96 GIC10Afsp1	236			58.4	0	25.51	0	0	0	6.89	7.37	0.45	0.16		98.79		2.64	1.36	0	0.01	0	0	0		0.33	0.65	0.03		5.01			33.19	64.22	2.59		0.332
BR GIC 10A	segregation	felsic segregation in upper gabbro	Line 97 GIC10Afsp1	237			58.45	0.01	25.58	0.03	0.01	0	6.92	7.21	0.38	0.13		98.71		2.64	1.36	0	0	0	0	0		0.34	0.63	0.02		5			33.89	63.92	2.19		0.339
BR GIC 10A	segregation	felsic segregation in upper gabbro	Line 98 GIC10Afsp1	238			58.58	0	25.39		0	0	6.93	7.4	0.4	0.11		98.82		2.65	1.35	0	0	0	0	0		0.34	0.65	0.02		5.01			33.32	64.39	2.29		0.333
BR GIC 10A	segregation	felsic segregation in upper gabbro	Line 99 GIC10Afsp1	239			58.78	0	25.61	0.01	0.01	0	6.83	7.38	0.35	0.09		99.06		2.65	1.36	0	0	0	0	0		0.33	0.64	0.02		5.01			33.13	64.85	2.02		0.331
BR GIC 10A	segregation	felsic segregation in upper gabbro	Line 100 GIC10Afsp1	240			58.35	0.06	25.45		0.01	0.01	6.9	7.21	0.46	0.16		98.61		2.64	1.36	0	0.01	0	0	0		0.33	0.63	0.03		5.01			33.65	63.66	2.7		0.336
BR GIC 10A	segregation	felsic segregation in upper gabbro	Line 101 GIC10Afsp1	241			58.62	0.01	25.36		0	0	6.9	7.26	0.37	0.16		98.67		2.65	1.35	0	0.01	0	0	0		0.33	0.64	0.02		5			33.72	64.15	2.13		0.337
BR GIC 10A	segregation	felsic segregation in upper gabbro	Line 102 GIC10Afsp1	242			58.64	0.01	25.6		0	0	6.77	7.23	0.38	0.14		98.77		2.65	1.36	0	0.01	0	0	0		0.33	0.63	0.02		5			33.35	64.41	2.24		0.333
BR GIC 10A	segregation	felsic segregation in upper gabbro	Line 103 GIC10Afsp1	243			58.86	0.03	25.44	0.05	0	0.01	7	7.42	0.42	0.22		99.44		2.65	1.35	0	0.01	0	0	0		0.34	0.65	0.02		5.01			33.47	64.15	2.37		0.335
BR GIC 10A	segregation	felsic segregation in upper gabbro	Line 104 GIC10Afsp1	244			58.57	0	25.63	0.03	0	0	6.96	7.23	0.43	0.15		98.99		2.64	1.36	0	0.01	0	0	0		0.34	0.63	0.02		5			33.87	63.64	2.49		0.339
BR GIC 10A	segregation	felsic segregation in upper gabbro	Line 105 GIC10Afsp1	245			58.36	0.04	25.48		0	0.02	6.98	7.35	0.4	0.16		98.78		2.64	1.36	0	0.01	0	0	0		0.34	0.64	0.02		5.01			33.62	64.09	2.28		0.336
BR GIC 10A	segregation	felsic segregation in upper gabbro	Line 106 GIC10Afsp1	246			58.76	0	25.59		0.01	0	7.06	7.25	0.43	0.14		99.24		2.64	1.36	0	0.01	0	0	0		0.34	0.63	0.02		5.01			34.12	63.43	2.45		0.341
BR GIC 10A	segregation	felsic segregation in upper gabbro	Line 107 GIC10Afsp1	247			57.96	0	25.49		0	0	7.01	7.36	0.38	0.19		98.39		2.63	1.37	0	0.01	0	0	0		0.34	0.65	0.02		5.02			33.75	64.09	2.17		0.337
BR GIC 10A	segregation	felsic segregation in upper gabbro	Line 108 GIC10Afsp1	248			58.34	0.03	25.67		0.02	0	7.07	7.3	0.35	0.15		98.94		2.63	1.37	0	0.01	0	0	0		0.34	0.64	0.02		5.01			34.15	63.81	2.04		0.342
BR GIC 10A	segregation	felsic segregation in upper gabbro	Line 109 GIC10Afsp1	249			58.38	0.03	25.77		0.01	0.02	7.17	7.33	0.41	0.13		99.26		2.63	1.37	0	0	0	0	0		0.35	0.64	0.02		5.02			34.27	63.39	2.34		0.343
BR GIC 10A	segregation	felsic segregation in upper gabbro	Line 110 GIC10Afsp1	250			58.59	0.02	25.72		0	0	7.27	7.1	0.38	0.14		99.22		2.64	1.36	0	0.01	0	0	0		0.35	0.62	0.02		5			35.35	62.46	2.19		0.353
BR GIC 10A	segregation	felsic segregation in upper gabbro	Line 111 GIC10Afsp1	251			58.74	0	25.85		0.02	0.02	7.16	7.17	0.37	0.12		99.45		2.64	1.37	0	0	0	0	0		0.34	0.62	0.02		5			34.79	63.06	2.16		0.348
BR GIC 10A	segregation	felsic segregation in upper gabbro	Line 112 GIC10Afsp1	252			58.8	0.03	25.89		0.01	0	7.2	7.08	0.43	0.12		99.57		2.64	1.37	0	0	0	0	0		0.35	0.62	0.02		5			35.07	62.43	2.5		0.351
BR GIC 10A	segregation	felsic segregation in upper gabbro	Line 113 GIC10Afsp1	253			58.42	0.05	25.86	0.01	0	0	7.2	7.23	0.38	0.15		99.3		2.63	1.37	0	0.01	0	0	0		0.35	0.63	0.02		5.01			34.73	63.12	2.15		0.347
BR GIC 10A	segregation	felsic segregation in upper gabbro	Line 114 GIC10Afsp1	254			58.58	0.02	25.77		0.03	0.01	7.26	7.06	0.39	0.22		99.33		2.64	1.37	0	0.01	0	0	0		0.35	0.62	0.02		5			35.42	62.31	2.27		0.354
BR GIC 10A	segregation	felsic segregation in upper gabbro	Line 115 GIC10Afsp1	255			58.66	0.01	25.88	0.01	0	0.01	7.26	7.18	0.42	0.18		99.59		2.63	1.37	0	0.01	0	0	0		0.35	0.62	0.02		5.01			34.99	62.61	2.39		0.35
BR GIC 10A	segregation	felsic segregation in upper gabbro	Line 116 GIC10Afsp1	256			58.44	0	25.84		0	0	7.13	7.18	0.44	0.21		99.23		2.63	1.37	0	0.01	0	0	0		0.34	0.63	0.02		5.01			34.56	62.93	2.51		0.346
BR GIC 10A	segregation	felsic segregation in upper gabbro	Line 117 GIC10Afsp1	257			57.95	0.01	25.64		0	0.02	7.14	7.31	0.38	0.08		98.52		2.63	1.37	0	0	0	0	0		0.35	0.64	0.02		5.02			34.29	63.54	2.16		0.343
BR GIC 10A	segregation	felsic segregation in upper gabbro	Line 118 GIC10Afsp1	258			58.22	0	25.65		0	0	7.34	7.15	0.43	0.17		98.96		2.63	1.37	0	0.01	0	0	0		0.36	0.63	0.02		5.01			35.31	62.23	2.46		0.353
BR GIC 10A	segregation	felsic segregation in upper gabbro	Line 119 GIC10Afsp1	259			58.25	0	25.7		0	0	7.24	7.12	0.43	0.14		98.88		2.63	1.37	0	0.01	0	0	0		0.35	0.62	0.02		5.01			35.07	62.44	2.49		0.351
BR GIC 10A	segregation	felsic segregation in upper gabbro	Line 120 GIC10Afsp1	260			58.62	0.01	25.86		0.01	0	7.22	7.3	0.39	0.15		99.57		2.63	1.37	0	0.01	0	0	0		0.35	0.64	0.02		5.01			34.55	63.22	2.22		0.346
BR GIC 10A	segregation	felsic segregation in upper gabbro	Line 121 GIC10Afsp1	261			58.52	0.05	25.57	0.03	0.03	0.02	7.08	7.16	0.39	0.16		99.02		2.64	1.36	0	0.01	0	0	0		0.34	0.63	0.02		5			34.53	63.21	2.26		0.345
BR GIC 10A	segregation	felsic segregation in upper gabbro	Line 122 GIC10Afsp1	262			57.98	0	25.75		0	0	7.18	7.29	0.44	0.12		98.76		2.63	1.37	0	0	0	0	0		0.35	0.64	0.03		5.02			34.39	63.12	2.49		0.344
BR GIC 10A	segregation	felsic segregation in upper gabbro	Line 123 GIC10Afsp1	263			58.16	0.04	25.63		0	0	7.23	7.22	0.37	0.19		98.83		2.63	1.37	0	0.01	0	0	0		0.35	0.63	0.02		5.01			34.9	63	2.1		0.349
BR GIC 10A	segregation	felsic segregation in upper gabbro	Line 124 GIC10Afsp1	264			57.96	0	25.8	0	0	0.02	7.22	7.32	0.31	0.09		98.72		2.62	1.38	0	0	0	0	0		0.35	0.64	0.02		5.02			34.67	63.57	1.76		0.347
BR GIC 10A	segregation	felsic segregation in upper gabbro	Line 125 GIC10Afsp1	265			59.58	0	24.73		0.01	0	6.06	8.05	0.32	0.12		98.87		2.69	1.31	0	0	0	0	0		0.29	0.7	0.02		5.02			28.84	69.34	1.82		0.288
BR GIC 10A	segregation	felsic segregation in upper gabbro	Line 126 GIC10Afsp1	266			59.66	0.02	24.81		0	0	6.1	7.84	0.27	0.11		98.81		2.69	1.32	0	0	0	0	0		0.29	0.68	0.02		5			29.6	68.87	1.54		0.296
BR GIC 10A	segregation	felsic segregation in upper gabbro	Line 127 GIC10Afsp1	267			58.16	0.01	25.84	0.01	0.02	0	7.15	7.43	0.36	0.1		99.07		2.63	1.37	0	0	0	0	0		0.35	0.65	0.02		5.02			34.03	63.95	2.02		0.34
BR GIC 10A	segregation	felsic segregation in upper gabbro	Line 128 GIC10Afsp1	268			58.13	0.02	25.65	0.01	0.03	0	7.1	7.11	0.37	0.15		98.57		2.63	1.37	0	0.01	0	0	0		0.34	0.62	0.02		5			34.81	63.05	2.13		0.348
BR GIC 10A	segregation	felsic segregation in upper gabbro	Line 129 GIC10Afsp1	269			58.03	0	25.76		0.02	0	7.17	7.24	0.42	0.19		98.81		2.63	1.37	0	0.01	0	0	0		0.35	0.64	0.02		5.02			34.55	63.06	2.39		0.345
BR GIC 10A	segregation	felsic segregation in upper gabbro	Line 130 GIC10Afsp1	270			58.71	0.01	25.62		0	0	7.13	7.21	0.39	0.21		99.29		2.64	1.36	0	0.01	0	0	0		0.34	0.63	0.02		5			34.52	63.22	2.26		0.345
BR GIC 10A	segregation	felsic segregation in upper gabbro	Line 131 GIC10Afsp1	271			58.09	0.02	25.62	0.03	0	0	7.27	7.09	0.43	0.26		98.82		2.63	1.37	0	0.01	0	0	0		0.35	0.62	0.02		5.01			35.26	62.26	2.49		0.353
BR GIC 10A	segregation	felsic segregation in upper gabbro	Line 132 GIC10Afsp1	272			58.49	0	25.72	0.01	0.02	0.01	7.32	7.11	0.42	0.26		99.35		2.63	1.36	0	0.01	0	0	0		0.35	0.62	0.02		5.01			35.36	62.2	2.43		0.354
BR GIC 10A	segregation	felsic segregation in upper gabbro	Line 133 GIC10Afsp1	273			58.2	0	25.77		0	0	7.19	7.03	0.4	0.22		98.8		2.63	1.37	0	0.01	0	0	0		0.35	0.62	0.02		5			35.26	62.39	2.35		0.353
BR GIC 10A	segregation	felsic segregation in upper gabbro	Line 134 GIC10Afsp1	274			58.18	0	25.89		0.02	0	7.23	7.23	0.37	0.15		99.07		2.63	1.38	0	0.01	0	0	0		0.35	0.63	0.02		5.01			34.85	63.04	2.11		0.349
BR GIC 10A	segregation	felsic segregation in upper gabbro	Line 135 GIC10Afsp1	275			58.54	0	25.78	0.03	0	0	7.19	7.16	0.41	0.12		99.23		2.64	1.37	0	0	0	0	0		0.35	0.62	0.02		5			34.86	62.75	2.39		0.349
BR GIC 10A	segregation	felsic segregation in upper gabbro	Line 136 GIC10Afsp1	276			58.15	0.02	25.88		0.02	0.01	7.36	7.27	0.19	0.04		98.93		2.63	1.38	0	0	0	0	0		0.36	0.64	0.01		5.01			35.5	63.41	1.09		0.355
BR GIC 10A	segregation	felsic segregation in upper gabbro	Line 137 GIC10Afsp1	277			58.31	0.01	25.79	0	0	0.02	7.14	7.4	0.33	0.06		99.07		2.63	1.37	0	0	0	0	0		0.35	0.65	0.02		5.02			34.12	63.98	1.9		0.341
BR GIC 10A	segregation	felsic segregation in upper gabbro	Line 138 GIC10Afsp1	278			57.96	0.06	25.73		0	0	7.05	7.25	0.36	0.09		98.52		2.63	1.38	0	0	0	0	0		0.34	0.64	0.02		5.01			34.23	63.68	2.09		0.342
BR GIC 10A	segregation	felsic segregation in upper gabbro	Line 139 GIC10Afsp1	279			58.08	0.02	25.74	0.03	0	0	7.12	7.25	0.3	0.13		98.66		2.63	1.37	0	0	0	0	0		0.35	0.64	0.02		5.01			34.56	63.71	1.73		0.346
BR GIC 10A	segregation	felsic segregation in upper gabbro	Line 140 GIC10Afsp1	280			58.42	0	25.86	0	0	0.02	7.04	7.19	0.41	0.15		99.08		2.63	1.37	0	0.01	0	0	0		0.34	0.63	0.02		5.01			34.3	63.34	2.36		0.343
BR GIC 10A	segregation	felsic segregation in upper gabbro	Line 141 GIC10Afsp1	281			58.77	0.02	25.65		0.01	0.01	7.13	7.3	0.36	0.13		99.38		2.64	1.36	0	0	0	0	0		0.34	0.64	0.02		5.01			34.31	63.61	2.09		0.343
BR GIC 10A	segregation	felsic segregation in upper gabbro	Line 142 GIC10Afsp1	282			58.3	0	25.61		0	0	7.17	7.26	0.36	0.14		98.84		2.64	1.36	0	0.01	0	0	0		0.35	0.64	0.02		5.01			34.59	63.37	2.04		0.346
BR GIC 10A	segregation	felsic segregation in upper gabbro	Line 143 GIC10Afsp1	283			58.8	0.09	25.68		0	0.02	6.93	7.39	0.43	0.16		99.5		2.64	1.36	0	0.01	0	0	0		0.33	0.64	0.02		5.01			33.29	64.25	2.46		0.333
BR GIC 10A	segregation	felsic segregation in upper gabbro	Line 144 GIC10Afsp1	284			58.45	0.04	25.76	0.04	0	0	7.19	7.13	0.42	0.23		99.26		2.63	1.37	0	0.01	0	0	0		0.35	0.62	0.02		5			34.94	62.65	2.41		0.349
BR GIC 10A	segregation	felsic segregation in upper gabbro	Line 145 GIC10Afsp1	285			58.52	0.02	25.7	0.01	0	0.02	6.99	7.24	0.39	0.23		99.12		2.64	1.37	0	0.01	0	0	0		0.34	0.63	0.02		5.01			34	63.73	2.27		0.34
BR GIC 10A	segregation	felsic segregation in upper gabbro	Line 146 GIC10Afsp1	286			58.59	0	25.46		0.01	0.02	6.99	7.33	0.4	0.19		98.98		2.64	1.35	0	0.01	0	0	0		0.34	0.64	0.02		5.01			33.74	63.98	2.28		0.337
BR GIC 10A	segregation	felsic segregation in upper gabbro	Line 147 GIC10Afsp1	287			58.71	0.02	25.66		0	0.02	7.05	7.3	0.39	0.23		99.38		2.64	1.36	0	0.01	0	0	0		0.34	0.64	0.02		5.01			33.99	63.74	2.26		0.34
BR GIC 10A	segregation	felsic segregation in upper gabbro	Line 148 GIC10Afsp1	288			58.87	0.06	25.41		0	0	6.91	7.3	0.43	0.24		99.22		2.65	1.35	0	0.01	0	0	0		0.33	0.64	0.02		5			33.48	64.02	2.5		0.335
BR GIC 10A	segregation	felsic segregation in upper gabbro	Line 149 GIC10Afsp1	289			58.68	0.03	25.43		0	0	6.96	7.39	0.48	0.2		99.17		2.65	1.35	0	0.01	0	0	0		0.34	0.65	0.03		5.01			33.3	63.98	2.72		0.333
BR GIC 10A	segregation	felsic segregation in upper gabbro	Line 150 GIC10Afsp1	290			58.88	0.01	25.67	0.02	0	0.01	6.87	7.36	0.43	0.21		99.45		2.64	1.36	0	0.01	0	0	0		0.33	0.64	0.02		5.01			33.17	64.35	2.47		0.332
BR GIC 10A	segregation	felsic segregation in upper gabbro	Line 151 GIC10Afsp1	291			58.85	0	25.49		0	0	6.78	7.5	0.41	0.19		99.21		2.65	1.35	0	0.01	0	0	0		0.33	0.65	0.02		5.01			32.52	65.11	2.37		0.325
BR GIC 10A	segregation	felsic segregation in upper gabbro	Line 152 GIC10Afsp1	292			58.6	0	25.34		0	0.01	6.89	7.5	0.45	0.21		98.98		2.65	1.35	0	0.01	0	0	0		0.33	0.66	0.03		5.02			32.79	64.67	2.54		0.328
BR GIC 10A	segregation	felsic segregation in upper gabbro	Line 153 GIC10Afsp1	293			58.94	0	25.2		0.03	0	6.65	7.5	0.47	0.22		99.02		2.66	1.34	0	0.01	0	0	0		0.32	0.66	0.03		5.01			32.01	65.32	2.67		0.32
BR GIC 10A	segregation	felsic segregation in upper gabbro	Line 154 GIC10Afsp1	294			59.19	0	25.26		0.02	0.01	6.75	7.67	0.37	0.24		99.5		2.66	1.34	0	0.01	0	0	0		0.32	0.67	0.02		5.02			32.03	65.9	2.08		0.32
BR GIC 10A	segregation	felsic segregation in upper gabbro	Line 155 GIC10Afsp1	295			59.36	0.03	25.1		0	0	6.7	7.38	0.47	0.19		99.22		2.67	1.33	0	0.01	0	0	0		0.32	0.64	0.03		5			32.51	64.8	2.69		0.325
BR GIC 10A	segregation	felsic segregation in upper gabbro	Line 156 GIC10Afsp1	296			59.28	0	25.11	0.02	0	0.02	6.61	7.63	0.42	0.23		99.32		2.67	1.33	0	0.01	0	0	0		0.32	0.67	0.02		5.01			31.6	66	2.4		0.316
BR GIC 10A	segregation	felsic segregation in upper gabbro	Line 157 GIC10Afsp1	297			59.09	0.04	25.1		0.05	0.02	6.46	7.55	0.49	0.21		99.01		2.66	1.33	0	0.01	0	0	0		0.31	0.66	0.03		5.01			31.2	66.01	2.79		0.312
BR GIC 10A	segregation	felsic segregation in upper gabbro	Line 158 GIC10Afsp1	298			59.43	0	25.17	0.01	0.02	0.01	6.43	7.59	0.45	0.19		99.31		2.67	1.33	0	0.01	0	0	0		0.31	0.66	0.03		5.01			31.06	66.33	2.61		0.311
BR GIC 10A	segregation	felsic segregation in upper gabbro	Line 159 GIC10Afsp1	299			59	0.06	24.88	0.01	0.01	0	6.44	7.55	0.45	0.19		98.59		2.67	1.33	0	0.01	0	0	0		0.31	0.66	0.03		5.01			31.2	66.21	2.6		0.312
BR GIC 10A	segregation	felsic segregation in upper gabbro	Line 160 GIC10Afsp1	300			59.38	0	24.9		0.01	0	6.34	7.75	0.47	0.21		99.06		2.68	1.32	0	0.01	0	0	0		0.31	0.68	0.03		5.02			30.3	67.03	2.67		0.303
BR GIC 10A	segregation	felsic segregation in upper gabbro	Line 161 GIC10Afsp1	301			59.57	0	24.95	0.03	0.02	0.01	6.23	7.77	0.48	0.2		99.25		2.68	1.32	0	0.01	0	0	0		0.3	0.68	0.03		5.01			29.85	67.4	2.75		0.298
BR GIC 10A	segregation	felsic segregation in upper gabbro	Line 162 GIC10Afsp1	302			59.18	0	24.95	0.05	0.01	0.03	6.31	7.8	0.44	0.2		98.97		2.67	1.33	0	0.01	0	0	0		0.3	0.68	0.03		5.02			30.1	67.4	2.5		0.301
BR GIC 10A	segregation	felsic segregation in upper gabbro	Line 163 GIC10Afsp1	303			59.44	0.01	24.85		0	0	6.13	7.74	0.48	0.22		98.86		2.68	1.32	0	0.01	0	0	0		0.3	0.68	0.03		5.01			29.58	67.64	2.78		0.296
BR GIC 10A	segregation	felsic segregation in upper gabbro	Line 164 GIC10Afsp1	304			60.08	0.02	24.73		0	0	6	8.01	0.46	0.19		99.49		2.69	1.31	0	0.01	0	0	0		0.29	0.7	0.03		5.02			28.52	68.87	2.6		0.285
BR GIC 10A	segregation	felsic segregation in upper gabbro	Line 165 GIC10Afsp1	305			60.05	0.08	24.56	0.04	0.01	0.03	5.95	7.91	0.5	0.22		99.34		2.7	1.3	0	0.01	0	0	0		0.29	0.69	0.03		5.01			28.54	68.64	2.83		0.285
BR GIC 10A	segregation	felsic segregation in upper gabbro	Line 166 GIC10Afsp1	306			60.29	0.06	24.45	0.03	0	0	5.82	8.1	0.49	0.24		99.48		2.7	1.29	0	0.01	0	0	0		0.28	0.7	0.03		5.02			27.63	69.59	2.79		0.276
BR GIC 10A	segregation	felsic segregation in upper gabbro	Line 167 GIC10Afsp1	307			60.03	0	24.48		0.04	0	5.71	8.04	0.56	0.16		99		2.7	1.3	0	0.01	0	0	0		0.28	0.7	0.03		5.02			27.29	69.52	3.18		0.273
BR GIC 10A	segregation	felsic segregation in upper gabbro	Line 168 GIC10Afsp1	308			61.72	0	25.01		0	0	5.71	8.24	0.5	0.19		101.37		2.71	1.29	0	0.01	0	0	0		0.27	0.7	0.03		5.01			26.93	70.25	2.81		0.269
BR GIC 10A	segregation	felsic segregation in upper gabbro	Line 169 GIC10Afsp1	309			60.37	0	24.09		0.02	0	5.47	8.13	0.52	0.14		98.74		2.72	1.28	0	0.01	0	0	0		0.26	0.71	0.03		5.01			26.31	70.72	2.97		0.263
BR GIC 10A	segregation	felsic segregation in upper gabbro	Line 170 GIC10Afsp1	310			61.1	0.02	24.06	0.01	0.02	0.01	5.27	8.35	0.53	0.22		99.58		2.73	1.27	0	0.01	0	0	0		0.25	0.72	0.03		5.01			25.09	71.89	3.02		0.251
BR GIC 10A	segregation	felsic segregation in upper gabbro	Line 171 GIC10Afsp1	311			61.32	0	23.54		0.02	0	5.16	8.48	0.53	0.14		99.19		2.75	1.24	0	0.01	0	0	0		0.25	0.74	0.03		5.01			24.44	72.6	2.96		0.244
BR GIC 10A	segregation	felsic segregation in upper gabbro	Line 172 GIC10Afsp1	312			61.48	0.02	23.67	0.06	0.02	0.01	4.77	8.61	0.49	0.17		99.3		2.75	1.25	0	0.01	0	0	0		0.23	0.75	0.03		5.01			22.82	74.42	2.77		0.228
BR GIC 10A	segregation	felsic segregation in upper gabbro	Line 173 GIC10Afsp1	313			61.63	0.03	23.45		0	0	4.7	8.66	0.45	0.1		99.01		2.76	1.24	0	0	0	0	0		0.23	0.75	0.03		5.01			22.47	74.99	2.53		0.225
BR GIC 10A	segregation	felsic segregation in upper gabbro	Line 174 GIC10Afsp1	314			61.25	0.03	23.84		0	0	4.99	8.61	0.42	0.16		99.31		2.74	1.26	0	0.01	0	0	0		0.24	0.75	0.02		5.02			23.69	73.96	2.36		0.237
BR GIC 10A	segregation	felsic segregation in upper gabbro	Line 175 GIC10Afsp1	315			61.19	0	23.67		0	0	4.85	8.68	0.43	0.09		98.9		2.75	1.25	0	0	0	0	0		0.23	0.76	0.02		5.02			23.01	74.55	2.45		0.23
BR GIC 10A	segregation	felsic segregation in upper gabbro	Line 176 GIC10Afsp1	316			61.99	0.03	23.72		0.03	0.01	4.74	8.84	0.5	0.18		100.04		2.75	1.24	0	0.01	0	0	0		0.23	0.76	0.03		5.02			22.22	75	2.78		0.222
BR GIC 10A	segregation	felsic segregation in upper gabbro	Line 177 GIC10Afsp1	317			61.18	0	24.02		0.01	0	5.24	8.24	0.5	0.13		99.32		2.74	1.27	0	0	0	0	0		0.25	0.71	0.03		5			25.26	71.87	2.87		0.253
BR GIC 10A	segregation	felsic segregation in upper gabbro	Line 178 GIC10Afsp1	318			61.75	0	23.25	0.02	0.02	0.01	4.42	8.97	0.45	0.12		99.02		2.77	1.23	0	0	0	0	0		0.21	0.78	0.03		5.02			20.85	76.63	2.52		0.208
BR GIC 10A	segregation	felsic segregation in upper gabbro	Line 179 GIC10Afsp1	319			60.68	0	23.48		0	0	4.59	8.65	0.44	0.13		97.96		2.75	1.25	0	0	0	0	0		0.22	0.76	0.03		5.02			22.1	75.39	2.52		0.221
BR GIC 10A	segregation	felsic segregation in upper gabbro	Line 180 GIC10Afsp1	320			61.71	0.02	23.95	0.06	0.01	0.01	5.14	8.6	0.23	0.11		99.85		2.74	1.26	0	0	0	0	0		0.25	0.74	0.01		5			24.53	74.16	1.31		0.245
BR GIC 10A	segregation	felsic segregation in upper gabbro	Line 1 BRGIC10f2	321			62.64	0.03	23.28	0	0.01	0.01	4.21	9.24	0.39	0.09		99.89		2.78	1.22	0	0	0	0	0		0.2	0.79	0.02		5.02			19.66	78.15	2.18		0.197
BR GIC 10A	segregation	felsic segregation in upper gabbro	Line 2 BRGIC10f2	322			62.58	0.01	23.23	0.01	0	0	3.98	9.27	0.39	0.09		99.56		2.78	1.22	0	0	0	0	0		0.19	0.8	0.02		5.02			18.77	79.07	2.16		0.188
BR GIC 10A	segregation	felsic segregation in upper gabbro	Line 3 BRGIC10f2	323			62.76	0	23.04	0.02	0	0	3.84	9.26	0.36	0.13		99.41		2.79	1.21	0	0	0	0	0		0.18	0.8	0.02		5.01			18.26	79.68	2.06		0.183
BR GIC 10A	segregation	felsic segregation in upper gabbro	Line 4 BRGIC10f2	324			63.25	0	22.96		0	0	3.74	8.83	1.19	0.11		100.08		2.8	1.2	0	0	0	0	0		0.18	0.76	0.07		5.01			17.69	75.62	6.69		0.177
BR GIC 10A	segregation	felsic segregation in upper gabbro	Line 5 BRGIC10f2	325			62.92	0	22.85	0.01	0	0	3.73	9.39	0.43	0.12		99.46		2.8	1.2	0	0	0	0	0		0.18	0.81	0.02		5.02			17.57	80.03	2.4		0.176
BR GIC 10A	segregation	felsic segregation in upper gabbro	Line 6 BRGIC10f2	326			62.97	0.04	23.17	0.04	0.04	0	4.12	9.22	0.47	0.11		100.18		2.79	1.21	0	0	0	0	0		0.2	0.79	0.03		5.02			19.28	78.1	2.62		0.193
BR GIC 10A	segregation	felsic segregation in upper gabbro	Line 7 BRGIC10f2	327			62.28	0	22.84	0.03	0.01	0.03	4.02	9.06	0.43	0.12		98.81		2.79	1.21	0	0	0	0	0		0.19	0.79	0.02		5.01			19.2	78.35	2.45		0.192
BR GIC 10A	segregation	felsic segregation in upper gabbro	Line 8 BRGIC10f2	328			62.36	0.02	23.09		0	0	4.33	8.97	0.48	0.04		99.29		2.78	1.21	0	0	0	0	0		0.21	0.78	0.03		5.01			20.46	76.82	2.71		0.205
BR GIC 10A	segregation	felsic segregation in upper gabbro	Line 9 BRGIC10f2	329			62.52	0.03	22.98		0	0	4.02	9.23	0.5	0.11		99.37		2.79	1.21	0	0	0	0	0		0.19	0.8	0.03		5.02			18.86	78.37	2.77		0.189
BR GIC 10A	segregation	felsic segregation in upper gabbro	Line 10 BRGIC10f2	330			62.71	0.01	23.08		0	0	4.07	9.01	0.62	0.13		99.62		2.79	1.21	0	0	0	0	0		0.19	0.78	0.04		5.01			19.27	77.23	3.5		0.193
BR GIC 10A	segregation	felsic segregation in upper gabbro	Line 11 BRGIC10f2	331			62.67	0	23.04		0	0	3.94	9.02	0.53	0.18		99.39		2.79	1.21	0	0.01	0	0	0		0.19	0.78	0.03		5.01			18.86	78.1	3.04		0.189
BR GIC 10A	segregation	felsic segregation in upper gabbro	Line 12 BRGIC10f2	332			62.64	0.02	22.98		0	0.01	4.07	8.83	0.62	0.15		99.32		2.79	1.21	0	0.01	0	0	0		0.19	0.76	0.03		5			19.57	76.9	3.52		0.196
BR GIC 10A	segregation	felsic segregation in upper gabbro	Line 13 BRGIC10f2	333			62.65	0.01	23.05	0.05	0	0.01	4.1	8.97	0.59	0.15		99.57		2.79	1.21	0	0.01	0	0	0		0.2	0.77	0.03		5.01			19.47	77.18	3.35		0.195
BR GIC 10A	segregation	felsic segregation in upper gabbro	Line 14 BRGIC10f2	334			62.68	0.05	22.86		0.03	0.01	3.98	8.96	0.54	0.15		99.26		2.8	1.2	0	0.01	0	0	0		0.19	0.78	0.03		5			19.09	77.83	3.08		0.191
BR GIC 10A	segregation	felsic segregation in upper gabbro	Line 15 BRGIC10f2	335			62.61	0	22.91	0.02	0	0.01	3.97	8.92	0.62	0.14		99.2		2.8	1.21	0	0.01	0	0	0		0.19	0.77	0.04		5.01			19.06	77.41	3.54		0.191
BR GIC 10A	segregation	felsic segregation in upper gabbro	Line 16 BRGIC10f2	336			62.15	0.03	23.03		0	0	3.94	8.96	0.55	0.16		98.82		2.79	1.22	0	0.01	0	0	0		0.19	0.78	0.03		5.01			18.92	77.91	3.17		0.189
BR GIC 10A	segregation	felsic segregation in upper gabbro	Line 17 BRGIC10f2	337			62.64	0	23.07		0	0.01	3.99	8.94	0.6	0.16		99.4		2.79	1.21	0	0.01	0	0	0		0.19	0.77	0.03		5.01			19.12	77.44	3.43		0.191
BR GIC 10A	segregation	felsic segregation in upper gabbro	Line 18 BRGIC10f2	338			62.51	0	23.03	0.03	0	0	4.02	9.04	0.53	0.13		99.3		2.79	1.21	0	0	0	0	0		0.19	0.78	0.03		5.01			19.14	77.85	3.02		0.191
BR GIC 10A	segregation	felsic segregation in upper gabbro	Line 19 BRGIC10f2	339			62.53	0	23.08	0	0.01	0.02	4.08	8.99	0.55	0.13		99.38		2.79	1.21	0	0	0	0	0		0.19	0.78	0.03		5.01			19.41	77.47	3.12		0.194
BR GIC 10A	segregation	felsic segregation in upper gabbro	Line 20 BRGIC10f2	340			62.33	0	22.92	0.02	0.02	0	4.04	8.9	0.6	0.13		98.97		2.79	1.21	0	0	0	0	0		0.19	0.77	0.03		5.01			19.36	77.2	3.45		0.194
BR GIC 10A	segregation	felsic segregation in upper gabbro	Line 21 BRGIC10f2	341			62.48	0.02	23.12	0.01	0	0.01	4	8.95	0.55	0.1		99.23		2.79	1.22	0	0	0	0	0		0.19	0.77	0.03		5.01			19.18	77.67	3.14		0.192
BR GIC 10A	segregation	felsic segregation in upper gabbro	Line 22 BRGIC10f2	342			62.66	0	23.06		0.01	0	4.11	9.24	0.64	0.12		99.84		2.79	1.21	0	0	0	0	0		0.2	0.8	0.04		5.03			19.05	77.43	3.52		0.19
BR GIC 10A	segregation	felsic segregation in upper gabbro	Line 23 BRGIC10f2	343			62.79	0.05	23.11	0.03	0	0	4.08	9.06	0.56	0.12		99.79		2.79	1.21	0	0	0	0	0		0.19	0.78	0.03		5.01			19.31	77.56	3.13		0.193
BR GIC 10A	segregation	felsic segregation in upper gabbro	Line 24 BRGIC10f2	344			62.19	0	23.12	0.04	0.05	0	4.01	8.93	0.58	0.11		99.02		2.78	1.22	0	0	0	0	0		0.19	0.78	0.03		5.01			19.22	77.49	3.29		0.192
BR GIC 10A	segregation	felsic segregation in upper gabbro	Line 25 BRGIC10f2	345			62.64	0	23.05		0.01	0	4.01	8.89	0.5	0.14		99.23		2.79	1.21	0	0.01	0	0	0		0.19	0.77	0.03		5			19.37	77.77	2.86		0.194
BR GIC 10A	segregation	felsic segregation in upper gabbro	Line 26 BRGIC10f2	346			62.39	0	23.13	0.01	0	0	4.1	8.98	0.52	0.13		99.25		2.79	1.22	0	0	0	0	0		0.2	0.78	0.03		5.01			19.56	77.47	2.97		0.196
BR GIC 10A	segregation	felsic segregation in upper gabbro	Line 27 BRGIC10f2	347			62.49	0.02	23.25		0.01	0	4.28	8.97	0.44	0.14		99.61		2.78	1.22	0	0.01	0	0	0		0.2	0.77	0.02		5.01			20.34	77.17	2.49		0.203
BR GIC 10A	segregation	felsic segregation in upper gabbro	Line 28 BRGIC10f2	348			62.82	0	23.03	0.07	0	0	3.95	9.05	0.46	0.14		99.52		2.8	1.21	0	0.01	0	0	0		0.19	0.78	0.03		5			18.92	78.46	2.61		0.189
BR GIC 10A	segregation	felsic segregation in upper gabbro	Line 29 BRGIC10f2	349			63.1	0	22.87		0	0	3.94	9.13	0.47	0.08		99.59		2.8	1.2	0	0	0	0	0		0.19	0.79	0.03		5			18.73	78.58	2.68		0.187
BR GIC 10A	segregation	felsic segregation in upper gabbro	Line 30 BRGIC10f2	350			62.34	0.04	22.9		0	0	3.89	8.98	0.42	0.13		98.71		2.79	1.21	0	0	0	0	0		0.19	0.78	0.02		5			18.85	78.72	2.43		0.188
BR GIC 10A	segregation	felsic segregation in upper gabbro	BRGIC10A351	351			64.03		18.57		0.01	0.01	0.01	0.8	16.13	0.04		99.6		2.98	1.02	0	0	0	0	0		0	0.07	0.96		5.03			0.03	7.01	92.95		0
BR GIC 10A	segregation	felsic segregation in upper gabbro	BRGIC10A352	352			67.8		19.67	0.02	0.01		0.06	11.64	0.11	0.06		99.36		2.98	1.02	0	0	0	0	0		0	0.99	0.01		5.01			0.28	99.1	0.62		0.003
BR GIC 10A	segregation	felsic segregation in upper gabbro	BRGIC10A353	353			63.31	0	18.49	0.04	0.01		0.01	0.74	16.2	0.01		98.81		2.97	1.02	0	0	0	0	0		0	0.07	0.97		5.03			0.04	6.48	93.48		0
BR GIC 10A	segregation	felsic segregation in upper gabbro	BRGIC10A354	354			64.32		18.6		0.02		0.01	1.03	15.55	0.05		99.58		2.98	1.02	0	0	0	0	0		0	0.09	0.92		5.02			0.04	9.18	90.79		0
BR GIC 10A	segregation	felsic segregation in upper gabbro	BRGIC10A355	355			67.46		19.78				0.2	11.53	0.1	0.04		99.11		2.98	1.03	0	0	0	0	0		0.01	0.99	0.01		5.01			0.94	98.5	0.56		0.009
BR GIC 10A	segregation	felsic segregation in upper gabbro	BRGIC10A356	356			64.05	0.05	18.69		0.02			0.72	16.39	0.09		100.02		2.97	1.02	0	0	0	0	0		0	0.07	0.97		5.03			0	6.28	93.72		0
BR GIC 10A	segregation	felsic segregation in upper gabbro	BRGIC10A357	357			64.19		18.62	0		0	0.01	0.73	16.41	0.02		99.98		2.98	1.02	0	0	0	0	0		0	0.07	0.97		5.03			0.03	6.32	93.64		0
BR GIC 10A	segregation	felsic segregation in upper gabbro	BRGIC10A358	358			63.88	0.01	18.57	0.05	0			0.61	16.5	0.09		99.71		2.97	1.02	0	0	0	0	0		0	0.06	0.98		5.03			0	5.32	94.68		0
BR GIC 10A	segregation	felsic segregation in upper gabbro	BRGIC10A359	359			67.97		19.75		0.01		0.13	11.64	0.12	0.03		99.65		2.98	1.02	0	0	0	0	0		0.01	0.99	0.01		5.01			0.6	98.73	0.67		0.006
BR GIC 10A	segregation	felsic segregation in upper gabbro	BRGIC10A360	360			63.73	0.02	18.52	0.02	0.02			0.66	16.36	0.04		99.36		2.98	1.02	0	0	0	0	0		0	0.06	0.97		5.03			0	5.74	94.26		0
BR GIC 10A	segregation	felsic segregation in upper gabbro	BRGIC10A361	361			68.12	0.02	19.64				0.29	11.15	0.16	0.04		99.42		2.99	1.02	0	0	0	0	0		0.01	0.95	0.01		4.98			1.41	97.65	0.94		0.014
BR GIC 10A	segregation	felsic segregation in upper gabbro	BRGIC10A362	362			63.83	0	18.52	0.06	0.01		0	0.73	16.26	0.01		99.44		2.98	1.02	0	0	0	0	0		0	0.07	0.97		5.03			0.02	6.42	93.56		0
BR GIC 10A	segregation	felsic segregation in upper gabbro	BRGIC10A363	363			63.89	0	18.5				0.02	0.99	15.9	0.06		99.36		2.98	1.02	0	0	0	0	0		0	0.09	0.95		5.03			0.1	8.66	91.24		0.001
BR GIC 10A	segregation	felsic segregation in upper gabbro	BRGIC10A364	364			64.2		18.65		0.01		0.01	1.26	15.63	0.04		99.79		2.98	1.02	0	0	0	0	0		0	0.11	0.92		5.03			0.04	10.88	89.08		0
BR GIC 10A	segregation	felsic segregation in upper gabbro	BRGIC10A365	365			64.15		18.52	0.03			0.02	1.58	15.09	0.05		99.43		2.98	1.01	0	0	0	0	0		0	0.14	0.89		5.03			0.08	13.74	86.19		0.001
BR GIC 10A	segregation	felsic segregation in upper gabbro	BRGIC10A366	366			64.13		18.77	0.01			0.01	1.61	14.72	0.02		99.26		2.98	1.03	0	0	0	0	0		0	0.15	0.87		5.02			0.03	14.28	85.68		0
BR GIC 10A	segregation	felsic segregation in upper gabbro	BRGIC10A367	367			64.23	0.01	18.59	0.05	0.01		0.01	1.06	15.72	0.03		99.72		2.98	1.02	0	0	0	0	0		0	0.1	0.93		5.02			0.03	9.32	90.65		0
BR GIC 10A	segregation	felsic segregation in upper gabbro	BRGIC10A368	368			66.97	0.05	19.85	0.01		0.02	0.09	11.65	0.07	0.07		98.78		2.97	1.04	0	0	0	0	0		0	1	0		5.02			0.41	99.18	0.41		0.004
BR GIC 10A	segregation	felsic segregation in upper gabbro	BRGIC10A369	369			63.99	0.02	18.67				0.03	1.54	15.44	0.01		99.68		2.97	1.02	0	0	0	0	0		0	0.14	0.91		5.05			0.13	13.16	86.71		0.001
BR GIC 10A	segregation	felsic segregation in upper gabbro	BRGIC10A369	370			67.72		19.78	0	0.02		0.12	11.73	0.22	0.02		99.61		2.98	1.02	0	0	0	0	0		0.01	1	0.01		5.02			0.54	98.24	1.22		0.005
BR GIC 10A	segregation	felsic segregation in upper gabbro	BRGIC10A370	371			68.24	0.02	19.84	0.02	0.05		0.15	11.9	0.08	0.04		100.34		2.98	1.02	0	0	0	0	0		0.01	1.01	0		5.02			0.67	98.91	0.42		0.007
BR GIC 10A	segregation	felsic segregation in upper gabbro	BRGIC10A371	372			64.22		18.74	0.02	0		0.01	1	15.87	0.04		99.9		2.97	1.02	0	0	0	0	0		0	0.09	0.94		5.03			0.05	8.75	91.21		0
BR GIC 10A	segregation	felsic segregation in upper gabbro	BRGIC10A372	373			64.3	0.02	18.63				0.01	1.25	15.43			99.64		2.98	1.02	0	0	0	0	0		0	0.11	0.91		5.02			0.03	10.99	88.98		0
BR GIC 10A	segregation	felsic segregation in upper gabbro	BRGIC10A373	374			67.8	0.05	19.82	0	0.01	0.01	0.12	11.63	0.1	0.01		99.54		2.98	1.03	0	0	0	0	0		0.01	0.99	0.01		5.01			0.55	98.89	0.56		0.005
BR GIC 10A	segregation	felsic segregation in upper gabbro	BRGIC10A374	375			68.19	0.01	19.71	0.02		0	0.12	11.56	0.1	0.08		99.79		2.99	1.02	0	0	0	0	0		0.01	0.98	0.01		5			0.57	98.86	0.57		0.006
BR GIC 10A	segregation	felsic segregation in upper gabbro	BRGIC10A375	376			64.11		18.53		0.01			1.49	15.33	0.02		99.48		2.98	1.01	0	0	0	0	0		0	0.13	0.91		5.04			0	12.87	87.13		0
BR GIC 10A	segregation	felsic segregation in upper gabbro	GIC10A1	1			62.24		24.03	0.13	0.01	0.02	4.81	8.53	0.41			100.18		2.75	1.25	0	0	0	0	0		0.23	0.73	0.02		5			23.18	74.46	2.36		0.232
BR GIC 10A	segregation	felsic segregation in upper gabbro	GIC10A2	2			62.09	0.03	23.99	0.09		0.02	4.89	8.56	0.46	0.05		100.18		2.75	1.25	0	0	0	0	0		0.23	0.74	0.03		5			23.37	74.02	2.61		0.234
																																			0	0	0		0
BR GIC 10b	segregation	felsic segregation in upper gabbro	10b6 11	457			63.7	0.01	19.12	0.01	0.02		0.07	0.49	16.52	0.03		99.97		2.96	1.05	0	0	0	0			0	0.04	0.98		5.03			0.33	4.27	95.39		0.003
BR GIC 10b	segregation	felsic segregation in upper gabbro	Line 1p	615			62.17		24.78	0.09		0.02	5.55	8.25	0.32	0.02		101.2		2.73	1.28	0	0	0	0	0		0.26	0.7	0.02		4.99			26.57	71.58	1.85		0.266
BR GIC 10b	segregation	felsic segregation in upper gabbro	Line 2p	616			61.48	0.02	24.97	0.09		0.02	5.88	8.44	0.25			101.15		2.7	1.29	0	0	0	0	0		0.28	0.72	0.01		5.01			27.42	71.22	1.37		0.274
BR GIC 10b	segregation	felsic segregation in upper gabbro	Line 3p	617			61.32		25.16	0.07	0.01		6.04	8.22	0.25	0.01		101.07		2.7	1.31	0	0	0	0	0		0.28	0.7	0.01		5.01			28.49	70.13	1.38		0.285
BR GIC 10b	segregation	felsic segregation in upper gabbro	Line 4p	618			60.86	0.02	24.98	0.06		0	5.95	8.06	0.26	0.02		100.22		2.7	1.31	0	0	0	0	0		0.28	0.69	0.01		5			28.55	69.96	1.49		0.285
BR GIC 10b	segregation	felsic segregation in upper gabbro	Line 5p	619			59.81	0.04	26.13	0.11			7.08	7.46	0.28			100.91		2.64	1.36	0	0	0	0	0		0.34	0.64	0.02		5			33.86	64.53	1.61		0.339
BR GIC 10b	segregation	felsic segregation in upper gabbro	Line 6p	620			58.78	0.04	26.77	0.08			8.06	7.07	0.25			101.05		2.6	1.4	0	0	0	0	0		0.38	0.61	0.01		5.01			38.11	60.48	1.41		0.381
BR GIC 10b	segregation	felsic segregation in upper gabbro	Line 7p	621			58.47	0.02	26.96	0.1			8.18	6.85	0.23			100.81		2.59	1.41	0	0	0	0	0		0.39	0.59	0.01		5			39.25	59.46	1.29		0.393
BR GIC 10b	segregation	felsic segregation in upper gabbro	Line 8p	622			58.34	0.01	26.96	0.12	0	0.01	8.17	6.9	0.22			100.72		2.59	1.41	0	0	0	0	0		0.39	0.59	0.01		5			39.06	59.7	1.25		0.391
BR GIC 10b	segregation	felsic segregation in upper gabbro	Line 9p	623			58.28	0.03	27.07	0.12		0.03	8.34	6.9	0.24	0.07		101.06		2.58	1.42	0	0	0	0	0		0.4	0.59	0.01		5.01			39.52	59.15	1.33		0.395
BR GIC 10b	segregation	felsic segregation in upper gabbro	Line 10p	624			58.22	0.05	27.09	0.16	0.01		8.43	6.66	0.27			100.87		2.58	1.42	0	0.01	0	0	0		0.4	0.57	0.02		5			40.53	57.94	1.52		0.405
BR GIC 10b	segregation	felsic segregation in upper gabbro	Line 11	625			58.17	0.06	27.19	0.12			8.42	6.77	0.26	0.02		101.02		2.58	1.42	0	0	0	0	0		0.4	0.58	0.01		5.01			40.11	58.39	1.5		0.401
BR GIC 10b	segregation	felsic segregation in upper gabbro	Line 12	626			58		27.22	0.1	0.01	0.01	8.53	6.78	0.3			100.94		2.58	1.42	0	0	0	0	0		0.41	0.58	0.02		5.01			40.3	57.99	1.71		0.403
BR GIC 10b	segregation	felsic segregation in upper gabbro	Line 13	627			58.01	0.05	27.36	0.14	0.01	0	8.62	6.66	0.29			101.14		2.57	1.43	0	0.01	0	0	0		0.41	0.57	0.02		5.01			41.01	57.33	1.66		0.41
BR GIC 10b	segregation	felsic segregation in upper gabbro	Line 14	628			53.38	0.03	24.61	4.19	0.03		7.8	6.77	0.21			97.01		2.53	1.37	0	0.17	0	0	0		0.4	0.62	0.01		5.1			38.45	60.35	1.2		0.385
BR GIC 10b	segregation	felsic segregation in upper gabbro	Line 15	629			56.02	0.02	26.68	0.12	0.01	0.01	8.46	6.17	0.27			97.76		2.57	1.44	0	0	0	0	0		0.42	0.55	0.02		4.99			42.42	55.96	1.62		0.424
BR GIC 10b	segregation	felsic segregation in upper gabbro	Line 16	630			60.33	0.03	28.19	0.21		0.01	8.23	7.77	0.3			105.08		2.58	1.42	0	0.01	0	0	0		0.38	0.64	0.02		5.04			36.34	62.07	1.59		0.363
BR GIC 10b	segregation	felsic segregation in upper gabbro	Line 17	631			57.67	0.04	27.2	0.16		0.01	8.73	6.45	0.3			100.55		2.57	1.43	0	0.01	0	0	0		0.42	0.56	0.02		5			42.07	56.23	1.69		0.421
BR GIC 10b	segregation	felsic segregation in upper gabbro	Line 18	632			57.75	0.06	27.32	0.13			8.71	6.51	0.29			100.77		2.57	1.43	0	0	0	0	0		0.42	0.56	0.02		5			41.82	56.54	1.64		0.418
BR GIC 10b	segregation	felsic segregation in upper gabbro	Line 19	633			57.66	0.09	27.44	0.48		0.03	8.8	6.58	0.3			101.39		2.56	1.43	0	0.02	0	0	0		0.42	0.57	0.02		5.01			41.78	56.52	1.7		0.418
BR GIC 10b	segregation	felsic segregation in upper gabbro	Line 20	634			57.8	0.05	27.51	0.15		0.01	8.79	6.61	0.25			101.16		2.56	1.44	0	0.01	0	0	0		0.42	0.57	0.01		5.01			41.74	56.82	1.44		0.417
BR GIC 10b	segregation	felsic segregation in upper gabbro	Line 21	635			58.02		27.45	0.13	0.01		8.64	6.43	0.28			100.96		2.57	1.43	0	0	0	0	0		0.41	0.55	0.02		4.99			41.9	56.46	1.64		0.419
BR GIC 10b	segregation	felsic segregation in upper gabbro	Line 22	636			58.09	0.03	27.6	0.13			8.53	6.64	0.31			101.32		2.57	1.44	0	0	0	0	0		0.4	0.57	0.02		5			40.8	57.46	1.74		0.408
BR GIC 10b	segregation	felsic segregation in upper gabbro	Line 23	637			58.01		27.52	0.18			8.66	6.66	0.28	0.03		101.33		2.57	1.44	0	0.01	0	0	0		0.41	0.57	0.02		5.01			41.16	57.25	1.58		0.412
BR GIC 10b	segregation	felsic segregation in upper gabbro	Line 24	638			58.06	0.02	27.22	0.12			8.44	6.62	0.3			100.79		2.58	1.43	0	0	0	0	0		0.4	0.57	0.02		5			40.6	57.66	1.74		0.406
BR GIC 10b	segregation	felsic segregation in upper gabbro	Line 25	639			57.79	0.03	27.33	0.14	0.02	0.01	8.56	6.66	0.26			100.79		2.57	1.43	0	0.01	0	0	0		0.41	0.57	0.01		5.01			40.93	57.6	1.47		0.409
BR GIC 10b	segregation	felsic segregation in upper gabbro	Line 26	640			57.89		27.21	0.15			8.58	6.61	0.27			100.7		2.58	1.43	0	0.01	0	0	0		0.41	0.57	0.02		5			41.12	57.36	1.52		0.411
BR GIC 10b	segregation	felsic segregation in upper gabbro	Line 27	641			58.08	0.06	27.2	0.14	0.03		8.51	6.68	0.28			100.97		2.58	1.42	0	0.01	0	0	0		0.4	0.57	0.02		5			40.65	57.78	1.56		0.407
BR GIC 10b	segregation	felsic segregation in upper gabbro	Line 28	642			58.13	0.03	27.19	0.15	0.03	0	8.51	6.64	0.32			100.99		2.58	1.42	0	0.01	0	0	0		0.4	0.57	0.02		5			40.7	57.5	1.8		0.407
BR GIC 10b	segregation	felsic segregation in upper gabbro	Line 29	643			56.75	0.05	26.61	0.1		0.03	8.36	6.6	0.27			98.77		2.58	1.42	0	0	0	0	0		0.41	0.58	0.02		5.01			40.53	57.9	1.57		0.405
BR GIC 10b	segregation	felsic segregation in upper gabbro	Line 30	644			57.63	0.03	27.22	0.15			8.5	6.49	0.33			100.34		2.57	1.43	0	0.01	0	0	0		0.41	0.56	0.02		5			41.2	56.91	1.89		0.412
BR GIC 10b	segregation	felsic segregation in upper gabbro	Line 31	645			57.91	0.04	27.21	0.16	0.02	0	8.52	6.78	0.3			100.95		2.57	1.43	0	0.01	0	0	0		0.41	0.58	0.02		5.01			40.3	58	1.7		0.403
BR GIC 10b	segregation	felsic segregation in upper gabbro	Line 32	646			58.01	0.04	27.38	0.17	0.01	0.01	8.55	6.72	0.3	0.05		101.24		2.57	1.43	0	0.01	0	0	0		0.41	0.58	0.02		5.01			40.59	57.7	1.71		0.406
BR GIC 10b	segregation	felsic segregation in upper gabbro	Line 33	647			24.09	0.04	11.07	0.12			4.39	2.43	0.12	0		42.27		2.57	1.39	0	0.01	0	0			0.5	0.5	0.02		4.99			49.14	49.22	1.64		0.491
BR GIC 10b	segregation	felsic segregation in upper gabbro	Line 34	648			58.13	0.04	27.19	0.11	0.01	0.02	8.46	6.7	0.26			100.9		2.58	1.42	0	0	0	0			0.4	0.58	0.01		5			40.48	58.03	1.48		0.405
BR GIC 10b	segregation	felsic segregation in upper gabbro	Line 35	649			58.24	0.01	27.24	0.14	0.02		8.4	6.74	0.28	0.04		101.09		2.58	1.42	0	0.01	0	0			0.4	0.58	0.02		5			40.16	58.26	1.58		0.402
BR GIC 10b	segregation	felsic segregation in upper gabbro	Line 36	650			58.23	0.01	27.16	0.13			8.49	6.74	0.31			101.06		2.58	1.42	0	0	0	0			0.4	0.58	0.02		5.01			40.32	57.92	1.76		0.403
BR GIC 10b	segregation	felsic segregation in upper gabbro	Line 37	651			58.02	0.02	27.21	0.2		0.02	8.39	6.67	0.28			100.8		2.58	1.43	0	0.01	0	0			0.4	0.58	0.02		5			40.31	58.06	1.63		0.403
BR GIC 10b	segregation	felsic segregation in upper gabbro	Line 38	652			58.04	0.06	27.28	0.27	0.02		8.42	6.66	0.27	0.02		101.04		2.58	1.43	0	0.01	0	0			0.4	0.57	0.02		5			40.48	57.96	1.56		0.405
BR GIC 10b	segregation	felsic segregation in upper gabbro	Line 39	653			59.23	0.05	27.67	0.13		0.02	8.32	7.14	0.31	0.03		102.9		2.58	1.42	0	0	0	0			0.39	0.6	0.02		5.02			38.49	59.82	1.69		0.385
BR GIC 10b	segregation	felsic segregation in upper gabbro	Line 40	654			58.28	0.07	27.18	0.15	0	0.01	8.45	6.64	0.3	0.03		101.12		2.58	1.42	0	0.01	0	0			0.4	0.57	0.02		5			40.57	57.7	1.73		0.406
BR GIC 10b	segregation	felsic segregation in upper gabbro	Line 41	655			57.89	0.01	27.31	0.15	0.01		8.42	6.61	0.29			100.67		2.58	1.43	0	0.01	0	0			0.4	0.57	0.02		5			40.65	57.71	1.64		0.406
BR GIC 10b	segregation	felsic segregation in upper gabbro	Line 42	656			58.33	0.06	27.24	0.12			8.48	6.75	0.25	0.06		101.29		2.58	1.42	0	0	0	0			0.4	0.58	0.01		5			40.42	58.19	1.4		0.404
BR GIC 10b	segregation	felsic segregation in upper gabbro	Line 43	657			57.72	0.02	27.28	0.18			8.52	6.59	0.26	0.02		100.6		2.57	1.43	0	0.01	0	0			0.41	0.57	0.01		5			41.02	57.47	1.5		0.41
BR GIC 10b	segregation	felsic segregation in upper gabbro	Line 44	658			58.19		27.28	0.15			8.46	6.68	0.28	0		101.04		2.58	1.43	0	0.01	0	0			0.4	0.57	0.02		5			40.52	57.88	1.59		0.405
BR GIC 10b	segregation	felsic segregation in upper gabbro	Line 45	659			58.44	0.05	27.38	0.16	0.04	0	8.6	6.71	0.28	0.04		101.69		2.58	1.42	0	0.01	0	0			0.41	0.57	0.02		5			40.8	57.61	1.58		0.408
BR GIC 10b	segregation	felsic segregation in upper gabbro	Line 46	660			58.5	0.03	27.34	0.12		0.01	8.56	6.65	0.24			101.44		2.58	1.42	0	0	0	0			0.4	0.57	0.01		5			40.98	57.67	1.35		0.41
BR GIC 10b	segregation	felsic segregation in upper gabbro	Line 47	661			59.37	0	27.01	0.05	0.02		7.89	7.24	0.14	0.01		101.74		2.61	1.4	0	0	0	0			0.37	0.62	0.01		5.01			37.29	61.92	0.78		0.373
BR GIC 10b	segregation	felsic segregation in upper gabbro	Line 48	662			62.33	0.02	24.61	0.07			5.41	8.49	0.3	0.05		101.28		2.73	1.27	0	0	0	0			0.25	0.72	0.02		5			25.63	72.71	1.66		0.256
BR GIC 10b	segregation	felsic segregation in upper gabbro	Line 49	663			62.84	0.04	25.01	0.06	0	0	5.55	8.58	0.24	0.02		102.34		2.73	1.28	0	0	0	0			0.26	0.72	0.01		5			26	72.69	1.31		0.26
BR GIC 10b	segregation	felsic segregation in upper gabbro	Line 50	664			62.98	0.01	24.04	0.07		0.01	4.79	8.87	0.29	0.01		101.07		2.76	1.24	0	0	0	0			0.22	0.75	0.02		5			22.61	75.79	1.6		0.226
BR GIC 10b	segregation	felsic segregation in upper gabbro	Line 51	665			62.45	0.08	24.43	0.15	0.02	0.02	5.13	8.65	0.25			101.16		2.74	1.26	0	0.01	0	0			0.24	0.74	0.01		5			24.35	74.24	1.41		0.243
BR GIC 10b	segregation	felsic segregation in upper gabbro	Line 52	666			62.53	0.03	24.83	0.1			5.33	8.69	0.3	0.08		101.88		2.73	1.28	0	0	0	0			0.25	0.73	0.02		5.01			24.91	73.43	1.66		0.249
BR GIC 10b	segregation	felsic segregation in upper gabbro	Line 53	667			62.58	0.05	24.49	0.08	0.01		5.22	8.68	0.26			101.35		2.74	1.26	0	0	0	0			0.25	0.74	0.01		5			24.6	73.96	1.44		0.246
BR GIC 10b	segregation	felsic segregation in upper gabbro	Line 54	668			62.88	0.03	24.51	0.12	0.01	0.04	5.14	8.6	0.2			101.52		2.74	1.26	0	0	0	0			0.24	0.73	0.01		4.99			24.54	74.33	1.13		0.245
BR GIC 10b	segregation	felsic segregation in upper gabbro	Line 55	669			61.86	0.02	25.11	0.14			5.84	8.47	0.15			101.59		2.71	1.3	0	0.01	0	0			0.27	0.72	0.01		5.01			27.37	71.81	0.83		0.274
BR GIC 10b	segregation	felsic segregation in upper gabbro	Line 1p	670			63.26	0.02	23.61	0.17	0.02		4.3	8.82	0.38			100.58		2.78	1.22	0	0.01	0	0			0.2	0.75	0.02		4.99			20.76	77.08	2.17		0.208
BR GIC 10b	segregation	felsic segregation in upper gabbro	Line 2p	671			62.36		23.96	0.14	0.03		5.14	8.65	0.49			100.77		2.75	1.25	0	0.01	0	0			0.24	0.74	0.03		5.01			24.04	73.25	2.71		0.24
BR GIC 10b	segregation	felsic segregation in upper gabbro	Line 3p	672			62.5		24.37	0.16		0	5.38	8.41	0.47			101.29		2.74	1.26	0	0.01	0	0			0.25	0.71	0.03		5			25.42	71.94	2.64		0.254
BR GIC 10b	segregation	felsic segregation in upper gabbro	Line 4p	673			62.22		24.29	0.16		0.03	5.16	8.44	0.49			100.78		2.74	1.26	0	0.01	0	0			0.24	0.72	0.03		5			24.54	72.71	2.75		0.245
BR GIC 10b	segregation	felsic segregation in upper gabbro	Line 5p	674			62.09	0.03	24.33	0.2		0.01	5.25	8.46	0.51			100.87		2.74	1.26	0	0.01	0	0			0.25	0.72	0.03		5.01			24.79	72.36	2.85		0.248
BR GIC 10b	segregation	felsic segregation in upper gabbro	Line 6p	675			61.96		24.64	0.2		0.02	5.51	8.28	0.52			101.12		2.72	1.28	0	0.01	0	0			0.26	0.71	0.03		5			26.09	71.01	2.9		0.261
BR GIC 10b	segregation	felsic segregation in upper gabbro	Line 7p	676			61.77	0.08	24.93	0.14	0	0.02	5.86	8.17	0.54	0.01		101.51		2.71	1.29	0	0.01	0	0			0.28	0.7	0.03		5.01			27.51	69.46	3.03		0.275
BR GIC 10b	segregation	felsic segregation in upper gabbro	Line 8p	677			61.64	0.01	24.96	0.16			6.09	7.92	0.47	0.08		101.33		2.71	1.29	0	0.01	0	0			0.29	0.67	0.03		5			29.03	68.31	2.66		0.29
BR GIC 10b	segregation	felsic segregation in upper gabbro	Line 9p	678			61.07	0.04	25.51	0.22			6.38	7.68	0.5			101.39		2.68	1.32	0	0.01	0	0			0.3	0.65	0.03		5			30.56	66.57	2.88		0.306
BR GIC 10b	segregation	felsic segregation in upper gabbro	Line 10	679			60.26	0.02	25.49	0.17		0.01	6.7	7.58	0.45	0.02		100.7		2.67	1.33	0	0.01	0	0			0.32	0.65	0.03		5			31.96	65.47	2.57		0.32
BR GIC 10b	segregation	felsic segregation in upper gabbro	Line 11	680			60.21	0.01	26.14	0.1	0.01	0.02	7.09	7.24	0.38			101.21		2.65	1.36	0	0	0	0			0.33	0.62	0.02		4.99			34.35	63.43	2.21		0.344
BR GIC 10b	segregation	felsic segregation in upper gabbro	Line 12	681			59.34		26.06	0.22	0.03		7.43	7.16	0.41	0.02		100.66		2.64	1.36	0	0.01	0	0			0.35	0.62	0.02		5			35.59	62.08	2.33		0.356
BR GIC 10b	segregation	felsic segregation in upper gabbro	Line 13	682			59.35	0.03	26.38	0.23	0.01	0.02	7.47	7.08	0.43			100.99		2.63	1.38	0	0.01	0	0			0.35	0.61	0.02		5			35.9	61.64	2.46		0.359
BR GIC 10b	segregation	felsic segregation in upper gabbro	Line 14	683			59.58	0.06	26.64	0.18	0.03	0.04	7.61	7.11	0.38			101.63		2.62	1.38	0	0.01	0	0			0.36	0.61	0.02		5			36.35	61.48	2.17		0.364
BR GIC 10b	segregation	felsic segregation in upper gabbro	Line 15	684			58.8	0.05	26.49	0.25	0	0	7.79	7.03	0.39			100.8		2.61	1.39	0	0.01	0	0			0.37	0.61	0.02		5.01			37.11	60.68	2.21		0.371
BR GIC 10b	segregation	felsic segregation in upper gabbro	Line 16	685			58.58	0.02	26.67	0.22	0.01		7.74	6.82	0.41	0.05		100.52		2.61	1.4	0	0.01	0	0			0.37	0.59	0.02		5			37.65	59.96	2.4		0.376
BR GIC 10b	segregation	felsic segregation in upper gabbro	Line 17	686			58.98	0.04	26.68	0.19	0.01	0.05	7.87	7.02	0.36	0		101.22		2.61	1.39	0	0.01	0	0			0.37	0.6	0.02		5.01			37.47	60.48	2.05		0.375
BR GIC 10b	segregation	felsic segregation in upper gabbro	Line 18	687			58.66		26.67	0.17			7.96	6.84	0.38			100.68		2.61	1.4	0	0.01	0	0			0.38	0.59	0.02		5			38.29	59.54	2.17		0.383
BR GIC 10b	segregation	felsic segregation in upper gabbro	Line 19	688			46.48		19.8	0.19	0.01		5.24	5.14	1.04			77.9		2.67	1.34	0	0.01	0	0			0.32	0.57	0.08		4.99			33.2	58.99	7.81		0.332
BR GIC 10b	segregation	felsic segregation in upper gabbro	Line 20	689			58.59	0.02	26.75	0.21	0		8.11	6.88	0.39			100.94		2.6	1.4	0	0.01	0	0			0.39	0.59	0.02		5.01			38.56	59.25	2.19		0.386
BR GIC 10b	segregation	felsic segregation in upper gabbro	Line 21	690			58.31	0.07	26.98	0.14	0.02	0.01	8.11	6.9	0.36			100.9		2.59	1.41	0	0.01	0	0			0.39	0.59	0.02		5.01			38.59	59.36	2.06		0.386
BR GIC 10b	segregation	felsic segregation in upper gabbro	Line 22	691			58.61	0.01	26.91	0.17		0.01	8.24	6.83	0.34			101.11		2.6	1.4	0	0.01	0	0			0.39	0.59	0.02		5			39.2	58.86	1.94		0.392
BR GIC 10b	segregation	felsic segregation in upper gabbro	Line 23	692			58.55		26.9	0.16		0.01	8.17	6.71	0.33			100.82		2.6	1.41	0	0.01	0	0			0.39	0.58	0.02		5			39.46	58.64	1.9		0.395
BR GIC 10b	segregation	felsic segregation in upper gabbro	Line 24	693			58.2	0.02	26.99	0.14			8.19	6.81	0.35	0.08		100.77		2.59	1.42	0	0.01	0	0			0.39	0.59	0.02		5.01			39.16	58.86	1.99		0.392
BR GIC 10b	segregation	felsic segregation in upper gabbro	Line 25	694			58.61	0.07	27.03	0.18			8.18	6.92	0.31			101.28		2.59	1.41	0	0.01	0	0			0.39	0.59	0.02		5.01			38.81	59.45	1.74		0.388
BR GIC 10b	segregation	felsic segregation in upper gabbro	Line 26	695			58.88	0.07	26.93	0.14			8.34	6.73	0.39			101.48		2.6	1.4	0	0.01	0	0			0.39	0.58	0.02		5			39.75	58.05	2.2		0.398
BR GIC 10b	segregation	felsic segregation in upper gabbro	Line 27	696			58.51		27.1	0.1		0.01	8.25	6.79	0.35			101.11		2.59	1.41	0	0	0	0			0.39	0.58	0.02		5			39.36	58.63	2.01		0.394
BR GIC 10b	segregation	felsic segregation in upper gabbro	Line 28	697			58.37		26.97	0.11		0.01	8.24	6.71	0.4			100.82		2.59	1.41	0	0	0	0			0.39	0.58	0.02		5			39.49	58.21	2.3		0.395
BR GIC 10b	segregation	felsic segregation in upper gabbro	Line 29	698			58.24	0.02	27.18	0.16			8.43	6.75	0.36	0.02		101.16		2.58	1.42	0	0.01	0	0			0.4	0.58	0.02		5.01			40.03	57.94	2.03		0.4
BR GIC 10b	segregation	felsic segregation in upper gabbro	Line 30	699			58.33	0.02	27.41	0.12		0.01	8.43	6.66	0.34			101.32		2.58	1.43	0	0	0	0			0.4	0.57	0.02		5			40.36	57.7	1.94		0.404
BR GIC 10b	segregation	felsic segregation in upper gabbro	Line 31	700			58.16		27.11	0.14			8.28	6.81	0.29	0		100.78		2.58	1.42	0	0.01	0	0			0.39	0.59	0.02		5.01			39.56	58.82	1.62		0.396
BR GIC 10b	segregation	felsic segregation in upper gabbro	Line 32	701			58.5	0.02	27.02	0.11	0.02	0.02	8.37	6.69	0.35			101.09		2.59	1.41	0	0	0	0			0.4	0.57	0.02		5			40.07	57.92	2.01		0.401
BR GIC 10b	segregation	felsic segregation in upper gabbro	Line 33	702			58.48		27.24	0.18	0	0.01	8.34	6.72	0.34			101.32		2.59	1.42	0	0.01	0	0			0.4	0.58	0.02		5			39.88	58.18	1.94		0.399
BR GIC 10b	segregation	felsic segregation in upper gabbro	Line 34	703			58.32	0.06	27.22	0.18			8.37	6.82	0.37	0.05		101.39		2.58	1.42	0	0.01	0	0			0.4	0.59	0.02		5.01			39.57	58.36	2.07		0.396
BR GIC 10b	segregation	felsic segregation in upper gabbro	Line 35	704			47.05		21.99	0.21		0.02	8.39	4.04	0.42			82.12		2.57	1.42	0	0.01	0	0			0.49	0.43	0.03		4.95			51.78	45.16	3.06		0.518
BR GIC 10b	segregation	felsic segregation in upper gabbro	Line 36	705			58.44		27.23	0.17		0	8.42	6.69	0.32	0.02		101.29		2.58	1.42	0	0.01	0	0			0.4	0.57	0.02		5			40.29	57.9	1.81		0.403
BR GIC 10b	segregation	felsic segregation in upper gabbro	Line 37	706			58.48	0.02	27.37	0.13			8.35	6.69	0.35			101.4		2.58	1.42	0	0	0	0			0.4	0.57	0.02		5			40	57.98	2.02		0.4
BR GIC 10b	segregation	felsic segregation in upper gabbro	Line 38	707			59.47	0.02	27.63	0.18		0.01	8.28	6.47	0.33			102.38		2.6	1.42	0	0.01	0	0			0.39	0.55	0.02		4.98			40.63	57.44	1.92		0.406
BR GIC 10b	segregation	felsic segregation in upper gabbro	Line 39	708			58.03	0.02	27.37	0.2			8.58	6.7	0.33			101.22		2.57	1.43	0	0.01	0	0			0.41	0.58	0.02		5.01			40.66	57.49	1.85		0.407
BR GIC 10b	segregation	felsic segregation in upper gabbro	Line 40	709			58.13		27.07	0.16		0.02	8.44	6.7	0.31			100.83		2.58	1.42	0	0.01	0	0			0.4	0.58	0.02		5.01			40.33	57.89	1.78		0.403
BR GIC 10b	segregation	felsic segregation in upper gabbro	Line 41	710			58.3	0.03	27.45	0.17			8.61	6.71	0.31			101.57		2.57	1.43	0	0.01	0	0			0.41	0.57	0.02		5.01			40.75	57.5	1.75		0.408
BR GIC 10b	segregation	felsic segregation in upper gabbro	Line 42	711			58.18		27.18	0.18			8.37	6.62	0.33			100.84		2.58	1.42	0	0.01	0	0			0.4	0.57	0.02		5			40.35	57.78	1.87		0.403
BR GIC 10b	segregation	felsic segregation in upper gabbro	Line 43	712			58.05	0.01	27.2	0.16		0	8.51	6.67	0.33			100.93		2.58	1.42	0	0.01	0	0			0.4	0.57	0.02		5.01			40.59	57.56	1.85		0.406
BR GIC 10b	segregation	felsic segregation in upper gabbro	Line 44	713			58.15	0.01	27.31	0.19		0.02	8.69	6.59	0.3	0.02		101.29		2.57	1.43	0	0.01	0	0			0.41	0.57	0.02		5			41.43	56.84	1.73		0.414
BR GIC 10b	segregation	felsic segregation in upper gabbro	Line 45	714			58.26	0.03	27.18	0.19	0.01		8.6	6.47	0.36			101.1		2.58	1.42	0	0.01	0	0			0.41	0.56	0.02		5			41.45	56.47	2.08		0.415
BR GIC 10b	segregation	felsic segregation in upper gabbro	Line 46	715			58.28	0	27.43	0.14			8.56	6.51	0.31	0.07		101.3		2.58	1.43	0	0.01	0	0			0.41	0.56	0.02		4.99			41.34	56.86	1.8		0.413
BR GIC 10b	segregation	felsic segregation in upper gabbro	Line 47	716			58.48	0.04	27.9	0.14	0.03		8.61	6.64	0.36	0.01		102.2		2.57	1.44	0	0.01	0	0			0.4	0.56	0.02		5			40.9	57.06	2.04		0.409
BR GIC 10b	segregation	felsic segregation in upper gabbro	Line 48	717			58.84	0.03	26.89	0.11		0.01	8.11	6.18	1.38			101.56		2.6	1.4	0	0	0	0			0.38	0.53	0.08		5			38.72	53.42	7.86		0.387
BR GIC 10b	segregation	felsic segregation in upper gabbro	Line 49	718			58.28	0	27.39	0.15		0.02	8.6	6.66	0.3			101.4		2.58	1.43	0	0.01	0	0			0.41	0.57	0.02		5			40.92	57.4	1.68		0.409
BR GIC 10b	segregation	felsic segregation in upper gabbro	Line 50	719			58.55	0.02	27.44	0.17	0	0	8.58	6.52	0.32			101.6		2.58	1.43	0	0.01	0	0			0.4	0.56	0.02		4.99			41.32	56.83	1.85		0.413
BR GIC 10b	segregation	felsic segregation in upper gabbro	Line 51	720			57.97		27.28	0.1		0.01	8.61	6.64	0.31			100.91		2.57	1.43	0	0	0	0			0.41	0.57	0.02		5.01			41.03	57.22	1.75		0.41
BR GIC 10b	segregation	felsic segregation in upper gabbro	Line 52	721			58.34	0.01	27.51	0.1		0.02	8.66	6.59	0.33			101.55		2.57	1.43	0	0	0	0			0.41	0.56	0.02		5			41.25	56.86	1.88		0.413
BR GIC 10b	segregation	felsic segregation in upper gabbro	Line 53	722			57.86	0	27.44	0.1			8.57	6.57	0.34			100.88		2.57	1.44	0	0	0	0			0.41	0.57	0.02		5			41.09	56.99	1.92		0.411
BR GIC 10b	segregation	felsic segregation in upper gabbro	Line 54	723			58.21	0.01	27.42	0.11	0.01		8.52	6.69	0.32			101.29		2.58	1.43	0	0	0	0			0.4	0.57	0.02		5.01			40.55	57.63	1.82		0.406
BR GIC 10b	segregation	felsic segregation in upper gabbro	Line 55	724			59.52	0.02	27.31	0.06	0.01		8.14	6.4	1.22	0.05		102.73		2.6	1.41	0	0	0	0			0.38	0.54	0.07		5			38.46	54.67	6.87		0.385
BR GIC 10b	segregation	felsic segregation in upper gabbro	Line 56	725			58.19	0.01	27.46	0.13		0.01	8.67	6.5	0.32			101.29		2.57	1.43	0	0	0	0			0.41	0.56	0.02		5			41.67	56.51	1.81		0.417
BR GIC 10b	segregation	felsic segregation in upper gabbro	Line 57	726			58.11	0.04	27.31	0.13			8.56	6.6	0.34			101.09		2.58	1.43	0	0	0	0			0.41	0.57	0.02		5			40.03	57.94	2.03		0.4
BR GIC 10b	segregation	felsic segregation in upper gabbro	Line 58	727			58.12	0.06	27.35	0.12			8.59	6.57	0.3	0.05		101.16		2.58	1.43	0	0	0	0			0.41	0.56	0.02		5			40.36	57.7	1.94		0.404
BR GIC 10b	segregation	felsic segregation in upper gabbro	Line 59	728			57.89	0.04	27.4	0.07		0	8.67	6.53	0.24	0.02		100.86		2.57	1.43	0	0	0	0			0.41	0.56	0.01		5			39.56	58.82	1.62		0.396
BR GIC 10b	segregation	felsic segregation in upper gabbro	Line 60	729			58.36		27.44	0.17			8.62	6.46	0.31	0.02		101.38		2.58	1.43	0	0.01	0	0			0.41	0.55	0.02		4.99			40.07	57.92	2.01		0.401
BR GIC 10b	segregation	felsic segregation in upper gabbro	Line 61	730			57.44	0.01	26.91	0.29	0.04	0.29	8.54	6.41	0.26	0.04		100.22		2.57	1.42	0	0.01	0	0.02			0.41	0.56	0.01		5			39.88	58.18	1.94		0.399
BR GIC 10b	segregation	felsic segregation in upper gabbro	Line 62	731			58.16	0.03	27.36	0.18	0.05	0.01	8.68	6.66	0.3	0		101.43		2.57	1.43	0	0.01	0	0			0.41	0.57	0.02		5.01			39.57	58.36	2.07		0.396
BR GIC 10b	segregation	felsic segregation in upper gabbro	Line 63	732			58.01	0.07	27.35	0.09		0.01	8.78	6.5	0.24			101.05		2.57	1.43	0	0	0	0			0.42	0.56	0.01		5			51.78	45.16	3.06		0.518
BR GIC 10b	segregation	felsic segregation in upper gabbro	Line 64	733			58.33	0.05	27.62	0.11		0.01	8.57	6.53	0.29	0.02		101.54		2.57	1.44	0	0	0	0			0.41	0.56	0.02		5			40.29	57.9	1.81		0.403
BR GIC 10b	segregation	felsic segregation in upper gabbro	Line 65	734			56.18	0	26.08	0.11	0.02	0.01	8	6.29	0.67	0.02		97.37		2.59	1.42	0	0	0	0			0.39	0.56	0.04		5			40	57.98	2.02		0.4
BR GIC 10b	segregation	felsic segregation in upper gabbro	Line 66	735			57.89	0.04	27.36	0.16	0.02		8.74	6.46	0.25			100.93		2.57	1.43	0	0.01	0	0			0.42	0.56	0.01		5			40.63	57.44	1.92		0.406
BR GIC 10b	segregation	felsic segregation in upper gabbro	Line 67	736			58.07	0.05	27.39	0.12		0.02	8.75	6.53	0.31	0.01		101.25		2.57	1.43	0	0	0	0			0.42	0.56	0.02		5			40.66	57.49	1.85		0.407
BR GIC 10b	segregation	felsic segregation in upper gabbro	Line 68	737			58.13		27.3	0.1			8.58	6.54	0.37	0.01		101.03		2.58	1.43	0	0	0	0			0.41	0.56	0.02		5			40.33	57.89	1.78		0.403
BR GIC 10b	segregation	felsic segregation in upper gabbro	Line 69	738			57.72	0.02	27.45	0.15		0.02	8.76	6.6	0.29	0.01		101.03		2.56	1.44	0	0.01	0	0			0.42	0.57	0.02		5.01			40.75	57.5	1.75		0.408
BR GIC 10b	segregation	felsic segregation in upper gabbro	Line 70	739			57.55	0.03	27.4	0.12			8.67	6.62	0.31			100.69		2.56	1.44	0	0	0	0			0.41	0.57	0.02		5.01			40.35	57.78	1.87		0.403
BR GIC 10b	segregation	felsic segregation in upper gabbro	Line 71	740			58.18	0.06	27.63	0.16	0.02		8.84	6.49	0.24			101.61		2.57	1.44	0	0.01	0	0			0.42	0.56	0.01		5			40.59	57.56	1.85		0.406
BR GIC 10b	segregation	felsic segregation in upper gabbro	Line 72	741			58.02	0.03	27.25	0.12			8.77	6.5	0.31			101		2.57	1.43	0	0	0	0			0.42	0.56	0.02		5			41.43	56.84	1.73		0.414
BR GIC 10b	segregation	felsic segregation in upper gabbro	Line 73	742			58.33		27.48	0.18	0.03		8.73	6.63	0.3	0.04		101.71		2.57	1.43	0	0.01	0	0			0.41	0.57	0.02		5			41.45	56.47	2.08		0.415
BR GIC 10b	segregation	felsic segregation in upper gabbro	Line 74	743			57.89		27.53	0.19	0.01	0	8.72	6.64	0.29	0.02		101.28		2.56	1.44	0	0.01	0	0			0.41	0.57	0.02		5.01			41.34	56.86	1.8		0.413
BR GIC 10b	segregation	felsic segregation in upper gabbro	Line 75	744			57.95	0.04	27.32	0.14	0	0.01	8.66	6.75	0.3	0.01		101.17		2.57	1.43	0	0.01	0	0			0.41	0.58	0.02		5.01			40.9	57.06	2.04		0.409
BR GIC 10b	segregation	felsic segregation in upper gabbro	Line 76	745			57.77	0.01	27.26	0.1	0.01	0	8.79	6.52	0.31	0.04		100.81		2.57	1.43	0	0	0	0			0.42	0.56	0.02		5			38.72	53.42	7.86		0.387
BR GIC 10b	segregation	felsic segregation in upper gabbro	Line 77	746			57.83	0.01	27.57	0.13		0	8.63	6.46	0.34			100.98		2.57	1.44	0	0	0	0			0.41	0.56	0.02		5			40.92	57.4	1.68		0.409
BR GIC 10b	segregation	felsic segregation in upper gabbro	Line 78	747			57.94	0.02	27.29	0.18	0.02	0	8.56	6.58	0.3			100.9		2.57	1.43	0	0.01	0	0			0.41	0.57	0.02		5			41.32	56.83	1.85		0.413
BR GIC 10b	segregation	felsic segregation in upper gabbro	Line 79	748			57.95	0.1	27.2	0.15	0.01		8.68	6.52	0.26			100.87		2.57	1.42	0	0.01	0	0			0.41	0.56	0.01		5			41.03	57.22	1.75		0.41
BR GIC 10b	segregation	felsic segregation in upper gabbro	Line 80	749			57.87		27.35	0.17			8.63	6.49	0.36			100.85		2.57	1.43	0	0.01	0	0			0.41	0.56	0.02		5			41.25	56.86	1.88		0.413
BR GIC 10b	segregation	felsic segregation in upper gabbro	Line 81	750			58.36	0.03	27.49	0.15		0.01	8.56	6.37	0.31	0.02		101.31		2.58	1.43	0	0.01	0	0			0.41	0.55	0.02		4.99			41.09	56.99	1.92		0.411
BR GIC 10b	segregation	felsic segregation in upper gabbro	Line 82	751			58.05		27.62	0.14	0.01		8.71	6.49	0.3			101.33		2.57	1.44	0	0.01	0	0			0.41	0.56	0.02		5			40.55	57.63	1.82		0.406
BR GIC 10b	segregation	felsic segregation in upper gabbro	Line 83	752			57.81	0.06	27.62	0.08	0.01	0.01	8.77	6.71	0.25			101.3		2.56	1.44	0	0	0	0			0.42	0.58	0.01		5.01			38.46	54.67	6.87		0.385
BR GIC 10b	segregation	felsic segregation in upper gabbro	Line 84	753			58	0.06	27.62	0.16		0	8.63	6.59	0.25			101.3		2.57	1.44	0	0.01	0	0			0.41	0.57	0.01		5			41.67	56.51	1.81		0.417
BR GIC 10b	segregation	felsic segregation in upper gabbro	Line 85	754			57.5	0	27.32	0.1	0.03	0.01	8.65	6.54	0.3	0.02		100.46		2.57	1.44	0	0	0	0			0.41	0.57	0.02		5.01			40.94	57.1	1.96		0.409
BR GIC 10b	segregation	felsic segregation in upper gabbro	Line 86	755			57.79	0.03	27.3	0.11	0.05	0.01	8.63	6.69	0.27	0.04		100.91		2.57	1.43	0	0	0	0			0.41	0.58	0.02		5.01			41.24	57.08	1.69		0.412
BR GIC 10b	segregation	felsic segregation in upper gabbro	Line 87	756			58.05	0.01	27.36	0.09		0.01	8.54	6.64	0.29	0.05		101.03		2.58	1.43	0	0	0	0			0.41	0.57	0.02		5			41.76	56.88	1.37		0.418
BR GIC 10b	segregation	felsic segregation in upper gabbro	Line 88	757			57.98		27.48	0.08		0.02	8.68	6.49	0.27	0		101		2.57	1.44	0	0	0	0			0.41	0.56	0.02		5			41.7	56.54	1.76		0.417
BR GIC 10b	segregation	felsic segregation in upper gabbro	Line 89	758			57.52	0.03	27.59	0.12			8.81	6.51	0.31			100.9		2.56	1.45	0	0	0	0			0.42	0.56	0.02		5.01			41.78	56.71	1.5		0.418
BR GIC 10b	segregation	felsic segregation in upper gabbro	Line 90	759			57.89	0	27.66	0.14			8.67	6.69	0.27			101.33		2.56	1.44	0	0.01	0	0			0.41	0.57	0.02		5.01			41.12	57.16	1.72		0.411
BR GIC 10b	segregation	felsic segregation in upper gabbro	Line 91	760			58	0.05	27.4	0.14			8.63	6.67	0.24	0.01		101.14		2.57	1.43	0	0.01	0	0			0.41	0.57	0.01		5.01			42.16	56.5	1.35		0.422
BR GIC 10b	segregation	felsic segregation in upper gabbro	Line 92	761			57.1	0.02	27.04	0.11	0	0	8.46	6.69	0.23			99.65		2.57	1.43	0	0	0	0			0.41	0.58	0.01		5.01			41.35	57	1.65		0.413
BR GIC 10b	segregation	felsic segregation in upper gabbro	Line 93	762			58.26	0.01	27.4				8.45	6.8	0.13	0.01		101.05		2.58	1.43	0	0	0	0			0.4	0.58	0.01		5			39.66	56.38	3.95		0.397
BR GIC 10b	segregation	felsic segregation in upper gabbro	Line 94	763			58.2		27.06	0.05	0		8.24	6.77	0.22			100.53		2.59	1.42	0	0	0	0			0.39	0.58	0.01		5			42.15	56.42	1.44		0.421
BR GIC 10b	segregation	felsic segregation in upper gabbro	Line 95	764			58.89	0.03	26.69	0.06		0.02	7.82	7.03	0.24			100.77		2.61	1.39	0	0	0	0			0.37	0.6	0.01		5			41.79	56.44	1.77		0.418
BR GIC 10b	segregation	felsic segregation in upper gabbro	Line 96	765			60.78	0.07	25.26	0.09			6.48	7.89	0.3			100.87		2.68	1.31	0	0	0	0			0.31	0.68	0.02		5			41.14	56.74	2.12		0.411
BR GIC 10b	segregation	felsic segregation in upper gabbro	Line 97	766			62.64	0.06	24.22	0.1	0		5.25	8.5	0.42			101.18		2.75	1.25	0	0	0	0			0.25	0.72	0.02		5			41.61	56.75	1.64		0.416
BR GIC 10b	segregation	felsic segregation in upper gabbro	Line 98	767			62.93	0.03	23.88	0.08	0		4.73	8.77	0.44			100.86		2.77	1.24	0	0	0	0			0.22	0.75	0.02		5			41.25	57.02	1.73		0.412
BR GIC 10b	segregation	felsic segregation in upper gabbro	Line 99	768			63.09		24.1	0.09		0.02	4.83	8.78	0.37			101.29		2.76	1.24	0	0	0	0			0.23	0.74	0.02		5			42.36	56.26	1.38		0.424
BR GIC 10b	segregation	felsic segregation in upper gabbro	Line 100	769			62.82	0.01	24.02	0.1	0		4.68	8.75	0.32	0.06		100.74		2.76	1.25	0	0	0	0			0.22	0.75	0.02		5			41.96	56.25	1.79		0.42
BR GIC 10b	segregation	felsic segregation in upper gabbro	Line 1p	770			62.95	0.05	24.04	0.1		0.02	4.81	8.65	0.52			101.13		2.76	1.24	0	0	0	0			0.23	0.74	0.03		5			41.43	56.89	1.68		0.414
BR GIC 10b	segregation	felsic segregation in upper gabbro	Line 2p	771			61.86	0.01	24.47	0.09	0.01	0.01	5.3	8.38	0.47			100.6		2.73	1.27	0	0	0	0			0.25	0.72	0.03		5			41.36	57.01	1.63		0.414
BR GIC 10b	segregation	felsic segregation in upper gabbro	Line 3p	772			62.31		24.4	0.13	0		5.05	8.48	0.53			100.9		2.74	1.27	0	0	0	0			0.24	0.72	0.03		5			40.77	57.55	1.68		0.408
BR GIC 10b	segregation	felsic segregation in upper gabbro	Line 4p	773			61.24		23.94	0.12	0.05	0.01	5.04	8.16	0.43			98.98		2.74	1.26	0	0	0	0			0.24	0.71	0.02		4.99			41.93	56.29	1.78		0.419
BR GIC 10b	segregation	felsic segregation in upper gabbro	Line 5p	774			62.24		24.63	0.14	0.01	0.01	5.33	8.44	0.48	0.01		101.28		2.73	1.27	0	0	0	0			0.25	0.72	0.03		5.01			41.66	56.4	1.94		0.417
BR GIC 10b	segregation	felsic segregation in upper gabbro	Line 6p	775			63.38	0.04	19.09	0.02	0.02		0.1	0.45	16.11	0.06		99.28		2.96	1.05	0	0	0	0			0	0.04	0.96		5.02			41.09	57.17	1.74		0.411
BR GIC 10b	segregation	felsic segregation in upper gabbro	Line 7p	776			62.5		24.32	0.13			5.02	8.51	0.5			100.98		2.75	1.26	0	0	0	0			0.24	0.72	0.03		5			41.74	56.75	1.51		0.417
BR GIC 10b	segregation	felsic segregation in upper gabbro	Line 8p	777			62.87		24.4	0.12			5.25	8.34	0.44	0.01		101.43		2.75	1.26	0	0	0	0			0.25	0.71	0.02		4.99			41.49	56.45	2.06		0.415
BR GIC 10b	segregation	felsic segregation in upper gabbro	Line 9p	778			62.41	0.02	24.44	0.1			5.11	8.43	0.42	0.02		100.94		2.74	1.27	0	0	0	0			0.24	0.72	0.02		4.99			41.83	56.35	1.82		0.418
BR GIC 10b	segregation	felsic segregation in upper gabbro	Line 10	779			62.15	0.01	24.49	0.11	0.01	0.01	5.37	8.38	0.39	0.06		100.96		2.73	1.27	0	0	0	0			0.25	0.72	0.02		5			41.85	56.41	1.74		0.419
BR GIC 10b	segregation	felsic segregation in upper gabbro	Line 11	780			59.51	0.04	26.73	0.08			7.78	7.21	0.33	0.01		101.68		2.62	1.39	0	0	0	0			0.37	0.61	0.02		5.01			41.38	57.23	1.39		0.414
BR GIC 10b	segregation	felsic segregation in upper gabbro	Line 12	781			58.74	0.01	26.81	0.09	0		8.09	6.79	0.28	0.05		100.87		2.6	1.4	0	0	0	0			0.38	0.58	0.02		4.99			41.39	57.2	1.41		0.414
BR GIC 10b	segregation	felsic segregation in upper gabbro	Line 13	782			57.48		25.72	0.11	0.01	0	7.25	6.56	0.32			97.46		2.63	1.39	0	0	0	0			0.36	0.58	0.02		4.98			41.52	56.78	1.7		0.415
BR GIC 10b	segregation	felsic segregation in upper gabbro	Line 14	783			58.2	0.02	27.18	0.1	0.02	0.02	8.19	6.68	0.3			100.71		2.59	1.42	0	0	0	0			0.39	0.58	0.02		5			40.97	57.5	1.53		0.41
BR GIC 10b	segregation	felsic segregation in upper gabbro	Line 15	784			58.69		27.01	0.16			8.33	6.7	0.31			101.19		2.6	1.41	0	0.01	0	0			0.39	0.57	0.02		5			40.87	57.5	1.63		0.409
BR GIC 10b	segregation	felsic segregation in upper gabbro	Line 16	785			58.41	0.08	27.08	0.13	0.02	0.02	8.36	6.73	0.28	0.04		101.15		2.59	1.41	0	0	0	0			0.4	0.58	0.02		5			41.85	56.61	1.54		0.418
BR GIC 10b	segregation	felsic segregation in upper gabbro	Line 17	786			58.54		27.14	0.1	0.01		8.28	6.7	0.31			101.07		2.59	1.42	0	0	0	0			0.39	0.57	0.02		5			42.03	56.21	1.77		0.42
BR GIC 10b	segregation	felsic segregation in upper gabbro	Line 18	787			58.28		27.2	0.13	0.02	0.01	8.3	6.77	0.35	0.02		101.08		2.58	1.42	0	0	0	0			0.39	0.58	0.02		5.01			41.11	57.34	1.55		0.411
BR GIC 10b	segregation	felsic segregation in upper gabbro	Line 19	788			58.56		27.1	0.13		0	8.28	6.9	0.32	0.01		101.3		2.59	1.41	0	0	0	0			0.39	0.59	0.02		5.01			41.14	57.49	1.37		0.411
BR GIC 10b	segregation	felsic segregation in upper gabbro	Line 20	789			58.39	0.01	26.98	0.17	0.01	0	8.34	6.71	0.3			100.92		2.59	1.41	0	0.01	0	0			0.4	0.58	0.02		5			40.59	58.12	1.3		0.406
BR GIC 10b	segregation	felsic segregation in upper gabbro	Line 21	790			58.51	0.06	27.22	0.16	0	0.01	8.31	6.69	0.32	0.01		101.3		2.59	1.42	0	0.01	0	0			0.39	0.57	0.02		5			40.43	58.84	0.72		0.404
BR GIC 10b	segregation	felsic segregation in upper gabbro	Line 22	791			58.2		27.09	0.13	0.05		8.38	6.75	0.35	0		100.96		2.58	1.42	0	0	0	0			0.4	0.58	0.02		5.01			39.7	59.07	1.23		0.397
BR GIC 10b	segregation	felsic segregation in upper gabbro	Line 23	792			57.09	0.03	26.07	0.46	0.01	0.27	7.7	6.42	0.42	0.07		98.54		2.6	1.4	0	0.02	0	0.02			0.38	0.57	0.02		5			37.56	61.08	1.36		0.376
BR GIC 10b	segregation	felsic segregation in upper gabbro	Line 24	793			58.1		27.13	0.09	0.02		8.17	6.61	0.4			100.51		2.59	1.42	0	0	0	0			0.39	0.57	0.02		5			30.68	67.63	1.69		0.307
BR GIC 10b	segregation	felsic segregation in upper gabbro	Line 25	794			58.21	0.03	27.19	0.16	0.02		8.28	6.75	0.31			100.94		2.58	1.42	0	0.01	0	0			0.39	0.58	0.02		5			24.82	72.83	2.34		0.248
BR GIC 10b	segregation	felsic segregation in upper gabbro	Line 26	795			58.5	0.05	27.2	0.16		0.01	8.45	6.76	0.31			101.45		2.58	1.42	0	0.01	0	0			0.4	0.58	0.02		5			22.39	75.12	2.49		0.224
BR GIC 10b	segregation	felsic segregation in upper gabbro	Line 27	796			58.58		27.22	0.16	0.01		8.38	6.7	0.32	0.03		101.4		2.59	1.42	0	0.01	0	0			0.4	0.57	0.02		5			22.83	75.07	2.1		0.228
BR GIC 10b	segregation	felsic segregation in upper gabbro	Line 28	797			58.7	0.04	27.07	0.46			8.29	6.86	0.34	0.03		101.79		2.59	1.41	0	0.02	0	0			0.39	0.59	0.02		5.01			22.39	75.79	1.81		0.224
BR GIC 10b	segregation	felsic segregation in upper gabbro	Line 29	798			58.46		27.08	0.17		0.01	8.21	6.82	0.31			101.07		2.59	1.41	0	0.01	0	0			0.39	0.59	0.02		5			22.8	74.29	2.91		0.228
BR GIC 10b	segregation	felsic segregation in upper gabbro	Line 30	799			58.59		27.25	0.12		0	8.4	6.74	0.32			101.42		2.59	1.42	0	0	0	0			0.4	0.58	0.02		5			25.19	72.13	2.68		0.252
BR GIC 10b	segregation	felsic segregation in upper gabbro	Line 32	800			51.01	0.05	22.43	0.16			6.4	6.24	0.35	0.02		86.67		2.63	1.36	0	0.01	0	0			0.35	0.62	0.02		5.01			24.02	73	2.98		0.24
BR GIC 10b	segregation	felsic segregation in upper gabbro	Line 32	801			58.53	0.01	27.02	0.17	0.01	0.01	8.12	6.8	0.46			101.13		2.59	1.41	0	0.01	0	0			0.39	0.58	0.03		5.01			24.79	72.72	2.49		0.248
BR GIC 10b	segregation	felsic segregation in upper gabbro	Line 33	802			58.64		27.35	0.16	0.01	0.01	8.29	6.7	0.33	0		101.5		2.59	1.42	0	0.01	0	0			0.39	0.57	0.02		5			25.18	72.15	2.68		0.252
BR GIC 10b	segregation	felsic segregation in upper gabbro	Line 34	803			58.6	0.01	27.19	0.17			8.37	6.67	0.31			101.32		2.59	1.42	0	0.01	0	0			0.4	0.57	0.02		5			0.48	4.07	95.45		0.005
BR GIC 10b	segregation	felsic segregation in upper gabbro	Line 35	804			58.49	0.01	26.91	0.16			8.07	6.72	0.3			100.66		2.6	1.41	0	0.01	0	0			0.38	0.58	0.02		4.99			23.91	73.28	2.81		0.239
BR GIC 10b	segregation	felsic segregation in upper gabbro	Line 36	805			58.23		26.9	0.14		0.02	8.05	6.77	0.32	0.08		100.5		2.59	1.41	0	0.01	0	0			0.38	0.58	0.02		5			25.15	72.35	2.49		0.252
BR GIC 10b	segregation	felsic segregation in upper gabbro	Line 37	806			59.01	0.02	26.19	0.12			7.57	6.58	0.95			100.45		2.63	1.38	0	0	0	0			0.36	0.57	0.05		4.99			24.5	73.13	2.37		0.245
BR GIC 10b	segregation	felsic segregation in upper gabbro	Line 38	807			59.26	0.06	26.51	0.12		0.02	7.69	6.39	1.5			101.54		2.62	1.38	0	0	0	0			0.36	0.55	0.08		5			25.56	72.25	2.19		0.256
BR GIC 10b	segregation	felsic segregation in upper gabbro	Line 39	808			59	0.01	27.04	0.14	0.01		7.97	6.91	0.3			101.39		2.6	1.41	0	0.01	0	0			0.38	0.59	0.02		5			36.67	61.5	1.82		0.367
BR GIC 10b	segregation	felsic segregation in upper gabbro	Line 40	809			60.54		28.07	0.1			8.1	6.82	0.26	0.01		103.89		2.6	1.42	0	0	0	0			0.37	0.57	0.01		4.98			39.09	59.33	1.58		0.391
BR GIC 10b	segregation	felsic segregation in upper gabbro	Line 41	810			58.56	0.03	27.1	0.14			8.19	6.76	0.26			101.04		2.59	1.41	0	0.01	0	0			0.39	0.58	0.01		5			37.18	60.87	1.95		0.372
BR GIC 10b	segregation	felsic segregation in upper gabbro	Line 42	811			58.66	0.02	26.98	0.16		0.02	8.35	6.67	0.3	0.02		101.18		2.6	1.41	0	0.01	0	0			0.4	0.57	0.02		5			39.72	58.57	1.7		0.397
BR GIC 10b	segregation	felsic segregation in upper gabbro	Line 43	812			58.39	0.03	27.08	0.14	0		8.33	6.86	0.31	0.04		101.17		2.59	1.41	0	0.01	0	0			0.4	0.59	0.02		5.01			40.02	58.23	1.75		0.4
BR GIC 10b	segregation	felsic segregation in upper gabbro	Line 44	813			58.55	0.02	27.03	0.22			8.29	6.93	0.33			101.36		2.59	1.41	0	0.01	0	0			0.39	0.59	0.02		5.01			40.07	58.36	1.57		0.401
BR GIC 10b	segregation	felsic segregation in upper gabbro	Line 45	814			43.27	0.18	18.42	0.13	0.02	0.03	5.63	5.14	0.34			73.16		2.65	1.33	0.01	0.01	0	0			0.37	0.61	0.03		5			39.85	58.37	1.78		0.399
BR GIC 10b	segregation	felsic segregation in upper gabbro	Line 46	815			58.79	0.01	27.01	0.15			8.15	6.85	0.32	0.07		101.35		2.6	1.41	0	0.01	0	0			0.39	0.59	0.02		5			39.61	58.43	1.97		0.396
BR GIC 10b	segregation	felsic segregation in upper gabbro	Line 47	816			58.77	0.03	27.11	0.22			8.09	6.93	0.35			101.5		2.59	1.41	0	0.01	0	0			0.38	0.59	0.02		5.01			39.15	59.04	1.8		0.392
BR GIC 10b	segregation	felsic segregation in upper gabbro	Line 48	817			59.14	0.08	26.55	0.17	0	0.01	7.72	7.11	0.37	0.06		101.2		2.62	1.38	0	0.01	0	0			0.37	0.61	0.02		5.01			40.01	58.28	1.71		0.4
BR GIC 10b	segregation	felsic segregation in upper gabbro	Line 49	818			58.93	0.02	26.01	0.19		0.02	7.24	7.33	0.43	0		100.16		2.63	1.37	0	0.01	0	0			0.35	0.63	0.02		5.01			39.93	58.23	1.84		0.399
BR GIC 10b	segregation	felsic segregation in upper gabbro	Line 50	819			59.88		26.06	0.24	0.01	0.02	7.3	7.46	0.34	0.04		101.35		2.64	1.36	0	0.01	0	0			0.35	0.64	0.02		5.01			39.89	58.16	1.96		0.399
BR GIC 10b	segregation	felsic segregation in upper gabbro	Line 51	820			60.7		25.14	0.14	0.01		6.3	7.92	0.44	0.06		100.71		2.69	1.31	0	0.01	0	0			0.3	0.68	0.02		5.01			38.87	58.62	2.51		0.389
BR GIC 10b	segregation	felsic segregation in upper gabbro	Line 52	821			62.6	0.02	24.3	0.2			5.28	8.37	0.5			101.27		2.74	1.26	0	0.01	0	0			0.25	0.71	0.03		5			39.62	58.06	2.32		0.396
BR GIC 10b	segregation	felsic segregation in upper gabbro	Line 53	822			62.33	0.03	23.74	0.19	0.02	0.03	4.86	8.47	0.58	0.02		100.28		2.76	1.24	0	0.01	0	0			0.23	0.73	0.03		5			39.7	58.55	1.75		0.397
BR GIC 10b	segregation	felsic segregation in upper gabbro	Line 54	823			62.25	0.03	24.39	0.12	0.01		5.18	8.32	0.48			100.77		2.74	1.27	0	0	0	0			0.24	0.71	0.03		4.99			40.12	58.12	1.75		0.401
BR GIC 10b	segregation	felsic segregation in upper gabbro	Line 55	824			62.89		24.13	0.19		0.03	5.04	9.41	0.51			102.2		2.74	1.24	0	0.01	0	0			0.24	0.8	0.03		5.05			40.14	58.03	1.82		0.401
BR GIC 10b	segregation	felsic segregation in upper gabbro	Line 56	825			63.67		18.8	0.07	0.05		0.11	0.41	16.59	0.02		99.71		2.97	1.03	0	0	0	0			0.01	0.04	0.99		5.03			39.26	58.85	1.89		0.393
BR GIC 10b	segregation	felsic segregation in upper gabbro	Line 57	826			62.77	0	24.08	0.13		0.01	4.92	8.52	0.48	0		100.93		2.76	1.25	0	0	0	0			0.23	0.73	0.03		4.99			39.21	59.01	1.79		0.392
BR GIC 10b	segregation	felsic segregation in upper gabbro	Line 58	827			63.14	0.05	23.82	0.19			4.78	8.72	0.43			101.13		2.77	1.23	0	0.01	0	0			0.22	0.74	0.02		5			40.06	58.12	1.83		0.401
BR GIC 10b	segregation	felsic segregation in upper gabbro	Line 59	828			62.89	0	24.1	0.18	0.03		4.85	8.44	0.53			101.02		2.76	1.25	0	0.01	0	0			0.23	0.72	0.03		4.99			35.36	62.37	2.27		0.354
BR GIC 10b	segregation	felsic segregation in upper gabbro	Line 60	829			62.75	0.03	23.97	0.2	0	0.01	4.91	8.62	0.49	0.02		101.01		2.76	1.24	0	0.01	0	0			0.23	0.73	0.03		5			38.72	58.66	2.62		0.387
BR GIC 10b	segregation	felsic segregation in upper gabbro	Line 61	830			62.86		23.82	0.19	0.01	0.02	4.88	8.67	0.47			100.92		2.76	1.23	0	0.01	0	0			0.23	0.74	0.03		5			39.82	58.29	1.89		0.398
BR GIC 10b	segregation	felsic segregation in upper gabbro	Line 62	831			64.71		19.05	0.03			0.04	0.4	16.73			100.96		2.97	1.03	0	0	0	0			0	0.04	0.98		5.02			40.22	58	1.78		0.402
BR GIC 10b	segregation	felsic segregation in upper gabbro	Line 63	832			62.67	0.06	24.42	0.12			5.2	8.33	0.54			101.33		2.74	1.26	0	0	0	0			0.24	0.71	0.03		4.99			39.19	59.08	1.73		0.392
BR GIC 10b	segregation	felsic segregation in upper gabbro	Line 64	833			60.11	0	23.36	0.19	0.04	0.01	5.17	8.15	0.4			97.43		2.74	1.26	0	0.01	0	0			0.25	0.72	0.02		5			38.92	59.23	1.85		0.389
BR GIC 10b	segregation	felsic segregation in upper gabbro	Line 65	834			64.34	0.01	19.42	0.05	0		0.42	0.85	15.72			100.81		2.95	1.05	0	0	0	0			0.02	0.08	0.92		5.02			36.71	57.79	5.51		0.367
BR GIC 10b	segregation	felsic segregation in upper gabbro	Line 66	835			62.76	0	24.08	0.09	0.01	0	4.96	8.48	0.37			100.75		2.76	1.25	0	0	0	0			0.23	0.72	0.02		4.99			36.54	54.94	8.52		0.365
BR GIC 10b	segregation	felsic segregation in upper gabbro	Line 67	836			63.24	0	23.81	0.17		0.01	4.56	8.83	0.48	0.04		101.14		2.77	1.23	0	0.01	0	0			0.21	0.75	0.03		5			38.24	60.02	1.74		0.382
BR GIC 10b	segregation	felsic segregation in upper gabbro	Line 68	837			65.1	0.04	18.97	0.03	0.02		0.02	0.48	17.01			101.67		2.97	1.02	0	0	0	0			0	0.04	0.99		5.03			39.04	59.49	1.46		0.39
BR GIC 10b	segregation	felsic segregation in upper gabbro	Line 69	838			62.99		23.88	0.15			4.65	8.73	0.47	0.02		100.88		2.77	1.24	0	0.01	0	0			0.22	0.74	0.03		5			39.47	59.01	1.52		0.395
BR GIC 10b	segregation	felsic segregation in upper gabbro	Line 70	839			63.76	0.06	23.75	0.1		0.01	4.49	8.81	0.43			101.41		2.78	1.22	0	0	0	0			0.21	0.75	0.02		4.99			40.18	58.1	1.72		0.402
BR GIC 10b	segregation	felsic segregation in upper gabbro	Line 71	840			63.13	0.07	23.72	0.12		0.01	4.57	9.06	0.41	0.03		101.11		2.77	1.23	0	0	0	0			0.21	0.77	0.02		5.01			39.47	58.8	1.73		0.395
BR GIC 10b	segregation	felsic segregation in upper gabbro	Line 72	841			63.78	0.05	23.73	0.1		0.01	4.39	8.86	0.45			101.36		2.78	1.22	0	0	0	0			0.21	0.75	0.03		4.99			39.04	59.12	1.84		0.39
BR GIC 10b	segregation	felsic segregation in upper gabbro	Line 73	842			63.42	0.01	23.84	0.14	0.03		4.49	8.89	0.39			101.2		2.78	1.23	0	0.01	0	0			0.21	0.75	0.02		5			36.68	60.7	2.62		0.367
BR GIC 10b	segregation	felsic segregation in upper gabbro	Line 74	843			63.9	0.03	23.84	0.16	0.03		4.54	8.92	0.45	0.02		101.89		2.78	1.22	0	0.01	0	0			0.21	0.75	0.03		5			38.95	59.24	1.81		0.389
BR GIC 10b	segregation	felsic segregation in upper gabbro	Line 75	844			63.49	0.03	23.75	0.13	0		4.57	8.89	0.52			101.38		2.78	1.22	0	0	0	0			0.21	0.75	0.03		5			38.44	59.61	1.96		0.384
BR GIC 10b	segregation	felsic segregation in upper gabbro	Line 76	845			64.22		23.89	0.08	0.01		4.44	9.18	0.5	0.02		102.33		2.78	1.22	0	0	0	0			0.21	0.77	0.03		5.01			36.72	61.19	2.09		0.367
BR GIC 10b	segregation	felsic segregation in upper gabbro	Line 77	846			63.07		23.84	0.15		0.01	4.55	9.02	0.5			101.14		2.77	1.23	0	0.01	0	0			0.21	0.77	0.03		5.01			34.47	63.12	2.41		0.345
BR GIC 10b	segregation	felsic segregation in upper gabbro	Line 78	847			63.69		23.43	0.14			4.28	8.91	0.56	0.07		101.07		2.79	1.21	0	0.01	0	0			0.2	0.76	0.03		5			34.44	63.64	1.91		0.344
BR GIC 10b	segregation	felsic segregation in upper gabbro	Line 79	848			64.47		23.5	0.1			4.05	9.17	0.58			101.87		2.8	1.2	0	0	0	0			0.19	0.77	0.03		5			29.79	67.73	2.48		0.298
BR GIC 10b	segregation	felsic segregation in upper gabbro	10b6 1	447			FSP	0.02	24.22	0.07	0.01		5.08	8.73	0.26	0.06		100.62		2.74	1.26	0	0	0	0	0		0.24	0.75	0.01		5.01			25.13	72.03	2.85		0.251
BR GIC 10b	segregation	felsic segregation in upper gabbro	10b6 2	448			61.66		24.77	0.08			5.47	8.5	0.31			100.78		2.72	1.29	0	0	0	0	0		0.26	0.73	0.02		5.01			23.29	73.39	3.32		0.233
BR GIC 10b	segregation	felsic segregation in upper gabbro	10b6 3	449			57.9		27.19	0.08	0.01		8.45	6.74	0.17			100.53		2.58	1.43	0	0	0	0	0		0.4	0.58	0.01		5			24.87	72.37	2.75		0.249
BR GIC 10b	segregation	felsic segregation in upper gabbro	10b6 4	450			62.71		23.93	0.1	0.02		4.65	8.7	0.32			100.43		2.76	1.24	0	0	0	0	0		0.22	0.74	0.02		4.99			22.22	75.09	2.69		0.222
BR GIC 10b	segregation	felsic segregation in upper gabbro	10b6 5	451			60.28	0.03	25.53	0.05		0.03	6.53	7.79	0.28			100.52		2.67	1.33	0	0	0	0	0		0.31	0.67	0.02		5			0.53	3.58	95.88		0.005
BR GIC 10b	segregation	felsic segregation in upper gabbro	10b6 6	452			61.91	0.04	24.32	0.07	0.03	0	5.1	8.44	0.31	0.04		100.24		2.74	1.27	0	0	0	0	0		0.24	0.72	0.02		5			23.53	73.74	2.72		0.235
BR GIC 10b	segregation	felsic segregation in upper gabbro	10b6 7	453			61.29	0.02	25.13	0.08	0.01	0.02	5.96	8.29	0.3			101.1		2.7	1.3	0	0	0	0	0		0.28	0.71	0.02		5.01			22.67	74.89	2.44		0.227
BR GIC 10b	segregation	felsic segregation in upper gabbro	10b6 8	454			61.18	0.02	25.07	0.04	0		5.91	8.12	0.32	0.04		100.69		2.7	1.3	0	0	0	0	0		0.28	0.69	0.02		5			23.37	73.59	3.04		0.234
BR GIC 10b	segregation	felsic segregation in upper gabbro	10b6 9	455			61.08		24.93	0.08	0	0	5.84	8.2	0.28	0.02		100.42		2.7	1.3	0	0	0	0	0		0.28	0.7	0.02		5			23.26	73.97	2.78		0.233
BR GIC 10b	segregation	felsic segregation in upper gabbro	10b6 10	456			61.39	0.04	24.69	0.06	0.02		5.68	8.28	0.26			100.42		2.72	1.29	0	0	0	0	0		0.27	0.71	0.01		5			23.1	74.25	2.65		0.231
BR GIC 10b	segregation	felsic segregation in upper gabbro	10b8 1	467			59.97		25.88	0.14		0.02	6.76	7.8	0.19	0.01		100.76		2.65	1.35	0	0.01	0	0	0		0.32	0.67	0.01		5.01			0.19	3.51	96.3		0.002
BR GIC 10b	segregation	felsic segregation in upper gabbro	10b8 2	468			57.31	0.01	27.58	0.12	0.02		9.01	6.49	0.19	0.06		100.78		2.55	1.45	0	0	0	0	0		0.43	0.56	0.01		5.01			24.85	72.07	3.08		0.248
BR GIC 10b	segregation	felsic segregation in upper gabbro	10b8 3	469			59.17	0.01	26.14	0.11	0.03	0.01	7.42	7.36	0.17			100.42		2.63	1.37	0	0	0	0	0		0.35	0.63	0.01		5.01			25.33	72.35	2.31		0.253
BR GIC 10b	segregation	felsic segregation in upper gabbro	10b8 4	470			55.98		28.42	0.1		0.01	9.73	5.83	0.19	0.04		100.29		2.51	1.5	0	0	0	0	0		0.47	0.51	0.01		5			2.02	7.41	90.58		0.02
BR GIC 10b	segregation	felsic segregation in upper gabbro	10b8 5	471			59.31		26.09	0.08	0		7.25	7.43	0.15	0.01		100.32		2.64	1.37	0	0	0	0	0		0.35	0.64	0.01		5			23.89	73.99	2.12		0.239
BR GIC 10b	segregation	felsic segregation in upper gabbro	10b8 6	472			55.19	0.01	29.18	0.1			10.45	5.61	0.12			100.67		2.47	1.54	0	0	0	0	0		0.5	0.49	0.01		5.01			21.59	75.69	2.72		0.216
BR GIC 10b	segregation	felsic segregation in upper gabbro	10b8 7	473			56.04		28.26	0.12	0.03		9.77	6	0.17	0.02		100.41		2.51	1.49	0	0	0	0	0		0.47	0.52	0.01		5.01			0.11	4.08	95.82		0.001
BR GIC 10b	segregation	felsic segregation in upper gabbro	10b8 8	474			57.66	0.04	27.3	0.13	0.02		8.66	6.65	0.16	0.01		100.63		2.57	1.43	0	0	0	0	0		0.41	0.57	0.01		5.01			22.14	75.18	2.68		0.221
																																			0	0	0		0
BR GIC 10c	gabbro part	felsic segregation in upper gabbro	10c10 1	1			58.53	0.06	27.14	0.09			8.19	7.05	0.19	0.02		101.26		2.59	1.41	0	0	0	0	0		0.39	0.6	0.01		5.01			38.66	60.28	1.06		0.387
BR GIC 10c	gabbro part	felsic segregation in upper gabbro	10c10 2	2			57.42	0.03	27.72	0.06		0.01	8.82	6.69	0.14			100.88		2.55	1.45	0	0	0	0	0		0.42	0.58	0.01		5.01			41.82	57.42	0.77		0.418
BR GIC 10c	gabbro part	felsic segregation in upper gabbro	10c10 3	3			58.24	0.05	26.99	0.05	0.01		7.99	7.13	0.15			100.61		2.59	1.41	0	0	0	0	0		0.38	0.62	0.01		5.01			37.89	61.24	0.87		0.379
BR GIC 10c	gabbro part	felsic segregation in upper gabbro	10c10 4	4			58.91		26.44	0.08		0	7.51	7.35	0.14			100.43		2.62	1.39	0	0	0	0	0		0.36	0.63	0.01		5.01			35.8	63.4	0.81		0.358
BR GIC 10c	gabbro part	felsic segregation in upper gabbro	10c10 5	5			58.49		27.3	0.09		0.02	8.24	7.07	0.19			101.39		2.58	1.42	0	0	0	0	0		0.39	0.61	0.01		5.01			38.77	60.16	1.07		0.388
BR GIC 10c	gabbro part	felsic segregation in upper gabbro	10c10 6	6			58.76	0.06	26.79	0.03			7.86	7.07	0.15			100.71		2.61	1.4	0	0	0	0	0		0.37	0.61	0.01		5			37.73	61.4	0.87		0.377
BR GIC 10c	gabbro part	felsic segregation in upper gabbro	10c10 7	7			54.18	0.07	29.79	0.08			11.53	5.11	0.14			100.89		2.43	1.57	0	0	0	0	0		0.55	0.44	0.01		5.01			55.04	44.17	0.78		0.55
BR GIC 10c	gabbro part	felsic segregation in upper gabbro	10c10 8	8			60.26	0.01	26.02	0.08			6.74	7.74	0.14			100.99		2.66	1.35	0	0	0	0	0		0.32	0.66	0.01		5			32.24	66.99	0.77		0.322
BR GIC 10c	gabbro part	felsic segregation in upper gabbro	10c10 9	9			57.16	0.06	27.97	0.11	0.03		9.06	6.43	0.13			100.95		2.54	1.47	0	0	0	0	0		0.43	0.55	0.01		5.01			43.46	55.81	0.73		0.435
BR GIC 10c	gabbro part	felsic segregation in upper gabbro	10c10 10	10			53.46		30.29	0.07	0.02		11.93	4.71	0.1	0.02		100.6		2.4	1.61	0	0	0	0	0		0.57	0.41	0.01		5			58	41.45	0.55		0.58
BR GIC 10c	gabbro part	felsic segregation in upper gabbro	10c10 11	11			58.51	0.05	27.07	0.13	0.01		7.99	7.18	0.16			101.09		2.59	1.41	0	0	0	0	0		0.38	0.62	0.01		5.01			37.73	61.36	0.91		0.377
BR GIC 10c	gabbro part	felsic segregation in upper gabbro	10c9 1	21			58.11		27.36	0.14	0.01	0.01	8.58	6.7	0.13			101.04		2.58	1.43	0	0.01	0	0	0		0.41	0.58	0.01		5			41.14	58.11	0.75		0.411
BR GIC 10c	gabbro part	felsic segregation in upper gabbro	10c9 2	22			59.55		26.54	0.12		0.01	7.44	7.47	0.16	0.05		101.34		2.63	1.38	0	0	0	0	0		0.35	0.64	0.01		5.01			35.16	63.93	0.91		0.352
BR GIC 10c	gabbro part	felsic segregation in upper gabbro	10c9 3	23			54.66	0.01	29.93	0.13	0	0.02	11.09	5.22	0.09			101.16		2.44	1.57	0	0	0	0	0		0.53	0.45	0.01		5			53.7	45.77	0.53		0.537
BR GIC 10c	gabbro part	felsic segregation in upper gabbro	10c9 4	24			52.21	0.02	31.52	0.15	0.01	0.02	13.2	4.04	0.06			101.21		2.34	1.67	0	0.01	0	0	0		0.63	0.35	0		5			64.16	35.52	0.32		0.642
BR GIC 10c	gabbro part	felsic segregation in upper gabbro	10c9 5	25			50.37		32.65	0.08		0.01	14.56	3.25	0.07	0.01		100.99		2.27	1.74	0	0	0	0	0		0.7	0.28	0		5			70.92	28.67	0.41		0.709
BR GIC 10c	gabbro part	felsic segregation in upper gabbro	10c9 6	26			56.31	0	28.46	0.1	0.04	0.02	9.95	6	0.1	0.04		101.02		2.51	1.49	0	0	0	0	0		0.48	0.52	0.01		5.01			47.56	51.87	0.56		0.476
BR GIC 10c	gabbro part	felsic segregation in upper gabbro	10c9 7	27			52.48	0.02	31.13	0.23			12.85	4.25	0.07			101.03		2.36	1.65	0	0.01	0	0	0		0.62	0.37	0		5.01			62.3	37.3	0.39		0.623
BR GIC 10c	gabbro part	felsic segregation in upper gabbro	10c9 8	28			54.96	0.02	29.55	0.14		0	10.96	5.49	0.09			101.19		2.45	1.55	0	0.01	0	0	0		0.52	0.47	0.01		5.01			52.18	47.3	0.52		0.522
BR GIC 10c	gabbro part	felsic segregation in upper gabbro	10c9 9	29			51.09	0.01	31.91	0.23		0.02	13.73	3.69	0.07			100.74		2.31	1.7	0	0.01	0	0	0		0.66	0.32	0		5.01			67	32.61	0.38		0.67
BR GIC 10c	gabbro part	felsic segregation in upper gabbro	10c9 10	30			51.24		31.81	0.2	0.01	0.02	13.92	3.92	0.03	0.06		101.2		2.31	1.69	0	0.01	0	0	0		0.67	0.34	0		5.02			66.12	33.71	0.18		0.661
BR GIC 10c	segregation	felsic segregation in upper gabbro	Line 1 pro1	114			62.92		23.71	0.12		0.01	4.64	8.71	0.41	0.02		100.54		2.77	1.23	0	0	0	0	0		0.22	0.74	0.02		5			22.21	75.44	2.35		0.222
BR GIC 10c	segregation	felsic segregation in upper gabbro	Line 2 pro1	115			62.83	0.05	23.5	0.16		0.02	4.37	8.91	0.59			100.43		2.77	1.22	0	0.01	0	0	0		0.21	0.76	0.03		5.01			20.61	76.08	3.31		0.206
BR GIC 10c	segregation	felsic segregation in upper gabbro	Line 3 pro1	116			63.04	0.05	23.79	0.13			4.65	8.82	0.48	0.06		101.03		2.77	1.23	0	0	0	0	0		0.22	0.75	0.03		5			21.95	75.34	2.71		0.22
BR GIC 10c	segregation	felsic segregation in upper gabbro	Line 4 pro1	117			62.48	0.04	23.73	0.13	0.02	0.02	4.7	8.81	0.52	0.01		100.45		2.76	1.24	0	0	0	0	0		0.22	0.76	0.03		5.01			22.11	74.98	2.91		0.221
BR GIC 10c	segregation	felsic segregation in upper gabbro	Line 5 pro1	118			62.45	0.01	23.96	0.14	0.02	0	4.81	8.73	0.5			100.62		2.75	1.25	0	0.01	0	0	0		0.23	0.75	0.03		5.01			22.68	74.49	2.83		0.227
BR GIC 10c	segregation	felsic segregation in upper gabbro	Line 6 pro1	119			62.13	0.02	23.72	0.15	0.02		4.85	8.65	0.48			100		2.76	1.24	0	0.01	0	0	0		0.23	0.74	0.03		5.01			23.01	74.3	2.68		0.23
BR GIC 10c	segregation	felsic segregation in upper gabbro	Line 7 pro1	120			59.02	0.01	22.38	0.14	0.01	0.02	4.68	7.25	0.46			93.96		2.78	1.24	0	0.01	0	0	0		0.24	0.66	0.03		4.95			25.5	71.52	2.99		0.255
BR GIC 10c	segregation	felsic segregation in upper gabbro	Line 8 pro1	121			62.73	0.02	23.94	0.13		0.01	4.94	8.78	0.45	0		100.99		2.76	1.24	0	0	0	0	0		0.23	0.75	0.03		5.01			23.12	74.39	2.49		0.231
BR GIC 10c	segregation	felsic segregation in upper gabbro	Line 9 pro1	122			62.52	0.01	23.89	0.16		0.03	4.68	8.51	0.46			100.25		2.76	1.24	0	0.01	0	0	0		0.22	0.73	0.03		4.99			22.67	74.66	2.67		0.227
BR GIC 10c	segregation	felsic segregation in upper gabbro	Line 10 pro1	123			62.78	0	24.08	0.2			4.95	8.55	0.51			101.07		2.76	1.25	0	0.01	0	0	0		0.23	0.73	0.03		5			23.55	73.57	2.88		0.236
BR GIC 10c	segregation	felsic segregation in upper gabbro	Line 11 pro1	124			62.52	0	24.11	0.13	0.02		5.02	8.67	0.53	0.07		101.07		2.75	1.25	0	0	0	0	0		0.24	0.74	0.03		5.01			23.5	73.52	2.98		0.235
BR GIC 10c	segregation	felsic segregation in upper gabbro	Line 12 pro1	125			60.79		25.28	0.1			6.36	7.89	0.41			100.82		2.69	1.32	0	0	0	0	0		0.3	0.68	0.02		5.01			30.13	67.58	2.29		0.301
BR GIC 10c	segregation	felsic segregation in upper gabbro	Line 13 pro1	126			58.2	0.02	26.87	0.07		0	8.14	6.91	0.28			100.48		2.59	1.41	0	0	0	0	0		0.39	0.6	0.02		5.01			38.83	59.61	1.56		0.388
BR GIC 10c	segregation	felsic segregation in upper gabbro	Line 14 pro1	127			57.61		27.37	0.07			8.49	6.55	0.27			100.35		2.57	1.44	0	0	0	0	0		0.41	0.57	0.02		5			41.06	57.39	1.54		0.411
BR GIC 10c	segregation	felsic segregation in upper gabbro	Line 15 pro1	128			57.71	0.02	27.42	0.1	0.02		8.65	6.62	0.28	0.02		100.83		2.57	1.44	0	0	0	0	0		0.41	0.57	0.02		5.01			41.28	57.15	1.56		0.413
BR GIC 10c	segregation	felsic segregation in upper gabbro	Line 16 pro1	129			57.79	0.02	27.15	0.07			8.63	6.6	0.32			100.58		2.58	1.43	0	0	0	0	0		0.41	0.57	0.02		5.01			41.19	56.97	1.84		0.412
BR GIC 10c	segregation	felsic segregation in upper gabbro	Line 17 pro1	130			55.48		26.34	0.09	0		8.41	6.58	0.21	0.01		97.11		2.56	1.43	0	0	0	0	0		0.42	0.59	0.01		5.02			40.9	57.87	1.23		0.409
BR GIC 10c	segregation	felsic segregation in upper gabbro	Line 18 pro1	131			57.73	0.05	27.5	0.03			8.59	6.66	0.3	0.05		100.9		2.57	1.44	0	0	0	0	0		0.41	0.57	0.02		5.01			40.93	57.4	1.67		0.409
BR GIC 10c	segregation	felsic segregation in upper gabbro	Line 19 pro1	132			57.84	0.05	27.42	0.04		0.01	8.55	6.76	0.3	0.03		101		2.57	1.44	0	0	0	0	0		0.41	0.58	0.02		5.01			40.44	57.88	1.68		0.404
BR GIC 10c	segregation	felsic segregation in upper gabbro	Line 20 pro1	133			58.5	0.01	27.09	0.07			8	6.96	0.27	0.04		100.95		2.59	1.42	0	0	0	0	0		0.38	0.6	0.02		5.01			38.26	60.22	1.52		0.383
BR GIC 10c	segregation	felsic segregation in upper gabbro	Line 21 pro1	134			57.75	0.03	27.23	0.05	0.01	0.01	8.54	6.67	0.27	0.04		100.59		2.57	1.43	0	0	0	0	0		0.41	0.58	0.02		5.01			40.83	57.67	1.51		0.408
BR GIC 10c	segregation	felsic segregation in upper gabbro	Line 22 pro1	135			58.03	0.05	27.39	0.08		0.01	8.53	6.57	0.26	0.03		100.94		2.57	1.43	0	0	0	0	0		0.41	0.56	0.01		5			41.17	57.35	1.48		0.412
BR GIC 10c	segregation	felsic segregation in upper gabbro	Line 23 pro1	136			57.72		27.42	0.06		0.01	8.65	6.67	0.2			100.72		2.57	1.44	0	0	0	0	0		0.41	0.58	0.01		5.01			41.28	57.61	1.11		0.413
BR GIC 10c	segregation	felsic segregation in upper gabbro	Line 24 pro1	137			58.04	0.02	27.59	0.02		0	8.58	6.67	0.23			101.14		2.57	1.44	0	0	0	0	0		0.41	0.57	0.01		5			41.01	57.71	1.28		0.41
BR GIC 10c	segregation	felsic segregation in upper gabbro	Line 25 pro1	138			57.34	0.01	27.49	0.07	0.01		8.72	6.48	0.26	0		100.38		2.56	1.45	0	0	0	0	0		0.42	0.56	0.01		5			42.02	56.5	1.47		0.42
BR GIC 10c	segregation	felsic segregation in upper gabbro	Line 26 pro1	139			48.53		22.96	0.07		0.01	7.29	4.62	0.63	0.01		84.12		2.58	1.44	0	0	0	0	0		0.42	0.48	0.04		4.96			44.48	50.94	4.58		0.445
BR GIC 10c	segregation	felsic segregation in upper gabbro	Line 27 pro1	140			58.23		27.25	0.02	0.01		8.36	6.77	0.28			100.91		2.58	1.42	0	0	0	0	0		0.4	0.58	0.02		5			39.94	58.47	1.59		0.399
BR GIC 10c	segregation	felsic segregation in upper gabbro	Line 28 pro1	141			58.11	0.04	27.09	0.1	0.02	0.01	8.36	6.59	0.29			100.6		2.59	1.42	0	0	0	0	0		0.4	0.57	0.02		5			40.52	57.8	1.68		0.405
BR GIC 10c	segregation	felsic segregation in upper gabbro	Line 29 pro1	142			58.05	0.01	27.29	0.05			8.29	6.91	0.22			100.83		2.58	1.43	0	0	0	0	0		0.39	0.6	0.01		5.01			39.38	59.39	1.24		0.394
BR GIC 10c	segregation	felsic segregation in upper gabbro	Line 30 pro1	143			58.25		27.27	0.08			8.32	6.78	0.25			100.95		2.58	1.43	0	0	0	0	0		0.4	0.58	0.01		5			39.83	58.73	1.44		0.398
BR GIC 10c	segregation	felsic segregation in upper gabbro	Line 31 pro1	144			58.15		27.12	0.03	0		8.16	6.73	0.26			100.45		2.59	1.42	0	0	0	0	0		0.39	0.58	0.01		5			39.52	58.99	1.49		0.395
BR GIC 10c	segregation	felsic segregation in upper gabbro	Line 32 pro1	145			58.27	0.01	27.21	0.06	0.01	0.01	8.4	6.83	0.21			101.01		2.58	1.42	0	0	0	0	0		0.4	0.59	0.01		5.01			39.97	58.84	1.19		0.4
BR GIC 10c	segregation	felsic segregation in upper gabbro	Line 33 pro1	146			57.48	0.04	27.26	0.08		0.01	8.32	6.83	0.24			100.26		2.57	1.44	0	0	0	0	0		0.4	0.59	0.01		5.01			39.67	58.95	1.37		0.397
BR GIC 10c	segregation	felsic segregation in upper gabbro	Line 34 pro1	147			56.5		26.37	0.09	0.01	0.02	8.31	6.52	0.27	0.04		98.12		2.58	1.42	0	0	0	0	0		0.41	0.58	0.02		5.01			40.64	57.77	1.6		0.406
BR GIC 10c	segregation	felsic segregation in upper gabbro	Line 35 pro1	148			57.95	0.09	27.66	0.09	0.01	0.02	8.58	6.55	0.27			101.21		2.56	1.44	0	0	0	0	0		0.41	0.56	0.02		5			41.37	57.09	1.54		0.414
BR GIC 10c	segregation	felsic segregation in upper gabbro	Line 36 pro1	149			56.88	0.02	26.81	0.07			8.54	6.38	0.36			99.06		2.57	1.43	0	0	0	0	0		0.41	0.56	0.02		5			41.65	56.26	2.09		0.416
BR GIC 10c	segregation	felsic segregation in upper gabbro	Line 37 pro1	150			57.66	0.07	27.26	0.08	0.01	0.03	8.59	6.72	0.27			100.7		2.57	1.43	0	0	0	0	0		0.41	0.58	0.02		5.01			40.78	57.69	1.53		0.408
BR GIC 10c	segregation	felsic segregation in upper gabbro	Line 38 pro1	151			57.9	0	27.39	0.07	0.01	0.01	8.68	6.69	0.25			101		2.57	1.43	0	0	0	0	0		0.41	0.58	0.01		5.01			41.18	57.43	1.4		0.412
BR GIC 10c	segregation	felsic segregation in upper gabbro	Line 39 pro1	152			56.89	0.01	27.28	0.12			8.74	6.65	0.26	0.01		99.96		2.56	1.44	0	0	0	0	0		0.42	0.58	0.01		5.02			41.47	57.07	1.46		0.415
BR GIC 10c	segregation	felsic segregation in upper gabbro	Line 40 pro1	153			57.3	0.01	27.35	0.1	0.01		8.59	6.67	0.27			100.29		2.56	1.44	0	0	0	0	0		0.41	0.58	0.02		5.01			40.92	57.57	1.51		0.409
BR GIC 10c	segregation	felsic segregation in upper gabbro	Line 41 pro1	154			57.77	0.02	27.32	0.09			8.75	6.6	0.37	0.02		100.93		2.57	1.43	0	0	0	0	0		0.42	0.57	0.02		5.01			41.39	56.51	2.1		0.414
BR GIC 10c	segregation	felsic segregation in upper gabbro	Line 42 pro1	155			54.57	0	25.82	0.13	0.02	0.01	8.37	6.12	0.23			95.26		2.57	1.43	0	0.01	0	0	0		0.42	0.56	0.01		5			42.46	56.17	1.37		0.425
BR GIC 10c	segregation	felsic segregation in upper gabbro	Line 43 pro1	156			57.89		27.45	0.08		0.02	8.68	6.75	0.26			101.12		2.57	1.43	0	0	0	0	0		0.41	0.58	0.01		5.01			40.94	57.63	1.43		0.409
BR GIC 10c	segregation	felsic segregation in upper gabbro	Line 44 pro1	157			58.12	0.03	27.35	0.1			8.56	6.58	0.3			101.03		2.58	1.43	0	0	0	0	0		0.41	0.57	0.02		5			41.12	57.19	1.69		0.411
BR GIC 10c	segregation	felsic segregation in upper gabbro	Line 45 pro1	158			62.33	0.01	24.25	0.07	0.02	0.01	5.24	8.41	0.59			100.91		2.74	1.26	0	0	0	0	0		0.25	0.72	0.03		5			24.76	71.93	3.31		0.248
BR GIC 10c	segregation	felsic segregation in upper gabbro	Line 46 pro1	159			61.46	0.05	24.15	0.13		0.02	5.27	8.17	0.58	0.01		99.84		2.73	1.27	0	0	0	0	0		0.25	0.71	0.03		5			25.41	71.28	3.31		0.254
BR GIC 10c	segregation	felsic segregation in upper gabbro	Line 47 pro1	160			61.49	0	24.28	0.15		0.01	5.18	8.38	0.64	0		100.13		2.73	1.27	0	0.01	0	0	0		0.25	0.72	0.04		5.01			24.53	71.84	3.63		0.245
BR GIC 10c	segregation	felsic segregation in upper gabbro	Line 48 pro1	161			61.82		24.4	0.14	0	0.02	5.16	8.42	0.56			100.51		2.73	1.27	0	0.01	0	0	0		0.24	0.72	0.03		5.01			24.51	72.31	3.18		0.245
BR GIC 10c	segregation	felsic segregation in upper gabbro	Line 49 pro1	162			62.65	0.02	24.59	0.08		0	5.06	8.74	0.42	0.03		101.6		2.74	1.27	0	0	0	0	0		0.24	0.74	0.02		5.01			23.66	73.98	2.36		0.237
BR GIC 10c	segregation	felsic segregation in upper gabbro	Line 50 pro1	163			62.47		24	0.06	0.01		4.71	8.74	0.46	0.03		100.47		2.76	1.25	0	0	0	0	0		0.22	0.75	0.03		5			22.37	75.06	2.57		0.224
BR GIC 10c	segregation	felsic segregation in upper gabbro	Line 51 pro1	164			63.05	0.06	23.99	0.09		0.02	4.69	8.9	0.5			101.29		2.76	1.24	0	0	0	0	0		0.22	0.76	0.03		5.01			21.94	75.3	2.76		0.219
BR GIC 10c	segregation	felsic segregation in upper gabbro	Line 52 pro1	165			63.01		23.74	0.05		0	4.59	8.71	0.62	0.01		100.73		2.77	1.23	0	0	0	0	0		0.22	0.74	0.03		5			21.78	74.73	3.49		0.218
BR GIC 10c	segregation	felsic segregation in upper gabbro	Line 53 pro1	166			62.82	0.01	23.84	0.21		0	4.62	8.73	0.5	0.09		100.83		2.77	1.24	0	0.01	0	0	0		0.22	0.75	0.03		5			22	75.17	2.83		0.22
BR GIC 10c	segregation	felsic segregation in upper gabbro	Line 54 pro1	167			62.34	0	23.89	0.04			4.65	8.52	0.35	0.05		99.84		2.76	1.25	0	0	0	0	0		0.22	0.73	0.02		4.99			22.72	75.26	2.01		0.227
BR GIC 10c	segregation	felsic segregation in upper gabbro	Line 55 pro1	168			58.61	0.02	22.71	0.08		0	4.58	8.57	0.75	0		95.33		2.74	1.25	0	0	0	0	0		0.23	0.78	0.04		5.05			21.83	73.9	4.27		0.218
BR GIC 10c	segregation	felsic segregation in upper gabbro	Line 56 pro1	169			62.82	0.02	24.04	0.16			4.74	8.67	0.45			100.9		2.76	1.24	0	0.01	0	0	0		0.22	0.74	0.03		5			22.61	74.83	2.56		0.226
BR GIC 10c	segregation	felsic segregation in upper gabbro	Line 57 pro1	170			62.99	0.01	24.13	0.07		0	4.75	8.91	0.46	0.02		101.34		2.76	1.25	0	0	0	0	0		0.22	0.76	0.03		5.01			22.16	75.28	2.55		0.222
BR GIC 10c	segregation	felsic segregation in upper gabbro	Line 58 pro1	171			63.18	0.02	24.04	0.11	0.03	0.02	4.71	8.54	0.62	0.08		101.34		2.77	1.24	0	0	0	0	0		0.22	0.73	0.03		4.99			22.51	73.97	3.52		0.225
BR GIC 10c	segregation	felsic segregation in upper gabbro	Line 59 pro1	172			62.96	0.01	23.83	0.1		0.01	4.64	8.75	0.66			100.94		2.77	1.23	0	0	0	0	0		0.22	0.75	0.04		5.01			21.83	74.49	3.68		0.218
BR GIC 10c	segregation	felsic segregation in upper gabbro	Line 60 pro1	173			62.54		23.84	0.15		0	4.77	8.82	0.53			100.65		2.76	1.24	0	0.01	0	0	0		0.23	0.75	0.03		5.01			22.32	74.72	2.96		0.223
BR GIC 10c	segregation	felsic segregation in upper gabbro	Line 1 pro2	182			62.31	0.03	24.25	0.07			4.94	8.75	0.23	0.05		100.63		2.75	1.26	0	0	0	0	0		0.23	0.75	0.01		5			23.46	75.24	1.3		0.235
BR GIC 10c	segregation	felsic segregation in upper gabbro	Line 2 pro2	183			63.28	0.04	23.36	0.13			4.14	9.42	0.36			100.74		2.78	1.21	0	0	0	0	0		0.2	0.8	0.02		5.02			19.14	78.88	1.98		0.191
BR GIC 10c	segregation	felsic segregation in upper gabbro	Line 3 pro2	184			62.9	0.02	23.79	0.16	0.03		4.71	8.88	0.42	0.05		100.95		2.77	1.23	0	0.01	0	0	0		0.22	0.76	0.02		5.01			22.13	75.52	2.34		0.221
BR GIC 10c	segregation	felsic segregation in upper gabbro	Line 4 pro2	185			62.89		23.96	0.16	0.02		4.85	8.72	0.46			101.07		2.76	1.24	0	0.01	0	0	0		0.23	0.74	0.03		5			22.9	74.51	2.6		0.229
BR GIC 10c	segregation	felsic segregation in upper gabbro	Line 5 pro2	186			62.37	0.01	24.1	0.13			4.85	8.7	0.45			100.61		2.75	1.25	0	0	0	0	0		0.23	0.74	0.03		5.01			22.98	74.49	2.54		0.23
BR GIC 10c	segregation	felsic segregation in upper gabbro	Line 6 pro2	187			62.66		23.88	0.13		0.02	4.98	8.82	0.49			100.98		2.76	1.24	0	0	0	0	0		0.23	0.75	0.03		5.01			23.11	74.16	2.72		0.231
BR GIC 10c	segregation	felsic segregation in upper gabbro	Line 7 pro2	188			62.38		23.97	0.19			4.95	8.68	0.53	0.05		100.74		2.75	1.25	0	0.01	0	0	0		0.23	0.74	0.03		5.01			23.25	73.81	2.94		0.233
BR GIC 10c	segregation	felsic segregation in upper gabbro	Line 8 pro2	189			63.47	0.01	24.12	0.15	0.04	0	4.8	8.8	0.52			101.91		2.76	1.24	0	0.01	0	0	0		0.22	0.74	0.03		5			22.49	74.63	2.88		0.225
BR GIC 10c	segregation	felsic segregation in upper gabbro	Line 9 pro2	190			61.93	0	24.52	0.17	0.04	0.01	5.28	8.34	0.48			100.76		2.73	1.27	0	0.01	0	0	0		0.25	0.71	0.03		5			25.23	72.05	2.72		0.252
BR GIC 10c	segregation	felsic segregation in upper gabbro	Line 10 pro2	191			61.57	0.02	24.38	0.2	0.03		5.34	8.32	0.51	0.04		100.39		2.73	1.27	0	0.01	0	0	0		0.25	0.71	0.03		5.01			25.43	71.69	2.88		0.254
BR GIC 10c	segregation	felsic segregation in upper gabbro	Line 11 pro2	192			61.82	0.04	24.33	0.19	0.03		5.3	8.42	0.49			100.61		2.73	1.27	0	0.01	0	0	0		0.25	0.72	0.03		5.01			25.08	72.17	2.75		0.251
BR GIC 10c	segregation	felsic segregation in upper gabbro	Line 12 pro2	193			61.69	0.05	24.67	0.18	0.01	0.03	5.48	8.36	0.47	0.06		101		2.72	1.28	0	0.01	0	0	0		0.26	0.71	0.03		5.01			25.89	71.46	2.66		0.259
BR GIC 10c	segregation	felsic segregation in upper gabbro	Line 13 pro2	194			59.81	0.07	25.4	0.17	0.03		6.57	7.61	0.42	0.01		100.09		2.67	1.33	0	0.01	0	0	0		0.31	0.66	0.02		5.01			31.52	66.08	2.39		0.315
BR GIC 10c	segregation	felsic segregation in upper gabbro	Line 14 pro2	195			59.67		25.87	0.17			7.06	7.29	0.37	0.02		100.45		2.65	1.35	0	0.01	0	0	0		0.34	0.63	0.02		5			34.13	63.76	2.11		0.341
BR GIC 10c	segregation	felsic segregation in upper gabbro	Line 15 pro2	196			59.06		26.08	0.19			7.42	7.26	0.34	0.04		100.4		2.63	1.37	0	0.01	0	0	0		0.35	0.63	0.02		5.01			35.41	62.68	1.91		0.354
BR GIC 10c	segregation	felsic segregation in upper gabbro	Line 16 pro2	197			59.34	0.01	26.47	0.17			7.66	7.13	0.31			101.09		2.62	1.38	0	0.01	0	0	0		0.36	0.61	0.02		5			36.61	61.62	1.77		0.366
BR GIC 10c	segregation	felsic segregation in upper gabbro	Line 17 pro2	198			59.04	0.04	26.61	0.18			7.71	7.06	0.41	0.06		101.09		2.61	1.39	0	0.01	0	0	0		0.37	0.61	0.02		5.01			36.77	60.92	2.31		0.368
BR GIC 10c	segregation	felsic segregation in upper gabbro	Line 18 pro2	199			58.87		26.49	0.17		0.01	7.7	7.2	0.31			100.75		2.61	1.39	0	0.01	0	0	0		0.37	0.62	0.02		5.01			36.52	61.72	1.76		0.365
BR GIC 10c	segregation	felsic segregation in upper gabbro	Line 19 pro2	200			59.23		26.62	0.11	0	0.01	7.78	7.05	0.35	0.05		101.21		2.62	1.39	0	0	0	0	0		0.37	0.6	0.02		5			37.14	60.9	1.96		0.371
BR GIC 10c	segregation	felsic segregation in upper gabbro	Line 20 pro2	201			58.89		26.79	0.21	0.04	0	7.82	7.12	0.34	0.01		101.22		2.6	1.4	0	0.01	0	0	0		0.37	0.61	0.02		5.01			37.03	61.05	1.92		0.37
BR GIC 10c	segregation	felsic segregation in upper gabbro	Line 21 pro2	202			58.99	0.05	26.58	0.2	0.03		7.8	7.07	0.37	0.03		101.13		2.61	1.39	0	0.01	0	0	0		0.37	0.61	0.02		5.01			37.07	60.83	2.1		0.371
BR GIC 10c	segregation	felsic segregation in upper gabbro	Line 22 pro2	203			58.48	0.02	26.52	0.2			7.71	7.03	0.32	0.02		100.28		2.61	1.39	0	0.01	0	0	0		0.37	0.61	0.02		5.01			37.03	61.13	1.84		0.37
BR GIC 10c	segregation	felsic segregation in upper gabbro	Line 23 pro2	204			58.39		26.38	0.16	0.02	0.01	7.73	7.03	0.41	0.04		100.19		2.61	1.39	0	0.01	0	0	0		0.37	0.61	0.02		5.01			36.9	60.75	2.35		0.369
BR GIC 10c	segregation	felsic segregation in upper gabbro	Line 24 pro2	205			58.87	0.01	26.45	0.27		0	7.79	7.05	0.32			100.76		2.61	1.38	0	0.01	0	0	0		0.37	0.61	0.02		5.01			37.21	60.96	1.83		0.372
BR GIC 10c	segregation	felsic segregation in upper gabbro	Line 25 pro2	206			58.48	0.01	26.63	0.19		0	7.84	6.88	0.35			100.37		2.61	1.4	0	0.01	0	0	0		0.37	0.59	0.02		5			37.89	60.11	2		0.379
BR GIC 10c	segregation	felsic segregation in upper gabbro	Line 26 pro2	207			58.69		26.55	0.2	0	0.01	7.83	6.96	0.36	0.04		100.62		2.61	1.39	0	0.01	0	0	0		0.37	0.6	0.02		5			37.54	60.41	2.04		0.375
BR GIC 10c	segregation	felsic segregation in upper gabbro	Line 27 pro2	208			54.01	0.03	24.56	0.18		0.02	7.34	6.48	0.32			92.94		2.6	1.39	0	0.01	0	0	0		0.38	0.61	0.02		5.01			37.72	60.34	1.95		0.377
BR GIC 10c	segregation	felsic segregation in upper gabbro	Line 28 pro2	209			58.27		26.59	0.22	0.02		7.91	7.01	0.37			100.38		2.6	1.4	0	0.01	0	0	0		0.38	0.61	0.02		5.01			37.61	60.31	2.08		0.376
BR GIC 10c	segregation	felsic segregation in upper gabbro	Line 29 pro2	210			58.59	0.02	26.78	0.11		0.03	7.88	7.03	0.33			100.76		2.6	1.4	0	0	0	0	0		0.37	0.61	0.02		5.01			37.53	60.58	1.89		0.375
BR GIC 10c	segregation	felsic segregation in upper gabbro	Line 30 pro2	211			58.57	0.01	26.42	0.14	0.03		7.94	6.94	0.33	0.03		100.41		2.61	1.39	0	0.01	0	0	0		0.38	0.6	0.02		5			38.02	60.11	1.88		0.38
BR GIC 10c	segregation	felsic segregation in upper gabbro	Line 31 pro2	212			58.79	0.01	26.6	0.2			7.88	6.88	0.35	0.04		100.76		2.61	1.39	0	0.01	0	0	0		0.38	0.59	0.02		5			38	59.99	2.01		0.38
BR GIC 10c	segregation	felsic segregation in upper gabbro	Line 32 pro2	213			58.78		26.69	0.16		0.03	7.92	7.05	0.32			100.95		2.61	1.39	0	0.01	0	0	0		0.38	0.61	0.02		5.01			37.62	60.56	1.82		0.376
BR GIC 10c	segregation	felsic segregation in upper gabbro	Line 33 pro2	214			58.77	0.03	26.68	0.14	0.01	0.02	8.03	7.05	0.32			101.03		2.6	1.39	0	0.01	0	0	0		0.38	0.61	0.02		5.01			37.93	60.27	1.8		0.379
BR GIC 10c	segregation	felsic segregation in upper gabbro	Line 34 pro2	215			58.79	0.07	26.57	0.13	0.03	0.01	8.04	6.89	0.35			100.87		2.61	1.39	0	0	0	0	0		0.38	0.59	0.02		5			38.4	59.59	2.01		0.384
BR GIC 10c	segregation	felsic segregation in upper gabbro	Line 35 pro2	216			58.74		26.73	0.21			7.91	6.91	0.36			100.86		2.61	1.4	0	0.01	0	0	0		0.38	0.59	0.02		5			37.93	60.01	2.06		0.379
BR GIC 10c	segregation	felsic segregation in upper gabbro	Line 36 pro2	217			58.56	0.03	26.51	0.17		0	7.98	6.94	0.36	0		100.56		2.61	1.39	0	0.01	0	0	0		0.38	0.6	0.02		5.01			38.03	59.9	2.07		0.38
BR GIC 10c	segregation	felsic segregation in upper gabbro	Line 37 pro2	218			58.86	0.02	27.05	0.14			8.03	6.93	0.36			101.39		2.6	1.41	0	0.01	0	0	0		0.38	0.59	0.02		5			38.24	59.71	2.05		0.382
BR GIC 10c	segregation	felsic segregation in upper gabbro	Line 38 pro2	219			58.64	0.01	26.68	0.21	0.01	0.01	7.98	6.91	0.38			100.83		2.6	1.4	0	0.01	0	0	0		0.38	0.59	0.02		5.01			38.15	59.71	2.14		0.381
BR GIC 10c	segregation	felsic segregation in upper gabbro	Line 39 pro2	220			58.8	0.02	26.66	0.25		0	8.04	6.89	0.35			101.01		2.61	1.39	0	0.01	0	0	0		0.38	0.59	0.02		5			38.42	59.61	1.97		0.384
BR GIC 10c	segregation	felsic segregation in upper gabbro	Line 40 pro2	221			58.68	0.04	26.83	0.17	0.01		7.91	6.89	0.36			100.89		2.6	1.4	0	0.01	0	0	0		0.38	0.59	0.02		5			38.02	59.91	2.07		0.38
BR GIC 10c	segregation	felsic segregation in upper gabbro	Line 41 pro2	222			58.21	0.03	26.6	0.16	0		7.93	6.82	0.36			100.11		2.6	1.4	0	0.01	0	0	0		0.38	0.59	0.02		5			38.28	59.63	2.09		0.383
BR GIC 10c	segregation	felsic segregation in upper gabbro	Line 42 pro2	223			58.59		26.76	0.15		0.02	7.99	6.85	0.38	0.01		100.74		2.6	1.4	0	0.01	0	0	0		0.38	0.59	0.02		5			38.36	59.49	2.16		0.384
BR GIC 10c	segregation	felsic segregation in upper gabbro	Line 43 pro2	224			58.48	0.02	26.79	0.15		0	7.99	6.92	0.37	0.03		100.74		2.6	1.4	0	0.01	0	0	0		0.38	0.6	0.02		5.01			38.15	59.73	2.13		0.381
BR GIC 10c	segregation	felsic segregation in upper gabbro	Line 44 pro2	225			58.88		26.9	0.14			7.98	6.9	0.31	0.05		101.16		2.6	1.4	0	0.01	0	0	0		0.38	0.59	0.02		5			38.32	59.89	1.79		0.383
BR GIC 10c	segregation	felsic segregation in upper gabbro	Line 45 pro2	226			58.37	0.02	26.82	0.21		0.01	8.05	6.92	0.32			100.73		2.6	1.41	0	0.01	0	0	0		0.38	0.6	0.02		5.01			38.41	59.77	1.82		0.384
BR GIC 10c	segregation	felsic segregation in upper gabbro	Line 46 pro2	227			58.63		26.84	0.08		0.01	8	6.98	0.31	0.05		100.89		2.6	1.4	0	0	0	0	0		0.38	0.6	0.02		5.01			38.09	60.18	1.73		0.381
BR GIC 10c	segregation	felsic segregation in upper gabbro	Line 47 pro2	228			58.53	0.09	26.92	0.12	0.01	0.01	8.05	6.91	0.32	0.02		100.97		2.6	1.41	0	0	0	0	0		0.38	0.59	0.02		5			38.45	59.71	1.84		0.385
BR GIC 10c	segregation	felsic segregation in upper gabbro	Line 48 pro2	229			58.51	0.04	26.97	0.14	0.01		8.05	6.92	0.35	0.03		101.01		2.59	1.41	0	0.01	0	0	0		0.38	0.59	0.02		5.01			38.37	59.66	1.97		0.384
BR GIC 10c	segregation	felsic segregation in upper gabbro	Line 49 pro2	230			58.74	0	27.04	0.16		0.01	8.12	6.82	0.36			101.25		2.6	1.41	0	0.01	0	0	0		0.38	0.58	0.02		5			38.88	59.05	2.07		0.389
BR GIC 10c	segregation	felsic segregation in upper gabbro	Line 50 pro2	231			58.71	0.05	26.95	0.14	0.01		8.1	7.01	0.33	0.04		101.34		2.6	1.4	0	0.01	0	0	0		0.38	0.6	0.02		5.01			38.23	59.89	1.87		0.382
BR GIC 10c	segregation	felsic segregation in upper gabbro	Line 51 pro2	232			58.35	0.02	26.72	0.18			8.16	6.89	0.34	0.07		100.73		2.6	1.4	0	0.01	0	0	0		0.39	0.59	0.02		5.01			38.81	59.26	1.93		0.388
BR GIC 10c	segregation	felsic segregation in upper gabbro	Line 52 pro2	233			58.57	0.03	26.93	0.16		0.02	8.17	6.89	0.3			101.07		2.59	1.41	0	0.01	0	0	0		0.39	0.59	0.02		5.01			38.89	59.4	1.71		0.389
BR GIC 10c	segregation	felsic segregation in upper gabbro	Line 53 pro2	234			20.51		9.57	0.14	0.02	0.04	3.18	1.93	0.15			35.52		2.58	1.42	0	0.01	0	0.01	0		0.43	0.47	0.02		4.95			46.45	50.97	2.58		0.465
BR GIC 10c	segregation	felsic segregation in upper gabbro	Line 54 pro2	235			57.03	0.06	26.35	0.14		0.01	7.98	6.85	0.33			98.74		2.59	1.41	0	0.01	0	0	0		0.39	0.6	0.02		5.02			38.41	59.7	1.89		0.384
BR GIC 10c	segregation	felsic segregation in upper gabbro	Line 55 pro2	236			30.08		14.69	0.08	0.01	0.03	6.27	2.59	0.17	0.01		53.93		2.52	1.45	0	0.01	0	0	0		0.56	0.42	0.02		4.98			56.23	41.97	1.8		0.562
BR GIC 10c	segregation	felsic segregation in upper gabbro	Line 56 pro2	237			58.37	0	27.1	0.08			8.15	6.94	0.35	0.01		101.02		2.59	1.42	0	0	0	0	0		0.39	0.6	0.02		5.01			38.57	59.44	1.99		0.386
BR GIC 10c	segregation	felsic segregation in upper gabbro	Line 57 pro2	238			58.45	0.01	27.07	0.11			8.24	6.78	0.25			100.91		2.59	1.41	0	0	0	0	0		0.39	0.58	0.01		5			39.6	58.99	1.41		0.396
BR GIC 10c	segregation	felsic segregation in upper gabbro	Line 58 pro2	239			58.27	0.06	26.96	0.09	0.02		8.15	6.88	0.26	0.03		100.72		2.59	1.41	0	0	0	0	0		0.39	0.59	0.01		5.01			38.95	59.55	1.5		0.389
BR GIC 10c	segregation	felsic segregation in upper gabbro	Line 59 pro2	240			56.21		26.1	0.1			8.02	6.58	0.34			97.36		2.59	1.42	0	0	0	0	0		0.4	0.59	0.02		5.01			39.41	58.58	2.01		0.394
BR GIC 10c	segregation	felsic segregation in upper gabbro	Line 60 pro2	241			57.96	0.02	26.9	0.12	0.02	0.01	8.22	6.86	0.35	0.01		100.46		2.59	1.41	0	0	0	0	0		0.39	0.59	0.02		5.01			39.02	59	1.98		0.39
BR GIC 10c	segregation	felsic segregation in upper gabbro	Line 61 pro2	242			58.23	0.04	26.93	0.14		0.01	8.25	6.8	0.34			100.72		2.59	1.41	0	0.01	0	0	0		0.39	0.59	0.02		5.01			39.36	58.71	1.93		0.394
BR GIC 10c	segregation	felsic segregation in upper gabbro	Line 62 pro2	243			57.66		26.79	0.1			8.22	6.69	0.34	0.01		99.81		2.59	1.42	0	0	0	0	0		0.4	0.58	0.02		5			39.67	58.39	1.94		0.397
BR GIC 10c	segregation	felsic segregation in upper gabbro	Line 63 pro2	244			58.26		27.08	0.18		0	8.29	6.89	0.31	0.1		101.11		2.58	1.42	0	0.01	0	0	0		0.39	0.59	0.02		5.01			39.22	59.03	1.75		0.392
BR GIC 10c	segregation	felsic segregation in upper gabbro	Line 64 pro2	245			57.97	0.04	26.87	0.16	0.02	0	8.33	6.75	0.34	0.02		100.49		2.59	1.41	0	0.01	0	0	0		0.4	0.58	0.02		5.01			39.75	58.33	1.93		0.397
BR GIC 10c	segregation	felsic segregation in upper gabbro	Line 65 pro2	246			58.31	0.01	27.07	0.2	0.02		8.39	6.79	0.35			101.14		2.58	1.41	0	0.01	0	0	0		0.4	0.58	0.02		5.01			39.78	58.22	2		0.398
BR GIC 10c	segregation	felsic segregation in upper gabbro	Line 66 pro2	247			58.43	0.02	27.11	0.16		0.01	8.33	6.77	0.32			101.14		2.59	1.41	0	0.01	0	0	0		0.4	0.58	0.02		5			39.73	58.47	1.8		0.397
BR GIC 10c	segregation	felsic segregation in upper gabbro	Line 67 pro2	248			57.72		26.97	0.15	0.02		8.42	6.68	0.34			100.29		2.58	1.42	0	0.01	0	0	0		0.4	0.58	0.02		5.01			40.25	57.84	1.91		0.402
BR GIC 10c	segregation	felsic segregation in upper gabbro	Line 68 pro2	249			56.79	0	26.35	0.16	0.01		8.02	6.63	0.35	0.02		98.32		2.59	1.42	0	0.01	0	0	0		0.39	0.59	0.02		5.01			39.23	58.72	2.06		0.392
BR GIC 10c	segregation	felsic segregation in upper gabbro	Line 69 pro2	250			58.29	0.05	26.99	0.12		0	8.32	6.77	0.33			100.86		2.59	1.41	0	0	0	0	0		0.4	0.58	0.02		5			39.67	58.46	1.86		0.397
BR GIC 10c	segregation	felsic segregation in upper gabbro	Line 70 pro2	251			57.94	0.04	27.24	0.23			8.33	6.74	0.3			100.81		2.58	1.43	0	0.01	0	0	0		0.4	0.58	0.02		5.01			39.91	58.4	1.69		0.399
BR GIC 10c	segregation	felsic segregation in upper gabbro	Line 71 pro2	252			57.64	0.06	27.02	0.26		0	8.35	6.63	0.35			100.31		2.58	1.42	0	0.01	0	0	0		0.4	0.57	0.02		5.01			40.22	57.8	1.98		0.402
BR GIC 10c	segregation	felsic segregation in upper gabbro	Line 72 pro2	253			58.1		27.21	0.16		0	8.44	6.67	0.33			100.92		2.58	1.42	0	0.01	0	0	0		0.4	0.57	0.02		5			40.35	57.76	1.89		0.404
BR GIC 10c	segregation	felsic segregation in upper gabbro	Line 73 pro2	254			58.5	0.02	27.25	0.16		0.01	8.49	6.64	0.35			101.42		2.58	1.42	0	0.01	0	0	0		0.4	0.57	0.02		5			40.6	57.42	1.98		0.406
BR GIC 10c	segregation	felsic segregation in upper gabbro	Line 74 pro2	255			58.33		27.15	0.2	0.02		8.45	6.68	0.29			101.13		2.58	1.42	0	0.01	0	0	0		0.4	0.57	0.02		5			40.46	57.87	1.67		0.405
BR GIC 10c	segregation	felsic segregation in upper gabbro	Line 75 pro2	256			58.26	0.04	27.32	0.17		0	8.49	6.71	0.33			101.32		2.58	1.42	0	0.01	0	0	0		0.4	0.58	0.02		5.01			40.37	57.76	1.87		0.404
BR GIC 10c	segregation	felsic segregation in upper gabbro	Line 76 pro2	257			57.87		27.19	0.19	0.01	0	8.38	6.81	0.31			100.76		2.58	1.43	0	0.01	0	0	0		0.4	0.59	0.02		5.01			39.77	58.47	1.76		0.398
BR GIC 10c	segregation	felsic segregation in upper gabbro	Line 77 pro2	258			58.15	0.03	27.25	0.13			8.38	6.62	0.32	0.04		100.91		2.58	1.43	0	0	0	0	0		0.4	0.57	0.02		5			40.39	57.75	1.86		0.404
BR GIC 10c	segregation	felsic segregation in upper gabbro	Line 78 pro2	259			57.86	0.03	27.18	0.13	0.02	0.02	8.36	6.66	0.3			100.55		2.58	1.43	0	0	0	0	0		0.4	0.58	0.02		5			40.25	58.01	1.74		0.403
BR GIC 10c	segregation	felsic segregation in upper gabbro	Line 79 pro2	260			58.46	0.02	27.3	0.14	0.02		8.33	6.71	0.34			101.31		2.58	1.42	0	0.01	0	0	0		0.39	0.57	0.02		5			39.92	58.17	1.91		0.399
BR GIC 10c	segregation	felsic segregation in upper gabbro	Line 80 pro2	261			58.79	0	27.01	0.15			8.4	6.63	0.35			101.32		2.6	1.41	0	0.01	0	0	0		0.4	0.57	0.02		4.99			40.35	57.67	1.99		0.403
BR GIC 10c	segregation	felsic segregation in upper gabbro	Line 81 pro2	262			58.28		27.39	0.05	0.03	0.01	8.53	6.74	0.3	0.04		101.37		2.58	1.43	0	0	0	0	0		0.4	0.58	0.02		5.01			40.45	57.88	1.67		0.405
BR GIC 10c	segregation	felsic segregation in upper gabbro	Line 82 pro2	263			58.27		27.14	0.13	0.02	0.01	8.34	6.8	0.35	0.01		101.07		2.58	1.42	0	0	0	0	0		0.4	0.58	0.02		5.01			39.6	58.41	1.99		0.396
BR GIC 10c	segregation	felsic segregation in upper gabbro	Line 83 pro2	264			57.77		26.81	0.13	0.02		8.33	6.67	0.32	0.04		100.08		2.59	1.42	0	0	0	0	0		0.4	0.58	0.02		5			40.12	58.07	1.81		0.401
BR GIC 10c	segregation	felsic segregation in upper gabbro	Line 84 pro2	265			57.47		27.11	0.15		0.02	8.41	6.77	0.3			100.23		2.57	1.43	0	0.01	0	0	0		0.4	0.59	0.02		5.02			40.01	58.28	1.71		0.4
BR GIC 10c	segregation	felsic segregation in upper gabbro	Line 85 pro2	266			58.36	0	27.21	0.11		0.03	8.38	6.84	0.32			101.25		2.58	1.42	0	0	0	0	0		0.4	0.59	0.02		5.01			39.64	58.54	1.81		0.396
BR GIC 10c	segregation	felsic segregation in upper gabbro	Line 86 pro2	267			58.07		27.24	0.09	0.02	0.01	8.38	6.72	0.22	0.01		100.74		2.58	1.43	0	0	0	0	0		0.4	0.58	0.01		5			40.29	58.44	1.27		0.403
BR GIC 10c	segregation	felsic segregation in upper gabbro	Line 87 pro2	268			58.48	0	27.14	0.06		0.01	8.32	6.82	0.25	0		101.09		2.59	1.42	0	0	0	0	0		0.39	0.59	0.01		5			39.69	58.89	1.43		0.397
BR GIC 10c	segregation	felsic segregation in upper gabbro	Line 88 pro2	269			58.29	0.02	27.31	0.06		0.02	8.33	6.81	0.22	0.03		101.09		2.58	1.43	0	0	0	0	0		0.4	0.58	0.01		5			39.85	58.92	1.23		0.398
BR GIC 10c	segregation	felsic segregation in upper gabbro	Line 89 pro2	270			57.6	0.03	27.07	0.1	0.01	0.01	8.26	6.77	0.27			100.13		2.58	1.43	0	0	0	0	0		0.4	0.59	0.02		5.01			39.64	58.8	1.56		0.396
BR GIC 10c	segregation	felsic segregation in upper gabbro	Line 90 pro2	271			58.51		27.26	0.08	0.01		8.25	6.89	0.29	0.01		101.3		2.59	1.42	0	0	0	0	0		0.39	0.59	0.02		5.01			39.15	59.2	1.65		0.391
BR GIC 10c	segregation	felsic segregation in upper gabbro	Line 91 pro2	272			58.24	0.01	27.02	0.11			8.31	6.9	0.25			100.84		2.59	1.41	0	0	0	0	0		0.4	0.59	0.01		5.01			39.39	59.18	1.43		0.394
BR GIC 10c	segregation	felsic segregation in upper gabbro	Line 92 pro2	273			58.44	0.01	27.02	0.05			8.11	6.93	0.25			100.8		2.59	1.41	0	0	0	0	0		0.39	0.6	0.01		5			38.74	59.86	1.4		0.387
BR GIC 10c	segregation	felsic segregation in upper gabbro	Line 93 pro2	274			62.51		19.97	0.06			0.99	0.89	14.65	0.02		99.09		2.91	1.1	0	0	0	0	0		0.05	0.08	0.87		5.01			4.92	8.03	87.06		0.049
BR GIC 10c	segregation	felsic segregation in upper gabbro	Line 94 pro2	275			58.41	0.06	27.18	0.1			8.41	6.8	0.24	0.01		101.21		2.58	1.42	0	0	0	0	0		0.4	0.58	0.01		5			40.08	58.58	1.34		0.401
BR GIC 10c	segregation	felsic segregation in upper gabbro	Line 95 pro2	276			58.03		26.99	0.15		0.01	8.5	6.89	0.26	0.04		100.87		2.58	1.41	0	0.01	0	0	0		0.41	0.59	0.01		5.02			39.94	58.59	1.48		0.399
BR GIC 10c	segregation	felsic segregation in upper gabbro	Line 96 pro2	277			58.31	0.01	27.04	0.08		0.02	8.36	6.87	0.25			100.93		2.59	1.41	0	0	0	0	0		0.4	0.59	0.01		5.01			39.65	58.96	1.39		0.396
BR GIC 10c	segregation	felsic segregation in upper gabbro	Line 97 pro2	278			58.04		27.25	0.14	0.02		8.34	6.66	0.26			100.72		2.58	1.43	0	0.01	0	0	0		0.4	0.57	0.01		5			40.28	58.2	1.52		0.403
BR GIC 10c	segregation	felsic segregation in upper gabbro	Line 98 pro2	279			58.22	0.05	27.13	0.15	0.03	0.03	8.03	6.79	0.34	0		100.75		2.59	1.42	0	0.01	0	0	0		0.38	0.58	0.02		5			38.76	59.3	1.93		0.388
BR GIC 10c	segregation	felsic segregation in upper gabbro	Line 99 pro2	280			58.49		27.29	0.1		0	8.32	6.82	0.3			101.32		2.58	1.42	0	0	0	0	0		0.39	0.58	0.02		5.01			39.58	58.7	1.72		0.396
BR GIC 10c	segregation	felsic segregation in upper gabbro	Line 100 pro2	281			58.03		27.01	0.09	0.02	0.02	8.25	6.8	0.26			100.47		2.59	1.42	0	0	0	0	0		0.39	0.59	0.01		5.01			39.56	58.97	1.48		0.396
BR GIC 10c	segregation	felsic segregation in upper gabbro	Line 101 pro2	282			58.27	0.04	27.31	0.13	0.02		8.35	6.78	0.27	0.01		101.18		2.58	1.43	0	0	0	0	0		0.4	0.58	0.02		5			39.89	58.57	1.54		0.399
BR GIC 10c	segregation	felsic segregation in upper gabbro	Line 102 pro2	283			57.95	0.08	27.1	0.13		0.02	8.22	6.82	0.39			100.72		2.58	1.42	0	0	0	0	0		0.39	0.59	0.02		5.01			39.12	58.68	2.2		0.391
BR GIC 10c	segregation	felsic segregation in upper gabbro	Line 103 pro2	284			58.25	0.03	26.94	0.14	0.02		8.26	6.69	0.31	0.05		100.69		2.59	1.41	0	0.01	0	0	0		0.39	0.58	0.02		5			39.84	58.38	1.78		0.398
BR GIC 10c	segregation	felsic segregation in upper gabbro	Line 104 pro2	285			58.66	0.02	27.08	0.13			8.3	6.78	0.27	0.04		101.29		2.59	1.41	0	0	0	0	0		0.39	0.58	0.02		5			39.74	58.71	1.56		0.397
BR GIC 10c	segregation	felsic segregation in upper gabbro	Line 105 pro2	286			58.43	0.01	27.01	0.14	0.04		8.16	6.89	0.3			100.97		2.59	1.41	0	0.01	0	0	0		0.39	0.59	0.02		5.01			38.89	59.43	1.68		0.389
BR GIC 10c	segregation	felsic segregation in upper gabbro	Line 106 pro2	287			58.67		26.9	0.12		0.01	8.1	6.76	0.35			100.9		2.6	1.41	0	0	0	0	0		0.38	0.58	0.02		5			39.06	58.96	1.98		0.391
BR GIC 10c	segregation	felsic segregation in upper gabbro	Line 107 pro2	288			58.57	0.02	27.04	0.09			8.2	6.77	0.31			101.01		2.59	1.41	0	0	0	0	0		0.39	0.58	0.02		5			39.37	58.83	1.8		0.394
BR GIC 10c	segregation	felsic segregation in upper gabbro	Line 108 pro2	289			58.29	0.05	26.98	0.19	0.01		8.14	6.94	0.38			100.98		2.59	1.41	0	0.01	0	0	0		0.39	0.6	0.02		5.01			38.47	59.41	2.11		0.385
BR GIC 10c	segregation	felsic segregation in upper gabbro	Line 109 pro2	290			0.43		0.05		0.01	0.01	0.06	0.02	0.02	0.05		0.65		3.23	0.43	0	0	0.08	0.1	0		0.45	0.33	0.19		4.82			46.56	33.99	19.45		0.466
BR GIC 10c	segregation	felsic segregation in upper gabbro	Line 110 pro2	291			59.06		27.2	0.18		0.02	8.07	7.03	0.33	0.07		101.96		2.6	1.41	0	0.01	0	0	0		0.38	0.6	0.02		5.01			38.1	60.04	1.86		0.381
BR GIC 10c	segregation	felsic segregation in upper gabbro	Line 111 pro2	292			58.81	0.02	26.76	0.14			8.05	6.88	0.33	0		100.98		2.61	1.4	0	0.01	0	0	0		0.38	0.59	0.02		5			38.53	59.61	1.85		0.385
BR GIC 10c	segregation	felsic segregation in upper gabbro	Line 112 pro2	293			58.67		26.85	0.1		0.01	8.01	6.92	0.32			100.87		2.6	1.4	0	0	0	0	0		0.38	0.6	0.02		5			38.3	59.89	1.81		0.383
BR GIC 10c	segregation	felsic segregation in upper gabbro	Line 113 pro2	294			58.75	0.04	27	0.13			8.03	6.89	0.33			101.17		2.6	1.41	0	0	0	0	0		0.38	0.59	0.02		5			38.44	59.66	1.89		0.384
BR GIC 10c	segregation	felsic segregation in upper gabbro	Line 114 pro2	295			58.23	0.05	26.58	0.36		0.03	7.93	6.89	0.31			100.37		2.6	1.4	0	0.01	0	0	0		0.38	0.6	0.02		5.01			38.18	60.03	1.79		0.382
BR GIC 10c	segregation	felsic segregation in upper gabbro	Line 115 pro2	296			58.67	0.01	26.7	0.14	0.03		8.04	7.06	0.35			101		2.6	1.4	0	0.01	0	0	0		0.38	0.61	0.02		5.01			37.88	60.16	1.96		0.379
BR GIC 10c	segregation	felsic segregation in upper gabbro	Line 116 pro2	297			58.9		26.94	0.2			8.02	7.05	0.32			101.43		2.6	1.4	0	0.01	0	0	0		0.38	0.6	0.02		5.01			37.91	60.31	1.79		0.379
BR GIC 10c	segregation	felsic segregation in upper gabbro	Line 117 pro2	298			58.75	0.02	26.67	0.17			7.91	6.92	0.3			100.73		2.61	1.4	0	0.01	0	0	0		0.38	0.6	0.02		5			38.05	60.26	1.7		0.38
BR GIC 10c	segregation	felsic segregation in upper gabbro	Line 118 pro2	299			58.76	0.01	26.84	0.14	0.02		7.91	7.01	0.3			100.97		2.6	1.4	0	0.01	0	0	0		0.38	0.6	0.02		5			37.76	60.55	1.69		0.378
BR GIC 10c	segregation	felsic segregation in upper gabbro	Line 119 pro2	300			58.81	0.04	26.75	0.11	0.02	0.01	7.82	7.15	0.32			101.03		2.61	1.4	0	0	0	0	0		0.37	0.61	0.02		5.01			37.01	61.19	1.8		0.37
BR GIC 10c	segregation	felsic segregation in upper gabbro	Line 120 pro2	301			59.13	0.03	26.5	0.12		0	7.77	7.06	0.31			100.91		2.62	1.38	0	0	0	0	0		0.37	0.61	0.02		5			37.15	61.08	1.77		0.372
BR GIC 10c	segregation	felsic segregation in upper gabbro	Line 121 pro2	302			59.24		26.66	0.11	0.01		7.69	7.2	0.34			101.27		2.62	1.39	0	0	0	0	0		0.36	0.62	0.02		5.01			36.4	61.67	1.94		0.364
BR GIC 10c	segregation	felsic segregation in upper gabbro	Line 122 pro2	303			59.28	0.02	26.66	0.18			7.71	7.09	0.32			101.26		2.62	1.39	0	0.01	0	0	0		0.36	0.61	0.02		5			36.86	61.33	1.81		0.369
BR GIC 10c	segregation	felsic segregation in upper gabbro	Line 123 pro2	304			59.15		26.4	0.16			7.46	7.08	0.35	0.05		100.63		2.63	1.38	0	0.01	0	0	0		0.35	0.61	0.02		5			36.07	61.94	1.99		0.361
BR GIC 10c	segregation	felsic segregation in upper gabbro	Line 124 pro2	305			59.2		26.19	0.18			7.46	7.16	0.31	0.01		100.52		2.63	1.37	0	0.01	0	0	0		0.36	0.62	0.02		5			35.87	62.35	1.79		0.359
BR GIC 10c	segregation	felsic segregation in upper gabbro	Line 125 pro2	306			58.27	0.05	25.68	0.18	0.01	0	7.4	6.91	0.41	0.02		98.93		2.63	1.37	0	0.01	0	0	0		0.36	0.6	0.02		5			36.31	61.3	2.38		0.363
BR GIC 10c	segregation	felsic segregation in upper gabbro	Line 126 pro2	307			59.61	0.01	26.37	0.12	0.03	0.01	7.3	7.25	0.39	0.05		101.12		2.63	1.37	0	0	0	0	0		0.35	0.62	0.02		5			34.94	62.84	2.22		0.349
BR GIC 10c	segregation	felsic segregation in upper gabbro	Line 127 pro2	308			59.83	0.03	26.21	0.13	0		7.3	7.19	0.38	0.07		101.13		2.64	1.36	0	0	0	0	0		0.35	0.62	0.02		4.99			35.15	62.66	2.2		0.351
BR GIC 10c	segregation	felsic segregation in upper gabbro	Line 128 pro2	309			59.9		26.29	0.12			7.31	7.32	0.38			101.31		2.64	1.37	0	0	0	0	0		0.35	0.63	0.02		5			34.78	63.07	2.15		0.348
BR GIC 10c	segregation	felsic segregation in upper gabbro	Line 129 pro2	310			56.3	0.07	25.25	1.84	0	1.57	6.28	6.68	0.7			98.67		2.58	1.36	0	0.07	0	0.11	0		0.31	0.59	0.04		5.06			32.71	62.96	4.33		0.327
BR GIC 10c	segregation	felsic segregation in upper gabbro	Line 130 pro2	311			59.57	0.23	25.84	0.67	0.03	0	6.91	7.32	0.41			100.97		2.64	1.35	0.01	0.02	0	0	0		0.33	0.63	0.02		5			33.48	64.16	2.36		0.335
BR GIC 10c	segregation	felsic segregation in upper gabbro	Line 131 pro2	312			60.3	0.04	25.78	0.12			6.94	7.65	0.36			101.2		2.66	1.34	0	0	0	0	0		0.33	0.65	0.02		5.01			32.69	65.26	2.04		0.327
BR GIC 10c	segregation	felsic segregation in upper gabbro	Line 132 pro2	313			58.4		24.69	0.25	0.55	0.02	6.33	7.24	0.45			97.92		2.67	1.33	0	0.01	0.02	0	0		0.31	0.64	0.03		5			31.69	65.66	2.65		0.317
BR GIC 10c	segregation	felsic segregation in upper gabbro	Line 133 pro2	314			60.78	0.03	25.36	0.16		0.02	6.51	7.74	0.4	0		101.01		2.68	1.32	0	0.01	0	0	0		0.31	0.66	0.02		5			31	66.75	2.25		0.31
BR GIC 10c	segregation	felsic segregation in upper gabbro	Line 134 pro2	315			61.04		25.31	0.14	0.01	0.01	6.37	7.89	0.42			101.19		2.69	1.31	0	0.01	0	0	0		0.3	0.67	0.02		5			30.14	67.53	2.34		0.301
BR GIC 10c	segregation	felsic segregation in upper gabbro	Line 135 pro2	316			61.39		25.13	0.15		0.01	6.15	8.05	0.42			101.28		2.7	1.3	0	0.01	0	0	0		0.29	0.69	0.02		5.01			28.98	68.69	2.33		0.29
BR GIC 10c	segregation	felsic segregation in upper gabbro	Line 136 pro2	317			61		24.87	0.16	0.01		5.94	7.92	0.36	0.01		100.28		2.71	1.3	0	0.01	0	0	0		0.28	0.68	0.02		5			28.7	69.22	2.09		0.287
BR GIC 10c	segregation	felsic segregation in upper gabbro	Line 137 pro2	318			61.19	0.05	24.88	0.1			5.86	8.33	0.3	0.04		100.76		2.7	1.3	0	0	0	0	0		0.28	0.71	0.02		5.01			27.52	70.8	1.68		0.275
BR GIC 10c	segregation	felsic segregation in upper gabbro	Line 138 pro2	319			62.03		24.73	0.17	0.01		5.61	8.23	0.42	0.04		101.24		2.72	1.28	0	0.01	0	0	0		0.26	0.7	0.02		5			26.69	70.93	2.38		0.267
BR GIC 10c	segregation	felsic segregation in upper gabbro	Line 139 pro2	320			62.06	0.03	24.73	0.14		0.01	5.39	8.35	0.37	0.01		101.09		2.73	1.28	0	0.01	0	0	0		0.25	0.71	0.02		5			25.73	72.15	2.12		0.257
BR GIC 10c	segregation	felsic segregation in upper gabbro	Line 140 pro2	321			61.9		24.57	0.18	0.03		5.46	8.35	0.42			100.9		2.73	1.28	0	0.01	0	0	0		0.26	0.71	0.02		5			25.89	71.74	2.36		0.259
BR GIC 10c	segregation	felsic segregation in upper gabbro	Line 141 pro2	322			62.41	0.03	24.46	0.15			5.2	8.38	0.36			100.98		2.74	1.27	0	0.01	0	0	0		0.24	0.71	0.02		4.99			24.99	72.95	2.06		0.25
BR GIC 10c	segregation	felsic segregation in upper gabbro	Line 142 pro2	323			61.93	0.03	24.61	0.15		0	5.58	8.1	0.35			100.74		2.73	1.28	0	0.01	0	0	0		0.26	0.69	0.02		4.99			27.01	70.98	2.01		0.27
BR GIC 10c	segregation	felsic segregation in upper gabbro	Line 143 pro2	324			62.18	0.02	24.64	0.15	0	0.01	5.32	8.51	0.39			101.21		2.73	1.27	0	0.01	0	0	0		0.25	0.72	0.02		5.01			25.13	72.67	2.21		0.251
BR GIC 10c	segregation	felsic segregation in upper gabbro	Line 144 pro2	325			62.04	0.02	24.56	0.13		0.01	5.38	8.6	0.43	0.01		101.16		2.73	1.27	0	0	0	0	0		0.25	0.73	0.02		5.01			25.06	72.56	2.38		0.251
BR GIC 10c	segregation	felsic segregation in upper gabbro	Line 145 pro2	326			63.23	0.04	24.06	0.12	0.02		4.43	9	0.38	0.01		101.28		2.77	1.24	0	0	0	0	0		0.21	0.76	0.02		5			20.93	76.95	2.12		0.209
BR GIC 10c	segregation	felsic segregation in upper gabbro	Line 146 pro2	327			62.54	0.01	24.5	0.11	0.03		5.26	8.49	0.48	0.04		101.46		2.74	1.26	0	0	0	0	0		0.25	0.72	0.03		5			24.82	72.49	2.69		0.248
BR GIC 10c	segregation	felsic segregation in upper gabbro	Line 147 pro2	328			62.54	0.01	24.14	0.13			5.03	8.6	0.47	0.02		100.95		2.75	1.25	0	0	0	0	0		0.24	0.73	0.03		5			23.8	73.58	2.62		0.238
BR GIC 10c	segregation	felsic segregation in upper gabbro	Line 148 pro2	329			63.05		23.88	0.12	0		4.57	8.78	0.43			100.82		2.77	1.24	0	0	0	0	0		0.22	0.75	0.02		5			21.8	75.77	2.43		0.218
BR GIC 10c	segregation	felsic segregation in upper gabbro	Line 149 pro2	330			63.26		23.69	0.14	0.04		4.4	8.82	0.46			100.81		2.78	1.23	0	0.01	0	0	0		0.21	0.75	0.03		5			21.06	76.34	2.6		0.211
BR GIC 10c	segregation	felsic segregation in upper gabbro	Line 150 pro2	331			62.41		23.82	0.12			4.66	8.74	0.35			100.11		2.76	1.24	0	0	0	0	0		0.22	0.75	0.02		5			22.32	75.66	2.02		0.223
BR GIC 10c	gabbro part	felsic segregation in upper gabbro	10c9 11	31			56.51		28.32	0.11			9.68	6.16	0.09			100.86		2.52	1.49	0	0	0	0			0.46	0.53	0		5.01			46.27	53.24	0.49		0.463
BR GIC 10c	gabbro part	felsic segregation in upper gabbro	10c9 12	32			54.53	0	29.68	0.12	0.04	0.03	11.09	5.27	0.1			100.85		2.44	1.57	0	0	0	0			0.53	0.46	0.01		5.01			53.49	45.95	0.57		0.535
BR GIC 10c	gabbro part	felsic segregation in upper gabbro	10c9 13	33			54.58		29.63	0.18	0.01	0.04	11.16	5.29	0.1			100.98		2.44	1.56	0	0.01	0	0			0.53	0.46	0.01		5.01			53.53	45.91	0.56		0.535
BR GIC 10c	gabbro part	felsic segregation in upper gabbro	10c9 14	34			56.3	0.01	28.48	0.1	0.01		9.6	6.09	0.14	0.08		100.82		2.51	1.5	0	0	0	0			0.46	0.53	0.01		5.01			46.2	52.98	0.81		0.462
BR GIC 10c	gabbro part	felsic segregation in upper gabbro	10c9 15	35			58.51	0.02	26.92	0.07			8.16	7.08	0.19			100.95		2.59	1.41	0	0	0	0			0.39	0.61	0.01		5.01			38.5	60.45	1.05		0.385
BR GIC 10c	gabbro part	felsic segregation in upper gabbro	10c9 16	36			58.53	0.08	27.19	0.07			8.32	7.12	0.17	0.05		101.53		2.58	1.41	0	0	0	0			0.39	0.61	0.01		5.02			38.86	60.21	0.93		0.389
BR GIC 10c	gabbro part	felsic segregation in upper gabbro	10c9 17	37			59.38	0	26.63	0.07	0.02	0.02	7.67	7.27	0.17			101.23		2.62	1.38	0	0	0	0			0.36	0.62	0.01		5			36.5	62.55	0.96		0.365
BR GIC 10c	gabbro part	felsic segregation in upper gabbro	10c9 18	38			57.59		27.85	0.04		0.02	8.94	6.62	0.13			101.2		2.55	1.45	0	0	0	0			0.42	0.57	0.01		5.01			42.42	56.84	0.75		0.424
BR GIC 10c	gabbro part	felsic segregation in upper gabbro	10c9 19	39			54.53	0.02	29.97	0.06			11.35	5.16	0.08			101.17		2.43	1.58	0	0	0	0			0.54	0.45	0		5			54.62	44.95	0.44		0.546
BR GIC 10c	gabbro part	felsic segregation in upper gabbro	10c9 20	40			57.56	0.05	27.84	0.08			8.93	6.48	0.1			101.04		2.55	1.46	0	0	0	0			0.42	0.56	0.01		5			42.98	56.44	0.58		0.43
BR GIC 10c	gabbro part	felsic segregation in upper gabbro	Line 1 GIC10CF1	860			54.24		29.13	0.22	0.01	0.02	10.73	5.46	0.1	0.03		99.93		2.45	1.55	0	0.01	0	0	0		0.52	0.48	0.01		5.02			51.77	47.65	0.59		0.518
BR GIC 10c	gabbro part	felsic segregation in upper gabbro	Line 2 GIC10CF1	861			54.45	0.01	29.08	0.13			10.7	5.53	0.08			99.99		2.46	1.55	0	0.01	0	0	0		0.52	0.48	0		5.01			51.45	48.07	0.48		0.515
BR GIC 10c	gabbro part	felsic segregation in upper gabbro	Line 3 GIC10CF1	862			52.59		30.16	0.07		0.01	12.12	4.66	0.07	0.01		99.68		2.39	1.61	0	0	0	0	0		0.59	0.41	0		5.01			58.74	40.84	0.42		0.587
BR GIC 10c	gabbro part	felsic segregation in upper gabbro	Line 4 GIC10CF1	863			49.41	0.03	32.44	0.08			14.86	3.07	0.03			99.92		2.26	1.75	0	0	0	0	0		0.73	0.27	0		5.01			72.68	27.16	0.16		0.727
BR GIC 10c	gabbro part	felsic segregation in upper gabbro	Line 5 GIC10CF1	864			50.14	0.07	32.19	0.09	0.04		14.37	3.32	0.06	0		100.26		2.28	1.72	0	0	0	0	0		0.7	0.29	0		5.01			70.28	29.4	0.32		0.703
BR GIC 10c	gabbro part	felsic segregation in upper gabbro	Line 6 GIC10CF1	865			51.72		31.26	0.1		0	13.13	3.98	0.08			100.27		2.34	1.67	0	0	0	0	0		0.64	0.35	0		5			64.3	35.22	0.48		0.643
BR GIC 10c	gabbro part	felsic segregation in upper gabbro	Line 7 GIC10CF1	866			51.43	0.02	31.1	0.12			13.01	4.01	0.06			99.72		2.34	1.67	0	0	0	0	0		0.63	0.35	0		5			64	35.68	0.32		0.64
BR GIC 10c	gabbro part	felsic segregation in upper gabbro	Line 8 GIC10CF1	867			51.12	0.01	31.55	0.14	0.01	0.01	13.24	3.82	0.05			99.95		2.32	1.69	0	0.01	0	0	0		0.64	0.34	0		5			65.51	34.2	0.29		0.655
BR GIC 10c	gabbro part	felsic segregation in upper gabbro	Line 9 GIC10CF1	868			52.93		29.89	0.17		0.01	11.68	4.87	0.12	0.02		99.69		2.4	1.6	0	0.01	0	0	0		0.57	0.43	0.01		5.01			56.62	42.67	0.7		0.566
BR GIC 10c	gabbro part	felsic segregation in upper gabbro	Line 10 GIC10CF1	869			53.41	0	29.79	0.15	0.03	0	11.43	4.87	0.09	0.03		99.8		2.42	1.59	0	0.01	0	0	0		0.55	0.43	0.01		5			56.16	43.33	0.51		0.562
BR GIC 10c	gabbro part	felsic segregation in upper gabbro	Line 1 GIC10CF1II	870			54.98		28.4	0.24	0		10.18	5.83	0.13			99.76		2.48	1.51	0	0.01	0	0	0		0.49	0.51	0.01		5.02			48.75	50.54	0.71		0.487
BR GIC 10c	gabbro part	felsic segregation in upper gabbro	Line 2 GIC10CF1II	871			52.6		29.84	0.17		0.01	11.45	4.89	0.1	0.03		99.07		2.4	1.61	0	0.01	0	0	0		0.56	0.43	0.01		5.01			56.1	43.35	0.55		0.561
BR GIC 10c	gabbro part	felsic segregation in upper gabbro	Line 3 GIC10CF1II	872			49.44	0.03	32.47	0.12			14.58	3.13	0.03			99.79		2.26	1.75	0	0	0	0	0		0.71	0.28	0		5.01			71.92	27.93	0.15		0.719
BR GIC 10c	gabbro part	felsic segregation in upper gabbro	Line 4 GIC10CF1II	873			49.26		32.37	0.08	0.02	0.02	14.28	3.21	0.06	0.02		99.3		2.26	1.75	0	0	0	0	0		0.7	0.29	0		5.01			70.86	28.82	0.32		0.709
BR GIC 10c	gabbro part	felsic segregation in upper gabbro	Line 5 GIC10CF1II	874			51.18		31.11	0.14	0.02		12.9	4.17	0.07			99.58		2.33	1.67	0	0.01	0	0	0		0.63	0.37	0		5.02			62.82	36.79	0.39		0.628
BR GIC 10c	gabbro part	felsic segregation in upper gabbro	Line 6 GIC10CF1II	875			50.89	0.14	30.42	0.59	0.01	0.31	12.47	4.08	0.33			99.23		2.34	1.65	0	0.02	0	0.02	0		0.61	0.36	0.02		5.03			61.56	36.5	1.94		0.616
BR GIC 10c	gabbro part	felsic segregation in upper gabbro	Line 7 GIC10CF1II	876			51.77	0.01	30.87	0.14			12.67	4.3	0.05			99.81		2.35	1.65	0	0.01	0	0	0		0.62	0.38	0		5.01			61.78	37.91	0.31		0.618
BR GIC 10c	gabbro part	felsic segregation in upper gabbro	Line 8 GIC10CF1II	877			56.42		27.76	0.28	0.03	0.01	9.02	6.53	0.09			100.14		2.53	1.47	0	0.01	0	0	0		0.43	0.57	0.01		5.02			43.07	56.41	0.52		0.431
BR GIC 10c	gabbro part	felsic segregation in upper gabbro	Line 1 GIC10CF2	878			56.62	0.01	27.74	0.1	0.01	0.02	9.09	6.34	0.08	0.04		100.05		2.54	1.47	0	0	0	0	0		0.44	0.55	0		5.01			43.99	55.54	0.48		0.44
BR GIC 10c	gabbro part	felsic segregation in upper gabbro	Line 2 GIC10CF2	879			57.86		26.77	0.09	0.04		7.91	7.25	0.11	0.04		100.07		2.59	1.41	0	0	0	0	0		0.38	0.63	0.01		5.02			37.38	61.99	0.64		0.374
BR GIC 10c	gabbro part	felsic segregation in upper gabbro	Line 3 GIC10CF2	880			53.75		29.32	0.12			10.98	5.14	0.13			99.45		2.44	1.57	0	0	0	0	0		0.53	0.45	0.01		5.01			53.72	45.51	0.76		0.537
BR GIC 10c	gabbro part	felsic segregation in upper gabbro	Line 4 GIC10CF2	881			52.1	0	30.46	0.08			12.36	4.38	0.08	0.02		99.47		2.37	1.63	0	0	0	0	0		0.6	0.39	0		5.01			60.65	38.91	0.44		0.607
BR GIC 10c	gabbro part	felsic segregation in upper gabbro	Line 5 GIC10CF2	882			50.86	0.01	31.07	0.26	0.06	0.13	13.07	3.97	0.19	0		99.62		2.32	1.67	0	0.01	0	0.01	0		0.64	0.35	0.01		5.02			63.82	35.05	1.13		0.638
BR GIC 10c	gabbro part	felsic segregation in upper gabbro	Line 6 GIC10CF2	883			50.77	0.01	31.46	0.12			13.61	3.7	0.05			99.72		2.31	1.69	0	0	0	0	0		0.66	0.33	0		5			66.82	32.91	0.26		0.668
BR GIC 10c	gabbro part	felsic segregation in upper gabbro	Line 7 GIC10CF2	884			50.24		31.67	0.08	0.02		13.87	3.46	0.04			99.38		2.3	1.71	0	0	0	0	0		0.68	0.31	0		5			68.74	31.03	0.23		0.687
BR GIC 10c	gabbro part	felsic segregation in upper gabbro	Line 8 GIC10CF2	885			50.14		32.01	0.06	0.06	0	14.07	3.52	0.05			99.92		2.29	1.72	0	0	0	0	0		0.69	0.31	0		5.01			68.66	31.08	0.26		0.687
BR GIC 10c	gabbro part	felsic segregation in upper gabbro	Line 9 GIC10CF2	886			50.22		31.7	0.08			13.81	3.66	0.1	0		99.57		2.3	1.71	0	0	0	0	0		0.68	0.32	0.01		5.01			67.18	32.25	0.57		0.672
BR GIC 10c	gabbro part	felsic segregation in upper gabbro	Line 10 GIC10CF2	887			49.35	0.04	32.45	0.13			14.56	3.13	0.04			99.71		2.26	1.75	0	0.01	0	0	0		0.71	0.28	0		5.01			71.81	27.93	0.26		0.718
BR GIC 10c	gabbro part	felsic segregation in upper gabbro	Line 11 GIC10CF2	888			49.58		32.12	0.11	0.01		14.32	3.19	0.06	0		99.4		2.27	1.74	0	0	0	0	0		0.7	0.28	0		5			71.04	28.63	0.33		0.71
BR GIC 10c	gabbro part	felsic segregation in upper gabbro	Line 12 GIC10CF2	889			50.76		31.52	0.05	0.02	0.01	13.59	3.61	0.06			99.61		2.31	1.69	0	0	0	0	0		0.66	0.32	0		5			67.32	32.35	0.33		0.673
BR GIC 10c	gabbro part	felsic segregation in upper gabbro	Line 13 GIC10CF2	890			51.4		30.83	0.06	0.02		13.08	4.15	0.07			99.62		2.34	1.66	0	0	0	0	0		0.64	0.37	0		5.01			63.28	36.31	0.4		0.633
BR GIC 10c	gabbro part	felsic segregation in upper gabbro	Line 14 GIC10CF2	891			53.01	0.03	29.74	0.07			11.74	4.89	0.11	0.05		99.62		2.41	1.59	0	0	0	0	0		0.57	0.43	0.01		5.01			56.68	42.7	0.62		0.567
BR GIC 10c	gabbro part	felsic segregation in upper gabbro	Line 15 GIC10CF2	892			54.38	0.03	29.12	0.11			10.61	5.57	0.1			99.92		2.46	1.55	0	0	0	0	0		0.51	0.49	0.01		5.02			50.97	48.45	0.58		0.51
BR GIC 10c	gabbro part	felsic segregation in upper gabbro	Line 1 GIC10CF23	893			57.32	0.05	26.85	0.08		0.02	8.28	6.92	0.14			99.65		2.58	1.42	0	0	0	0	0		0.4	0.6	0.01		5.02			39.49	59.72	0.8		0.395
BR GIC 10c	gabbro part	felsic segregation in upper gabbro	Line 2 GIC10CF23	894			57.1		27.28	0.07			8.76	6.65	0.14	0		100		2.56	1.44	0	0	0	0	0		0.42	0.58	0.01		5.01			41.79	57.41	0.81		0.418
BR GIC 10c	gabbro part	felsic segregation in upper gabbro	Line 3 GIC10CF23	895			54.04	0.01	29.25	0.08	0.02		10.97	5.26	0.12			99.76		2.44	1.56	0	0	0	0	0		0.53	0.46	0.01		5.01			53.15	46.14	0.71		0.531
BR GIC 10c	gabbro part	felsic segregation in upper gabbro	Line 4 GIC10CF23	896			49.74	0.02	32.27	0.09			14.58	3.2	0.05	0.01		99.96		2.27	1.73	0	0	0	0	0		0.71	0.28	0		5.01			71.34	28.34	0.31		0.713
BR GIC 10c	gabbro part	felsic segregation in upper gabbro	Line 5 GIC10CF23	897			50.18		31.99	0.11			14.34	3.3	0.05	0.05		100.01		2.29	1.72	0	0	0	0	0		0.7	0.29	0		5			70.41	29.3	0.29		0.704
BR GIC 10c	gabbro part	felsic segregation in upper gabbro	Line 6 GIC10CF23	898			49.97	0.02	32.32	0.1	0.01		14.41	3.34	0.06			100.23		2.27	1.73	0	0	0	0	0		0.7	0.29	0		5.01			70.23	29.42	0.35		0.702
BR GIC 10c	gabbro part	felsic segregation in upper gabbro	Line 7 GIC10CF23	899			52.48	0.03	30.42	0.09	0.02	0.02	12.3	4.52	0.08			99.95		2.38	1.63	0	0	0	0	0		0.6	0.4	0		5.01			59.78	39.74	0.49		0.598
BR GIC 10c	gabbro part	felsic segregation in upper gabbro	Line 8 GIC10CF23	900			55.03		28.45	0.06		0.01	10.15	5.69	0.1	0.04		99.52		2.49	1.52	0	0	0	0	0		0.49	0.5	0.01		5			49.37	50.06	0.57		0.494
BR GIC 10c	gabbro part	felsic segregation in upper gabbro	Line 9 GIC10CF23	901			57.08	0.01	27.3	0.08		0.01	8.76	6.69	0.14	0.03		100.1		2.56	1.44	0	0	0	0	0		0.42	0.58	0.01		5.01			41.66	57.54	0.8		0.417
BR GIC 10c	gabbro part	felsic segregation in upper gabbro	Line 10 GIC10CF23	902			56.82	0.02	27.47	0.11	0.04		8.9	6.45	0.13			99.93		2.55	1.45	0	0	0	0	0		0.43	0.56	0.01		5.01			42.96	56.31	0.73		0.43
																																			0	0	0		0
BRGIC11	segregation	felsic segregation in upper gabbro	Line 1	534			62.69		23.82	0.07	0		4.55	9.17	0.16	0.01		100.47		2.76	1.24	0	0	0	0	0		0.22	0.78	0.01		5.01			21.35	77.79	0.87		0.213
BRGIC11	segregation	felsic segregation in upper gabbro	Line 2p	535			62.95	0.02	23.9	0.06	0.01		4.53	9.18	0.12			100.78		2.77	1.24	0	0	0	0	0		0.21	0.78	0.01		5.01			21.29	78.01	0.69		0.213
BRGIC11	segregation	felsic segregation in upper gabbro	Line 3p	536			62.41	0.01	23.71	0.08	0.02	0.01	4.49	9	0.19	0.07		99.99		2.77	1.24	0	0	0	0	0		0.21	0.77	0.01		5.01			21.36	77.56	1.08		0.214
BRGIC11	segregation	felsic segregation in upper gabbro	Line 4p	537			62.46	0.03	24.07	0.06			4.67	9.09	0.19	0.03		100.59		2.75	1.25	0	0	0	0	0		0.22	0.78	0.01		5.01			21.88	77.06	1.05		0.219
BRGIC11	segregation	felsic segregation in upper gabbro	Line 5p	538			62.54	0.07	24.37	0.04			4.82	9.06	0.16			101.07		2.74	1.26	0	0	0	0	0		0.23	0.77	0.01		5.01			22.54	76.56	0.91		0.225
BRGIC11	segregation	felsic segregation in upper gabbro	Line 6p	539			62.24	0	24.24	0.08	0.01		5.06	8.87	0.21	0		100.72		2.74	1.26	0	0	0	0	0		0.24	0.76	0.01		5.01			23.7	75.12	1.18		0.237
BRGIC11	segregation	felsic segregation in upper gabbro	Line 7p	540			61.97	0.02	24.51	0.12	0.02		5.18	8.62	0.22	0.1		100.78		2.73	1.27	0	0	0	0	0		0.24	0.74	0.01		5.01			24.62	74.12	1.26		0.246
BRGIC11	segregation	felsic segregation in upper gabbro	Line 8p	541			60.75	0.05	25.59	0.06			6.39	7.9	0.2			100.94		2.68	1.33	0	0	0	0	0		0.3	0.68	0.01		5			30.53	68.32	1.16		0.305
BRGIC11	segregation	felsic segregation in upper gabbro	Line 9p	542			61.16	0.03	25.83	0.1		0.03	6.61	8.27	0.22	0		102.24		2.67	1.33	0	0	0	0	0		0.31	0.7	0.01		5.02			30.27	68.53	1.21		0.303
BRGIC11	segregation	felsic segregation in upper gabbro	Line 10p	543			60.8	0	25.22	0.04		0.01	6.21	8.28	0.16	0.02		100.74		2.69	1.31	0	0	0	0	0		0.29	0.71	0.01		5.02			29.05	70.05	0.9		0.291
BRGIC11	segregation	felsic segregation in upper gabbro	Line 11p	544			62.51	0.04	24.35	0.07		0.01	4.98	8.88	0.2	0.02		101.07		2.74	1.26	0	0	0	0	0		0.23	0.76	0.01		5.01			23.39	75.48	1.12		0.234
BRGIC11	segregation	felsic segregation in upper gabbro	Line 12	545			61.98		24.4	0.03	0.03		5.2	8.67	0.14			100.46		2.74	1.27	0	0	0	0	0		0.25	0.74	0.01		5			24.69	74.5	0.81		0.247
BRGIC11	segregation	felsic segregation in upper gabbro	Line 13	546			61.43		24.25	0.1			5.16	8.81	0.25	0.01		100.01		2.73	1.27	0	0	0	0	0		0.25	0.76	0.01		5.02			24.13	74.49	1.38		0.241
BRGIC11	segregation	felsic segregation in upper gabbro	Line 14	547			61.88	0	24.39	0.06		0.01	5.06	8.82	0.25	0.01		100.49		2.73	1.27	0	0	0	0	0		0.24	0.76	0.01		5.02			23.71	74.87	1.42		0.237
BRGIC11	segregation	felsic segregation in upper gabbro	Line 15	548			62.48	0.02	24.27	0.07			4.95	8.86	0.21			100.85		2.75	1.26	0	0	0	0	0		0.23	0.76	0.01		5.01			23.31	75.53	1.16		0.233
BRGIC11	segregation	felsic segregation in upper gabbro	Line 16	549			62.53		24.21	0.1	0.04		4.74	9.02	0.2			100.84		2.75	1.25	0	0	0	0	0		0.22	0.77	0.01		5.01			22.24	76.64	1.12		0.222
BRGIC11	segregation	felsic segregation in upper gabbro	Line 17	550			62.65	0.02	23.91	0.07	0		4.75	9.18	0.2	0.04		100.82		2.76	1.24	0	0	0	0	0		0.22	0.78	0.01		5.02			22	76.9	1.1		0.22
BRGIC11	segregation	felsic segregation in upper gabbro	Line 18	551			63.43	0.04	23.81	0.06	0.01		4.44	9.31	0.2	0.07		101.36		2.77	1.23	0	0	0	0	0		0.21	0.79	0.01		5.01			20.64	78.27	1.09		0.206
BRGIC11	segregation	felsic segregation in upper gabbro	Line 19	552			63.16	0	23.6	0.04	0.01		4.24	9.48	0.13	0		100.66		2.78	1.22	0	0	0	0	0		0.2	0.81	0.01		5.02			19.67	79.62	0.72		0.197
BRGIC11	segregation	felsic segregation in upper gabbro	Line 20	553			63.37	0.03	23.59	0.06	0		4.2	9.71	0.08			101.05		2.78	1.22	0	0	0	0	0		0.2	0.83	0		5.03			19.21	80.38	0.41		0.192
BRGIC11	segregation	felsic segregation in upper gabbro	116 1	554			59.05		26.66	0.09			7.69	7.35	0.17			101.01		2.61	1.39	0	0	0	0	0		0.36	0.63	0.01		5.01			36.29	62.78	0.93		0.363
BRGIC11	segregation	felsic segregation in upper gabbro	116 2	555			63.29	0.04	23.82	0.05	0.03		4.41	9.28	0.13			101.05		2.77	1.23	0	0	0	0	0		0.21	0.79	0.01		5.01			20.65	78.64	0.71		0.207
BRGIC11	segregation	felsic segregation in upper gabbro	116 3	556			58.85	0.03	26.36	0.06			7.52	7.36	0.16			100.33		2.62	1.38	0	0	0	0	0		0.36	0.64	0.01		5.01			35.74	63.37	0.88		0.357
BRGIC11	segregation	felsic segregation in upper gabbro	116 4	557			62.57	0.01	24.41	0.07	0.01		5.09	8.8	0.16	0.1		101.22		2.74	1.26	0	0	0	0	0		0.24	0.75	0.01		5			24	75.08	0.92		0.24
BRGIC11	segregation	felsic segregation in upper gabbro	Line 1p	558			62.48	0.05	23.85	0.33	0		4.46	9.13	0.17			100.48		2.76	1.24	0	0.01	0	0	0		0.21	0.78	0.01		5.02			21.04	77.99	0.96		0.21
BRGIC11	segregation	felsic segregation in upper gabbro	Line 2p	559			62.58	0.06	23.84	0.25			4.47	9.04	0.2			100.42		2.76	1.24	0	0.01	0	0	0		0.21	0.77	0.01		5.01			21.21	77.68	1.1		0.212
BRGIC11	segregation	felsic segregation in upper gabbro	Line 3p	560			62.38		23.96	0.19	0.01		4.73	8.94	0.25	0.03		100.49		2.75	1.25	0	0.01	0	0	0		0.22	0.77	0.01		5.01			22.32	76.29	1.39		0.223
BRGIC11	segregation	felsic segregation in upper gabbro	Line 4p	561			62.89	0.06	24.42	0.12	0.02	0	4.84	9.2	0.24			101.79		2.74	1.26	0	0	0	0	0		0.23	0.78	0.01		5.02			22.24	76.45	1.31		0.222
BRGIC11	segregation	felsic segregation in upper gabbro	Line 5p	562			62.27	0	24.29	0.08		0.01	5.02	8.97	0.23			100.86		2.74	1.26	0	0	0	0	0		0.24	0.77	0.01		5.02			23.3	75.44	1.26		0.233
BRGIC11	segregation	felsic segregation in upper gabbro	Line 6p	563			62.37		24.39	0.08		0.01	5.08	8.71	0.28	0.03		100.95		2.74	1.26	0	0	0	0	0		0.24	0.74	0.02		5.01			23.99	74.44	1.56		0.24
BRGIC11	segregation	felsic segregation in upper gabbro	Line 7p	564			62.15		24.25	0.09	0.02		5.03	8.69	0.29			100.53		2.74	1.26	0	0	0	0	0		0.24	0.74	0.02		5.01			23.82	74.53	1.65		0.238
BRGIC11	segregation	felsic segregation in upper gabbro	Line 8p	565			60.43		25.56	0.08	0.01		6.35	8.02	0.26			100.7		2.67	1.33	0	0	0	0	0		0.3	0.69	0.01		5.01			29.97	68.56	1.47		0.3
BRGIC11	segregation	felsic segregation in upper gabbro	Line 9p	566			60.28	0.02	25.47	0.09			6.46	7.84	0.23	0.04		100.43		2.67	1.33	0	0	0	0	0		0.31	0.67	0.01		5			30.86	67.82	1.32		0.309
BRGIC11	segregation	felsic segregation in upper gabbro	Line 10	567			60.61		25.26	0.12	0.02	0.01	6.17	8.11	0.22	0.03		100.55		2.68	1.32	0	0	0	0	0		0.29	0.7	0.01		5.01			29.2	69.54	1.25		0.292
BRGIC11	segregation	felsic segregation in upper gabbro	Line 11	568			61.63		24.86	0.11		0	5.77	8.44	0.24			101.05		2.71	1.29	0	0	0	0	0		0.27	0.72	0.01		5.01			27.08	71.6	1.33		0.271
BRGIC11	segregation	felsic segregation in upper gabbro	Line 12	569			61.94	0	24.3	0.13		0	4.84	8.87	0.19			100.29		2.74	1.27	0	0	0	0	0		0.23	0.76	0.01		5.01			22.92	75.99	1.09		0.229
BRGIC11	segregation	felsic segregation in upper gabbro	Line 13	570			62.27	0.01	24.35	0.1	0.02		4.96	8.79	0.23			100.73		2.74	1.26	0	0	0	0	0		0.23	0.75	0.01		5.01			23.48	75.23	1.28		0.235
BRGIC11	segregation	felsic segregation in upper gabbro	Line 14	571			62.11	0.02	24.41	0.07	0.02	0.02	5.06	8.76	0.25			100.73		2.74	1.27	0	0	0	0	0		0.24	0.75	0.01		5.01			23.87	74.75	1.39		0.239
BRGIC11	segregation	felsic segregation in upper gabbro	Line 15	572			62.24		24.29	0.09			5.02	8.76	0.27			100.67		2.74	1.26	0	0	0	0	0		0.24	0.75	0.02		5.01			23.67	74.79	1.54		0.237
BRGIC11	segregation	felsic segregation in upper gabbro	Line 16	573			61.64		24.91	0.05	0.01		5.57	8.39	0.25			100.81		2.71	1.29	0	0	0	0	0		0.26	0.72	0.01		5			26.46	72.15	1.39		0.265
BRGIC11	segregation	felsic segregation in upper gabbro	Line 17	574			62.57	0.02	24.36	0.02			4.96	8.66	0.32			100.92		2.75	1.26	0	0	0	0	0		0.23	0.74	0.02		5			23.6	74.58	1.82		0.236
BRGIC11	segregation	felsic segregation in upper gabbro	Line 18	575			60.66		25.45	0.05			6.16	8.24	0.27			100.82		2.68	1.32	0	0	0	0	0		0.29	0.71	0.01		5.02			28.8	69.71	1.48		0.288
BRGIC11	segregation	felsic segregation in upper gabbro	Line 19	576			61.3	0.04	25.22	0.08	0.03		5.96	8.3	0.26	0.01		101.19		2.7	1.31	0	0	0	0	0		0.28	0.71	0.01		5.01			28.01	70.57	1.43		0.28
BRGIC11	segregation	felsic segregation in upper gabbro	Line 20	577			63.02		23.74	0.07	0.04	0.01	4.42	9.04	0.26	0.02		100.62		2.77	1.23	0	0	0	0	0		0.21	0.77	0.01		5			20.96	77.55	1.49		0.21
BRGIC11	segregation	felsic segregation in upper gabbro	Line 21	578			62.31	0.01	24.37	0.09		0.02	5.22	8.8	0.15			100.96		2.74	1.26	0	0	0	0	0		0.25	0.75	0.01		5.01			24.46	74.71	0.83		0.245
BRGIC11	segregation	felsic segregation in upper gabbro	Line 22	579			62.3		24.43	0.1	0.02		4.95	8.8	0.18	0.06		100.84		2.74	1.27	0	0	0	0	0		0.23	0.75	0.01		5.01			23.46	75.54	0.99		0.235
BRGIC11	segregation	felsic segregation in upper gabbro	Line 23	580			62.27	0.02	24.29	0.12	0	0	4.86	8.91	0.18			100.63		2.74	1.26	0	0	0	0	0		0.23	0.76	0.01		5.01			22.93	76.07	1		0.229
BRGIC11	segregation	felsic segregation in upper gabbro	Line 24	581			62.58	0.02	23.97	0.08	0.01		4.64	9.08	0.18			100.54		2.76	1.25	0	0	0	0	0		0.22	0.78	0.01		5.01			21.79	77.19	1.02		0.218
BRGIC11	segregation	felsic segregation in upper gabbro	Line 25	582			62.19	0.05	23.62	0.13			4.45	9.14	0.18			99.75		2.76	1.24	0	0	0	0	0		0.21	0.79	0.01		5.02			21	78.02	0.98		0.21
BRGIC11	segregation	felsic segregation in upper gabbro	115b 1	583			59.12		26.98	0.05	0	0.01	7.92	7.13	0.17			101.38		2.61	1.4	0	0	0	0	0		0.37	0.61	0.01		5			37.65	61.4	0.95		0.377
BRGIC11	segregation	felsic segregation in upper gabbro	115b 2	584			58.2	0.06	26.91	0.05	0.02		8.04	7.09	0.2	0.04		100.61		2.59	1.41	0	0	0	0	0		0.38	0.61	0.01		5.01			38.12	60.77	1.11		0.381
BRGIC11	segregation	felsic segregation in upper gabbro	115b 3	585			57.85	0.01	27.28	0.09			8.3	6.99	0.17			100.7		2.57	1.43	0	0	0	0	0		0.4	0.6	0.01		5.02			39.24	59.79	0.97		0.392
BRGIC11	segregation	felsic segregation in upper gabbro	115b 4	586			57.39		28.32	0.07	0.01		9.41	6.34	0.16			101.69		2.53	1.47	0	0	0	0	0		0.45	0.54	0.01		5.01			44.68	54.45	0.88		0.447
BRGIC11	segregation	felsic segregation in upper gabbro	115b 5	587			57.51	0.02	27.77	0.04	0.01		8.99	6.55	0.13	0.04		101.07		2.55	1.45	0	0	0	0	0		0.43	0.56	0.01		5.01			42.81	56.46	0.73		0.428
BRGIC11	segregation	felsic segregation in upper gabbro	115b 6	588			62.3		24.59	0.11	0.01		5.24	8.69	0.19	0.01		101.15		2.73	1.27	0	0	0	0	0		0.25	0.74	0.01		5.01			24.74	74.19	1.07		0.247
BRGIC11	segregation	felsic segregation in upper gabbro	115b 7	589			62.68		24.68	0.13	0.03		5.32	8.82	0.18			101.85		2.73	1.27	0	0	0	0	0		0.25	0.75	0.01		5.01			24.73	74.25	1.02		0.247
BRGIC11	segregation	felsic segregation in upper gabbro	112 1	592			65.01	0.03	18.92	0.03			0.01	0.88	16.22			101.1		2.98	1.02	0	0	0	0	0		0	0.08	0.95		5.02			0.07	7.61	92.32		0.001
BRGIC11	segregation	felsic segregation in upper gabbro	112 2	593			68.68	0.01	20.26				0.13	11.6	0.1			100.78		2.98	1.03	0	0	0	0	0		0.01	0.97	0.01		5			0.6	98.86	0.54		0.006
BRGIC11	segregation	felsic segregation in upper gabbro	112 3	594			66.68		21.39	0.01	0	0.01	1.6	10.69	0.09			100.48		2.91	1.1	0	0	0	0	0		0.07	0.9	0.01		5			7.61	91.87	0.52		0.076
BRGIC11	segregation	felsic segregation in upper gabbro	112 4	595			68.61	0.03	20.55	0.02	0.01		0.23	11.76	0.07			101.28		2.96	1.05	0	0	0	0	0		0.01	0.98	0		5.01			1.08	98.55	0.37		0.011
BRGIC11	segregation	felsic segregation in upper gabbro	112 5	596			67.6		20.62	0.02	0.02	0	0.72	11.4	0.07	0.1		100.55		2.95	1.06	0	0	0	0	0		0.03	0.96	0		5.01			3.36	96.27	0.37		0.034
BRGIC11	segregation	felsic segregation in upper gabbro	112 6	597			64.66	0	18.87	0.08			0.05	0.81	16.27	0.01		100.74		2.97	1.02	0	0	0	0	0		0	0.07	0.95		5.03			0.24	7	92.75		0.002
BRGIC11	segregation	felsic segregation in upper gabbro	112 7	598			64.37	0	18.88	0.09			0.06	0.8	16.17	0.02		100.4		2.97	1.03	0	0	0	0	0		0	0.07	0.95		5.03			0.3	6.94	92.76		0.003
BRGIC11	segregation	felsic segregation in upper gabbro	112b 2	600			63.92		23.28	0.04		0.01	3.68	9.83	0.16	0.06		100.98		2.8	1.2	0	0	0	0	0		0.17	0.84	0.01		5.02			16.99	82.12	0.88		0.17
BRGIC11	segregation	felsic segregation in upper gabbro	112b 3	601			64.72		23.09	0.04			3.41	9.86	0.08	0.04		101.24		2.82	1.19	0	0	0	0	0		0.16	0.83	0		5.01			15.99	83.58	0.43		0.16
BRGIC11	segregation	felsic segregation in upper gabbro	112b 4	602			64.73	0.02	23.24	0.01	0	0.01	3.43	9.78	0.12	0.03		101.37		2.82	1.19	0	0	0	0	0		0.16	0.82	0.01		5			16.14	83.21	0.65		0.161
BRGIC11	segregation	felsic segregation in upper gabbro	112b 5	603			64.48	0.03	22.71	0.02		0.01	3.04	9.97	0.1	0		100.35		2.83	1.18	0	0	0	0	0		0.14	0.85	0.01		5.01			14.32	85.14	0.54		0.143
BRGIC11	segregation	felsic segregation in upper gabbro	112b 6	604			64.89	0.02	18.7	0.01	0.02	0	0.02	0.51	16.64			100.83		2.98	1.01	0	0	0	0	0		0	0.05	0.98		5.02			0.12	4.46	95.42		0.001
BRGIC11	segregation	felsic segregation in upper gabbro	112b 7	605			65.3		22.74	0.05	0.01	0.01	3.03	10.15	0.11	0.01		101.41		2.84	1.17	0	0	0	0	0		0.14	0.86	0.01		5.01			14.06	85.32	0.61		0.141
BRGIC11	segregation	felsic segregation in upper gabbro	113 6	610			65.74	0.02	21.96	0.1		0	2.27	10.67	0.18			100.93		2.87	1.13	0	0	0	0	0		0.11	0.9	0.01		5.02			10.4	88.6	1.01		0.104
BRGIC11	segregation	felsic segregation in upper gabbro	113 7	611			64.85	0.01	22.56	0.05			2.92	10.1	0.21			100.71		2.84	1.16	0	0	0	0	0		0.14	0.86	0.01		5.01			13.62	85.2	1.18		0.136
BRGIC11	segregation	felsic segregation in upper gabbro	113 8	612			64.66		22.88	0.07			3.33	9.93	0.17	0.06		101.1		2.82	1.18	0	0	0	0	0		0.16	0.84	0.01		5.01			15.49	83.58	0.93		0.155
BRGIC11	segregation	felsic segregation in upper gabbro	113 9	613			65.26		22.68	0.04	0.01	0.02	2.97	10.4	0.15	0.07		101.58		2.84	1.16	0	0	0	0	0		0.14	0.88	0.01		5.02			13.53	85.66	0.81		0.135
BRGIC11	segregation	felsic segregation in upper gabbro	113 10	614			65.03		22.69		0.02	0.01	3.11	9.97	0.09			100.92		2.84	1.17	0	0	0	0	0		0.15	0.84	0.01		5			14.62	84.87	0.5		0.146
																																			0	0	0		0
BR GIC 8	pyroxene gabbro	upper gabbro	Line 1p	508			59.09	0.05	26.47	0.34	0.01	0.01	7.75	6.99	0.44			101.16		2.62	1.38	0	0.01	0	0	0		0.37	0.6	0.03		5			37.04	60.43	2.53		0.37
BR GIC 8	pyroxene gabbro	upper gabbro	Line 2p	509			59.06	0.01	26.28	0.18			7.43	7.06	0.42	0.03		100.47		2.63	1.38	0	0.01	0	0	0		0.35	0.61	0.02		5			35.9	61.71	2.4		0.359
BR GIC 8	pyroxene gabbro	upper gabbro	Line 3p	510			59.29	0.03	25.99	0.1	0.04	0.02	7.44	7	0.42			100.33		2.64	1.36	0	0	0	0	0		0.35	0.6	0.02		4.99			36.1	61.45	2.45		0.361
BR GIC 8	pyroxene gabbro	upper gabbro	Line 4p	511			59.77	0.06	25.76	0.09			7.05	7.45	0.44	0.02		100.63		2.65	1.35	0	0	0	0	0		0.33	0.64	0.02		5.01			33.47	64.06	2.47		0.335
BR GIC 8	pyroxene gabbro	upper gabbro	Line 5p	512			59.27	0.06	25.91	0.1			7.34	7.23	0.43			100.33		2.64	1.36	0	0	0	0	0		0.35	0.62	0.02		5			35.07	62.49	2.44		0.351
BR GIC 8	pyroxene gabbro	upper gabbro	Line 6p	513			59.12	0.05	26.13	0.13	0.03		7.45	7.02	0.44			100.36		2.63	1.37	0	0	0	0	0		0.36	0.61	0.02		5			36.02	61.45	2.53		0.36
BR GIC 8	pyroxene gabbro	upper gabbro	Line 7p	514			60.39	0.02	25.38	0.13	0.01	0.02	6.74	7.4	0.49			100.58		2.68	1.33	0	0	0	0	0		0.32	0.64	0.03		4.99			32.56	64.61	2.83		0.326
BR GIC 8	pyroxene gabbro	upper gabbro	Line 8p	515			60.1	0.02	25.48	0.11			6.98	7.36	0.51			100.55		2.67	1.33	0	0	0	0	0		0.33	0.63	0.03		5			33.38	63.71	2.92		0.334
BR GIC 8	pyroxene gabbro	upper gabbro	Line 9p	516			58.56	0.04	26.18	0.1	0.01		7.76	6.92	0.43			100		2.62	1.38	0	0	0	0	0		0.37	0.6	0.02		5			37.32	60.24	2.44		0.373
BR GIC 8	pyroxene gabbro	upper gabbro	Line 10p	517			58.05		26.33	0.09			8.03	6.58	0.36			99.43		2.61	1.4	0	0	0	0	0		0.39	0.57	0.02		4.99			39.44	58.47	2.09		0.394
BR GIC 8	pyroxene gabbro	upper gabbro	83 1	518			58.38		26.68	0.13		0.01	8	6.84	0.35	0.05		100.44		2.6	1.4	0	0	0	0	0		0.38	0.59	0.02		5			38.47	59.52	2.02		0.385
BR GIC 8	pyroxene gabbro	upper gabbro	83 2	519			59.94	0.01	25.74	0.13	0.02	0	6.83	7.36	0.46	0.01		100.51		2.66	1.35	0	0	0	0	0		0.32	0.63	0.03		5			33	64.36	2.64		0.33
BR GIC 8	pyroxene gabbro	upper gabbro	83 3	520			58.34	0.03	26.32	0.11	0		7.77	6.89	0.44	0.06		99.96		2.61	1.39	0	0	0	0	0		0.37	0.6	0.02		5			37.42	60.07	2.51		0.374
BR GIC 8	pyroxene gabbro	upper gabbro	83 4	521			58.39		26.55	0.13	0.03		8.01	6.74	0.45	0.02		100.32		2.61	1.4	0	0	0	0	0		0.38	0.58	0.03		5			38.64	58.79	2.57		0.386
BR GIC 8	pyroxene gabbro	upper gabbro	83 5	522			58.87	0.02	26.29	0.07		0.01	7.77	6.9	0.33			100.24		2.62	1.38	0	0	0	0	0		0.37	0.6	0.02		4.99			37.65	60.47	1.87		0.377
																																			0	0	0		0
BR GIC 9A	amphibole gabbro	upper gabbro	Line 1 GIC9AF1	3			51.86	0.02	31	0.13			12.6	4.1	0.08			99.79		2.35	1.66	0	0	0	0	0		0.61	0.36	0		5			62.61	36.9	0.49		0.626
BR GIC 9A	amphibole gabbro	upper gabbro	Line 2 GIC9AF1	4			51.65	0.01	31.19	0.09	0.01	0.01	12.87	4.06	0.03	0.01		99.92		2.34	1.67	0	0	0	0	0		0.63	0.36	0		5			63.58	36.26	0.16		0.636
BR GIC 9A	amphibole gabbro	upper gabbro	Line 3 GIC9AF1	5			50.42	0	31.96	0.1		0.01	13.96	3.36	0.04			99.85		2.3	1.72	0	0	0	0	0		0.68	0.3	0		5			69.48	30.29	0.23		0.695
BR GIC 9A	amphibole gabbro	upper gabbro	Line 4 GIC9AF1	6			49.59	0.07	32.05	0.11		0.01	14.19	3.2	0.04			99.25		2.27	1.73	0	0	0	0	0		0.7	0.28	0		5			70.87	28.92	0.21		0.709
BR GIC 9A	amphibole gabbro	upper gabbro	Line 5 GIC9AF1	7			49.66		32.32	0.03	0.02	0.01	14.27	3.07	0.05			99.42		2.27	1.74	0	0	0	0	0		0.7	0.27	0		4.99			71.74	27.95	0.31		0.717
BR GIC 9A	amphibole gabbro	upper gabbro	Line 6 GIC9AF1	8			49.97	0.04	32.29	0.1			14.23	3.29	0.05			99.96		2.28	1.73	0	0	0	0	0		0.69	0.29	0		5			70.28	29.42	0.29		0.703
BR GIC 9A	amphibole gabbro	upper gabbro	Line 7 GIC9AF1	9			50.05	0.04	32.04	0.07	0.02		13.94	3.38	0.09			99.62		2.29	1.72	0	0	0	0	0		0.68	0.3	0.01		5			69.16	30.33	0.51		0.692
BR GIC 9A	amphibole gabbro	upper gabbro	Line 8 GIC9AF1	10			49.24	0.05	32.39	0.09			14.33	3.21	0.03			99.34		2.26	1.75	0	0	0	0	0		0.7	0.29	0		5.01			71.07	28.76	0.17		0.711
BR GIC 9A	amphibole gabbro	upper gabbro	Line 9 GIC9AF1	11			49.86	0.07	32.3	0.09	0.01		14.5	3.17	0.06			100.05		2.27	1.73	0	0	0	0	0		0.71	0.28	0		5			71.44	28.24	0.32		0.714
BR GIC 9A	amphibole gabbro	upper gabbro	Line 10 GIC9AF1	12			49.51	0.04	32.32	0.09	0.02	0.02	14.47	3.11	0.03			99.6		2.27	1.74	0	0	0	0	0		0.71	0.28	0		5			71.9	27.95	0.15		0.719
BR GIC 9A	amphibole gabbro	upper gabbro	Line 11 GIC9AF1	13			49.54		31.99	0.12			14.08	3.39	0.06	0.02		99.2		2.28	1.73	0	0	0	0	0		0.69	0.3	0		5.01			69.41	30.27	0.33		0.694
BR GIC 9A	amphibole gabbro	upper gabbro	Line 12 GIC9AF1	14			50.95		31.59	0.06	0.01	0	13.51	3.64	0.04	0.04		99.85		2.32	1.69	0	0	0	0	0		0.66	0.32	0		5			67.02	32.72	0.26		0.67
BR GIC 9A	amphibole gabbro	upper gabbro	Line 13 GIC9AF1	15			51.36	0.03	31.16	0.1	0		12.86	4.03	0.06	0		99.6		2.34	1.67	0	0	0	0	0		0.63	0.36	0		5			63.62	36.05	0.33		0.636
BR GIC 9A	amphibole gabbro	upper gabbro	Line 14 GIC9AF1	16			51.85	0.01	30.43	0.09	0.01		12.18	4.39	0.09			99.06		2.37	1.64	0	0	0	0	0		0.6	0.39	0.01		5.01			60.19	39.28	0.53		0.602
BR GIC 9A	amphibole gabbro	upper gabbro	Line 15 GIC9AF1	17			52.5		30.55	0.09	0.02		12.12	4.45	0.08			99.8		2.38	1.63	0	0	0	0	0		0.59	0.39	0		5			59.78	39.77	0.45		0.598
BR GIC 9A	amphibole gabbro	upper gabbro	Line 1 GIC9AF2	830			52.81	0.04	30.41	0.21			11.98	4.61	0.05			100.1		2.39	1.62	0	0.01	0	0	0		0.58	0.4	0		5			58.81	40.91	0.28		0.588
BR GIC 9A	amphibole gabbro	upper gabbro	Line 2 GIC9AF2	831			52.03	0.01	30.74	0.1		0	12.5	4.15	0.08			99.61		2.37	1.65	0	0	0	0	0		0.61	0.37	0		5			62.18	37.35	0.47		0.622
BR GIC 9A	amphibole gabbro	upper gabbro	Line 3 GIC9AF2	832			53.72	0.03	29.68	0.07	0.03		11.36	4.9	0.12			99.91		2.43	1.58	0	0	0	0	0		0.55	0.43	0.01		5			55.77	43.53	0.7		0.558
BR GIC 9A	amphibole gabbro	upper gabbro	Line 4 GIC9AF2	833			52.91	0.02	29.9	0.08		0.01	11.76	4.74	0.07	0.04		99.52		2.4	1.6	0	0	0	0	0		0.57	0.42	0		5			57.61	41.98	0.41		0.576
BR GIC 9A	amphibole gabbro	upper gabbro	Line 5 GIC9AF2	834			52.32		30.43	0.08			12.29	4.47	0.08			99.67		2.38	1.63	0	0	0	0	0		0.6	0.39	0		5.01			60.02	39.54	0.44		0.6
BR GIC 9A	amphibole gabbro	upper gabbro	Line 6 GIC9AF2	835			51.16	0.05	31.45	0.1			13.41	3.76	0.08	0.01		100.01		2.32	1.68	0	0	0	0	0		0.65	0.33	0		5			66.06	33.49	0.46		0.661
BR GIC 9A	amphibole gabbro	upper gabbro	Line 7 GIC9AF2	836			50.06	0.07	32.25	0.09			14.37	3.25	0.08			100.17		2.28	1.73	0	0	0	0	0		0.7	0.29	0		5			70.59	28.93	0.48		0.706
BR GIC 9A	amphibole gabbro	upper gabbro	Line 8 GIC9AF2	837			49.45		32.28	0.29	0.03	0.08	14.16	3.12	0.06			99.48		2.27	1.74	0	0.01	0	0.01	0		0.7	0.28	0		5			71.25	28.42	0.34		0.712
BR GIC 9A	amphibole gabbro	upper gabbro	Line 9 GIC9AF2	838			49.97	0.01	32.18	0.09		0.01	14.23	3.33	0.06	0.07		99.95		2.28	1.73	0	0	0	0	0		0.7	0.29	0		5.01			69.98	29.64	0.37		0.7
BR GIC 9A	amphibole gabbro	upper gabbro	Line 10 GIC9AF2	839			51.39	0.03	31.64	0.25	0.03	0.03	13.28	3.81	0.07	0.04		100.58		2.32	1.69	0	0.01	0	0	0		0.64	0.33	0		5			65.51	34.06	0.43		0.655
BR GIC 9A	amphibole gabbro	upper gabbro	Line 1 GIC9AF2I	840			50.14	0.07	32.25	0.14		0.02	14.23	3.29	0.05			100.17		2.28	1.73	0	0.01	0	0	0		0.69	0.29	0		5			70.32	29.38	0.29		0.703
BR GIC 9A	amphibole gabbro	upper gabbro	Line 2 GIC9AF2I	841			50.11	0.03	32.24	0.12			14.25	3.36	0.05			100.14		2.28	1.73	0	0	0	0	0		0.69	0.3	0		5.01			69.91	29.8	0.29		0.699
BR GIC 9A	amphibole gabbro	upper gabbro	Line 3 GIC9AF2I	842			50.44	0.01	31.99	0.07			13.92	3.47	0.08			99.98		2.29	1.72	0	0	0	0	0		0.68	0.31	0		5			68.61	30.95	0.45		0.686
BR GIC 9A	amphibole gabbro	upper gabbro	Line 4 GIC9AF2I	843			51.1		31.47	0.11		0	13.46	3.73	0.06			99.94		2.32	1.69	0	0	0	0	0		0.66	0.33	0		5			66.33	33.29	0.38		0.663
BR GIC 9A	amphibole gabbro	upper gabbro	Line 5 GIC9AF2I	844			53.61	0.02	29.8	0.07	0.03	0.01	11.32	4.92	0.09	0.02		99.88		2.42	1.59	0	0	0	0	0		0.55	0.43	0.01		5			55.66	43.83	0.52		0.557
BR GIC 9A	amphibole gabbro	upper gabbro	Line 6 GIC9AF2I	845			55.22	0.02	28.84	0.07	0.02	0.02	10.44	5.6	0.1			100.32		2.48	1.53	0	0	0	0	0		0.5	0.49	0.01		5			50.47	48.97	0.55		0.505
BR GIC 9A	amphibole gabbro	upper gabbro	Line 7 GIC9AF2I	846			54.35	0.04	29.06	0.08			10.7	5.37	0.08			99.69		2.46	1.55	0	0	0	0	0		0.52	0.47	0		5			52.13	47.38	0.48		0.521
BR GIC 9A	amphibole gabbro	upper gabbro	Line 8 GIC9AF2I	847			54.81	0.01	29.31	0.05			10.67	5.43	0.08			100.36		2.46	1.55	0	0	0	0	0		0.51	0.47	0		5			51.85	47.69	0.46		0.518
BR GIC 9A	amphibole gabbro	upper gabbro	Line 9 GIC9AF2I	848			54.81	0.03	28.78	0.06			10.39	5.41	0.09			99.57		2.48	1.53	0	0	0	0	0		0.5	0.47	0.01		5			51.2	48.25	0.55		0.512
BR GIC 9A	amphibole gabbro	upper gabbro	Line 10 GIC9AF2I	849			51.61	0.07	31.29	0.11	0.01		13.1	3.9	0.09			100.18		2.34	1.67	0	0	0	0	0		0.64	0.34	0.01		5			64.62	34.82	0.55		0.646
BR GIC 9A	amphibole gabbro	upper gabbro	Line 11 GIC9AF2I	850			49.52		32.56	0.09	0.02		14.76	3	0.05	0		100		2.26	1.75	0	0	0	0	0		0.72	0.26	0		5			72.93	26.78	0.28		0.729
BR GIC 9A	amphibole gabbro	upper gabbro	Line 12 GIC9AF2I	851			49.24	0.03	32.49	0.09	0		14.58	3.08	0.08	0		99.59		2.25	1.75	0	0	0	0	0		0.72	0.27	0		5.01			71.97	27.54	0.49		0.72
BR GIC 9A	amphibole gabbro	upper gabbro	Line 13 GIC9AF2I	852			49.72		32.24	0.08	0.05	0.01	14.35	3.11	0.04			99.62		2.27	1.74	0	0	0	0	0		0.7	0.28	0		5			71.63	28.11	0.26		0.716
BR GIC 9A	amphibole gabbro	upper gabbro	Line 14 GIC9AF2I	853			54.12	0.01	29.42	0.06	0.04	0.01	11.09	5.01	0.11	0.03		99.88		2.44	1.57	0	0	0	0	0		0.54	0.44	0.01		5			54.63	44.7	0.67		0.546
BR GIC 9A	amphibole gabbro	upper gabbro	Line 15 GIC9AF2I	854			54.24		29.36	0.06			11.08	5.08	0.1			99.9		2.45	1.56	0	0	0	0	0		0.54	0.44	0.01		5			54.34	45.07	0.6		0.543
BR GIC 9A	amphibole gabbro	upper gabbro	Line 16 GIC9AF2I	855			53.58	0.01	29.72	0.11	0.03		11.31	4.88	0.08	0.01		99.72		2.43	1.59	0	0	0	0	0		0.55	0.43	0		5			55.91	43.61	0.49		0.559
BR GIC 9A	amphibole gabbro	upper gabbro	Line 17 GIC9AF2I	856			53.42	0.03	29.68	0.11		0.01	11.46	4.96	0.07	0.01		99.76		2.42	1.58	0	0	0	0	0		0.56	0.44	0		5.01			55.83	43.76	0.41		0.558
BR GIC 9A	amphibole gabbro	upper gabbro	Line 18 GIC9AF2I	857			53.41	0.04	29.93	0.07	0.04	0	11.79	4.66	0.08			100.01		2.41	1.59	0	0	0	0	0		0.57	0.41	0		5			58.03	41.49	0.48		0.58
BR GIC 9A	amphibole gabbro	upper gabbro	Line 19 GIC9AF2I	858			51.7	0.03	30.72	0.16		0	12.52	4.06	0.05	0.02		99.26		2.36	1.65	0	0.01	0	0	0		0.61	0.36	0		4.99			62.83	36.85	0.32		0.628
BR GIC 9A	amphibole gabbro	upper gabbro	Line 20 GIC9AF2I	859			52.87	0.02	30.26	0.16	0.01		12.09	4.61	0.1	0.02		100.14		2.39	1.61	0	0.01	0	0	0		0.59	0.4	0.01		5.01			58.84	40.6	0.56		0.588
																																			0	0	0		0
BR GIC 9B	amphibole gabbro	upper gabbro	Line 1 pro3	381			54.88	0.02	29.55	0.26	0.05		10.98	5.43	0.11			101.26		2.45	1.55	0	0.01	0	0	0		0.52	0.47	0.01		5.01			52.44	46.93	0.63		0.524
BR GIC 9B	amphibole gabbro	upper gabbro	Line 2 pro3	382			57.38	0.04	27.76	0.12	0.02	0.01	9.12	6.58	0.13	0.01		101.15		2.55	1.45	0	0	0	0	0		0.43	0.57	0.01		5.01			43.04	56.2	0.75		0.43
BR GIC 9B	amphibole gabbro	upper gabbro	Line 3 pro3	383			57.99	0	27.67	0.07			8.68	6.66	0.14	0.03		101.23		2.57	1.44	0	0	0	0	0		0.41	0.57	0.01		5			41.53	57.68	0.79		0.415
BR GIC 9B	amphibole gabbro	upper gabbro	Line 4 pro3	384			56.57		28.4	0.06		0	9.79	6.06	0.1	0.01		100.99		2.52	1.49	0	0	0	0	0		0.47	0.52	0.01		5			46.9	52.51	0.59		0.469
BR GIC 9B	amphibole gabbro	upper gabbro	Line 5 pro3	385			54.47	0.02	29.89	0.08			11.38	5.06	0.11			101		2.43	1.57	0	0	0	0	0		0.54	0.44	0.01		5			55.06	44.32	0.62		0.551
BR GIC 9B	amphibole gabbro	upper gabbro	Line 6 pro3	386			52.17	0.05	31.08	0.1		0	12.93	4.08	0.07			100.48		2.35	1.65	0	0	0	0	0		0.63	0.36	0		5			63.38	36.19	0.43		0.634
BR GIC 9B	amphibole gabbro	upper gabbro	Line 7 pro3	387			51.02	0.04	32.58	0.13	0.02		14.43	3.37	0.07			101.65		2.29	1.72	0	0	0	0	0		0.69	0.29	0		5			70.02	29.61	0.38		0.7
BR GIC 9B	amphibole gabbro	upper gabbro	Line 8 pro3	388			50.56	0.04	32.77	0.13		0.02	14.62	3.23	0.07			101.43		2.27	1.74	0	0	0	0	0		0.7	0.28	0		5			71.18	28.44	0.38		0.712
BR GIC 9B	amphibole gabbro	upper gabbro	Line 9 pro3	389			51.57	0.02	31.45	0.08	0.01	0.01	13.48	3.9	0.07	0.05		100.64		2.33	1.67	0	0	0	0	0		0.65	0.34	0		5.01			65.4	34.21	0.38		0.654
BR GIC 9B	amphibole gabbro	upper gabbro	Line 10 pro3	390			55.1	0.04	29.06	0.05		0.02	10.58	5.66	0.1			100.6		2.47	1.53	0	0	0	0	0		0.51	0.49	0.01		5.01			50.53	48.89	0.58		0.505
BR GIC 9B	amphibole gabbro	upper gabbro	Line 11 pro3	391			54.07	0.05	29.77	0.46	0.01	0.22	11.21	4.86	0.2	0.02		100.86		2.42	1.57	0	0.02	0	0.01	0		0.54	0.42	0.01		5			55.42	43.42	1.17		0.554
BR GIC 9B	amphibole gabbro	upper gabbro	Line 12 pro3	392			54.36	0.01	29.9	0.17	0.01	0.02	11.55	5.05	0.13			101.19		2.43	1.57	0	0.01	0	0	0		0.55	0.44	0.01		5.01			55.45	43.82	0.73		0.555
BR GIC 9B	amphibole gabbro	upper gabbro	Line 13 pro3	393			54.18	0.02	30.08	0.16	0.03	0.02	11.62	4.96	0.08	0.03		101.18		2.42	1.58	0	0.01	0	0	0		0.56	0.43	0		5			56.15	43.41	0.44		0.561
BR GIC 9B	amphibole gabbro	upper gabbro	Line 14 pro3	394			54.7	0.04	29.57	0.12	0.01	0.01	11.3	5.17	0.07			100.97		2.44	1.56	0	0	0	0	0		0.54	0.45	0		5			54.5	45.09	0.41		0.545
BR GIC 9B	amphibole gabbro	upper gabbro	Line 15 pro3	395			54.66	0.01	29.49	0.19	0.01		10.8	5.28	0.1	0.02		100.54		2.45	1.56	0	0.01	0	0	0		0.52	0.46	0.01		5			52.73	46.67	0.59		0.527
BR GIC 9B	amphibole gabbro	upper gabbro	9b6 1	396			57.29	0.03	27.83	0.05	0.01		9.31	6.39	0.13			101.03		2.54	1.46	0	0	0	0	0		0.44	0.55	0.01		5			44.27	54.99	0.74		0.443
BR GIC 9B	amphibole gabbro	upper gabbro	9b6 2	397			56.15		28.71	0.1	0.01	0.01	10	5.97	0.1	0.03		101.07		2.5	1.51	0	0	0	0	0		0.48	0.52	0.01		5.01			47.81	51.65	0.54		0.478
BR GIC 9B	amphibole gabbro	upper gabbro	Line 1 pro4	404			56.45	0.08	28.64	0.06			9.64	6.09	0.11			101.07		2.51	1.5	0	0	0	0	0		0.46	0.52	0.01		5			46.35	53.01	0.64		0.463
BR GIC 9B	amphibole gabbro	upper gabbro	Line 2 pro4	405			54.44	0.01	29.47	0.06	0.02		11.12	5.22	0.1			100.43		2.45	1.56	0	0	0	0	0		0.54	0.45	0.01		5			53.78	45.64	0.58		0.538
BR GIC 9B	amphibole gabbro	upper gabbro	Line 3 pro4	406			50.71	0.02	32.08	0.06	0.02		14.1	3.6	0.07			100.67		2.29	1.71	0	0	0	0	0		0.68	0.32	0		5.01			68.12	31.48	0.4		0.681
BR GIC 9B	amphibole gabbro	upper gabbro	Line 4 pro4	407			50.5		31.62	0.09		0.01	14.05	3.42	0.07			99.74		2.3	1.7	0	0	0	0	0		0.69	0.3	0		5			69.15	30.43	0.41		0.692
BR GIC 9B	amphibole gabbro	upper gabbro	Line 5 pro4	408			50.53	0.01	32.14	0.08		0.02	14.33	3.41	0.05			100.57		2.29	1.72	0	0	0	0	0		0.7	0.3	0		5.01			69.72	29.99	0.28		0.697
BR GIC 9B	amphibole gabbro	upper gabbro	Line 6 pro4	409			51.7		31.55	0.03	0.02		13.43	3.92	0.06			100.71		2.33	1.68	0	0	0	0	0		0.65	0.34	0		5			65.22	34.43	0.35		0.652
BR GIC 9B	amphibole gabbro	upper gabbro	Line 7 pro4	410			55.16	0.01	29.37	0.02	0.01		10.96	5.3	0.11	0.08		101.01		2.46	1.55	0	0	0	0	0		0.52	0.46	0.01		5			52.98	46.37	0.65		0.53
BR GIC 9B	amphibole gabbro	upper gabbro	Line 8 pro4	411			56.65		28.32	0.05			9.6	6.15	0.14			100.9		2.52	1.49	0	0	0	0	0		0.46	0.53	0.01		5.01			45.94	53.29	0.77		0.459
BR GIC 9B	amphibole gabbro	upper gabbro	9b5 1	412			50.49		32.31	0.08		0.01	14.12	3.47	0.06	0.01		100.55		2.29	1.72	0	0	0	0	0		0.69	0.3	0		5.01			68.98	30.68	0.34		0.69
BR GIC 9B	amphibole gabbro	upper gabbro	9b5 2	413			56.15		29	0.11		0.02	10.05	5.82	0.1			101.24		2.49	1.52	0	0	0	0	0		0.48	0.5	0.01		5			48.56	50.89	0.55		0.486
BR GIC 9B	amphibole gabbro	upper gabbro	9b5 3	414			50.9	0.02	32.14	0.08	0	0.02	13.95	3.56	0.05			100.71		2.3	1.71	0	0	0	0	0		0.68	0.31	0		5			68.23	31.48	0.29		0.682
BR GIC 9B	amphibole gabbro	upper gabbro	9b5 4	415			54.25	0.05	29.75	0.17		0.01	11.41	5.05	0.11			100.79		2.43	1.57	0	0.01	0	0	0		0.55	0.44	0.01		5			55.16	44.21	0.63		0.552
																																							0
GIC13	hornblendite	lower gabbro	F GIC13F4_1	119			59.29	0.02	24.57	0.1	0.04	0	6.34	8.32	0.08			98.92		2.68	1.31	0	0	0	0	0		0.31	0.73	0		5.03			0.44	70.06	29.5		0.004
GIC13	hornblendite	lower gabbro	F GIC13F4_2	120			56.45	0	26.14	0.08	0.03	0.03	8.43	7.17	0.07			98.49		2.58	1.41	0	0	0	0	0		0.41	0.63	0		5.04			0.39	60.38	39.23		0.004
GIC13	hornblendite	lower gabbro	F GIC13F4_3	121			56.08	0	26.05	0.02	0	0.02	8.78	6.81	0.07			97.92		2.57	1.41	0	0	0	0	0		0.43	0.61	0		5.03			0.39	58.17	41.44		0.004
GIC13	hornblendite	lower gabbro	F GIC13F4_4	122			58.88	0.11	24.33	0.18	0	0	6.77	7.92	0.07			98.29		2.68	1.3	0	0.01	0	0	0		0.33	0.7	0		5.02			0.39	67.65	31.96		0.004
GIC13	hornblendite	lower gabbro	F GIC13F4_5	123			55.63	0.03	26.66	0.06	0	0.03	9.12	6.5	0.08			98.21		2.55	1.44	0	0	0	0	0		0.45	0.58	0		5.02			0.45	56.07	43.47		0.005
GIC13	hornblendite	lower gabbro	F GIC13F4_6	124			55.41	0.19	26.78	0.13	0	0.02	9.41	6.72	0.06			98.79		2.53	1.44	0.01	0	0	0	0		0.46	0.59	0		5.04			0.33	56.19	43.48		0.003
GIC13	hornblendite	lower gabbro	F GIC13F4_7	125			59.85	0.04	23.64	0.06	0	0.03	5.62	8.34	0.08			97.71		2.72	1.27	0	0	0	0	0		0.27	0.74	0		5.01			0.46	72.53	27.01		0.005
GIC13	hornblendite	lower gabbro	F GIC13F4_8	126			60.49	0	23.04	0.04	0	0.01	5.06	8.57	0.09			97.31		2.76	1.24	0	0	0	0	0		0.25	0.76	0.01		5.01			0.52	75.01	24.47		0.005
GIC13	hornblendite	lower gabbro	F GIC13F4_9	127			58.72	0	24.28	0.06	0	0	6.73	8.02	0.09			98.08		2.68	1.3	0	0	0	0	0		0.33	0.71	0.01		5.03			0.5	67.98	31.52		0.005
GIC13	hornblendite	lower gabbro	F GIC13F5_1	128			60.48	0	24.21	0.05	0.01	0	6.36	8.22	0.08			99.63		2.71	1.28	0	0	0	0	0		0.31	0.71	0		5.01			0.45	69.74	29.82		0.004
GIC13	hornblendite	lower gabbro	F GIC13F5_2	129			60.53	0	24.2	0.06	0.02	0.01	6.18	7.79	0.11			99.04		2.72	1.28	0	0	0	0	0		0.3	0.68	0.01		4.98			0.64	69.08	30.28		0.006
GIC13	hornblendite	lower gabbro	F GIC13F5_3	130			55.48	0.01	27.45	0.02	0	0	10.04	6.07	0.07			99.31		2.52	1.47	0	0	0	0	0		0.49	0.53	0		5.02			0.39	52.04	47.57		0.004
GIC13	hornblendite	lower gabbro	F GIC13F5_4	131			55.19	0.08	27.59	0.1	0.01	0	10.2	5.75	0.07			99.16		2.51	1.48	0	0	0	0	0		0.5	0.51	0		5			0.4	50.29	49.3		0.004
GIC13	hornblendite	lower gabbro	F GIC13F5_5	132			57.95	0	25.73	0.06	0.02	0.01	8.28	6.98	0.08			99.38		2.62	1.37	0	0	0	0	0		0.4	0.61	0		5.01			0.45	60.13	39.42		0.005
GIC13	hornblendite	lower gabbro	F GIC13F6_1	133			54.29	0.02	27.41	0.11	0	0.01	10.42	5.96	0.07			98.55		2.49	1.48	0	0	0	0	0		0.51	0.53	0		5.03			0.39	50.66	48.95		0.004
GIC13	hornblendite	lower gabbro	F GIC13F6_2	134			51.31	0.63	28.17	0.52	0.03	0.01	11.25	4.83	0.07			96.99		2.41	1.56	0.02	0.02	0	0	0		0.57	0.44	0		5.02			0.42	43.54	56.04		0.004
GIC13	hornblendite	lower gabbro	F GIC13F6_3	135			52.54	0	28.68	0.06	0.02	0.02	11.52	5.19	0.05			98.25		2.43	1.56	0	0	0	0	0		0.57	0.46	0		5.03			0.28	44.78	54.93		0.003
GIC13	hornblendite	lower gabbro	F GIC13F6_4	136			51.91	0.26	26.81	1.95	0	0.98	9.79	5.01	1.05			98.07		2.43	1.48	0.01	0.08	0	0.07	0		0.49	0.46	0.06		5.08			6.22	45.09	48.69		0.062
GIC13	hornblendite	lower gabbro	F GIC13F6_5	137			54.45	0	27.01	0.11	0.04	0.03	10.13	6.16	0.05			98		2.51	1.47	0	0	0	0	0		0.5	0.55	0		5.04			0.28	52.24	47.48		0.003
GIC13	hornblendite	lower gabbro	F GIC13F6_6	138			56.19	0.01	25.63	0.16	0.01	0.02	8.36	6.95	0.05			97.45		2.59	1.39	0	0.01	0	0	0		0.41	0.62	0		5.03			0.28	59.9	39.82		0.003
																				#DIV/0!	#DIV/0!	#DIV/0!	#DIV/0!	#DIV/0!	#DIV/0!	#DIV/0!		#DIV/0!	#DIV/0!	#DIV/0!		#DIV/0!			#DIV/0!	#DIV/0!	#DIV/0!		#DIV/0!
0019	Granite	Granite	F 0019F2_1	186			66.75	0	20.84	0.04	0.02	0.02	2.17	10.84	0.1			100.79		2.91	1.07	0	0	0	0	0		0.1	0.92	0.01		5.01			0.53	89.56	9.91		0.005
0019	Granite	Granite	F 0019F2_2	187			65.53	0	21.73	0.1	0	0	3.21	10.28	0.12			100.96		2.86	1.12	0	0	0	0	0		0.15	0.87	0.01		5.02			0.63	84.75	14.62		0.006
0019	Granite	Granite	F 0019F2_3	188			65.17	0	21.87	0.09	0.01	0	3.47	10.2	0.08			100.88		2.85	1.13	0	0	0	0	0		0.16	0.87	0		5.02			0.43	83.81	15.76		0.004
0019	Granite	Granite	F 0019F2_4	189			63.88	0	22.4	0.01	0	0.02	4.13	9.84	0.1			100.37		2.82	1.16	0	0	0	0	0		0.2	0.84	0.01		5.02			0.52	80.77	18.71		0.005
0019	Granite	Granite	F 0019F2_5	190			65.13	0.02	22.26	0.02	0	0	3.81	9.83	0.12			101.19		2.84	1.14	0	0	0	0	0		0.18	0.83	0.01		5			0.68	81.8	17.51		0.007
0019	Granite	Granite	F 0019F2_6	191			65.47	0	21.78	0	0	0	3.47	9.76	0.09			100.58		2.87	1.12	0	0	0	0	0		0.16	0.83	0.01		4.99			0.51	83.17	16.32		0.005
0019	Granite	Granite	F 0019F2_7	192			64.64	0.01	22.58	0.03	0	0.04	4.3	9.49	0.09			101.17		2.82	1.16	0	0	0	0	0		0.2	0.8	0.01		5			0.51	79.57	19.91		0.005
0019	Granite	Granite	F 0019F2_8	193			65.9	0	21.84	0.02	0	0.05	3.3	10.06	0.09			101.26		2.87	1.12	0	0	0	0	0		0.15	0.85	0.01		5			0.5	84.23	15.27		0.005
0019	Granite	Granite	F 0019F2_9	194			66.52	0	20.81	0.01	0	0.03	2.21	10.68	0.07			100.33		2.91	1.07	0	0	0	0	0		0.1	0.91	0		5			0.41	89.39	10.2		0.004
0019	Granite	Granite	F 0019F3_1	195			64.91	0	21.06	0	0	0.01	2.76	9.96	0.09			98.77		2.89	1.1	0	0	0	0	0		0.13	0.86	0		4.99			0.5	86.3	13.21		0.005
0019	Granite	Granite	F 0019F3_2	196			64.99	0	21.58	0	0	0.04	3.03	10.17	0.1			99.9		2.87	1.12	0	0	0	0	0		0.14	0.87	0.01		5.01			0.54	85.41	14.06		0.005
0019	Granite	Granite	F 0019F3_3	197			63.2	0.03	22.63	0.07	0.03	0.03	4.66	9.27	0.2			100.12		2.8	1.18	0	0	0	0	0		0.22	0.8	0.01		5.01			1.1	77.41	21.49		0.011
0019	Granite	Granite	F 0019F3_4	198			63.4	0.04	22.59	0.09	0.02	0.02	4.45	9.65	0.16			100.42		2.8	1.18	0	0	0	0	0		0.21	0.83	0.01		5.03			0.86	79	20.15		0.009
0019	Granite	Granite	F 0019F3_5	199			63.09	0.04	22.72	0.16	0.04	0.03	4.74	9.41	0.19			100.43		2.79	1.18	0	0.01	0	0	0		0.22	0.81	0.01		5.03			1.05	77.38	21.56		0.011
0019	Granite	Granite	F 0019F3_6	200			64.97	0.04	21.52	0.14	0.05	0.03	3.28	10.16	0.15			100.34		2.86	1.12	0	0.01	0	0	0		0.15	0.87	0.01		5.02			0.8	84.17	15.03		0.008
																																			#DIV/0!	#DIV/0!	#DIV/0!		#DIV/0!
KPGICG12	Granophyre	Granophyre	F KPGICG12F4_1	139			69.06	0	19.68	0	0	0.01	0.77	11.7	0.06			101.29		2.98	1	0	0	0	0	0		0.04	0.98	0		5.01			0.33	96.17	3.51		0.003
KPGICG12	Granophyre	Granophyre	F KPGICG12F4_2	140			69.35	0	19.27	0	0	0.01	0.36	12.06	0.05			101.1		3	0.98	0	0	0	0	0		0.02	1.01	0		5.01			0.28	98.11	1.61		0.003
KPGICG12	Granophyre	Granophyre	F KPGICG12F4_3	141			101.93	0	0	0	0	0	0	0.1	0.01			102.05		4	0	0	0	0	0	0		0	0.01	0		4.01			3.78	95.04	1.18		0.038
KPGICG12	Granophyre	Granophyre	F KPGICG12F4_4	142			68.65	0.01	19.8	0.06	0	0.02	0.91	11.18	0.08			100.73		2.98	1.01	0	0	0	0	0		0.04	0.94	0		4.99			0.47	95.25	4.28		0.005
KPGICG12	Granophyre	Granophyre	F KPGICG12F4_5	143			102.16	0	0.02	0	0	0.02	0.01	0	0.03			102.25		4	0	0	0	0	0	0		0	0	0		4			73.35	0	26.65		0.734
KPGICG12	Granophyre	Granophyre	F KPGICG12F4_6	144			69.24	0.01	19.76	0.05	0.01	0.02	0.83	11.04	0.08			101.04		2.99	1.01	0	0	0	0	0		0.04	0.92	0		4.97			0.45	95.57	3.98		0.004
KPGICG12	Granophyre	Granophyre	F KPGICG12F2_1	145			67.37	0.02	19.69	0.02	0	0.01	0.94	11.41	0.08			99.54		2.97	1.02	0	0	0	0	0		0.04	0.97	0		5.01			0.46	95.21	4.33		0.005
KPGICG12	Granophyre	Granophyre	F KPGICG12F2_2	146			68.19	0.01	19.53	0.01	0.01	0	0.67	11.77	0.07			100.25		2.98	1.01	0	0	0	0	0		0.03	1	0		5.02			0.36	96.62	3.03		0.004
KPGICG12	Granophyre	Granophyre	F KPGICG12F2_3	147			66.88	0.05	19.68	0.13	0.05	0.03	0.99	11.58	0.08			99.48		2.95	1.02	0	0	0	0	0		0.05	0.99	0		5.03			0.44	95.05	4.51		0.004
KPGICG12	Granophyre	Granophyre	F KPGICG12F2_4	148			66.4	0	19.89	0.02	0.01	0.01	1.19	11.4	0.08			99		2.94	1.04	0	0	0	0	0		0.06	0.98	0		5.03			0.43	94.15	5.43		0.004
																																			#DIV/0!	#DIV/0!	#DIV/0!		#DIV/0!
G14-3.1	Granophyre	Granophyre	F G143.1F1_1	1			71.26	0	18.39	0	0	0	0.45	10.06	0.08			100.24		3.08	0.94	0	0	0	0	0		0.02	0.84	0		4.88			0.48	97.14	2.38		0.005
G14-3.1	Granophyre	Granophyre	F G143.1F1_2	2			69.32	0.04	19.62	0.02	0.01	0	0.36	10.91	0.09			100.41		3.01	1	0	0	0	0	0		0.02	0.92	0		4.95			0.52	97.68	1.8		0.005
G14-3.1	Granophyre	Granophyre	F G143.1F1_3	3			69.46	0.02	19.65	0	0.01	0	0.39	10.41	0.09			100.09		3.02	1.01	0	0	0	0	0		0.02	0.88	0.01		4.92			0.57	97.43	2		0.006
G14-3.1	Granophyre	Granophyre	F G143.1F1_4	4			68.87	0.04	19.65	0	0.01	0.01	0.46	10.88	0.09			100.01		3	1.01	0	0	0	0	0		0.02	0.92	0.01		4.96			0.54	97.19	2.28		0.005
G14-3.1	Granophyre	Granophyre	F G143.1F1_5	5			68.89	0.03	19.87	0.01	0	0	0.62	10.71	0.07			100.24		2.99	1.02	0	0	0	0	0		0.03	0.9	0		4.95			0.42	96.5	3.07		0.004
G14-3.1	Granophyre	Granophyre	F G143.1F1_6	6			67.49	0	19.27	0	0.01	0	0.49	10.58	0.09			97.95		3	1.01	0	0	0	0	0		0.02	0.91	0		4.95			0.53	96.99	2.48		0.005
G14-3.1	Granophyre	Granophyre	F G143.1F1_7	7			69.61	0	20.07	0.01	0.02	0	0.6	10.71	0.07			101.28		3	1.02	0	0	0	0	0		0.03	0.89	0		4.94			0.39	96.63	2.99		0.004
G14-3.1	Granophyre	Granophyre	F G143.1F3_1	8			68.68	0	19.94	0	0	0.01	0.77	10.78	0.13			100.39		2.99	1.02	0	0	0	0	0		0.04	0.91	0.01		4.96			0.78	95.44	3.78		0.008
G14-3.1	Granophyre	Granophyre	F G143.1F3_2	9			68.43	0	20.33	0	0.02	0.01	1.19	10.68	0.07			100.78		2.97	1.04	0	0	0	0	0		0.06	0.9	0		4.96			0.42	93.82	5.76		0.004
G14-3.1	Granophyre	Granophyre	F G143.1F3_3	10			67.66	0	20.2	0	0.03	0	1.32	10.64	0.07			99.99		2.96	1.04	0	0	0	0	0		0.06	0.9	0		4.97			0.38	93.24	6.38		0.004
G14-3.1	Granophyre	Granophyre	F G143.1F3_4	11			67.79	0	19.8	0.02	0	0	0.97	10.77	0.08			99.52		2.98	1.03	0	0	0	0	0		0.05	0.92	0		4.97			0.47	94.79	4.74		0.005
G14-3.1	Granophyre	Granophyre	F G143.1F3_5	12			67.31	0	20.12	0.04	0.02	0	1.17	10.3	0.08			99.23		2.97	1.04	0	0	0	0	0		0.06	0.88	0		4.95			0.46	93.64	5.9		0.005
G14-3.1	Granophyre	Granophyre	F G143.1F3_6	13			67.41	0.05	19.71	0.02	0	0	0.9	10.06	0.11			98.32		2.99	1.03	0	0	0	0	0		0.04	0.86	0.01		4.93			0.71	94.61	4.68		0.007
																																			#DIV/0!	#DIV/0!	#DIV/0!		#DIV/0!
GIC3	pyroxene gabbro	Meladiorite	F GIC3F1_1	247			58.24	0.02	25.92	0.09	0.01	0.03	7.73	6.82	0.36			1.48772e+07		2.62	1.38	0	0	0	0	0		0.37	0.6	0.02		5			2.08	60.24	37.68		0.021
GIC3	pyroxene gabbro	Meladiorite	F GIC3F1_2	248			59.75	0.02	24.78	0.06	0.03	0.04	6.59	7.52	0.42			1.48751e+07		2.68	1.31	0	0	0	0	0		0.32	0.65	0.02		5			2.4	65.76	31.85		0.024
GIC3	pyroxene gabbro	Meladiorite	F GIC3F1_3	249			53.14	0.01	29.03	0.1	0.05	0.03	11.69	4.61	0.19			1.48234e+07		2.43	1.57	0	0	0	0	0		0.57	0.41	0.01		5			1.1	41.2	57.7		0.011
GIC3	pyroxene gabbro	Meladiorite	F GIC3F1_4	250			54.5	0.03	27.98	0.1	0.05	0.05	10.37	5.49	0.26			1.48193e+07		2.49	1.5	0	0	0	0	0		0.51	0.49	0.01		5.01			1.49	48.22	50.29		0.015
GIC3	pyroxene gabbro	Meladiorite	F GIC3F1_5	251			56.54	0.01	26.35	0.12	0.01	0.03	8.52	6.6	0.23			1.47562e+07		2.58	1.42	0	0	0	0	0		0.42	0.58	0.01		5.01			1.31	57.61	41.08		0.013
GIC3	pyroxene gabbro	Meladiorite	F GIC3F1_6	252			59.34	0.01	24.65	0.15	0	0.02	6.43	7.73	0.35			1.4797e+07		2.68	1.31	0	0.01	0	0	0		0.31	0.68	0.02		5.01			2.01	67.11	30.89		0.02
GIC3	pyroxene gabbro	Meladiorite	F GIC3F2_1	253			59.44	0.02	24.42	0.13	0.01	0.01	6.3	7.93	0.33			1.47838e+07		2.69	1.3	0	0.01	0	0	0		0.31	0.7	0.02		5.02			1.89	68.18	29.93		0.019
GIC3	pyroxene gabbro	Meladiorite	F GIC3F2_2	254			58.92	0.01	24.71	0.06	0.01	0	6.85	7.36	0.31			1.47284e+07		2.67	1.32	0	0	0	0	0		0.33	0.65	0.02		5			1.77	64.84	33.39		0.018
GIC3	pyroxene gabbro	Meladiorite	F GIC3F2_3	255			59	0	24.68	0.09	0	0.01	6.67	7.56	0.31			1.47397e+07		2.68	1.32	0	0	0	0	0		0.32	0.66	0.02		5.01			1.76	66.04	32.2		0.018
GIC3	pyroxene gabbro	Meladiorite	F GIC3F2_4	256			57.56	0.02	25.8	0.02	0.03	0.01	7.8	6.57	0.21			1.4698e+07		2.62	1.38	0	0	0	0	0		0.38	0.58	0.01		4.98			1.23	59.63	39.14		0.012
GIC3	pyroxene gabbro	Meladiorite	F GIC3F2_5	257			59.38	0.06	24.92	0.25	0.02	0.01	6.63	7.7	0.3			1.48875e+07		2.67	1.32	0	0.01	0	0	0		0.32	0.67	0.02		5.01			1.72	66.59	31.69		0.017
																																			#DIV/0!	#DIV/0!	#DIV/0!		#DIV/0!
GIC7A		Mingled zone (felsic part)	F GIC7AF3_1	258			58.62	0	22.17	0.11	0.02	0	4.42	8.54	0.33			94.39		2.76	1.23	0	0	0	0	0		0.22	0.78	0.02		5.02			1.92	76.26	21.81		0.019
GIC7A		Mingled zone (felsic part)	F GIC7AF3_2	259			57.23	0	20.43	0.15	0	0	3.25	8.27	1.06			90.5		2.81	1.18	0	0.01	0	0	0		0.17	0.79	0.07		5.02			6.47	76.84	16.7		0.065
GIC7A		Mingled zone (felsic part)	F GIC7AF3_3	260			60.34	0	21.86	0.01	0	0.04	3.95	8.82	0.16			95.3		2.8	1.2	0	0	0	0	0		0.2	0.79	0.01		5			0.97	79.39	19.63		0.01
GIC7A		Mingled zone (felsic part)	F GIC7AF3_4	261			62	0	21.63	0.02	0	0.04	3.55	8.76	0.13			96.16		2.84	1.17	0	0	0	0	0		0.17	0.78	0.01		4.97			0.78	81.09	18.14		0.008
GIC7A		Mingled zone (felsic part)	F GIC7AF3_5	262			58.2	0.02	20.45	0.01	0	0	2.92	8.66	0.09			90.46		2.84	1.17	0	0	0	0	0		0.15	0.82	0.01		4.99			0.54	83.83	15.62		0.005
GIC7A		Mingled zone (felsic part)	F GIC7AF2_1	263			63.32	0.03	21.54	0.07	0	0.04	3.15	9.42	0.13			97.7		2.85	1.14	0	0	0	0	0		0.15	0.82	0.01		4.99			0.74	83.79	15.47		0.007
GIC7A		Mingled zone (felsic part)	F GIC7AF2_2	264			61.5	0.02	22.66	0.14	0	0.03	4.7	8.15	0.29			97.57		2.79	1.21	0	0.01	0	0	0		0.23	0.72	0.02		4.97			1.72	74.54	23.74		0.017
GIC7A		Mingled zone (felsic part)	F GIC7AF2_3	265			61.01	0.04	23.17	0.18	0	0.03	5.27	7.97	0.49			98.37		2.76	1.24	0	0.01	0	0	0		0.26	0.7	0.03		4.99			2.85	71.13	26.01		0.029
GIC7A		Mingled zone (felsic part)	F GIC7AF2_4	266			60.18	0.01	22.94	0.23	0	0	5.37	7.61	0.18			96.75		2.76	1.24	0	0.01	0	0	0		0.26	0.68	0.01		4.96			1.13	71.11	27.76		0.011
GIC7A		Mingled zone (felsic part)	F GIC7AF2_5	267			62.22	0.03	22.45	0.17	0	0	4.37	8.37	0.15			97.98		2.81	1.19	0	0.01	0	0	0		0.21	0.73	0.01		4.96			0.92	76.89	22.19		0.009
GIC7A		Mingled zone (felsic part)	F GIC7AF2_6	268			63.58	0.02	21.75	0.11	0	0.01	3.42	8.9	0.16			98.08		2.86	1.15	0	0	0	0	0		0.16	0.77	0.01		4.96			0.94	81.7	17.36		0.009
GIC7A		Mingled zone (felsic part)	F GIC7AF5_1	269			61.38	0.02	22.16	0.12	0	0.02	4.01	8.98	0.2			97.03		2.8	1.19	0	0	0	0	0		0.2	0.79	0.01		5			1.15	79.29	19.55		0.012
GIC7A		Mingled zone (felsic part)	F GIC7AF5_2	270			61.41	0.06	22.21	0.01	0.06	0	4.03	8.83	0.1			96.87		2.8	1.2	0	0	0	0	0		0.2	0.78	0.01		4.99			0.62	79.38	20		0.006
GIC7A		Mingled zone (felsic part)	F GIC7AF5_3	271			62.22	0.02	21.27	0.04	0.01	0	3.04	9.34	0.11			96.24		2.85	1.15	0	0	0	0	0		0.15	0.83	0.01		4.99			0.66	84.18	15.16		0.007
																																			#DIV/0!	#DIV/0!	#DIV/0!		#DIV/0!
GIC7B		Mingled zone (mafic part)	F GIC7BF4_1	246			59.81	0	24.19	0.04	0.01	0.04	6.08	7.68	0.06			97.9		2.71	1.29	0	0	0	0	0		0.3	0.68	0		4.98			0.34	69.34	30.32		0.003
GIC7B		Mingled zone (mafic part)	F GIC7BF4_2	247			50.63	0.1	29.84	0.56	0.03	0.06	13.01	3.73	0.1			98.06		2.35	1.63	0	0.02	0	0	0		0.65	0.34	0.01		5			0.62	33.93	65.45		0.006
GIC7B		Mingled zone (mafic part)	F GIC7BF4_3	248			52.34	0.1	28.74	0.5	0.02	0.04	11.69	4.7	0.12			98.35		2.42	1.56	0	0.02	0	0	0		0.58	0.42	0.01		5.01			0.68	41.84	57.49		0.007
GIC7B		Mingled zone (mafic part)	F GIC7BF4_4	249			53.52	0.06	28.16	0.44	0.03	0.04	10.74	4.95	0.14			98.3		2.46	1.53	0	0.02	0	0	0		0.53	0.44	0.01		5			0.84	45.11	54.05		0.008
GIC7B		Mingled zone (mafic part)	F GIC7BF4_6	251			62.81	0	21.86	0.24	0	0.02	3.61	9.04	0.14			97.79		2.84	1.16	0	0.01	0	0	0		0.17	0.79	0.01		4.98			0.8	81.27	17.93		0.008
GIC7B		Mingled zone (mafic part)	F GIC7BF5_1	252			55.86	0.03	26.97	0.32	0.03	0.05	9.88	5.66	0.1			98.95		2.54	1.45	0	0.01	0	0	0		0.48	0.5	0.01		4.99			0.59	50.6	48.8		0.006
GIC7B		Mingled zone (mafic part)	F GIC7BF5_2	253			62.51	0	22.24	0.16	0	0.02	4.04	8.64	0.15			97.96		2.82	1.18	0	0.01	0	0	0		0.2	0.76	0.01		4.97			0.88	78.78	20.34		0.009
GIC7B		Mingled zone (mafic part)	F GIC7BF5_5	256			53.82	0.07	27.9	0.4	0.02	0.07	10.88	5.2	0.16			98.81		2.47	1.51	0	0.02	0	0.01	0		0.54	0.46	0.01		5.01			0.92	45.92	53.16		0.009
GIC7B		Mingled zone (mafic part)	F GIC7BF5_6	257			63.01	0	22.19	0.21	0.01	0	3.83	9.08	0.13			98.71		2.83	1.17	0	0.01	0	0	0		0.18	0.79	0.01		4.99			0.74	80.48	18.78		0.007
																																			#DIV/0!	#DIV/0!	#DIV/0!		#DIV/0!
GIC7C		Mingled zone (felsic part)	F GIC7CF3_1	211			64.6	0.01	20.26	0.06	0	0.01	2.15	10.03	0.15			97.33		2.92	1.08	0	0	0	0	0		0.1	0.88	0.01		4.99			0.84	88.66	10.5		0.008
GIC7C		Mingled zone (felsic part)	F GIC7CF3_2	212			65.35	0	20.59	0.02	0.01	0	2.1	10	0.1			98.21		2.92	1.08	0	0	0	0	0		0.1	0.87	0.01		4.98			0.57	89.07	10.36		0.006
GIC7C		Mingled zone (felsic part)	F GIC7CF3_3	213			64.04	0.02	21.3	0	0	0	2.68	9.66	0.07			97.78		2.88	1.13	0	0	0	0	0		0.13	0.84	0		4.98			0.4	86.37	13.23		0.004
GIC7C		Mingled zone (felsic part)	F GIC7CF3_4	214			63.94	0	20.91	0	0	0	2.39	9.58	0.09			97		2.89	1.12	0	0	0	0	0		0.12	0.84	0.01		4.97			0.54	87.42	12.03		0.005
GIC7C		Mingled zone (felsic part)	F GIC7CF4_1	208			66.14	0	20.82	0.1	0.02	0.02	1.97	10.19	0.09			99.35		2.92	1.08	0	0	0	0	0		0.09	0.87	0		4.98			0.5	89.89	9.61		0.005
GIC7C		Mingled zone (felsic part)	F GIC7CF4_2	209			63.22	0.02	22.61	0.19	0.03	0.04	4.24	8.82	0.3			99.48		2.81	1.18	0	0.01	0	0	0		0.2	0.76	0.02		4.99			1.76	77.62	20.62		0.018
GIC7C		Mingled zone (felsic part)	F GIC7CF4_3	210			63.37	0	22.66	0.1	0.05	0.01	3.92	9.38	0.09			99.58		2.81	1.19	0	0	0	0	0		0.19	0.81	0.01		5			0.53	80.81	18.66		0.005
GIC7C		Mingled zone (felsic part)	F GIC7CF4_4	211			62.65	0.05	22.77	0.24	0.03	0	4.41	8.75	0.15			99.05		2.8	1.2	0	0.01	0	0	0		0.21	0.76	0.01		4.98			0.89	77.52	21.59		0.009
GIC7C		Mingled zone (felsic part)	F GIC7CF4_5	212			65.01	0	21.17	0.28	0.02	0	2.48	9.78	0.11			98.85		2.89	1.11	0	0.01	0	0	0		0.12	0.84	0.01		4.98			0.62	87.18	12.2		0.006
GIC7C		Mingled zone (felsic part)	F GIC7CF4_6	213			63.34	0.02	22.03	0.05	0.01	0.02	3.73	9.11	0.09			98.4		2.84	1.16	0	0	0	0	0		0.18	0.79	0.01		4.98			0.53	81.14	18.33		0.005
GIC7C		Mingled zone (felsic part)	F GIC7CF4_7	214			61.48	0.05	23.64	0.2	0.02	0.03	5.8	7.94	0.27			99.43		2.75	1.24	0	0.01	0	0	0		0.28	0.69	0.02		4.98			1.55	70.13	28.32		0.015
GIC7C		Mingled zone (felsic part)	F GIC7CF4_8	215			57.97	0.03	24.82	1.23	0	0.08	4.93	6.9	0.54			96.5		2.68	1.35	0	0.05	0	0.01	0		0.24	0.62	0.03		4.97			3.57	69.15	27.28		0.036
GIC7C		Mingled zone (felsic part)	F GIC7CF4_9	216			61.53	0	23.07	0.2	0	0.01	4.74	8.37	0.2			98.12		2.78	1.23	0	0.01	0	0	0		0.23	0.73	0.01		4.98			1.16	75.29	23.55		0.012
GIC7C		Mingled zone (felsic part)	F GIC7CF4_10	217			64.04	0	21.58	0.08	0	0	3.06	9.59	0.11			98.47		2.86	1.14	0	0	0	0	0		0.15	0.83	0.01		4.99			0.65	84.45	14.9		0.006
																				#DIV/0!	#DIV/0!	#DIV/0!	#DIV/0!	#DIV/0!	#DIV/0!	#DIV/0!		#DIV/0!	#DIV/0!	#DIV/0!		#DIV/0!			#DIV/0!	#DIV/0!	#DIV/0!		#DIV/0!
H11	diorite	Meladiorite	F H11F2_1	176			57.94	0	24.08	0.16	0	0	6.08	7.78	0.17			96.21		2.68	1.31	0	0.01	0	0	0		0.3	0.7	0.01		5.01			30.17	69.89	1.01		0.302
H11	diorite	Meladiorite	F H11F2_2	177			57.67	0	23.76	0.12	0	0	5.96	7.33	0.21			95.05		2.7	1.31	0	0	0	0	0		0.3	0.66	0.01		4.99			29.85	66.49	1.27		0.299
H11	diorite	Meladiorite	F H11F2_3	178			58.29	0	23.71	0.11	0	0	5.72	7.51	0.19			95.53		2.71	1.3	0	0	0	0	0		0.28	0.68	0.01		4.99			28.49	67.7	1.12		0.285
H11	diorite	Meladiorite	F H11F2_4	179			58.5	0	24.46	0.12	0.01	0.01	6.09	7.59	0.19			96.97		2.68	1.32	0	0	0	0	0		0.3	0.67	0.01		5			29.96	67.49	1.1		0.3
H11	diorite	Meladiorite	F H11F2_5	180			60.71	0	23.5	0.13	0.03	0.01	5.08	8.27	0.21			97.96		2.75	1.25	0	0.01	0	0	0		0.25	0.73	0.01		4.99			24.66	72.62	1.23		0.247
H11	diorite	Meladiorite	F H11F3_1	181			58.52	0.03	23.76	0.1	0.04	0	5.24	8.45	0.14			96.29		2.7	1.29	0	0	0	0	0		0.26	0.76	0.01		5.03			25.95	75.73	0.85		0.259
H11	diorite	Meladiorite	F H11F3_2	182			63.44	0.05	24.8	0.05	0.02	0	6.54	7.34	0.14			102.38		2.74	1.26	0	0	0	0	0		0.3	0.62	0.01		4.94			30.29	61.55	0.79		0.303
H11	diorite	Meladiorite	F H11F3_3	183			62.83	0.05	24.72	0.11	0.05	0.01	6.47	7.31	0.16			101.72		2.74	1.27	0	0	0	0	0		0.3	0.62	0.01		4.94			30.2	61.75	0.87		0.302
H11	diorite	Meladiorite	F H11F3_4	184			63.52	0.02	24.32	0.03	0.05	0	5.8	7.83	0.13			101.7		2.76	1.25	0	0	0	0	0		0.27	0.66	0.01		4.95			27.01	65.99	0.71		0.27
H11	diorite	Meladiorite	F H11F3_5	185			62.67	0.05	24.54	0.12	0.03	0	6.58	7.52	0.16			101.67		2.73	1.26	0	0	0	0	0		0.31	0.64	0.01		4.96			30.74	63.57	0.87		0.307
H11	diorite	Meladiorite	F H11F1_1	186			59.78	0.04	24.47	0.18	0.04	0	5.56	8.5	0.14			98.71		2.7	1.3	0	0.01	0	0	0		0.27	0.74	0.01		5.03			26.88	74.32	0.81		0.269
H11	diorite	Meladiorite	F H11F1_2	187			59.59	0.05	23.98	0.1	0.05	0	5.29	8.13	0.51			97.69		2.71	1.29	0	0	0	0	0		0.26	0.72	0.03		5.01			25.8	71.8	2.96		0.258
H11	diorite	Meladiorite	F H11F1_3	188			57.4	0.08	24.98	0.12	0.03	0	6.57	7.53	0.15			96.86		2.64	1.36	0	0	0	0	0		0.32	0.67	0.01		5.02			32.43	67.3	0.89		0.324
H11	diorite	Meladiorite	F H11F1_4	189			58.61	0.01	24.43	0.25	0	0.01	5.87	8.14	0.18			97.5		2.68	1.32	0	0.01	0	0	0		0.29	0.72	0.01		5.03			28.77	72.15	1.05		0.288
H11	diorite	Meladiorite	F H11F1_5	190			59.52	0.04	24.41	0.16	0	0.03	5.65	8.3	0.16			98.26		2.7	1.3	0	0.01	0	0	0		0.27	0.73	0.01		5.02			27.4	72.9	0.92		0.274
H11	diorite	Meladiorite	F H11F1_6	191			59.1	0.04	24.04	0.14	0	0	5.5	8.44	0.15			97.41		2.7	1.3	0	0.01	0	0	0		0.27	0.75	0.01		5.03			26.91	74.75	0.89		0.269
H11	diorite	Meladiorite	F H11F1_7	192			58.91	0.02	23.83	0.16	0	0.03	5.42	8.46	0.15			96.97		2.7	1.29	0	0.01	0	0	0		0.27	0.75	0.01		5.03			26.67	75.29	0.88		0.267
																				#DIV/0!	#DIV/0!	#DIV/0!	#DIV/0!	#DIV/0!	#DIV/0!	#DIV/0!		#DIV/0!	#DIV/0!	#DIV/0!		#DIV/0!			#DIV/0!	#DIV/0!	#DIV/0!		#DIV/0!
07-4		Mingled zone (felsic part)	F_07-4F3_3	79			66.1	0	21.79	0.21	0.06	0	2.62	10.09	0.18			101.06		2.88	1.12	0	0.01	0	0	0		0.12	0.85	0.01		4.99			12.24	85.25	0.98		0.122
07-4		Mingled zone (felsic part)	F_07-4F3_4	80			63.74	0	23.22	0.14	0.03	0	4.18	8.96	0.14			100.42		2.8	1.2	0	0.01	0	0	0		0.2	0.76	0.01		4.98			19.72	76.35	0.77		0.197
07-4		Mingled zone (felsic part)	F_07-4F3_5	81			61.51	0.03	24.81	0.07	0.01	0	6	7.91	0.13			100.47		2.72	1.29	0	0	0	0	0		0.28	0.68	0.01		4.98			28.38	67.72	0.75		0.284
07-4		Mingled zone (felsic part)	F_07-4F3_6	82			63.89	0.01	22.7	0.2	0.01	0	3.62	9.22	0.15			99.8		2.82	1.18	0	0.01	0	0	0		0.17	0.79	0.01		4.98			17.13	79.02	0.87		0.171
07-4		Mingled zone (felsic part)	F_07-4F3_7	83			60	0.02	25.96	0.09	0.01	0	7.18	7.51	0.17			100.94		2.65	1.35	0	0	0	0	0		0.34	0.64	0.01		5			33.99	64.31	0.94		0.34
07-4		Mingled zone (felsic part)	F_07-4F3_8	84			60.86	0.01	25.23	0.12	0	0	6.25	8.08	0.36			100.92		2.69	1.31	0	0	0	0	0		0.3	0.69	0.02		5.01			29.58	69.2	2.01		0.296
07-4		Mingled zone (felsic part)	F_07-4F3_9	85			63.7	0.02	21.96	0.06	0	0	2.74	10.05	0.14			98.67		2.85	1.16	0	0	0	0	0		0.13	0.87	0.01		5.01			13.13	87.05	0.8		0.131
07-4		Mingled zone (felsic part)	F_07-4F1_1	86			65.69	0.01	19.97	0.01	0.02	0.02	0.96	11.09	0.28			98.04		2.94	1.05	0	0	0	0	0		0.05	0.96	0.02		5.02			4.59	96.29	1.62		0.046
07-4		Mingled zone (felsic part)	F_07-4F1_2	87			63.71	0	21.64	0.06	0	0.03	2.71	10.44	0.14			98.73		2.85	1.14	0	0	0	0	0		0.13	0.91	0.01		5.04			12.98	90.55	0.82		0.13
07-4		Mingled zone (felsic part)	F_07-4F1_3	88			63.36	0	21.95	0.08	0.02	0	2.97	10.07	0.13			98.6		2.84	1.16	0	0	0	0	0		0.14	0.87	0.01		5.02			14.26	87.4	0.76		0.143
07-4		Mingled zone (felsic part)	F_07-4F1_4	89			62.58	0	22.18	0.11	0.02	0.02	3.44	9.68	0.26			98.29		2.82	1.18	0	0	0	0	0		0.17	0.84	0.01		5.02			16.58	84.46	1.47		0.166
07-4		Mingled zone (felsic part)	F_07-4F1_5	90			62.69	0.01	22.74	0.07	0.01	0.02	3.63	9.72	0.17			99.06		2.8	1.2	0	0	0	0	0		0.17	0.84	0.01		5.03			17.39	84.17	0.95		0.174
07-4		Mingled zone (felsic part)	F_07-4F1_6	91			62.07	0.04	22.45	0.15	0.02	0	3.9	9.47	0.23			98.34		2.8	1.19	0	0.01	0	0	0		0.19	0.83	0.01		5.03			18.85	82.73	1.32		0.189
07-4		Mingled zone (felsic part)	F_07-4F1_7	92			64.52	0.04	21.53	0.1	0.04	0.02	2.58	10.5	0.12			99.45		2.86	1.13	0	0	0	0	0		0.12	0.9	0.01		5.03			12.28	90.3	0.69		0.123
07-4		Mingled zone (felsic part)	F_07-4F1_8	93			63.48	0.03	21.83	0.15	0.03	0.01	2.98	9.57	0.23			98.31		2.85	1.15	0	0.01	0	0	0		0.14	0.83	0.01		5			14.34	83.24	1.34		0.143
07-4		Mingled zone (felsic part)	F_07-4F2_1	94			64.66	0.03	18.46	0.08	0.04	0.01	0.03	0.62	16.02			99.96		2.99	1.01	0	0	0	0	0		0	0.06	0.95		5.01			0.17	5.52	94.52		0.002
07-4		Mingled zone (felsic part)	F_07-4F2_2	95			64.33	0.03	18.25	0.11	0.02	0	0.02	0.61	15.85			99.24		3	1	0	0	0	0	0		0	0.06	0.94		5			0.1	5.54	94.11		0.001
07-4		Mingled zone (felsic part)	F_07-4F2_3	96			64.06	0	18.2	0.03	0.02	0	0	0.5	15.85			98.66		3	1	0	0	0	0	0		0	0.05	0.95		5			0	4.51	94.62		0
07-4		Mingled zone (felsic part)	F_07-4F2_4	97			64.3	0	18.41	0.1	0	0	0	0.53	15.98			99.31		2.99	1.01	0	0	0	0	0		0	0.05	0.95		5			0	4.82	94.82		0
07-4		Mingled zone (felsic part)	F_07-4F2_5	98			63.62	0	18.4	0.05	0.02	0	0	0.49	15.97			98.54		2.99	1.02	0	0	0	0	0		0	0.04	0.96		5.01			0	4.49	95.58		0
07-4		Mingled zone (felsic part)	F_07-4F2_6	99			64.16	0	18.34	0.05	0.02	0	0	0.54	15.98			99.1		2.99	1.01	0	0	0	0	0		0	0.05	0.95		5			0	4.93	95.06		0
07-4		Mingled zone (felsic part)	F_07-4F2_7	100			64.39	0	18.19	0.05	0.04	0	0	0.49	15.84			99		3	1	0	0	0	0	0		0	0.04	0.94		4.99			0	4.42	94.19		0
																				#DIV/0!	#DIV/0!	#DIV/0!	#DIV/0!	#DIV/0!	#DIV/0!	#DIV/0!		#DIV/0!	#DIV/0!	#DIV/0!		#DIV/0!			#DIV/0!	#DIV/0!	#DIV/0!		#DIV/0!
AGF1-2		Mingled zone (felsic part)	F AGF1-2F2_1	25			66.34	0.01	21	0.12	0.01	0	2.64	10.5	0.08			100.7		2.9	1.08	0	0	0	0	0		0.12	0.89	0		5.01			12.37	88.97	0.45		0.124
AGF1-2		Mingled zone (felsic part)	F AGF1-2F2_2	26			63.4	0	22.56	0.14	0.01	0	4.04	9.53	0.25			99.94		2.81	1.18	0	0.01	0	0	0		0.19	0.82	0.01		5.02			19.2	81.85	1.41		0.192
AGF1-2		Mingled zone (felsic part)	F AGF1-2F2_3	27			60.51	0.01	24.54	0.21	0	0	6.41	8.2	0.34			100.22		2.69	1.29	0	0.01	0	0	0		0.31	0.71	0.02		5.02			30.57	70.81	1.91		0.306
AGF1-2		Mingled zone (felsic part)	F AGF1-2F2_4	28			59.41	0.03	24.96	0.19	0.02	0.02	7.21	7.5	0.24			99.59		2.66	1.32	0	0.01	0	0	0		0.35	0.65	0.01		5.01			34.65	65.2	1.39		0.347
AGF1-2		Mingled zone (felsic part)	F AGF1-2F2_5	29			59.16	0	24.99	0.3	0.03	0.01	7.5	7.32	0.33			99.64		2.66	1.32	0	0.01	0	0	0		0.36	0.64	0.02		5.01			36.08	63.77	1.9		0.361
AGF1-2		Mingled zone (felsic part)	F AGF1-2F2_6	30			59.51	0.03	25.3	0.22	0	0.01	7.42	7.37	0.21			100.08		2.66	1.33	0	0.01	0	0	0		0.35	0.64	0.01		5			35.49	63.78	1.19		0.355
AGF1-2		Mingled zone (felsic part)	F AGF1-2F2_7	31			59.4	0.01	25.37	0.25	0.02	0.01	7.34	7.21	0.21			99.81		2.66	1.34	0	0.01	0	0	0		0.35	0.63	0.01		4.99			35.18	62.5	1.18		0.352
AGF1-2		Mingled zone (felsic part)	F AGF1-2F2_8	32			60.95	0.03	24.51	0.12	0.01	0	6.49	8.23	0.27			100.63		2.7	1.28	0	0	0	0	0		0.31	0.71	0.02		5.02			30.83	70.69	1.53		0.308
AGF1-2		Mingled zone (felsic part)	F AGF1-2F2_9	33			60.66	0.02	24.21	0.21	0	0	6.52	8	0.17			99.79		2.71	1.27	0	0.01	0	0	0		0.31	0.69	0.01		5.01			31.21	69.28	0.95		0.312
AGF1-2		Mingled zone (mafic part)	F AGF1-2F1_1	34			62.95	0.03	22.11	0.14	0.01	0.01	3.88	9.32	0.48			98.94		2.82	1.17	0	0.01	0	0	0		0.19	0.81	0.03		5.02			18.63	80.92	2.76		0.186
AGF1-2		Mingled zone (mafic part)	F AGF1-2F1_2	35			60.06	0	24.13	0.13	0.01	0	6.08	8.39	0.3			99.1		2.7	1.28	0	0.01	0	0	0		0.29	0.73	0.02		5.03			29.31	73.22	1.72		0.293
AGF1-2		Mingled zone (mafic part)	F AGF1-2F1_3	36			57.31	0.02	25.03	0.18	0.04	0	7.78	7.1	0.26			97.71		2.63	1.35	0	0.01	0	0	0		0.38	0.63	0.02		5.02			38.23	63.14	1.53		0.382
AGF1-2		Mingled zone (mafic part)	F AGF1-2F1_4	37			57.45	0	26.08	0.1	0.02	0.02	8.39	7.12	0.23			99.41		2.59	1.39	0	0	0	0	0		0.41	0.62	0.01		5.03			40.6	62.3	1.31		0.406
AGF1-2		Mingled zone (mafic part)	F AGF1-2F1_5	38			59.11	0	24.73	0.19	0	0.02	6.76	8.1	0.08			98.98		2.67	1.32	0	0.01	0	0	0		0.33	0.71	0		5.03			32.67	70.86	0.48		0.327
AGF1-2		Mingled zone (mafic part)	F AGF1-2F1_6	39			57.08	0	25.83	0.13	0	0.02	8.34	6.83	0.14			98.37		2.6	1.39	0	0.01	0	0	0		0.41	0.6	0.01		5.01			40.7	60.29	0.81		0.407
AGF1-2		Mingled zone (mafic part)	F AGF1-2F1_7	40			58.78	0	24.3	0.19	0	0.02	6.56	7.6	0.37			97.83		2.68	1.31	0	0.01	0	0	0		0.32	0.67	0.02		5.01			32.08	67.26	2.15		0.321
AGF1-2		Mingled zone (mafic part)	F AGF1-2F1_8	41			62.84	0	21.31	0.16	0	0	3.35	10.51	0.32			98.5		2.83	1.13	0	0.01	0	0	0		0.16	0.92	0.02		5.07			16.2	91.85	1.86		0.162
AGF1-2		Mingled zone (mafic part)	F AGF1-2F3_1	42			61.27	0	23.59	0.24	0	0.01	5.45	8.6	0.09			99.25		2.74	1.24	0	0.01	0	0	0		0.26	0.75	0.01		5.01			26.14	74.61	0.52		0.261
AGF1-2		Mingled zone (mafic part)	F AGF1-2F3_2	43			49.85	0.04	31.18	0.27	0.05	0.11	14.52	3.14	0.14			99.3		2.29	1.69	0	0.01	0	0.01	0		0.72	0.28	0.01		5.01			71.53	27.98	0.81		0.715
AGF1-2		Mingled zone (mafic part)	F AGF1-2F3_3	44			51.25	0.07	30.49	0.26	0.04	0.17	13.67	3.65	0.19			99.79		2.34	1.64	0	0.01	0	0.01	0		0.67	0.32	0.01		5.01			66.84	32.29	1.11		0.668
AGF1-2		Mingled zone (mafic part)	F AGF1-2F3_4	45			51.31	0.08	29.82	0.35	0.03	0.16	13.57	4.12	0.13			99.56		2.35	1.61	0	0.01	0	0.01	0		0.67	0.37	0.01		5.03			66.6	36.62	0.78		0.666
AGF1-2		Mingled zone (mafic part)	F AGF1-2F3_5	46			50.76	0.09	30.3	0.57	0	0.27	13.79	3.61	0.27			99.68		2.33	1.64	0	0.02	0	0.02	0		0.68	0.32	0.02		5.02			67.72	32.03	1.61		0.677
																				#DIV/0!	#DIV/0!	#DIV/0!	#DIV/0!	#DIV/0!	#DIV/0!	#DIV/0!		#DIV/0!	#DIV/0!	#DIV/0!		#DIV/0!			#DIV/0!	#DIV/0!	#DIV/0!		#DIV/0!
07-8-1-Z		Mingled zone (felsic part)	F 07-8F3_1	60			60.05	0.01	25.03	0.15	0.02	0	7.23	7.05	0.32			100.12		2.68	1.32	0	0.01	0	0	0		0.35	0.61	0.02		4.98			34.57	60.97	1.83		0.346
07-8-1-Z		Mingled zone (felsic part)	F 07-8F3_2	61			58.88	0.09	25.24	0.18	0.02	0.01	7.53	6.8	0.35			99.24		2.65	1.34	0	0.01	0	0	0		0.36	0.59	0.02		4.98			36.35	59.43	2.01		0.363
07-8-1-Z		Mingled zone (felsic part)	F 07-8F3_3	62			59.28	0.03	25	0.22	0.04	0	7.38	6.94	0.17			99.28		2.67	1.33	0	0.01	0	0	0		0.36	0.61	0.01		4.98			35.6	60.56	1		0.356
07-8-1-Z		Mingled zone (felsic part)	F 07-8F3_4	63			60.3	0.05	24.59	0.15	0.02	0.02	6.65	7.28	0.22			99.3		2.7	1.3	0	0.01	0	0	0		0.32	0.63	0.01		4.97			31.92	63.23	1.26		0.319
07-8-1-Z		Mingled zone (felsic part)	F 07-8F1_1	64			60.46	0.03	24.27	0.12	0.02	0.01	6.28	7.59	0.24			99.11		2.71	1.28	0	0	0	0	0		0.3	0.66	0.01		4.98			30.19	66.07	1.39		0.302
07-8-1-Z		Mingled zone (felsic part)	F 07-8F1_2	65			59.68	0.01	24.85	0.13	0.01	0	7.14	7.04	0.21			99.39		2.68	1.32	0	0	0	0	0		0.34	0.61	0.01		4.97			34.39	61.32	1.21		0.344
07-8-1-Z		Mingled zone (felsic part)	F 07-8F1_3	66			62.76	0.01	23.5	0	0	0	5.33	8.16	0.25			100.28		2.78	1.23	0	0	0	0	0		0.25	0.7	0.01		4.97			25.27	70.01	1.41		0.253
07-8-1-Z		Mingled zone (felsic part)	F 07-8F1_4	67			61.03	0.05	24.33	0.21	0.02	0	6.59	7.14	0.29			99.92		2.72	1.28	0	0.01	0	0	0		0.31	0.62	0.02		4.96			31.48	61.7	1.64		0.315
07-8-1-Z		Mingled zone (felsic part)	F 07-8F1_5	68			59.92	0.01	24.65	0.21	0.01	0.02	7.21	6.98	0.32			99.57		2.69	1.3	0	0.01	0	0	0		0.35	0.61	0.02		4.97			34.64	60.68	1.83		0.346

## Sheet: EMPA Titanite
Table S3e: Electron microprobe data of titanite
sample	rock type	unit	spot	SiO2	TiO2	Al2O3	FeO	MnO	MgO	CaO	Na2O	K2O	Cr2O3	ZrO2	F	Total
0019		Granite	T 0019T1_1	30.2076	37.4425	1.6881	0.7158	0.0724	0.0134	28.4168	0.0143	0.026	0.0921	0	0.8786	99.1978
0019		Granite	T 0019T1_2	30.0419	37.6251	1.3754	0.7719	0.0807	0.0298	27.3737	0.0901	0.0085	0.0202	0.2989	0.874	98.2222
0019		Granite	T 0019T1_3	30.1406	38.8524	0.9021	0.5872	0.0671	0.0333	28.1872	0	0.015	0.0559	0.0228	0	98.8637
0019		Granite	T 0019T1_4	30.0171	36.8476	1.4864	0.8855	0.0661	0.0326	27.0334	0.17	0.0259	0.0142	0.281	1.154	97.5279
0019		Granite	T 0019T1_5	30.101	38.018	1.3222	0.6283	0.0335	0	28.1756	0	0	0.0795	0.2403	1.5423	99.4913
0019		Granite	T 0019T1_6	30.2054	37.6793	1.2753	0.6784	0.0659	0.0527	28.1029	0	0.0258	0.0544	0.1142	0.3888	98.4794
0019		Granite	T 0019T1_7	30.5918	38.4808	1.2066	0.6212	0.0821	0.0212	28.1093	0.0141	0.0317	0.0473	0.0569	0	99.2631
0019		Granite	T 0019T1_8	29.7545	38.5353	1.0558	0.6859	0.0952	0.051	27.6144	0	0.0179	0.0684	0	0	97.8785
0019		Granite	T 0019T1_9	30.6474	39.4619	1.0641	0.5851	0.0371	0.0202	28.1051	0.1078	0.0012	0.0496	0.1335	0.1947	100.326
07-8-1-Z		Upper Gabbro	T 07-8B3_4	32.5822	37.7019	1.5357	0.6488	0.0447	0.0297	28.944	0.0455	0.0308	0.0662	0.1044	0.8811	102.615
07-8-1-Z		Upper Gabbro	T 07-8B3_5	31.8259	38.5008	1.4356	0.4898	0.0435	0.0346	29.0793	0.0053	0.0215	0.0498	0.0179	0.8266	102.331
07-8-1-Z		Upper Gabbro	T 07-8B3_6	31.1092	37.9847	1.4711	0.5306	0.0136	0.0379	28.9993	0.0374	0.0041	0.0642	0.0683	0	100.32
07-8-1-Z		Upper Gabbro	T 07-8B3_7	31.6325	37.6893	1.506	0.4885	0.0692	0	29.2843	0.0454	0.0126	0.0493	0.0033	0	100.78
GIC7C		Mingling Zone	T GIC7CT1_1	31.5326	36.1655	1.9417	1.2214	0.0613	0.0477	28.3513	0.0836	0.0495	0.0474	0.0787	0.606	100.187
GIC7C		Mingling Zone	T GIC7CT1_2	31.575	36.8112	1.1772	1.0464	0.0816	0.0546	27.8999	0.0947	0.0141	0.0359	0	1.2105	100.001
GIC7C		Mingling Zone	T GIC7CT1_3	31.2463	36.4408	1.5148	1.2961	0.0192	0.054	28.272	0.0271	0.0351	0.002	0	0.7174	99.6248
GIC7C		Mingling Zone	T GIC7CT1_4	31.379	36.8556	1.513	1.2217	0.0509	0.0479	28.484	0.0594	0.0141	0.0102	0	0	99.6358
GIC7C		Mingling Zone	T GIC7CT1_5	31.5823	37.0443	1.2804	0.9037	0.0613	0.0211	28.1329	0.0189	0.0106	0.059	0.0196	1.2128	100.347
GIC7C		Mingling Zone	T GIC7CT2_1	31.0978	37.4332	1.2357	0.936	0	0.0448	27.677	0.0567	0.0223	0.0231	0.1537	0	98.6803
GIC7C		Mingling Zone	T GIC7CT2_2	30.8114	37.2007	1.4281	1.0376	0.069	0.0481	27.9751	0.0135	0.0124	0.0753	0.1733	0	98.8445
GIC7C		Mingling Zone	T GIC7CT2_3	30.634	35.8065	1.6986	1.6121	0.0361	0.0451	27.5132	0	0.0027	0.0122	0.113	0.5502	98.0237
GIC7C		Mingling Zone	T GIC7CT2_4	30.9053	35.8125	1.8579	1.3347	0.0646	0.0689	27.8316	0	0.0186	0.0529	0	0	97.9471
GIC7C		Mingling Zone	T GIC7CT2_5	30.3894	36.3893	1.6378	1.1485	0.0805	0.0502	27.547	0.0783	0.0076	0.021	0	0	97.3496

## Sheet: Zircon trace elements
Table S4: Zircon trace element compositions
15 micron spots on polished grains								Trace element in ppm; error in 2 sigma
Sample	map unit	Point	grain	zonation type	core vs rim	CL image		Si	Si 2SE	P	P 2SE	Ti	Ti 2SE	Y	Y 2SE	La	La 2SE	Ce	Ce 2SE	Pr	PR 2SE	Nd	Nd 2SE	Sm	Sm 2SE	Eu	Eu 2SE	Gd	Gd 2SE	Tb	Tb 2SE	Dy	Dy 2SE	Ho	Ho 2SE	Er	Er 2SE	Tm	Tm 2SE	Yb	Yb 2SE	Lu	Lu 2SE	Hf	Hf 2SE	Th	Th 2SE	U	U 2SE
BRGIC10	Felsic segregation	GIC10-1	GIC3_38_2A	unzoned	core	bright		159000	11000	147	18	3.7	1.1	927	89	0.028	0.02	7.5	1.5	0.08	0.052	0.76	0.51	0.7	0.42	0.16	0.11	9.3	3.1	4.41	0.7	67	10	28.3	4.5	148	17	43.5	3.8	409	43	83	11	12420	610	61	5.6	215	21
BRGIC10	Felsic segregation	GIC10-2	GIC3_38_2A	unzoned	core	bright		159000	6100	148	17	5.4	2.8	1068	65	0.016	0.02	9.3	0.97	0.073	0.053	0.69	0.36	0.81	0.47	0.31	0.15	12	3.2	4.41	0.48	74.9	6.2	31.5	1.9	172.7	9.8	48	4	468	33	100	10	12620	730	81	6.8	267	18
BRGIC10	Felsic segregation	GIC10-3	GIC3_38_2A	unzoned	core	bright		156700	9800	149	15	2.7	1.8	1097	53	-0.000222	2e-05	7.8	1.1	0.021	0.026	0.59	0.41	0.83	0.64	0.18	0.12	9.5	2.4	4.46	0.52	74.4	5.1	32.9	3.3	176	13	49	4.6	486	40	98.3	7.3	12890	780	80.9	8.3	277	23
BRGIC10	Felsic segregation	GIC10-4	GIC3_38_2A	unzoned	core	bright		158000	11000	167	15	2.8	2	1195	56	0.0066	0.0094	7.5	1.2	0.021	0.023	0.59	0.39	1.11	0.4	0.14	0.1	11.8	1.7	5.32	0.8	80	11	35.9	3.6	191	11	51	5.4	514	39	110	12	13170	850	85.8	9.5	282	26
BRGIC10	Felsic segregation	GIC10-5	GIC3_38_2A	unzoned	rim	bright		148700	6500	137	15	2.1	2	1950	120	0.011	0.015	13.9	1.9	0.142	0.059	1.78	0.55	3.63	0.95	0.46	0.25	25.2	3.6	10.2	1.4	146	17	59.2	5.5	299	26	75.8	7.7	718	72	149	16	11960	520	235	32	459	70
BRGIC10	Felsic segregation	GIC10-6	GIC3_38_2A	unzoned	rim	dark		161400	8400	141	11	3.5	1.9	1870	130	0.007	0.01	12.9	1.5	0.049	0.028	1.05	0.43	2.6	1	0.52	0.21	26.5	4.5	9.9	1.1	144	20	56.8	5.9	286	19	73	5.6	715	78	145	12	12430	630	215	30	453	54
BRGIC10	Felsic segregation	GIC10-7	GIC3_38_2B	sector	core	bright		160400	7600	320	18	2.5	1.6	2430	130	0.008	0.016	14	1.5	0.086	0.059	1.28	0.25	2.7	0.53	0.53	0.13	28.4	2.5	11.3	1.1	174	11	76.5	4.6	385	22	101.4	5.4	965	81	191	15	11030	690	316	16	621	30
BRGIC10	Felsic segregation	GIC10-8	GIC3_38_2B	sector	core	bright		158400	7600	322	37	2.4	1.6	2710	180	0.017	0.02	17.2	2	0.079	0.051	1.23	0.37	2.45	0.74	0.44	0.22	27	4.6	12.23	0.85	185	13	80.9	4.7	414	27	110.8	7.5	1023	71	199	13	11000	630	357	33	710	54
BRGIC10	Felsic segregation	GIC10-9	GIC3_38_2B	sector	rim	bright		151400	7300	270	14	3.4	2	2276	66	0.019	0.022	14.7	1.7	0.095	0.052	0.49	0.26	2	0.38	0.46	0.22	23.9	2	10.6	1	154	10	68.3	4.1	366	23	93.1	7.3	826	53	170	8.7	11210	350	257	13	569	31
BRGIC10	Felsic segregation	GIC10-10	GIC3_38_2B	sector	core	bright		151500	5600	190	18	3.8	1.8	2427	80	0.006	0.013	27.3	3.4	0.095	0.046	1.63	0.55	3.5	0.9	0.5	0.14	29.7	4.4	11.9	1.2	173.5	9.8	77.1	4.7	366	19	95	8.1	856	48	169	11	11100	500	382	45	671	34
BRGIC10	Felsic segregation	GIC10-11	GIC3_38_2B	sector	rim	dark		155900	5600	159	18	3.7	2.1	2350	120	0.017	0.02	30.7	2.3	0.131	0.067	1.67	0.41	3.44	0.72	0.62	0.22	27.4	3.6	11.41	0.87	182	15	71.2	4	355	21	90.5	5.4	857	54	173.1	7.5	11400	500	392	21	679	56
BRGIC10	Felsic segregation	GIC10-12	GIC3_38_2B	sector	rim	dark		155100	6900	146	18	2.2	2.4	2180	76	0.01	0.014	27.2	2.8	0.114	0.05	1.39	0.41	2.32	0.92	0.38	0.23	25.4	4.1	11.3	1.1	156	12	67.3	5.8	335	23	85.6	5.7	768	36	147.8	6	11640	330	445	15	694	38
BRGIC10	Felsic segregation	GIC10-13	GIC3_40_2	unzoned	rim	bright		158900	8400	172	16	1.1	1.8	1349	72	0.021	0.024	8.62	0.93	0.057	0.045	1	0.53	1.1	0.42	0.19	0.12	14.5	3.5	5.4	0.75	96	11	40	3.4	222	17	58.8	4.5	543	37	116.5	7.3	12860	640	110.6	8.9	320	21
BRGIC10	Felsic segregation	GIC10-14	GIC3_40_2	unzoned	core	bright		154200	7400	175	17	2	1.2	1210	74	0.0042	0.0088	7.3	0.85	0.009	0.018	0.62	0.31	1.13	0.68	0.172	0.076	10	2.3	5.69	0.71	85	11	35.9	3.5	198	18	54.1	4.4	523	49	111.8	8.5	12190	570	96.7	7.9	309	29
BRGIC10	Felsic segregation	GIC10-15	GIC3_40_2	unzoned	core	bright		148700	6800	170	15	2.4	1.6	1223	57	0.008	0.017	7.07	0.53	0.014	0.028	0.44	0.3	1.25	0.62	0.16	0.12	12.4	2.5	5.73	0.94	84.4	4.4	37.4	3.2	204	17	52.8	4.7	506	34	106.6	7.4	12230	430	87.6	5.1	300	25
BRGIC10	Felsic segregation	GIC10-16	GIC3_40_2	unzoned	core	bright		157700	8200	166	13	3.3	1.5	1322	63	0.0032	0.0069	8.4	1	0.063	0.058	0.47	0.32	1.65	0.64	0.165	0.096	12.7	2.8	4.82	0.75	83.1	6.9	37.5	1.6	199.6	9.4	52.3	4.1	519	29	108.5	6.1	12130	540	92.2	8.6	308	36
BRGIC10	Felsic segregation	GIC10-17	GIC3_40_2	unzoned	core	bright		154800	5000	176	16	4	1.4	1304	65	0.0032	0.0069	8.53	0.86	0.014	0.02	0.47	0.27	0.88	0.36	0.19	0.11	11.4	2.5	5.82	0.66	87.4	8	39.9	3	211	10	58	3.8	547	37	117	11	12750	660	99.1	8.1	325	30
BRGIC10	Felsic segregation	GIC10-18	GIC3_40_2	unzoned	rim	bright		153600	5500	171	17	2.1	1.6	1269	63	0.0036	0.0077	7.87	0.88	0.045	0.033	0.5	0.31	1.42	0.46	0.18	0.14	11	3	5.89	0.61	86.6	6.9	37.3	2.2	210	11	54.6	3.2	534	28	108	8.3	12440	740	97	10	313	24
BRGIC10	Felsic segregation	GIC10-19	GIC3_41_2	sector	rim	bright		153400	7400	104	14	8.1	2.8	963	57	0.008	0.011	4.72	0.48	0.079	0.042	0.87	0.3	2.06	0.73	0.33	0.38	10.8	2.5	5.1	0.61	72.3	6.5	31.9	2.4	141.5	7.3	40.1	2.2	359	18	81.7	4.8	8850	290	60.7	4.1	155.6	9.4
BRGIC10	Felsic segregation	GIC10-20	GIC3_41_2	sector	core	dark		160800	8100	90.9	9.3	8.4	2.9	1977	86	0.0036	0.0077	5.4	0.48	0.203	0.093	3.41	0.75	5.77	0.76	1.01	0.31	32.2	4.2	13.5	1.2	158	14	63.9	3.9	293	18	70.7	4.6	642	44	121.1	8.1	8850	470	129	9.1	203	13
BRGIC10	Felsic segregation	GIC10-21	GIC3_41_2	sector	rim	bright		148500	7600	106	13	7.3	3.3	1269	42	0.01	0.02	6.56	0.95	0.06	0.05	1.1	0.43	1.97	0.78	0.5	0.22	13.2	2.2	5.5	0.87	92.2	6.6	37.3	3.4	203	17	51.9	4.4	521	44	109.3	6.8	8710	600	67.4	4.7	191	10
BRGIC10	Felsic segregation	GIC10-22	GIC3_41_2	sector	core	very bright		155900	6900	114	12	7.2	2.4	852	35	0.0037	0.0079	4.2	0.84	0.027	0.026	0.6	0.35	0.61	0.46	0.28	0.13	9.7	2.3	3.95	0.52	58	5.3	23.8	1.8	132	11	34.6	3.4	320	21	66.7	4.5	9380	570	38.6	3.8	106.2	6.9
BRGIC10	Felsic segregation	GIC10-23	GIC3_41_2	sector	rim	bright		146600	7300	98	12	7.1	2.1	1016	46	-0.000233	1.9e-05	5.1	0.71	0.056	0.033	0.59	0.3	1.42	0.73	0.28	0.22	12.1	1.9	5.24	0.5	73.7	6.7	31.2	3.3	171	15	44.4	3.5	438	32	89.3	7.5	8780	550	63.6	5.7	170	12
BRGIC10	Felsic segregation	GIC10-24	GIC3_41_2	sector	rim	bright		155900	9700	98	18	7.7	2.8	1123	39	0.01	0.02	5.05	0.67	0.072	0.037	0.53	0.34	1.28	0.68	0.42	0.13	14.5	3.3	5.3	0.7	76.5	6.4	32.7	1.9	176	14	44.1	3.3	469	30	100	7	8830	350	65.7	3.6	179	7.6
BRGIC10	Felsic segregation	GIC10-25	GIC3_29_2A	sector	rim	very bright		159900	8900	217	21	2	1.3	1645	54	0.0032	0.0068	8.03	0.96	0.05	0.058	0.76	0.42	1.78	0.67	0.21	0.14	14.9	2.2	6.96	0.85	111	11	50.7	3.2	270	16	66.4	5.7	672	40	137.4	7.7	12560	440	138	11	392	19
BRGIC10	Felsic segregation	GIC10-26	GIC3_29_2A	sector	rim	bright		152700	7600	399	30	5.3	2.2	4180	200	0.0032	0.0068	34.7	2.2	0.104	0.047	2.57	0.66	5.9	1.3	0.95	0.29	48.2	5.5	21.14	0.99	309	16	125.6	6.9	647	36	151.4	8.5	1478	54	284	16	10220	540	706	31	1064	61
BRGIC10	Felsic segregation	GIC10-27	GIC3_29_2A	sector	core	dark		156000	6200	360	32	3.6	1.1	4670	210	0.044	0.03	60	3.7	0.187	0.08	3.41	0.63	8.2	1.4	1.13	0.28	68.2	8.8	27.2	1.1	398	32	148.9	9.2	730	19	176	14	1583	65	303	16	10400	460	1924	97	1801	91
BRGIC10	Felsic segregation	GIC10-28	GIC3_29_2A	sector	core	bright		155000	10000	219	17	6.3	2.1	4660	260	0.01	0.011	80.6	3.3	0.182	0.056	3.26	0.56	6.4	1.6	1.04	0.34	65.7	5.7	25	1.3	366	16	150.2	7.7	733	41	173.1	7.9	1528	72	306	16	10410	550	1199	84	1552	72
BRGIC10	Felsic segregation	GIC10-29	GIC3_29_2A	sector	rim	bright		155000	10000	226	26	4.5	1.7	3950	230	0.011	0.016	66.3	5.2	0.17	0.1	3.23	0.62	5.9	1.5	1	0.3	50.6	4.8	20.4	1.2	298	20	123.1	8.3	611	34	146.8	7.2	1341	93	269	20	11480	660	903	63	1142	67
BRGIC10	Felsic segregation	GIC10-30	GIC3_29_2A	sector	rim	very bright		162700	8100	206	17	2.3	1.2	2640	240	0.009	0.013	15	2.5	0.113	0.067	2.48	0.94	3.8	1.5	0.7	0.26	32.1	6.7	13.2	1.5	186	27	78	8.3	392	39	101	10	926	92	190	14	11930	640	316	62	601	91
BRGIC10	Felsic segregation	GIC10-31	GIC3_29_2B	sector	rim	dark		152100	7600	552	67	4.6	1.3	5420	930	0.009	0.014	65	15	0.11	0.092	2.7	1.2	5	1.2	0.59	0.21	57	15	26.6	5.7	400	74	168	33	870	170	217	41	1850	320	359	56	12980	750	1320	350	2100	480
BRGIC10	Felsic segregation	GIC10-32	GIC3_29_2B	sector	core	bright		152000	5800	251	26	4.6	1.6	1920	210	0.0043	0.009	12	2.6	0.069	0.044	0.68	0.35	1.5	0.55	0.39	0.2	18.5	4.4	8.7	1.4	129	19	58.5	4.6	295	37	79.1	7.7	721	70	155	15	12230	650	194	39	498	83
BRGIC10	Felsic segregation	GIC10-33	GIC3_29_2B	sector	core	very bright		152900	9600	195	21	4.5	1.5	1490	100	-0.000225	2.3e-05	9.4	1.1	0.038	0.027	0.42	0.27	1.17	0.5	0.16	0.1	14.6	2.7	6.64	0.88	107.7	9	47.8	4.5	255	21	67.3	6.2	644	42	129	10	12760	850	127	12	371	33
BRGIC10	Felsic segregation	GIC10-34	GIC3_29_2B	sector	rim	bright		164000	11000	131	20	4	2.7	2800	170	0.012	0.018	21.2	2.4	0.195	0.074	2.6	0.39	4.94	0.99	0.85	0.32	39.7	5.5	16.6	1.5	217	17	87.5	7.7	422	26	106.4	8.3	943	58	198.2	9.3	12740	850	439	42	658	46
BRGIC10	Felsic segregation	GIC10-35	GIC3_30_2A	unzoned	rim	bright		157400	8300	110.7	9.7	3.8	1.9	1230	43	-0.000225	2.2e-05	13.73	0.9	0.024	0.027	0.84	0.34	1.12	0.4	0.33	0.22	13.1	2.9	5.08	0.62	84.9	7.7	35.8	2.6	194.7	9.3	50.4	3.7	476	27	98.4	6.6	12790	480	215	11	469	40
BRGIC10	Felsic segregation	GIC10-36	GIC3_30_2A	unzoned	core	bright		157700	6900	99.1	8.2	4.6	1.7	1095	52	0.01	0.016	13.01	0.96	0.009	0.013	0.91	0.41	1.14	0.38	0.22	0.11	11.2	2.4	5.29	0.62	77.9	7.7	34.7	2.8	180	13	47.9	3.4	433	39	88.6	9.3	12690	920	187	15	397	32
BRGIC10	Felsic segregation	GIC10-37	GIC3_30_2A	unzoned	core	bright		152700	7500	86.1	9.6	5.3	1.9	1065	61	0.0029	0.0063	13.1	1.2	0.105	0.071	0.85	0.36	1.23	0.68	0.28	0.14	12.4	2.2	5.22	0.88	76.6	6.7	32.4	2.2	168.1	9.2	43.5	2.3	423	23	84.3	4.8	12360	590	168	11	374	23
BRGIC10	Felsic segregation	GIC10-38	GIC3_30_2A	unzoned	core	bright		155100	9300	82	9.9	5	2.5	1079	54	0.0067	0.0094	12.2	1.8	0.037	0.029	0.27	0.16	1.6	0.62	0.089	0.066	12.4	2.6	5	1.2	75.9	5.1	32.5	3.2	178	16	46	3.4	447	30	93.1	6	12590	590	148	9.9	353	18
BRGIC10	Felsic segregation	GIC10-39	GIC3_30_2A	unzoned	rim	bright		159600	6700	94	16	4.3	2	1107	44	0.011	0.012	12.4	1.5	0.041	0.031	0.35	0.26	1.04	0.44	0.24	0.1	13.9	2.3	5.13	0.53	81	12	35.9	3	176	14	45.1	3.9	442	23	95.8	6.8	12470	720	152	12	367	34
BRGIC10	Felsic segregation	GIC10-40	GIC3_30_2B	sector	rim	bright		151500	9100	137	14	4.7	2.4	1593	78	0.017	0.016	20.5	2.3	0.052	0.041	0.67	0.37	1.33	0.64	0.19	0.12	16.6	3.5	6.81	0.88	111.9	7.2	49.4	3.6	247	14	68.8	5.5	643	34	127.3	8	10660	600	172	13	390	34
BRGIC10	Felsic segregation	GIC10-42	GIC3_30_2B	sector	core	bright		159100	8900	113	15	3.5	1.2	2610	120	0.02	0.023	20	1.7	0.081	0.059	2	0.5	4.26	0.91	0.7	0.24	37.2	4.2	15	1.4	201	15	86.2	6.3	410	23	100.1	7	888	44	172	14	10890	670	329	23	492	26
BRGIC10	Felsic segregation	GIC10-43	GIC3_30_2B	sector	core	very bright		157500	8800	173	14	3.9	2	1542	60	-0.000217	1.8e-05	13.5	1.1	0.039	0.028	0.42	0.25	1.66	0.83	0.26	0.15	14.9	2.1	7.61	0.85	104.7	8.5	46.9	3.1	232	15	62.5	2.3	637	23	128.1	5.5	11030	430	152.8	6.3	370	18
BRGIC10	Felsic segregation	GIC10-44	GIC3_30_2B	sector	rim	dark		146200	8500	148	20	3.5	1.2	2730	130	0.006	0.013	27.2	2.1	0.119	0.062	1.78	0.46	4.3	1.2	0.6	0.23	37	4.6	14	1.5	213	14	84.8	5.5	415	27	98.5	8	931	56	185	12	10480	500	334	33	560	59
BRGIC10	Felsic segregation	GIC10-45	GIC3_32_2	sector	rim	bright		159100	6900	118.3	9.9	5	2.1	1543	73	-0.000209	1.9e-05	20	1.7	0.058	0.036	0.61	0.26	1.87	0.74	0.17	0.13	17.8	2.5	7.04	0.7	105.4	7.5	50.8	3.2	250	15	63.3	4.4	604	40	126.6	9.2	12420	820	362	19	655	41
BRGIC10	Felsic segregation	GIC10-46	GIC3_32_2	sector	core	very bright		156000	12000	113	12	3.5	1.1	1324	45	0.0034	0.0072	13.6	1.5	0.071	0.053	0.94	0.28	1.91	0.93	0.3	0.17	15.3	2.2	6.8	0.85	95.1	8.7	41.3	3	210.1	8.9	56	3	511	37	106.8	7.7	12790	610	224	13	446	22
BRGIC10	Felsic segregation	GIC10-47	GIC3_32_2	sector	rim	bright		154600	8100	182	15	4.9	1.8	2891	91	0.0032	0.0069	41.2	4.3	0.157	0.074	1.93	0.76	4.5	0.97	0.77	0.18	36.2	3.7	15.2	1	217	19	89.6	5.9	449	26	107.5	7.1	1016	66	190	15	11860	420	833	81	1046	86
BRGIC10	Felsic segregation	GIC10-48	GIC3_32_2	sector	rim	dark		159600	6300	335	33	5.2	1.7	6190	270	0.016	0.018	94.5	5.5	0.447	0.099	4.57	0.92	9.9	1.4	2.02	0.44	95.6	9.6	35.3	2.3	495	24	203	11	930	56	246	18	2020	150	398	21	10700	550	1660	110	2160	150
BRGIC10	Felsic segregation	GIC10-49	GIC3_32_2	sector	core	bright		158600	8500	387	25	4.2	1.3	3790	360	0.012	0.018	30.8	4.5	0.206	0.054	2.09	0.46	4.1	1	0.81	0.23	42.4	4.8	19.5	1.7	283	31	125	11	604	49	151	14	1395	87	277	23	10680	520	652	90	1067	82
BRGIC10	Felsic segregation	GIC10-50	GIC3_32_2	sector	core	very bright		154000	10000	231	23	4.6	1.5	1960	100	0.032	0.023	12.2	1.3	0.142	0.062	0.9	0.29	1.88	0.56	0.29	0.13	18.5	2.5	9.13	0.9	142.2	7.7	61.6	3	318	18	82.8	5.6	837	51	159.2	7.8	11320	630	183	11	451	32
BRGIC10	Felsic segregation	GIC10-51	GIC3_32_2	sector	core	very bright		158900	9700	143	17	8	3.1	1076	60	0.138	0.048	10.6	1.4	0.236	0.078	1.32	0.34	1.83	0.48	0.19	0.11	11.1	1.7	4.56	0.56	74.5	5.3	33.9	2.6	171	12	46.7	3.4	467	26	94.6	5.6	12900	890	120	14	280	15
BRGIC10	Felsic segregation	GIC10-52	GIC3_32_2	concentric		dark		151900	7700	164	22	2.93	0.91	3740	240	0.014	0.015	26.1	1.6	0.32	0.1	4.27	0.96	8.3	1.3	1.05	0.31	54.6	7.7	22.7	1.9	297	20	124	10	601	40	144	11	1269	90	250	18	11470	770	600	35	789	38
BRGIC10	Felsic segregation	GIC10-53	GIC3_33_2	concentric		bright		157900	8800	127.1	7.5	4.4	2	1799	89	0.007	0.014	24.9	2.4	0.077	0.069	1.2	0.41	2.34	0.59	0.43	0.17	24.2	4.2	9.78	0.84	146	12	59	3.4	298	14	71.2	3.7	667	35	132.2	7.3	11280	590	306	14	612	50
BRGIC10	Felsic segregation	GIC10-54	GIC3_33_2	concentric		bright		147500	6000	89.7	7	4	1.6	990	43	0.013	0.015	13.2	2.3	0.032	0.039	0.55	0.31	1.2	0.52	0.26	0.16	10.4	2.3	4.74	0.33	70.1	6.6	31.1	2.5	159	14	39.3	3.2	389	32	74.7	5.1	11580	720	147.1	9.7	337	28
BRGIC10	Felsic segregation	GIC10-55	GIC3_33_2	concentric		very bright		160300	7900	105.3	8.4	4.1	1.5	1385	85	0.008	0.017	16.8	1.1	0.047	0.033	0.81	0.28	1.69	0.72	0.2	0.11	15.4	3.1	7.21	0.99	108	10	40.2	3.3	223	11	57.9	5.2	532	37	108.7	6.5	12040	770	187	12	414	35
BRGIC10	Felsic segregation	GIC10-56	GIC3_33_2	concentric		bright		154900	7200	85	11	4.4	1.3	904	37	0.0036	0.0076	10.12	0.98	0.024	0.028	0.43	0.26	0.99	0.49	0.3	0.1	9.2	2.1	4.53	0.33	67.9	8.5	29.5	1.9	146	13	40.6	2.9	388	17	76.9	5.3	12870	840	130.2	9.9	344	28
BRGIC10	Felsic segregation	GIC10-57	GIC3_33_2	concentric		bright		157400	7100	132	21	4.6	1.9	1690	90	0.015	0.025	25	1.6	0.071	0.057	0.75	0.35	2.04	0.61	0.23	0.14	19.3	2.5	8.15	0.89	121.7	5.2	52.3	3.3	271	17	72.5	4.6	672	36	134.3	8.8	13820	620	378	23	768	43
BRGIC10	Felsic segregation	GIC10-58	GIC3_33_2	concentric		bright		157700	7300	172	20	3.3	1.3	2510	140	0.012	0.015	38	1.3	0.084	0.052	0.88	0.4	2.59	0.87	0.31	0.14	27.8	3.6	11.34	0.98	186	11	80.1	3.5	410	31	112.3	4.9	1075	60	214	12	15930	650	501	29	1658	69
BRGIC10	Felsic segregation	GIC10-59	GIC3.34.2	concentric	core	dark		156200	8800	237	15	6.4	2.2	4750	180	0.017	0.022	82.9	5.4	0.251	0.075	3.33	0.46	6	1.4	1.28	0.3	63.3	4.9	26	1.5	382	30	152	12	759	49	182.4	9.2	1650	140	317	24	10410	440	1237	72	1930	140
BRGIC10	Felsic segregation	GIC10-60	GIC3.34.2	concentric	core	dark		161000	8700	242	19	4.4	1.9	4700	260	0.009	0.014	83.4	4.5	0.212	0.072	3.67	0.74	5.55	0.74	1.09	0.42	69.8	5.3	29	2.6	387	22	152	11	744	45	178	10	1485	81	293	19	10750	670	2860	280	2380	170
BRGIC10	Felsic segregation	GIC10-61	GIC3.34.2	concentric	core	bright		153900	6400	175	13	4.5	1.4	2445	80	0.017	0.027	36.2	4.1	0.072	0.057	1.85	0.65	3.22	0.95	0.81	0.22	35.4	5.8	13.02	0.72	202	16	82.2	4.5	400	27	99.7	8	890	52	168.7	6.9	11160	480	1010	100	1208	95
BRGIC10	Felsic segregation	GIC10-62	GIC3.34.2	concentric	rim	very bright		154900	8500	109	11	4.1	1.8	1277	59	0.0035	0.0074	14.7	1.3	0.062	0.038	0.92	0.46	1.9	0.49	0.28	0.21	14.8	2.9	5.85	0.67	85.2	6.7	40.3	1.9	206.3	9.9	51.4	3.1	506	24	103.2	7.5	12260	670	258	12	485	21
BRGIC10	Felsic segregation	GIC10-63	GIC3.34.2	concentric	rim	very bright		159900	5100	135	15	3.6	1.5	1686	62	0.009	0.012	23.2	1.8	0.022	0.021	1.04	0.42	2.24	0.82	0.4	0.16	18.3	2.5	7.73	0.64	127.1	9.5	52.4	3.2	274	15	71.6	5.2	667	39	134.9	6.4	13750	710	498	29	947	64
BRGIC10	Felsic segregation	GIC10-64	GIC3_35_2	unzoned	rim	dark		158000	12000	134	12	5.1	2.4	2690	140	0.0029	0.0062	19	2	0.15	0.065	2.72	0.64	3.8	1.1	0.68	0.24	31.2	4.7	13.3	1.4	197	13	85.1	6	440	32	119.9	7.8	1086	74	222	14	10120	570	287	14	588	47
BRGIC10	Felsic segregation	GIC10-65	GIC3_35_2	unzoned	rim	bright		152400	8400	113	13	4.5	1.4	1664	82	-0.000209	1.8e-05	12.8	1.3	0.067	0.038	0.69	0.28	1.77	0.67	0.55	0.25	16.3	2.7	7.71	0.75	111	10	51.6	4.5	270	20	74.3	6	689	42	133.5	8.1	10520	550	147	13	339	29
BRGIC10	Felsic segregation	GIC10-66	GIC3_35_2	unzoned	rim	bright		149900	6400	115.8	8.5	6	1.8	1481	78	0.013	0.014	15.1	1.3	0.1	0.04	1.07	0.31	2.37	0.9	0.42	0.17	17.8	3.5	7.14	0.76	108.7	8.2	48.9	3.9	235	13	61.3	2.8	578	36	121.7	6.4	9960	670	218	18	390	27
BRGIC10	Felsic segregation	GIC10-67	GIC3_35_2	unzoned	core	bright		150800	8600	99	14	4.9	2.2	1317	40	0.0038	0.0081	13.4	1.3	0.084	0.043	1.15	0.42	1.78	0.59	0.27	0.16	16.4	3.6	6.4	0.51	98.8	6.1	41.6	2.5	206	11	53.4	4	473	23	100.2	4.5	10090	480	177	12	344	26
BRGIC10	Felsic segregation	GIC10-68	GIC3_35_2	unzoned	core	bright		157200	6000	108	12	7.4	3.1	1503	58	0.006	0.012	14.1	1.4	0.061	0.04	1.29	0.38	2.39	0.85	0.56	0.24	17.8	3.3	7.29	0.7	113.2	8.1	45.7	2.9	240	14	60.1	2.7	556	23	113.2	5.8	10260	570	207	13	368	24
BRGIC10	Felsic segregation	GIC10-69	GIC3_35_2	unzoned	rim	bright		159000	6000	94	13	4.81	0.97	1351	70	0.038	0.036	11.35	0.99	0.04	0.047	0.6	0.36	1.51	0.54	0.35	0.15	13.6	2.7	6.16	0.79	92.4	7	41.4	2.5	218	19	54.6	4.5	537	42	113.6	7.3	10550	520	114	11	265	33
BRGIC3	Meladiorite	GIC 3-1	GIC3_24_2A	sector	rim	dark		155000	10000	65	11	5.2	2.1	479	29	0.006	0.013	3.34	0.32	0.008	0.011	0.18	0.12	0.24	0.19	0.119	0.084	6.2	2	2.14	0.41	34.4	3.8	14.8	1	79	8.5	20.4	1.7	199	19	39.6	3.9	14600	1200	66.4	7.6	370	120
BRGIC3	Meladiorite	GIC 3-2	GIC3_24_2A	sector	core	bright		157900	8700	76	11	6.8	2.2	580	20	0.006	0.012	3.44	0.6	0.0038	0.0082	0.21	0.16	0.84	0.29	0.26	0.16	6.2	1.7	2.97	0.7	46.6	5.6	18.7	1.8	95.3	5.4	22.2	1.6	219	14	41.8	1.8	12340	390	53.8	4.4	172	17
BRGIC3	Meladiorite	GIC 3-3	GIC3_24_2A	sector	rim	bright		154600	7200	79.7	9.6	4.1	1.7	980	88	0.0029	0.0061	6.4	0.78	0.035	0.029	0.35	0.28	0.98	0.44	0.139	0.08	11.6	2.4	5.04	0.89	73.4	9.1	29.8	3.6	155	22	40.9	5.1	368	43	70.3	9.8	14290	770	199	43	516	46
BRGIC3	Meladiorite	GIC 3-4	GIC3_24_2A	sector		dark		152300	7600	60	12	15.7	7	1170	400	0.12	0.16	3.32	0.85	0.21	0.1	1.55	0.77	2.6	1.2	0.55	0.36	19.2	7.2	7.8	3.1	100	43	39	15	182	67	39	15	340	120	60	19	9400	700	46	21	94	35
BRGIC3	Meladiorite	GIC 3-5	GIC3_24_2A	sector	rim	bright		153000	9900	86	10	8	2.2	1340	320	-0.000204	2e-05	2.98	0.48	0.099	0.062	2.22	0.9	3.2	1.4	0.49	0.3	21.5	6.3	8.3	2.4	118	30	46.4	9.9	213	46	52.4	9.5	411	67	77	13	9790	400	61	18	126	18
BRGIC3	Meladiorite	GIC 3-6	GIC3_24_2A	sector	rim	dark		160400	6500	61	8	8.2	1.7	670	47	-0.000208	1.7e-05	3.82	0.54	0.02	0.023	0.45	0.2	1.11	0.83	0.23	0.13	10.3	1.5	3.88	0.41	55.7	4.2	23.2	1.9	110.9	7.3	25.2	2.2	222	15	44.3	3.6	10750	360	40.8	2.2	117.3	6.8
BRGIC3	Meladiorite	GIC 3-7	GIC3_24_2A	sector	rim	bright		156400	8500	74	10	3.9	2.1	801	54	0.005	0.01	5.82	0.65	0.023	0.025	0.44	0.24	0.9	0.51	0.17	0.1	8.3	2	4.44	0.65	63.7	5.9	25.8	2.3	126.5	6.6	34.4	3.9	311	20	59.6	4.5	14230	790	158	15	412	26
BRGIC3	Meladiorite	GIC 3-8	GIC3_24_2B	patchy	rim	bright		156000	9600	57	8.4	4.6	1.8	466	15	0.0039	0.0081	2.64	0.6	0.016	0.025	0.25	0.18	0.85	0.34	0.13	0.15	4.9	2	2.42	0.41	32.3	3.7	14.95	0.96	72.6	4.6	18.2	1.5	169	14	30.7	1.8	11160	540	25.4	2.1	85.8	9
BRGIC3	Meladiorite	GIC 3-9	GIC3_24_2B	patchy	rim	bright		152000	11000	55	12	5.2	1.5	455	30	0.0029	0.0062	2.82	0.52	0.02	0.017	0.27	0.28	0.28	0.26	0.061	0.067	3.9	1.2	2.21	0.38	30.3	3.7	13.6	1.5	69.2	7.6	18.3	2.4	153	17	30.3	2.8	10800	770	19.4	2.4	63.3	4.6
BRGIC3	Meladiorite	GIC 3-10	GIC3_24_2B	patchy	core	dark		151300	9300	50.3	7.8	6.8	2.1	409	18	0.0068	0.0095	2.74	0.45	0.024	0.023	0.34	0.35	0.14	0.12	0.045	0.051	5.1	1.5	2.39	0.34	32.8	5.1	13.97	0.88	68.4	5.1	16.6	1.3	153.9	9	28.7	1.5	11040	520	20.9	2.2	75.7	5.9
BRGIC3	Meladiorite	GIC 3-11	GIC3_24_2B	patchy		dark		148800	7000	48	12	7.3	2.2	488	39	0.0038	0.008	2.14	0.48	0.006	0.012	0.19	0.19	0.7	0.62	0.13	0.12	5.7	1.1	2.63	0.5	37.8	4.2	16.1	1.6	82	10	20.3	2	177	17	36	4.2	10400	300	20.8	3.6	69.7	4.6
BRGIC3	Meladiorite	GIC 3-12	GIC3_24_2B	patchy	core	bright		154800	8100	40.9	9.4	7.5	2.3	323	23	-0.0002	1.6e-05	1.98	0.26	0.023	0.027	0.28	0.2	0.21	0.15	0.064	0.059	4.52	0.91	1.88	0.17	24.9	2.5	9.5	1.1	53.6	5.2	13.11	0.85	120	12	22.6	1.7	11530	640	16.4	1.2	61	4.7
BRGIC3	Meladiorite	GIC 3-13	GIC3_24_2B	patchy	rim	dark		148000	11000	51	13	6.1	2.3	326	28	0.016	0.023	1.67	0.46	0.028	0.026	0.16	0.13	0.41	0.35	0.087	0.068	4.5	1.4	1.36	0.34	23.5	4.2	9.99	0.84	52.6	5.2	13.1	1.2	116.9	9.2	23.4	2.1	10760	580	12.7	1.7	51.6	3.9
BRGIC3	Meladiorite	GIC 3-14	GIC3_24_2B	patchy	cre	bright		147000	8000	50.7	8.9	7.2	2.9	335	38	-0.000195	1.6e-05	2.08	0.28	0.005	0.011	0.23	0.16	0.29	0.28	0.039	0.055	3.91	0.91	1.68	0.42	25.1	4.5	11	1.8	56.4	7.5	13.7	1.5	125	15	24.3	3.1	11130	560	17	1.4	63.3	5.6
BRGIC3	Meladiorite	GIC 3-15	GIC3_24_2B	patchy	core	bright		156500	7300	55	14	9.1	2.4	900	340	0.017	0.02	3.02	0.82	0.069	0.052	1.01	0.56	2.6	1.5	0.38	0.25	15.2	6.8	5.7	2.7	79	33	34	13	157	59	37	13	296	99	56	18	10590	630	47	19	104	28
BRGIC3	Meladiorite	GIC 3-16	GIC3_27_2A	concentric	rim	bright		153100	7400	74	12	5.4	1.8	820	35	-0.000203	2.4e-05	5.42	0.62	0.014	0.021	0.33	0.26	1	0.56	0.072	0.063	9.4	2.2	3.66	0.71	62.9	5.2	24.6	2.4	127	12	33.7	2	292	22	52.9	5.1	12760	610	110.5	9.7	278	25
BRGIC3	Meladiorite	GIC 3-17	GIC3_27_2A	concentric	rim	bright		154100	8300	63	11	6	2.6	682	45	0.0041	0.0086	3.31	0.5	0.032	0.025	0.31	0.3	0.86	0.61	0.167	0.085	8.1	2.3	3.26	0.33	51.2	4.6	21	1.8	106.6	8.3	24.8	1.8	238	21	44.5	2.6	11370	690	46.7	4.1	121	13
BRGIC3	Meladiorite	GIC 3-18	GIC3_27_2A	concentric	core	dark		148600	7500	74	7.9	8.6	1.6	1810	130	0.01	0.014	4.43	0.66	0.275	0.097	2.87	0.76	5.4	1	0.96	0.19	30.8	2.5	12.2	1	161	10	60.6	3.7	277	18	63.6	4.9	534	40	94.7	5.5	9020	400	90.6	5.1	169.8	7.3
BRGIC3	Meladiorite	GIC 3-19	GIC3_27_2A	concentric	core	drak		147900	7600	72	12	8	2.8	1843	96	0.008	0.011	3.69	0.45	0.201	0.061	3.22	0.66	4.14	0.66	0.72	0.26	35.4	4.7	12.7	1	161.1	9.2	60.8	3.2	278	21	63.2	3.9	518	17	95.9	4.5	9230	490	90.6	5.6	167	11
BRGIC3	Meladiorite	GIC 3-20	GIC3_27_2A	concentric	core	dark		149600	9400	72.9	9.7	8.7	2.9	1720	100	0.004	0.0083	3.69	0.53	0.207	0.073	2.79	0.6	5.1	1.2	0.81	0.22	33.7	3.7	12.53	0.93	161	13	58.8	3.7	258	15	60.7	4.1	482	26	89.4	6.3	9180	480	77.2	4.1	157.2	8.8
BRGIC3	Meladiorite	GIC 3-21	GIC3_27_2A	concentric	rim	bright		155100	7400	83.4	9.5	9.6	3.3	1110	130	-0.000206	1.7e-05	2.95	0.52	0.124	0.057	1.17	0.46	1.68	0.35	0.33	0.11	19.9	2.3	6.5	1.1	93.6	8.8	34.8	3.6	170	14	38.3	5.6	332	28	61.3	4.7	9500	470	45.7	6.3	108	16
BRGIC3	Meladiorite	GIC 3-22	GIC3_27_2A	concentric	rim	bright		152800	7300	66	11	4.8	1.3	828	41	0.023	0.022	6.19	0.79	0.033	0.031	0.37	0.23	0.65	0.39	0.17	0.12	9.7	1.7	3.98	0.39	57.2	3.7	25.8	1.8	135.9	8.6	33.9	2.7	310	22	60.3	5.4	13920	660	154	18	397	57
BRGIC3	Meladiorite	GIC 3-23	GIC3_27_2B	sector	rim	dark		157900	9200	86	15	5.1	1.3	1166	53	-0.000209	2.2e-05	8.5	0.87	0.023	0.021	0.47	0.27	2.19	0.79	0.25	0.15	12.8	2.1	5.52	0.68	90.2	6.3	35.9	2.5	186	12	45.3	2.4	412	22	76.4	5.2	16260	760	397	20	830	29
BRGIC3	Meladiorite	GIC 3-24	GIC3_27_2B	sector	rim	dark		160000	10000	95	12	16	14	1167	43	0.35	0.35	9.7	1.4	0.21	0.16	1.07	0.56	2.11	0.56	0.16	0.1	14.7	2.4	5.74	0.72	83.5	5.8	36	3	178	16	44.1	2.9	407	43	75.5	5	15460	850	384	33	839	79
BRGIC3	Meladiorite	GIC 3-25	GIC3_27_2B	sector	rim	bright		147700	6500	55.7	7.7	4.6	1.8	462	22	0.0043	0.009	4.15	0.61	0.02	0.022	0.15	0.15	0.36	0.23	0.013	0.025	4.5	1.3	1.88	0.44	33.7	4.2	12.97	0.76	67.8	6.2	18.6	2.1	175	12	34.9	2.9	14080	710	89.1	8.6	263	19
BRGIC3	Meladiorite	GIC 3-26	GIC3_27_2B	sector	rim	dark		159000	11000	79	10	7.8	1.8	1650	130	0.007	0.014	3.27	0.63	0.118	0.05	3.09	0.68	4.2	1.1	0.82	0.34	32.1	3.8	12	1.3	155	14	56.7	4	255	22	57.9	3.5	457	28	83.3	5.3	9590	550	73.8	5.7	131	10
BRGIC3	Meladiorite	GIC 3-27	GIC3_27_2B	sector	core	dark		151500	8600	66.6	6.9	7.7	3.1	1497	85	0.0065	0.0092	3.39	0.58	0.072	0.056	1.6	0.96	3.06	0.9	0.65	0.21	25.9	4.8	10.2	1.1	135.6	8.3	48.4	3.1	222	13	47	2.4	422	30	73	4.2	9520	480	58.2	4.1	109.3	6.7
BRGIC3	Meladiorite	GIC 3-28	GIC3_27_2B	sector	rim	dark		153100	5200	61.1	9.2	6.4	2.4	860	360	0.015	0.021	4.28	0.72	0.081	0.058	0.93	0.54	1.5	1.1	0.43	0.31	15.9	8.9	5.5	2.9	76	34	31	13	142	54	33	10	285	97	55	17	12600	1800	84.3	6.8	242	36
BRGIC3	Meladiorite	GIC 3-29	GIC3_27_2B	sector	rim	bright		162000	11000	84.8	8.3	7.9	2.1	1667	87	0.006	0.012	3.77	0.47	0.168	0.044	3.52	0.72	3.94	0.62	0.85	0.18	31	3.9	11.18	0.73	154	12	56.5	4.6	253	17	60.3	3.2	466	24	87.6	5.9	9290	300	66.4	5.1	130	12
BRGIC3	Meladiorite	GIC 3-30	GIC3_27_2B	sector	rim	bright		152700	8000	66	14	8	2.4	1360	340	0.0071	0.0099	3.4	0.53	0.17	0.1	1.95	0.8	3.1	1.3	0.41	0.2	22.8	6.1	8.7	2.4	114	31	46	12	219	50	51	12	422	89	79	17	10240	920	76	11	161.3	9.8
BRGIC3	Meladiorite	GIC 3-31	GIC3_19c_2A	sector	rim	bright		153200	8300	68	14	6.2	1.9	721	36	0.0034	0.0072	2.89	0.48	0.046	0.034	0.48	0.21	0.72	0.45	0.09	0.11	9.4	2.2	3.97	0.52	51.8	4.1	21.7	1.9	111.3	7	27.4	2	241	15	44.6	3.5	9960	390	34.1	3.2	89.5	6.8
BRGIC3	Meladiorite	GIC 3-32	GIC3_19c_2A	sector	rim	bright		151700	7400	75	11	7.5	1.8	1831	91	0.024	0.021	3.79	0.56	0.26	0.12	2.89	0.68	4.73	0.89	0.78	0.27	34.1	3.6	11.8	1	168	11	60.2	4.4	282	21	60.8	5.2	511	42	97.4	6.5	9110	680	82.1	7.2	151	13
BRGIC3	Meladiorite	GIC 3-33	GIC3_19c_2A	sector	core	brown		152300	6600	67	10	6.6	2.5	1636	59	0.006	0.012	3.93	0.57	0.098	0.06	2.06	0.54	5.15	0.93	0.66	0.16	32.4	4.4	11.6	1	156.1	9.6	53.7	2.4	250	13	58.5	2.5	469	36	88.2	4.4	9310	380	74	3.4	140.2	6.7
BRGIC3	Meladiorite	GIC 3-34	GIC3_19c_2A	sector	core	brown		157000	8600	72	14	6.2	1.7	1693	82	0.027	0.022	3.67	0.57	0.179	0.071	2.35	0.87	4.9	1.6	0.5	0.2	36.5	4.4	12.9	1.3	163	15	61	5.1	260	19	58.5	3.8	492	35	91.3	5.3	9840	450	77.5	6.6	142.2	6.9
[truncated: 435 more rows]
[truncated: 30 more columns]

## Sheet: Zircon oxygen isotopes
Table S5: Zircon oxygen isotopes
Sample	zircon	spot	rock type	map unit	core/rim/unzoned	Latitude	Longitude		δ18O	2σ
[truncated: 30 more rows]
