# Supplementary material
Source: publisher figshare collection journal article supplement (https://gsapubs.figshare.com/articles/dataset/_/25444633)
Supplement: Supplementary file 4 [file 2]

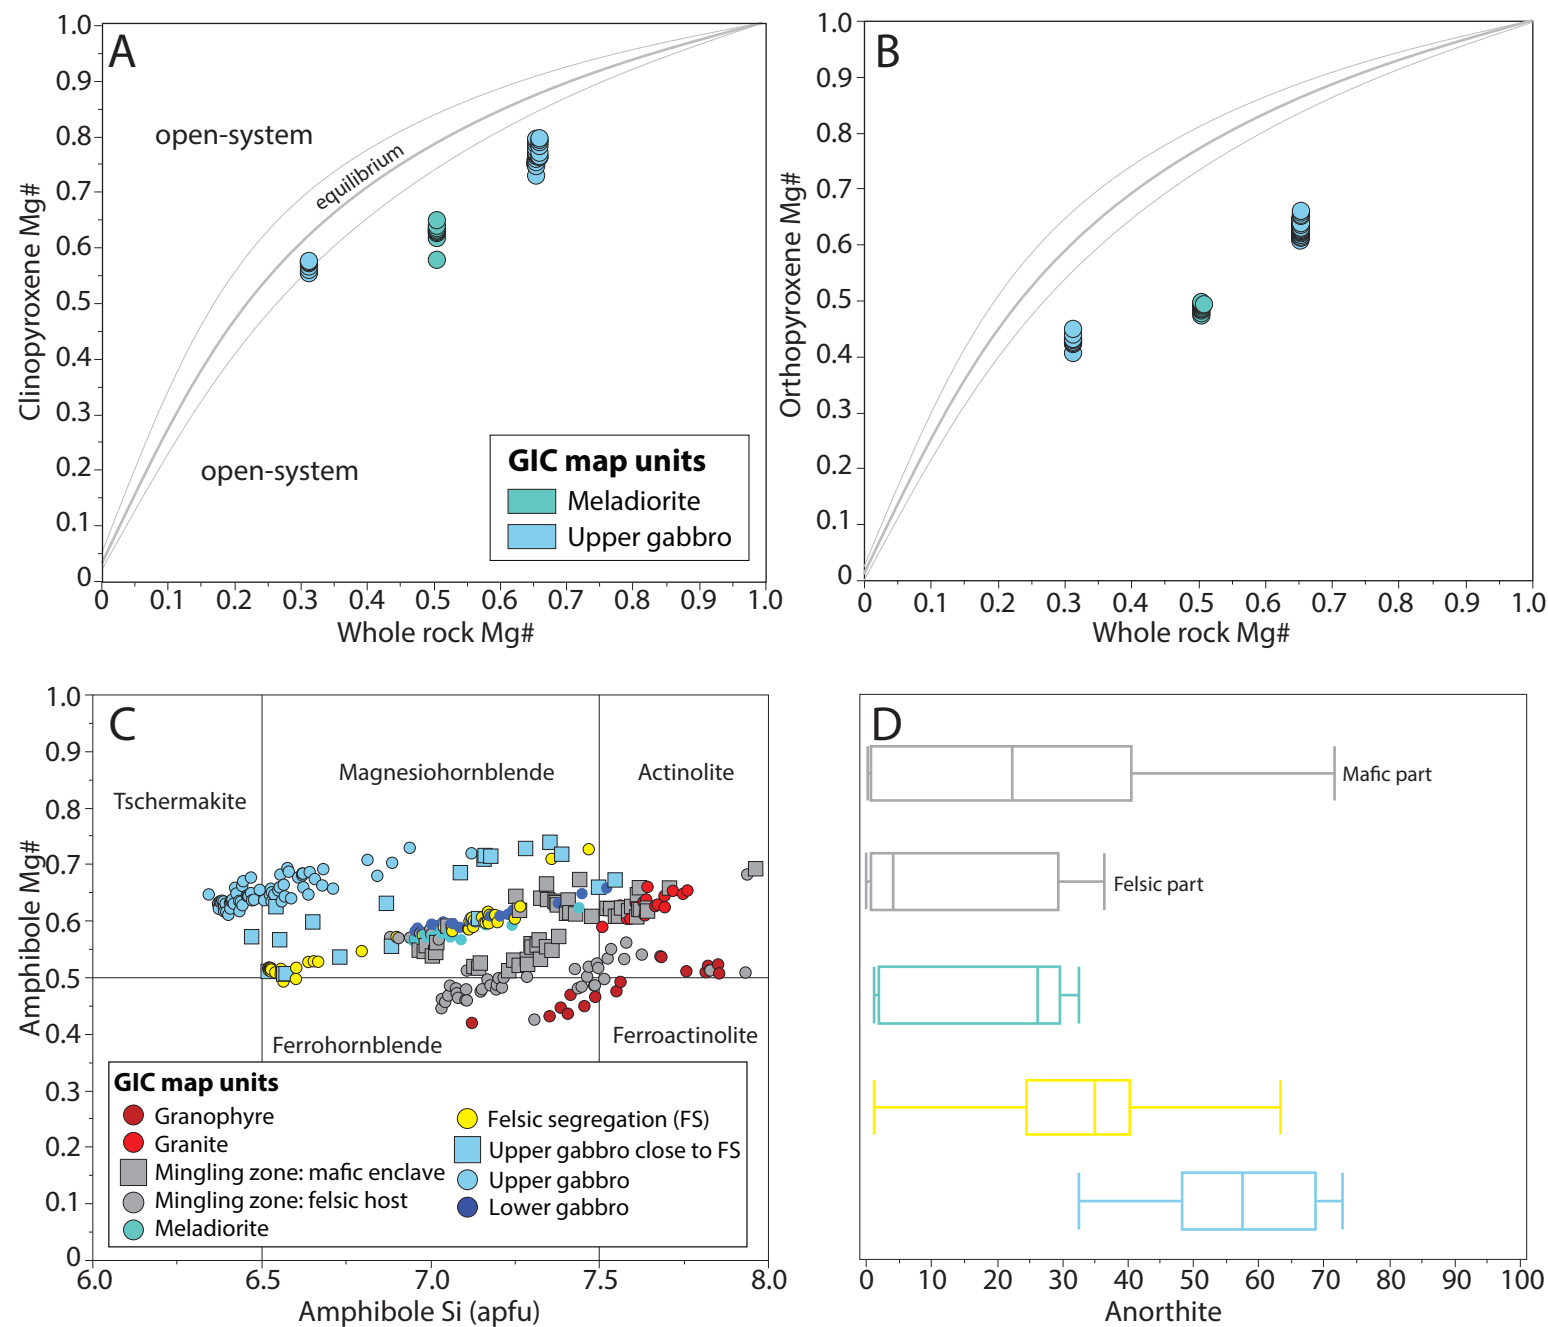

Ratschbacher, B.C., Ardill, K., Keller, C.B., Schoene, B., Paterson, S.R., Putirka, K.D., Lackey, J.S., and Paige, M.L., 2024, Multi-scale, open-system magmatic and sub-solidus processes contribute to the chemical and isotopic characteristics of the Jurassic Guadalupe Igneous Complex, Sierra Nevada, California, USA: *Geosphere*, v. 20, <https://doi.org/10.1130/GES02689.1>.
