# Supplementary material
Source: publisher figshare collection journal article supplement (https://gsapubs.figshare.com/articles/dataset/_/25444633)

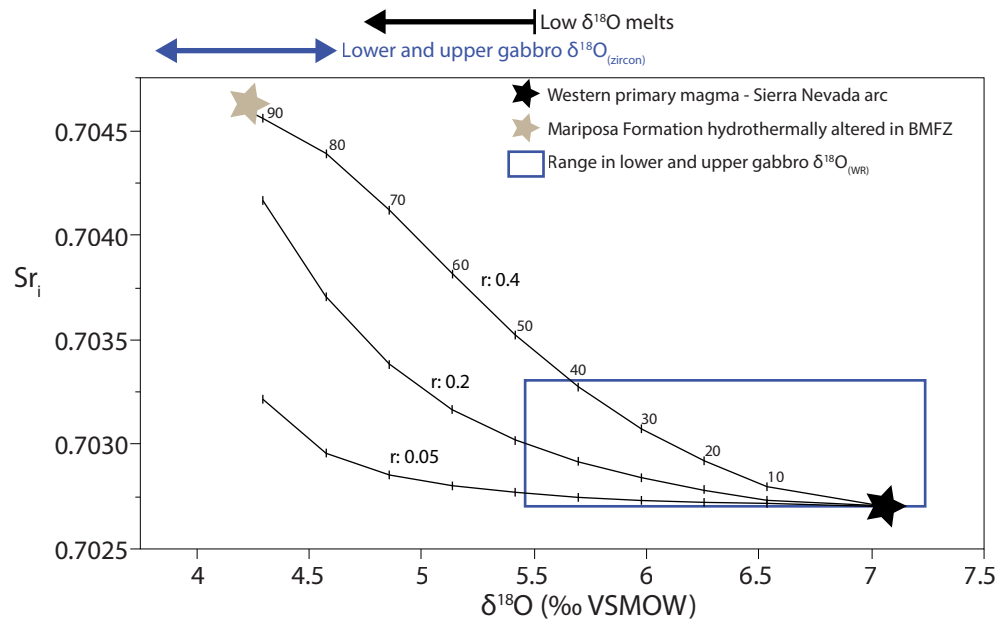

Supplement: Supplementary file 3 [file 2]
